# Supplementary material
Source: PubMed Central journal article supplement (PMC8981362)
Supplement: NIHMS1766628-supplement-Supporting_information.pdf [file NIHMS1766628-supplement-Supporting_information.pdf]

## **SUPPLEMENTARY INFORMATION**

### **CONTROLLABLE GENOME EDITING WITH SPLIT-ENGINEERED BASE EDITORS**

Kiara N. Berríos<sup>1</sup>, Niklaus H. Evitt<sup>2</sup>, Rachel A. DeWeerd<sup>3</sup>, Diqui Ren<sup>4</sup>, Meiqi Luo<sup>5</sup>, Aleksia Barka<sup>5</sup>, Tong Wang<sup>1</sup>, Caroline R. Bartman<sup>6,7</sup>, Yemin Lan<sup>6</sup>, Abby M. Green<sup>3</sup>, Junwei Shi<sup>4,6,7\*</sup> and Rahul M. Kohli<sup>5,6,8\*</sup>

<sup>1</sup>Graduate Group in Biochemistry and Molecular Biophysics, Perelman School of Medicine, University of Pennsylvania, Philadelphia, Pennsylvania, 19104, USA.

<sup>2</sup>Graduate Group in Cell and Molecular Biology, Perelman School of Medicine, University of Pennsylvania, Philadelphia, Pennsylvania, 19104, USA.

<sup>3</sup>Department of Pediatrics, Washington University School of Medicine, St. Louis, Missouri, 63110 USA

<sup>4</sup>Department of Cancer Biology, Perelman School of Medicine, University of Pennsylvania, Philadelphia, Pennsylvania, 19104, USA.

<sup>5</sup>Department of Medicine, Perelman School of Medicine, University of Pennsylvania, Philadelphia, Pennsylvania, 19104, USA.

<sup>6</sup>Epigenetics Institute, Department of Cell and Developmental Biology, Perelman School of Medicine, University of Pennsylvania, Philadelphia, Pennsylvania, 19104, USA.

<sup>7</sup>Abramson Family Cancer Research Institute, Perelman School of Medicine, University of Pennsylvania, Philadelphia, Pennsylvania, 19104, USA.

<sup>8</sup>Department of Biochemistry and Biophysics, Perelman School of Medicine, University of Pennsylvania, Philadelphia, Pennsylvania, 19104, USA.

#### ***Supplementary Figures***

|                                                                                                                                            |    |
|--------------------------------------------------------------------------------------------------------------------------------------------|----|
| Supplementary Figure 1: Base editing efficiency of evoA1-seBE-T2A constructs<br>in human cells at diverse loci and off-target sites.....   | 2  |
| Supplementary Figure 2: Base editing efficiency of evoA1-seBE-IRES constructs<br>in human cells at diverse loci and off-target sites. .... | 16 |
| Supplementary Figure 3: Base editing efficiency of AID'-seBE-IRES constructs<br>in human cells at diverse loci and off-target sites.....   | 23 |
| Supplementary Figure 4: R-loop assay to examine sgRNA-independent off-target activity .....                                                | 30 |

#### ***Supplementary Note***

|                        |    |
|------------------------|----|
| Vector Sequences ..... | 37 |
|------------------------|----|

**Supplementary Figure 1. Base editing efficiency of evoA1-seBE-T2A constructs in human cells at diverse loci and off-target sites.** The frequency of individual base calls at each locus of interest are shown, colored using a heat map from white (0%) to red (100%). The parent sequence is shown with PAM (yellow) and sgRNA protospacer (black) noted. When the PAM is at right, the coding strand cytosine (C) targeted for mutation is highlighted in red. When the PAM is at left, the non-coding strand cytosine is targeted, and the associated coding strand (G) is highlighted in red. The data in Fig. 3b show the quantification of conversion at the target base only, with individual loci shown in Extended Data Fig. 5a. Results across each locus with individual replicates are shown using untreated cells (n = 1), along with intact evoA1-BE4max or evoA1-seBE-T2A with or without rapamycin (n = 3 each). The loci analyzed and desired mutations are (a) CDA E67R targeting the active site residue, (b) CDA Q104\* nonsense mutation, (c) IDH1 R132H neomorphic mutation, (d) TDG Q51\* nonsense mutation, (e) TDG Q172\* nonsense mutation, (f) TET2 nonsense mutation Q180\*, (g) IDH2 R172K neomorphic mutation, (h) validated EMX1 targeting site, (i) validated EMX1 off-target site 1 (OT1) (j) validated EMX1 off-target site 2 (OT2), (k) validated FANCF targeting site, (l) validated FANCF off-target site 1 (OT1), (m) validated FANCF off-target site 2 (OT2).

# Supplementary Figure 1

| a         |   | CDA E67R |       |      |      |       |      |       |      |      |      |     |     |       |     |       |       |       |       |     |      |     |     |       |     |      |     |       |       |       |
|-----------|---|----------|-------|------|------|-------|------|-------|------|------|------|-----|-----|-------|-----|-------|-------|-------|-------|-----|------|-----|-----|-------|-----|------|-----|-------|-------|-------|
|           |   | P61      |       |      | L62  |       |      |       | G63  |      |      | I64 |     |       |     | C65   |       |       | A66   |     |      | E67 |     |       |     |      |     |       |       |       |
| untreated | A | 0.0      | 0.0   | 0.0  | 0.1  | 0.0   | 0.0  | 0.0   | 0.1  | 0.0  | 99.9 | 0.0 | 0.0 | 0.0   | 0.0 | 0.1   | 0.0   | 0.0   | 0.0   | 0.0 | 99.9 | 0.0 | 0.0 | 0.0   | 0.0 | 0.0  | 0.1 | 100.0 | 100.0 | 0.0   |
|           | C | 99.9     | 100.0 | 99.9 | 0.0  | 100.0 | 0.0  | 0.0   | 0.0  | 0.0  | 99.9 | 0.0 | 0.0 | 100.0 | 0.0 | 0.0   | 0.0   | 0.0   | 0.0   | 0.0 | 99.9 | 0.0 | 0.0 | 0.0   | 0.0 | 99.9 | 0.0 | 0.0   | 0.0   | 100.0 |
|           | G | 0.0      | 0.0   | 0.0  | 99.9 | 0.0   | 0.0  | 100.0 | 99.9 | 99.9 | 0.0  | 0.0 | 0.0 | 0.0   | 0.0 | 100.0 | 0.0   | 100.0 | 0.0   | 0.0 | 99.9 | 0.0 | 0.0 | 99.9  | 0.0 | 0.0  | 0.0 | 0.0   | 0.0   | 0.0   |
|           | T | 0.0      | 0.0   | 0.0  | 0.0  | 0.0   | 99.9 | 0.0   | 0.0  | 99.9 | 0.0  | 0.0 | 0.0 | 0.0   | 0.0 | 0.0   | 100.0 | 0.0   | 100.0 | 0.0 | 99.9 | 0.0 | 0.1 | 100.0 | 0.0 | 0.0  | 0.0 | 0.0   | 0.0   | 0.0   |
|           | - | 0.0      | 0.0   | 0.0  | 0.0  | 0.0   | 0.0  | 0.0   | 0.0  | 0.0  | 0.0  | 0.0 | 0.0 | 0.0   | 0.0 | 0.0   | 0.0   | 0.0   | 0.0   | 0.0 | 0.0  | 0.0 | 0.0 | 0.0   | 0.0 | 0.0  | 0.0 | 0.0   | 0.0   | 0.0   |

  

|                              |   | PAM  |      |      | 20   |      |      |      | 15   |      |      | 10   |      |      |      | 5    |      |      | 1   |      |      |      |      |      |     |
|------------------------------|---|------|------|------|------|------|------|------|------|------|------|------|------|------|------|------|------|------|-----|------|------|------|------|------|-----|
|                              |   | C    | C    | C    | G    | C    | T    | G    | G    | G    | C    | A    | T    | C    | T    | G    | T    | G    | C   | T    | G    | A    | A    | C    |     |
| evoA1-seB:max<br>Replicate 1 | A | 0.0  | 0.0  | 0.0  | 0.0  | 0.0  | 0.0  | 0.7  | 3.6  | 0.6  | 0.0  | 99.2 | 0.0  | 0.1  | 0.0  | 2.7  | 0.0  | 59.5 | 0.0 | 0.0  | 59.2 | 99.7 | 99.8 | 0.0  | 0.0 |
|                              | C | 99.9 | 99.8 | 99.8 | 0.0  | 99.8 | 0.0  | 0.0  | 0.0  | 0.0  | 99.3 | 0.0  | 0.0  | 99.1 | 0.0  | 0.0  | 0.2  | 99.2 | 0.0 | 0.1  | 0.0  | 0.0  | 0.0  | 99.8 |     |
|                              | G | 0.0  | 0.0  | 0.0  | 99.8 | 0.0  | 0.0  | 98.6 | 95.6 | 98.7 | 0.0  | 0.0  | 0.0  | 0.0  | 0.0  | 96.3 | 0.0  | 39.2 | 0.0 | 0.0  | 39.8 | 0.0  | 0.0  | 0.0  |     |
|                              | T | 0.0  | 0.1  | 0.0  | 0.0  | 0.0  | 99.8 | 0.0  | 0.2  | 0.0  | 0.0  | 0.0  | 99.2 | 0.0  | 99.0 | 0.1  | 99.1 | 0.3  | 0.0 | 99.4 | 0.3  | 0.0  | 0.0  | 0.0  |     |
|                              | - | 0.1  | 0.1  | 0.1  | 0.1  | 0.2  | 0.2  | 0.6  | 0.6  | 0.7  | 0.7  | 0.7  | 0.8  | 0.8  | 0.9  | 0.9  | 0.9  | 0.8  | 0.7 | 0.6  | 0.5  | 0.3  | 0.2  | 0.2  |     |

  

|                              |   | PAM   |      |      | 20   |      |      |      | 15   |      |      | 10   |      |      |      | 5    |      |      | 1   |      |      |      |      |      |     |
|------------------------------|---|-------|------|------|------|------|------|------|------|------|------|------|------|------|------|------|------|------|-----|------|------|------|------|------|-----|
|                              |   | C     | C    | C    | G    | C    | T    | G    | G    | G    | C    | A    | T    | C    | T    | G    | T    | G    | C   | T    | G    | A    | A    | C    |     |
| evoA1-seB:max<br>Replicate 2 | A | 0.0   | 0.0  | 0.0  | 0.0  | 0.1  | 0.0  | 1.1  | 2.8  | 0.4  | 0.0  | 99.6 | 0.0  | 0.0  | 0.0  | 3.1  | 0.0  | 59.1 | 0.0 | 0.0  | 58.8 | 99.8 | 99.9 | 0.0  | 0.0 |
|                              | C | 100.0 | 99.9 | 99.9 | 0.0  | 99.9 | 0.0  | 0.0  | 0.0  | 0.0  | 99.6 | 0.0  | 0.0  | 99.5 | 0.0  | 0.1  | 0.2  | 99.5 | 0.0 | 0.2  | 0.0  | 0.0  | 0.0  | 99.8 |     |
|                              | G | 0.0   | 0.0  | 0.0  | 99.9 | 0.0  | 0.1  | 98.6 | 96.7 | 99.2 | 0.0  | 0.0  | 0.0  | 0.0  | 0.0  | 96.3 | 0.0  | 39.7 | 0.0 | 0.0  | 40.3 | 0.0  | 0.0  | 0.0  |     |
|                              | T | 0.0   | 0.1  | 0.0  | 0.0  | 0.0  | 99.9 | 0.1  | 0.2  | 0.1  | 0.0  | 0.0  | 99.5 | 0.0  | 99.4 | 0.0  | 99.3 | 0.4  | 0.0 | 99.5 | 0.3  | 0.0  | 0.0  | 0.0  |     |
|                              | - | 0.0   | 0.0  | 0.0  | 0.0  | 0.0  | 0.0  | 0.3  | 0.2  | 0.1  | 0.3  | 0.4  | 0.4  | 0.5  | 0.6  | 0.6  | 0.6  | 0.6  | 0.5 | 0.5  | 0.4  | 0.2  | 0.1  | 0.1  |     |

  

|                              |   | PAM  |      |      | 20   |      |      |      | 15   |      |      | 10   |      |      |      | 5    |      |      | 1   |      |      |      |      |      |     |
|------------------------------|---|------|------|------|------|------|------|------|------|------|------|------|------|------|------|------|------|------|-----|------|------|------|------|------|-----|
|                              |   | C    | C    | C    | G    | C    | T    | G    | G    | G    | C    | A    | T    | C    | T    | G    | T    | G    | C   | T    | G    | A    | A    | C    |     |
| evoA1-seB:max<br>Replicate 3 | A | 0.0  | 0.0  | 0.0  | 0.1  | 0.0  | 0.0  | 0.8  | 3.2  | 0.5  | 0.0  | 99.4 | 0.0  | 0.0  | 0.0  | 2.9  | 0.0  | 57.5 | 0.0 | 0.0  | 57.6 | 99.7 | 99.7 | 0.0  | 0.0 |
|                              | C | 99.9 | 99.9 | 99.9 | 0.0  | 99.9 | 0.0  | 0.0  | 0.0  | 0.0  | 99.6 | 0.0  | 0.0  | 99.4 | 0.0  | 0.1  | 0.2  | 99.4 | 0.0 | 0.2  | 0.0  | 0.0  | 0.0  | 99.8 |     |
|                              | G | 0.0  | 0.0  | 0.0  | 99.9 | 0.0  | 0.0  | 98.6 | 96.2 | 99.0 | 0.0  | 0.0  | 0.0  | 0.0  | 0.0  | 96.5 | 0.0  | 41.5 | 0.0 | 0.0  | 41.6 | 0.0  | 0.0  | 0.0  |     |
|                              | T | 0.0  | 0.1  | 0.1  | 0.0  | 0.0  | 99.9 | 0.0  | 0.1  | 0.0  | 0.0  | 0.0  | 99.4 | 0.0  | 99.3 | 0.0  | 99.3 | 0.3  | 0.0 | 99.5 | 0.3  | 0.0  | 0.0  | 0.0  |     |
|                              | - | 0.1  | 0.1  | 0.1  | 0.1  | 0.1  | 0.1  | 0.5  | 0.5  | 0.5  | 0.4  | 0.5  | 0.6  | 0.6  | 0.6  | 0.6  | 0.6  | 0.6  | 0.6 | 0.6  | 0.5  | 0.4  | 0.3  | 0.2  |     |

  

|                                    |   | PAM   |       |       | 20   |       |       |      | 15   |      |      | 10   |      |      |      | 5    |      |      | 1   |      |      |       |       |     |       |
|------------------------------------|---|-------|-------|-------|------|-------|-------|------|------|------|------|------|------|------|------|------|------|------|-----|------|------|-------|-------|-----|-------|
|                                    |   | C     | C     | C     | G    | C     | T     | G    | G    | G    | C    | A    | T    | C    | T    | G    | T    | G    | C   | T    | G    | A     | A     | C   |       |
| evoA1-seB: T2A +Rap<br>Replicate 1 | A | 0.0   | 0.0   | 0.0   | 0.1  | 0.0   | 0.0   | 0.4  | 1.9  | 0.2  | 0.0  | 99.8 | 0.0  | 0.0  | 0.0  | 1.0  | 0.0  | 38.0 | 0.0 | 0.0  | 38.7 | 100.0 | 100.0 | 0.0 | 0.0   |
|                                    | C | 100.0 | 100.0 | 100.0 | 0.0  | 100.0 | 0.0   | 0.0  | 0.0  | 0.0  | 99.8 | 0.0  | 0.0  | 99.8 | 0.0  | 0.1  | 0.1  | 99.9 | 0.0 | 0.0  | 0.0  | 0.0   | 0.0   | 0.0 | 100.0 |
|                                    | G | 0.0   | 0.0   | 0.0   | 99.9 | 0.0   | 0.0   | 99.4 | 97.8 | 99.6 | 0.0  | 0.0  | 0.0  | 0.0  | 0.0  | 98.9 | 0.0  | 61.8 | 0.0 | 0.0  | 61.2 | 0.0   | 0.0   | 0.0 | 0.0   |
|                                    | T | 0.0   | 0.0   | 0.0   | 0.0  | 0.0   | 100.0 | 0.0  | 0.1  | 0.0  | 0.0  | 0.0  | 99.8 | 0.0  | 99.8 | 0.0  | 99.8 | 0.1  | 0.0 | 99.9 | 0.1  | 0.0   | 0.0   | 0.0 | 0.0   |
|                                    | - | 0.0   | 0.0   | 0.0   | 0.0  | 0.0   | 0.0   | 0.2  | 0.2  | 0.2  | 0.2  | 0.2  | 0.2  | 0.2  | 0.2  | 0.1  | 0.1  | 0.1  | 0.1 | 0.1  | 0.1  | 0.0   | 0.0   | 0.0 | 0.0   |

  

|                                    |   | PAM  |       |      | 20   |      |      |      | 15   |      |       | 10    |       |       |      | 5    |      |      | 1     |       |      |       |       |     |      |
|------------------------------------|---|------|-------|------|------|------|------|------|------|------|-------|-------|-------|-------|------|------|------|------|-------|-------|------|-------|-------|-----|------|
|                                    |   | C    | C     | C    | G    | C    | T    | G    | G    | G    | C     | A     | T     | C     | T    | G    | T    | G    | C     | T     | G    | A     | A     | C   |      |
| evoA1-seB: T2A +Rap<br>Replicate 2 | A | 0.1  | 0.0   | 0.0  | 0.1  | 0.0  | 0.0  | 0.3  | 1.4  | 0.3  | 0.0   | 100.0 | 0.0   | 0.0   | 0.0  | 1.0  | 0.1  | 29.2 | 0.0   | 0.0   | 30.0 | 100.0 | 100.0 | 0.0 | 0.0  |
|                                    | C | 99.9 | 100.0 | 99.9 | 0.0  | 99.9 | 0.0  | 0.0  | 0.0  | 0.0  | 100.0 | 0.0   | 0.0   | 100.0 | 0.0  | 0.0  | 0.0  | 0.1  | 100.0 | 0.0   | 0.0  | 0.0   | 0.0   | 0.0 | 99.9 |
|                                    | G | 0.0  | 0.0   | 0.0  | 99.9 | 0.0  | 0.0  | 99.6 | 98.6 | 99.7 | 0.0   | 0.0   | 0.0   | 0.0   | 0.0  | 99.0 | 0.0  | 70.6 | 0.0   | 0.0   | 69.9 | 0.0   | 0.0   | 0.0 | 0.0  |
|                                    | T | 0.0  | 0.0   | 0.0  | 0.0  | 0.0  | 99.9 | 0.0  | 0.0  | 0.0  | 0.0   | 0.0   | 100.0 | 0.0   | 99.9 | 0.0  | 99.8 | 0.1  | 0.0   | 100.0 | 0.1  | 0.0   | 0.0   | 0.0 | 0.0  |
|                                    | - | 0.0  | 0.0   | 0.0  | 0.0  | 0.0  | 0.0  | 0.1  | 0.1  | 0.0  | 0.0   | 0.0   | 0.0   | 0.0   | 0.0  | 0.0  | 0.0  | 0.0  | 0.0   | 0.0   | 0.0  | 0.0   | 0.0   | 0.0 | 0.0  |

  

|                                    |   | PAM  |       |      | 20    |       |      |      | 15   |      |       | 10   |      |      |      | 5    |      |      | 1   |      |      |      |      |      |     |
|------------------------------------|---|------|-------|------|-------|-------|------|------|------|------|-------|------|------|------|------|------|------|------|-----|------|------|------|------|------|-----|
|                                    |   | C    | C     | C    | G     | C     | T    | G    | G    | G    | C     | A    | T    | C    | T    | G    | T    | G    | C   | T    | G    | A    | A    | C    |     |
| evoA1-seB: T2A +Rap<br>Replicate 3 | A | 0.0  | 0.0   | 0.1  | 0.0   | 0.0   | 0.0  | 0.5  | 1.8  | 0.4  | 0.0   | 99.9 | 0.0  | 0.0  | 0.0  | 1.3  | 0.1  | 37.8 | 0.0 | 0.0  | 38.9 | 99.9 | 99.9 | 0.0  | 0.0 |
|                                    | C | 99.9 | 100.0 | 99.9 | 0.0   | 100.0 | 0.0  | 0.0  | 0.0  | 0.0  | 100.0 | 0.0  | 0.0  | 99.9 | 0.0  | 0.0  | 0.1  | 99.9 | 0.0 | 0.0  | 0.0  | 0.0  | 0.1  | 99.9 |     |
|                                    | G | 0.0  | 0.0   | 0.0  | 100.0 | 0.0   | 0.0  | 99.5 | 98.1 | 99.5 | 0.0   | 0.0  | 0.0  | 0.0  | 0.0  | 98.7 | 0.0  | 62.0 | 0.0 | 0.1  | 61.1 | 0.0  | 0.0  | 0.0  |     |
|                                    | T | 0.0  | 0.0   | 0.0  | 0.0   | 0.0   | 99.9 | 0.0  | 0.0  | 0.1  | 0.0   | 0.0  | 99.9 | 0.0  | 99.9 | 0.0  | 99.9 | 0.0  | 0.0 | 99.8 | 0.0  | 0.0  | 0.0  | 0.0  | 0.0 |
|                                    | - | 0.0  | 0.0   | 0.0  | 0.0   | 0.0   | 0.0  | 0.1  | 0.1  | 0.0  | 0.0   | 0.0  | 0.0  | 0.1  | 0.1  | 0.1  | 0.1  | 0.1  | 0.1 | 0.1  | 0.1  | 0.0  | 0.0  | 0.0  | 0.0 |

  

|                                    |   | PAM   |       |       | 20    |       |       |      | 15   |      |       | 10    |       |       |       | 5    |       |      | 1     |       |      |       |       |     |       |
|------------------------------------|---|-------|-------|-------|-------|-------|-------|------|------|------|-------|-------|-------|-------|-------|------|-------|------|-------|-------|------|-------|-------|-----|-------|
|                                    |   | C     | C     | C     | G     | C     | T     | G    | G    | G    | C     | A     | T     | C     | T     | G    | T     | G    | C     | T     | G    | A     | A     | C   |       |
| evoA1-seB: T2A +Rap<br>Replicate 1 | A | 0.0   | 0.0   | 0.0   | 0.0   | 0.0   | 0.0   | 0.1  | 0.2  | 0.0  | 0.0   | 100.0 | 0.0   | 0.0   | 0.0   | 0.1  | 0.0   | 4.0  | 0.0   | 0.0   | 5.5  | 100.0 | 100.0 | 0.0 | 0.0   |
|                                    | C | 100.0 | 100.0 | 100.0 | 0.0   | 100.0 | 0.0   | 0.0  | 0.0  | 0.0  | 100.0 | 0.0   | 0.0   | 100.0 | 0.0   | 0.0  | 0.0   | 0.0  | 100.0 | 0.0   | 0.1  | 0.0   | 0.0   | 0.0 | 100.0 |
|                                    | G | 0.0   | 0.0   | 0.0   | 100.0 | 0.0   | 0.0   | 99.9 | 99.8 | 99.9 | 0.0   | 0.0   | 0.0   | 0.0   | 0.0   | 99.9 | 0.0   | 96.0 | 0.0   | 0.0   | 94.5 | 0.0   | 0.0   | 0.0 | 0.0   |
|                                    | T | 0.0   | 0.0   | 0.0   | 0.0   | 0.0   | 100.0 | 0.0  | 0.0  | 0.0  | 0.0   | 0.0   | 100.0 | 0.0   | 100.0 | 0.0  | 100.0 | 0.0  | 0.0   | 100.0 | 0.0  | 0.0   | 0.0   | 0.0 | 0.0   |
|                                    | - | 0.0   | 0.0   | 0.0   | 0.0   | 0.0   | 0.0   | 0.0  | 0.0  | 0.0  | 0.0   | 0.0   | 0.0   | 0.0   | 0.0   | 0.0  | 0.0   | 0.0  | 0.0   | 0.0   | 0.0  | 0.0   | 0.0   | 0.0 | 0.0   |

  

|                                    |   | PAM  |       |      | 20   |      |      |      | 15   |      |       | 10   |       |       |      | 5    |      |      | 1     |      |      |      |      |     |       |
|------------------------------------|---|------|-------|------|------|------|------|------|------|------|-------|------|-------|-------|------|------|------|------|-------|------|------|------|------|-----|-------|
|                                    |   | C    | C     | C    | G    | C    | T    | G    | G    | G    | C     | A    | T     | C     | T    | G    | T    | G    | C     | T    | G    | A    | A    | C   |       |
| evoA1-seB: T2A +Rap<br>Replicate 2 | A | 0.1  | 0.0   | 0.0  | 0.1  | 0.0  | 0.0  | 0.1  | 0.1  | 0.1  | 0.0   | 99.9 | 0.0   | 0.0   | 0.0  | 0.1  | 0.1  | 3.2  | 0.0   | 0.0  | 4.4  | 99.9 | 99.9 | 0.0 | 0.0   |
|                                    | C | 99.9 | 100.0 | 99.9 | 0.0  | 99.9 | 0.0  | 0.0  | 0.0  | 0.0  | 100.0 | 0.0  | 0.0   | 100.0 | 0.0  | 0.0  | 0.0  | 0.0  | 100.0 | 0.0  | 0.0  | 0.0  | 0.0  | 0.0 | 100.0 |
|                                    | G | 0.0  | 0.0   | 0.0  | 99.9 | 0.0  | 0.0  | 99.8 | 99.9 | 99.9 | 0.0   | 0.0  | 0.0   | 0.0   | 0.0  | 99.9 | 0.1  | 96.8 | 0.0   | 0.0  | 95.5 | 0.0  | 0.1  | 0.0 | 0.0   |
|                                    | T | 0.0  | 0.0   | 0.0  | 0.0  | 0.0  | 99.9 | 0.1  | 0.0  | 0.0  | 0.0   | 0.0  | 100.0 | 0.0   | 99.9 | 0.0  | 99.8 | 0.0  | 0.0   | 99.9 | 0.0  | 0.0  | 0.0  | 0.0 | 0.0   |
|                                    | - | 0.0  | 0.0   | 0.0  | 0.0  | 0.0  | 0.0  | 0.0  | 0.0  | 0.0  | 0.0   | 0.0  | 0.0   | 0.0   | 0.0  | 0.0  | 0.0  | 0.0  | 0.0   | 0.0  | 0.0  | 0.0  | 0.0  | 0.0 | 0.0   |

  

|                                    |   | PAM |     |     | 20  |   |   |   | 15 |   |   | 10 |   |   |   | 5 |   |   | 1 |   |   |   |
|------------------------------------|---|-----|-----|-----|-----|---|---|---|----|---|---|----|---|---|---|---|---|---|---|---|---|---|
|                                    |   | C   | C   | C   | G   | C | T | G | G  | G | C | A  | T | C | T | G | T | G | C | T | G | A |
| evoA1-seB: T2A +Rap<br>Replicate 3 | A | 0.0 | 0.0 | 0.0 | 0.1 | 0 |   |   |    |   |   |    |   |   |   |   |   |   |   |   |   |   |

# Supplementary Figure 1

| b         |     | CDA Q104* |       |      |      |      |       |      |       |       |       |       |     |       |      |       |       |       |       |       |       |       |       |       |       |
|-----------|-----|-----------|-------|------|------|------|-------|------|-------|-------|-------|-------|-----|-------|------|-------|-------|-------|-------|-------|-------|-------|-------|-------|-------|
|           |     | C102      |       |      |      | R103 |       |      | Q104  |       |       | V105  |     |       | M106 |       |       | R107  |       |       | E108  |       |       |       |       |
| untreated |     | C         | T     | G    | C    | A    | G     | G    | C     | A     | A     | G     | T   | C     | A    | T     | G     | A     | G     | A     | G     | A     | G     | G     |       |
|           | A   | 0.0       | 0.0   | 0.1  | 0.0  | 99.9 | 0.0   | 0.1  | 0.0   | 100.0 | 100.0 | 0.0   | 0.0 | 0.0   | 0.0  | 100.0 | 0.0   | 0.0   | 100.0 | 0.0   | 100.0 | 0.0   | 100.0 | 0.0   | 0.0   |
|           | C   | 100.0     | 0.0   | 0.0  | 99.9 | 0.0  | 0.0   | 0.0  | 100.0 | 0.0   | 0.0   | 0.0   | 0.0 | 100.0 | 0.0  | 0.0   | 0.0   | 0.0   | 0.0   | 0.0   | 0.0   | 0.0   | 0.0   | 0.0   | 0.0   |
|           | G   | 0.0       | 0.0   | 99.9 | 0.0  | 0.1  | 100.0 | 99.9 | 0.0   | 0.0   | 0.0   | 100.0 | 0.0 | 0.0   | 0.0  | 0.0   | 0.0   | 100.0 | 0.0   | 100.0 | 0.0   | 100.0 | 0.0   | 100.0 | 100.0 |
|           | T   | 0.0       | 100.0 | 0.0  | 0.1  | 0.0  | 0.0   | 0.0  | 0.0   | 0.0   | 0.0   | 0.0   | 0.0 | 100.0 | 0.0  | 0.0   | 100.0 | 0.0   | 0.0   | 0.0   | 0.0   | 0.0   | 0.0   | 0.0   | 0.0   |
| -         | 0.0 | 0.0       | 0.0   | 0.0  | 0.0  | 0.0  | 0.0   | 0.0  | 0.0   | 0.0   | 0.0   | 0.0   | 0.0 | 0.0   | 0.0  | 0.0   | 0.0   | 0.0   | 0.0   | 0.0   | 0.0   | 0.0   | 0.0   | 0.0   |       |

  

| evoA1_sEBE-max | Replicate 1 | PAM  |      |      |      |      |      |      |      |      |     |      |      |      |      |      |      |      |      |      |       |      |      |      |      |
|----------------|-------------|------|------|------|------|------|------|------|------|------|-----|------|------|------|------|------|------|------|------|------|-------|------|------|------|------|
|                |             | I    | C    | T    | G    | C    | A    | G    | G    | C    | A   | A    | G    | T    | C    | A    | T    | G    | A    | G    | A     | G    | A    | G    | G    |
| A              | 0.1         | 0.0  | 0.0  | 0.6  | 99.4 | 0.2  | 0.0  | 0.4  | 99.1 | 99.1 | 0.0 | 0.0  | 0.1  | 99.5 | 0.0  | 0.2  | 99.8 | 0.1  | 99.9 | 0.0  | 100.0 | 0.1  | 0.0  | 0.0  | 0.0  |
| C              | 78.7        | 0.0  | 0.0  | 36.3 | 0.0  | 0.1  | 0.0  | 39.8 | 0.0  | 0.0  | 0.0 | 0.0  | 91.3 | 0.0  | 0.0  | 0.0  | 0.0  | 0.0  | 0.0  | 0.0  | 0.0   | 0.0  | 0.0  | 0.0  | 0.0  |
| G              | 0.0         | 0.0  | 99.6 | 0.3  | 0.1  | 99.0 | 99.1 | 1.8  | 0.0  | 0.0  | 0.0 | 99.0 | 0.0  | 0.0  | 0.0  | 99.4 | 0.0  | 99.8 | 0.0  | 99.9 | 0.0   | 99.8 | 99.9 | 99.9 | 99.9 |
| T              | 20.8        | 99.6 | 0.0  | 62.2 | 0.0  | 0.0  | 0.0  | 56.6 | 0.0  | 0.0  | 0.0 | 99.2 | 7.9  | 0.0  | 99.6 | 0.0  | 0.0  | 0.0  | 0.0  | 0.0  | 0.0   | 0.0  | 0.0  | 0.0  | 0.0  |
| -              | 0.4         | 0.4  | 0.4  | 0.6  | 0.6  | 0.8  | 0.8  | 1.4  | 0.9  | 0.9  | 1.0 | 0.8  | 0.7  | 0.5  | 0.4  | 0.4  | 0.2  | 0.1  | 0.1  | 0.0  | 0.0   | 0.0  | 0.0  | 0.0  | 0.0  |

  

| evoA1_sEBE-max | Replicate 2 | PAM  |      |      |      |      |      |      |      |      |     |      |      |      |      |      |      |      |      |      |      |      |       |       |     |
|----------------|-------------|------|------|------|------|------|------|------|------|------|-----|------|------|------|------|------|------|------|------|------|------|------|-------|-------|-----|
|                |             | I    | C    | T    | G    | C    | A    | G    | G    | C    | A   | A    | G    | T    | C    | A    | T    | G    | A    | G    | A    | G    | A     | G     | G   |
| A              | 0.3         | 0.0  | 0.1  | 0.8  | 99.5 | 0.3  | 0.0  | 0.2  | 99.3 | 99.2 | 0.0 | 0.0  | 0.3  | 99.4 | 0.0  | 0.2  | 99.7 | 0.0  | 99.7 | 0.1  | 99.8 | 0.2  | 0.0   | 0.0   | 0.0 |
| C              | 79.9        | 0.0  | 0.0  | 41.7 | 0.0  | 0.0  | 0.0  | 45.3 | 0.0  | 0.1  | 0.0 | 0.0  | 91.9 | 0.0  | 0.0  | 0.0  | 0.0  | 0.0  | 0.0  | 0.1  | 0.0  | 0.1  | 0.0   | 0.0   | 0.0 |
| G              | 0.1         | 0.0  | 99.5 | 0.2  | 0.0  | 99.1 | 99.2 | 1.4  | 0.0  | 0.0  | 0.0 | 99.2 | 0.0  | 0.0  | 0.0  | 99.5 | 0.1  | 99.8 | 0.0  | 99.8 | 0.1  | 99.7 | 100.0 | 100.0 |     |
| T              | 19.3        | 99.6 | 0.0  | 56.8 | 0.0  | 0.1  | 0.1  | 52.2 | 0.0  | 0.0  | 0.0 | 99.2 | 7.1  | 0.0  | 99.7 | 0.0  | 0.0  | 0.0  | 0.0  | 0.0  | 0.0  | 0.0  | 0.0   | 0.0   | 0.0 |
| -              | 0.5         | 0.4  | 0.4  | 0.5  | 0.4  | 0.6  | 0.7  | 0.9  | 0.7  | 0.8  | 0.8 | 0.8  | 0.7  | 0.5  | 0.3  | 0.3  | 0.2  | 0.2  | 0.3  | 0.2  | 0.2  | 0.1  | 0.0   | 0.0   | 0.0 |

  

| evoA1_sEBE-max | Replicate 3 | PAM  |      |      |      |      |      |      |      |      |     |      |      |     |      |      |     |      |     |      |     |      |      |      |     |
|----------------|-------------|------|------|------|------|------|------|------|------|------|-----|------|------|-----|------|------|-----|------|-----|------|-----|------|------|------|-----|
|                |             | I    | C    | T    | G    | C    | A    | G    | G    | C    | A   | A    | G    | T   | C    | A    | T   | G    | A   | G    | A   | G    | A    | G    | G   |
| A              | 0.1         | 0.0  | 0.0  | 0.5  | 99.4 | 0.3  | 0.0  | 0.5  | 99.1 | 99.1 | 0.0 | 0.0  | 0.0  | 0.0 | 99.4 | 0.0  | 0.1 | 99.7 | 0.1 | 99.7 | 0.0 | 99.9 | 0.1  | 0.0  | 0.0 |
| C              | 78.0        | 0.0  | 0.0  | 37.0 | 0.0  | 0.0  | 0.0  | 40.5 | 0.0  | 0.0  | 0.0 | 0.0  | 91.5 | 0.0 | 0.0  | 0.0  | 0.0 | 0.0  | 0.1 | 0.0  | 0.0 | 0.0  | 0.0  | 0.0  | 0.0 |
| G              | 0.0         | 0.0  | 99.6 | 0.5  | 0.0  | 99.1 | 99.2 | 1.9  | 0.0  | 0.0  | 0.0 | 99.2 | 0.0  | 0.0 | 0.0  | 99.5 | 0.0 | 99.7 | 0.0 | 99.9 | 0.0 | 99.8 | 99.9 | 99.9 |     |
| T              | 21.5        | 99.6 | 0.0  | 61.5 | 0.0  | 0.0  | 0.0  | 55.9 | 0.0  | 0.0  | 0.0 | 99.3 | 7.9  | 0.0 | 99.6 | 0.0  | 0.0 | 0.0  | 0.0 | 0.0  | 0.0 | 0.0  | 0.0  | 0.0  | 0.0 |
| -              | 0.4         | 0.3  | 0.4  | 0.6  | 0.6  | 0.7  | 0.8  | 1.2  | 0.8  | 0.9  | 0.8 | 0.7  | 0.6  | 0.5 | 0.4  | 0.4  | 0.2 | 0.2  | 0.2 | 0.2  | 0.1 | 0.1  | 0.1  | 0.0  | 0.0 |

  

| evoA1_sEBE-T2A+Rap | Replicate 1 | PAM  |      |      |      |      |      |      |      |      |     |      |     |      |      |      |     |      |     |      |     |       |       |       |     |
|--------------------|-------------|------|------|------|------|------|------|------|------|------|-----|------|-----|------|------|------|-----|------|-----|------|-----|-------|-------|-------|-----|
|                    |             | I    | C    | T    | G    | C    | A    | G    | G    | C    | A   | A    | G   | T    | C    | A    | T   | G    | A   | G    | A   | G     | A     | G     | G   |
| A                  | 0.1         | 0.0  | 0.0  | 0.1  | 99.8 | 0.1  | 0.0  | 0.3  | 99.8 | 99.8 | 0.0 | 0.0  | 0.0 | 0.0  | 99.8 | 0.0  | 0.0 | 99.9 | 0.0 | 99.9 | 0.0 | 100.0 | 0.1   | 0.0   | 0.0 |
| C                  | 85.7        | 0.0  | 0.0  | 51.8 | 0.0  | 0.0  | 0.0  | 57.1 | 0.0  | 0.0  | 0.0 | 0.0  | 0.0 | 92.4 | 0.0  | 0.0  | 0.0 | 0.0  | 0.0 | 0.0  | 0.0 | 0.0   | 0.0   | 0.0   | 0.0 |
| G                  | 0.0         | 0.0  | 99.9 | 0.1  | 0.0  | 99.8 | 99.9 | 1.3  | 0.0  | 0.0  | 0.0 | 99.8 | 0.0 | 0.0  | 0.0  | 99.9 | 0.0 | 99.9 | 0.0 | 99.9 | 0.0 | 99.9  | 100.0 | 100.0 |     |
| T                  | 14.1        | 99.9 | 0.0  | 47.8 | 0.0  | 0.0  | 0.0  | 40.9 | 0.0  | 0.0  | 0.0 | 99.8 | 7.5 | 0.0  | 99.8 | 0.0  | 0.0 | 0.0  | 0.0 | 0.0  | 0.0 | 0.0   | 0.0   | 0.0   | 0.0 |
| -                  | 0.1         | 0.1  | 0.1  | 0.1  | 0.1  | 0.1  | 0.2  | 0.4  | 0.2  | 0.2  | 0.2 | 0.2  | 0.2 | 0.2  | 0.1  | 0.1  | 0.1 | 0.1  | 0.1 | 0.1  | 0.1 | 0.0   | 0.0   | 0.0   | 0.0 |

  

| evoA1_sEBE-T2A+Rap | Replicate 2 | PAM   |      |      |      |      |      |      |      |      |     |      |     |      |      |      |     |       |     |       |     |       |      |      |     |
|--------------------|-------------|-------|------|------|------|------|------|------|------|------|-----|------|-----|------|------|------|-----|-------|-----|-------|-----|-------|------|------|-----|
|                    |             | I     | C    | T    | G    | C    | A    | G    | G    | C    | A   | A    | G   | T    | C    | A    | T   | G     | A   | G     | A   | G     | A    | G    | G   |
| A                  | 0.1         | 0.0   | 0.0  | 0.3  | 99.8 | 0.0  | 0.0  | 0.2  | 99.9 | 99.8 | 0.0 | 0.0  | 0.0 | 0.0  | 99.8 | 0.0  | 0.0 | 99.9  | 0.0 | 99.9  | 0.0 | 100.0 | 0.0  | 0.0  | 0.1 |
| C                  | 89.2        | 0.0   | 0.0  | 63.9 | 0.0  | 0.0  | 0.0  | 68.1 | 0.0  | 0.0  | 0.0 | 0.0  | 0.0 | 94.8 | 0.0  | 0.0  | 0.0 | 0.0   | 0.0 | 0.1   | 0.0 | 0.0   | 0.0  | 0.0  | 0.0 |
| G                  | 0.0         | 0.0   | 99.9 | 0.2  | 0.1  | 99.8 | 99.8 | 1.1  | 0.0  | 0.0  | 0.0 | 99.8 | 0.0 | 0.0  | 0.0  | 99.9 | 0.1 | 100.0 | 0.0 | 100.0 | 0.0 | 100.0 | 99.9 | 99.9 |     |
| T                  | 10.7        | 100.0 | 0.0  | 35.5 | 0.0  | 0.0  | 0.0  | 30.3 | 0.0  | 0.0  | 0.0 | 99.8 | 5.0 | 0.0  | 99.9 | 0.0  | 0.0 | 0.0   | 0.0 | 0.0   | 0.0 | 0.0   | 0.0  | 0.0  | 0.0 |
| -                  | 0.1         | 0.0   | 0.1  | 0.1  | 0.1  | 0.2  | 0.2  | 0.3  | 0.1  | 0.2  | 0.2 | 0.2  | 0.2 | 0.2  | 0.1  | 0.1  | 0.1 | 0.0   | 0.0 | 0.0   | 0.0 | 0.0   | 0.0  | 0.0  | 0.0 |

  

| evoA1_sEBE-T2A+Rap | Replicate 3 | PAM   |      |       |       |      |      |      |      |       |      |     |      |      |      |      |      |      |      |      |      |      |      |      |     |
|--------------------|-------------|-------|------|-------|-------|------|------|------|------|-------|------|-----|------|------|------|------|------|------|------|------|------|------|------|------|-----|
|                    |             | I     | C    | T     | G     | C    | A    | G    | G    | C     | A    | A   | G    | T    | C    | A    | T    | G    | A    | G    | A    | G    | A    | G    | G   |
| A                  | 0.0         | 0.0   | 0.1  | 0.0   | 0.0   | 0.0  | 0.5  | 1.8  | 0.4  | 0.0   | 99.9 | 0.0 | 0.0  | 0.0  | 1.3  | 0.1  | 37.8 | 0.0  | 0.0  | 38.9 | 99.9 | 99.9 | 99.9 | 99.9 |     |
| C                  | 99.9        | 100.0 | 99.9 | 0.0   | 100.0 | 0.0  | 0.0  | 0.0  | 0.0  | 100.0 | 0.0  | 0.0 | 0.0  | 99.9 | 0.0  | 0.0  | 0.0  | 0.1  | 99.9 | 0.0  | 0.0  | 0.1  | 0.0  | 0.0  | 0.0 |
| G                  | 0.0         | 0.0   | 0.0  | 100.0 | 0.0   | 0.0  | 99.5 | 98.1 | 99.5 | 0.0   | 0.0  | 0.0 | 0.0  | 0.0  | 0.0  | 98.7 | 0.0  | 62.0 | 0.0  | 0.1  | 61.1 | 0.0  | 0.0  | 0.0  | 0.0 |
| T                  | 0.0         | 0.0   | 0.0  | 0.0   | 0.0   | 99.9 | 0.0  | 0.0  | 0.1  | 0.0   | 0.0  | 0.0 | 99.9 | 0.0  | 99.9 | 0.0  | 99.9 | 0.0  | 0.0  | 99.8 | 0.0  | 0.0  | 0.0  | 0.0  | 0.0 |
| -                  | 0.0         | 0.0   | 0.0  | 0.0   | 0.0   | 0.1  | 0.0  | 0.0  | 0.0  | 0.0   | 0.0  | 0.0 | 0.0  | 0.0  | 0.1  | 0.1  | 0.1  | 0.1  | 0.1  | 0.1  | 0.1  | 0.0  | 0.0  | 0.0  | 0.0 |

  

| evoA1_sEBE-T2A+Rap | Replicate 1 | PAM  |      |      |      |       |      |      |      |      |     |       |     |      |       |     |       |     |      |     |       |     |      |       |       |
|--------------------|-------------|------|------|------|------|-------|------|------|------|------|-----|-------|-----|------|-------|-----|-------|-----|------|-----|-------|-----|------|-------|-------|
|                    |             | I    | C    | T    | G    | C     | A    | G    | G    | C    | A   | A     | G   | T    | C     | A   | T     | G   | A    | G   | A     | G   | A    | G     | G     |
| A                  | 0.0         | 0.0  | 0.1  | 0.0  | 99.9 | 0.0   | 0.0  | 0.0  | 99.9 | 99.9 | 0.0 | 0.0   | 0.1 | 99.9 | 0.0   | 0.0 | 99.9  | 0.1 | 99.8 | 0.0 | 100.0 | 0.0 | 0.0  | 0.0   | 0.0   |
| C                  | 99.0        | 0.0  | 0.0  | 93.2 | 0.0  | 0.0   | 0.0  | 95.9 | 0.0  | 0.0  | 0.0 | 0.0   | 0.0 | 99.7 | 0.0   | 0.0 | 0.0   | 0.0 | 0.0  | 0.1 | 0.0   | 0.0 | 0.0  | 0.0   | 0.0   |
| G                  | 0.0         | 0.0  | 99.9 | 0.0  | 0.0  | 100.0 | 99.9 | 0.1  | 0.0  | 0.0  | 0.0 | 100.0 | 0.0 | 0.0  | 0.0   | 0.0 | 100.0 | 0.0 | 99.9 | 0.0 | 100.0 | 0.0 | 99.9 | 100.0 | 100.0 |
| T                  | 0.9         | 99.9 | 0.0  | 6.8  | 0.0  | 0.0   | 0.1  | 4.0  | 0.0  | 0.1  | 0.0 | 100.0 | 0.3 | 0.0  | 100.0 | 0.0 | 0.0   | 0.0 | 0.0  | 0.0 | 0.0   | 0.0 | 0.0  | 0.0   | 0.0   |
| -                  | 0.0         | 0.0  | 0.0  | 0.0  | 0.0  | 0.0   | 0.0  | 0.0  | 0.0  | 0.0  | 0.0 | 0.0   | 0.0 | 0.0  | 0.0   | 0.0 | 0.0   | 0.0 | 0.0  | 0.0 | 0.0   | 0.0 | 0.0  | 0.0   | 0.0   |

  

| evoA1_sEBE-T2A+Rap | Replicate 2 | PAM   |       |      |      |       |      |      |      |      |     |       |     |      |       |     |       |      |       |      |       |       |      |      |     |
|--------------------|-------------|-------|-------|------|------|-------|------|------|------|------|-----|-------|-----|------|-------|-----|-------|------|-------|------|-------|-------|------|------|-----|
|                    |             | I     | C     | T    | G    | C     | A    | G    | G    | C    | A   | A     | G   | T    | C     | A   | T     | G    | A     | G    | A     | G     | A    | G    | G   |
| A                  | 0.0         | 0.0   | 0.0   | 0.0  | 99.9 | 0.0   | 0.0  | 0.0  | 99.9 | 99.9 | 0.0 | 0.0   | 0.0 | 0.0  | 99.9  | 0.0 | 0.0   | 99.9 | 0.0   | 99.8 | 0.0   | 100.0 | 0.0  | 0.0  | 0.0 |
| C                  | 98.8        | 0.0   | 0.0   | 91.9 | 0.0  | 0.0   | 0.0  | 95.1 | 0.0  | 0.0  | 0.0 | 0.0   | 0.0 | 99.6 | 0.0   | 0.0 | 0.0   | 0.0  | 0.0   | 0.1  | 0.0   | 0.0   | 0.0  | 0.0  | 0.0 |
| G                  | 0.0         | 0.0   | 100.0 | 0.0  | 0.0  | 100.0 | 99.9 | 0.0  | 0.0  | 0.0  | 0.0 | 100.0 | 0.0 | 0.0  | 0.0   | 0.0 | 100.0 | 0.0  | 100.0 | 0.0  | 100.0 | 0.0   | 99.9 | 99.9 |     |
| T                  | 1.2         | 100.0 | 0.0   | 8.0  | 0.0  | 0.0   | 0.1  | 4.9  | 0.0  | 0.0  | 0.0 | 100.0 | 0.4 | 0.0  | 100.0 | 0.0 | 0.0   | 0.0  | 0.0   | 0.0  | 0.0   | 0.0   | 0.0  | 0.1  |     |
| -                  | 0.0         | 0.0   | 0.0   | 0.0  | 0.0  | 0.0   | 0.0  | 0.0  | 0.0  | 0.0  | 0.0 | 0.0   | 0.0 | 0.0  | 0.0   | 0.0 | 0.0   | 0.0  | 0.0   | 0.0  | 0.0   | 0.0   | 0.0  | 0.0  | 0.0 |

  

| evoA1_sEBE-T2A+Rap | Replicate 3 | PAM |     |      |      |     |     |      |      |      |     |     |     |      |      |     |     |      |     |      |     |       |     |     |     |
|--------------------|-------------|-----|-----|------|------|-----|-----|------|------|------|-----|-----|-----|------|------|-----|-----|------|-----|------|-----|-------|-----|-----|-----|
|                    |             | I   | C   | T    | G    | C   | A   | G    | G    | C    | A   | A   | G   | T    | C    | A   | T   | G    | A   | G    | A   | G     | A   | G   | G   |
| A                  | 0.0         | 0.0 | 0.0 | 0.0  | 99.9 | 0.0 | 0.0 | 0.0  | 99.9 | 99.9 | 0.0 | 0.0 | 0.0 | 0.0  | 99.9 | 0.0 | 0.0 | 99.9 | 0.0 | 99.8 | 0.0 | 100.0 | 0.0 | 0.0 | 0.0 |
| C                  | 98.8        | 0.0 | 0.0 | 91.9 | 0.0  | 0.0 | 0.0 | 95.1 | 0.0  | 0.0  | 0.0 | 0.0 | 0.0 | 99.6 | 0    |     |     |      |     |      |     |       |     |     |     |

# Supplementary Figure 1

| <b>c</b>                         |     | <b>IDHI R132H</b> |       |       |       |       |       |       |       |       |       |      |       |       |       |       |       |      |      |       |       |      |       |       |      |     |
|----------------------------------|-----|-------------------|-------|-------|-------|-------|-------|-------|-------|-------|-------|------|-------|-------|-------|-------|-------|------|------|-------|-------|------|-------|-------|------|-----|
|                                  |     | P127              |       |       | I128  |       |       | I129  |       |       | I130  |      |       | G131  |       |       | R132  |      |      | H133  |       |      | A134  |       |      |     |
|                                  |     | C                 | C     | T     | A     | T     | C     | A     | T     | C     | A     | T    | A     | G     | G     | T     | C     | G    | T    | C     | A     | T    | G     | C     |      |     |
| untreated                        | A   | 0.0               | 0.0   | 0.0   | 100.0 | 0.0   | 0.0   | 100.0 | 0.0   | 0.0   | 100.0 | 0.0  | 100.0 | 0.0   | 0.0   | 0.0   | 0.0   | 0.0  | 0.0  | 0.0   | 0.0   | 0.0  | 0.0   | 0.0   | 0.0  |     |
|                                  | C   | 100.0             | 99.9  | 0.0   | 0.0   | 0.0   | 100.0 | 0.0   | 0.0   | 100.0 | 0.0   | 0.0  | 0.0   | 0.0   | 0.0   | 0.0   | 99.9  | 0.0  | 0.0  | 100.0 | 0.0   | 0.0  | 0.0   | 99.9  | 0.0  |     |
|                                  | G   | 0.0               | 0.0   | 0.0   | 0.0   | 0.0   | 0.0   | 0.0   | 0.0   | 0.0   | 0.0   | 0.4  | 0.0   | 100.0 | 100.0 | 0.0   | 0.0   | 99.9 | 0.5  | 0.0   | 0.0   | 0.4  | 100.0 | 0.0   | 0.0  |     |
|                                  | T   | 0.0               | 0.0   | 100.0 | 0.0   | 100.0 | 0.0   | 0.0   | 100.0 | 0.0   | 0.0   | 99.6 | 0.0   | 0.0   | 0.0   | 100.0 | 0.0   | 0.0  | 99.4 | 0.0   | 0.0   | 99.6 | 0.0   | 0.0   | 99.6 | 0.0 |
|                                  | -   | 0.0               | 0.0   | 0.0   | 0.0   | 0.0   | 0.0   | 0.0   | 0.0   | 0.0   | 0.0   | 0.0  | 0.0   | 0.0   | 0.0   | 0.0   | 0.0   | 0.0  | 0.0  | 0.0   | 0.0   | 0.0  | 0.0   | 0.0   | 0.0  | 0.0 |
| evoA1-seBE: Replicate 1          |     | PAM               |       |       | 20    |       |       | 15    |       |       | 10    |      |       | 5     |       |       | 1     |      |      |       |       |      |       |       |      |     |
|                                  |     | C                 | C     | T     | A     | T     | C     | A     | T     | C     | A     | T    | A     | G     | G     | T     | C     | G    | T    | C     | A     | T    | G     | C     |      |     |
|                                  | A   | 0.0               | 0.0   | 0.0   | 100.0 | 0.0   | 0.0   | 98.6  | 0.0   | 0.0   | 98.4  | 0.0  | 97.0  | 23.9  | 0.7   | 0.0   | 0.0   | 7.4  | 0.0  | 0.0   | 97.6  | 0.0  | 30.3  | 0.1   |      |     |
|                                  | C   | 99.9              | 99.9  | 0.0   | 0.0   | 0.0   | 99.9  | 0.0   | 0.0   | 98.6  | 0.0   | 0.0  | 0.0   | 0.6   | 0.0   | 0.0   | 96.4  | 0.0  | 0.0  | 97.2  | 0.0   | 0.0  | 0.3   | 98.7  |      |     |
|                                  | G   | 0.0               | 0.0   | 0.0   | 0.0   | 0.0   | 0.0   | 0.1   | 0.0   | 0.0   | 0.0   | 0.0  | 0.1   | 71.8  | 95.8  | 0.0   | 0.0   | 89.8 | 0.0  | 0.0   | 0.0   | 0.0  | 67.6  | 0.1   |      |     |
| -                                | 0.0 | 0.0               | 0.0   | 0.0   | 0.0   | 0.0   | 0.1   | 1.3   | 1.3   | 1.5   | 1.7   | 2.9  | 3.4   | 3.4   | 3.5   | 2.8   | 2.8   | 2.0  | 2.7  | 2.3   | 2.3   | 1.5  | 0.9   |       |      |     |
| evoA1-seBE: Replicate 2          |     | C                 | C     | T     | A     | T     | C     | A     | T     | C     | A     | T    | A     | G     | G     | T     | C     | G    | T    | C     | A     | T    | G     | C     |      |     |
|                                  | A   | 0.0               | 0.0   | 0.0   | 99.9  | 0.0   | 0.0   | 99.0  | 0.1   | 0.0   | 98.8  | 0.0  | 97.9  | 21.4  | 0.6   | 0.0   | 0.0   | 6.0  | 0.0  | 0.0   | 98.0  | 0.0  | 24.6  | 0.1   |      |     |
|                                  | C   | 99.9              | 99.9  | 0.0   | 0.0   | 0.0   | 99.8  | 0.0   | 0.1   | 99.1  | 0.0   | 0.0  | 0.0   | 0.5   | 0.0   | 0.0   | 97.3  | 0.0  | 0.0  | 97.9  | 0.0   | 0.0  | 0.4   | 98.6  |      |     |
|                                  | G   | 0.0               | 0.0   | 0.0   | 0.0   | 0.0   | 0.0   | 0.0   | 0.0   | 0.0   | 0.0   | 0.0  | 0.0   | 75.2  | 96.7  | 0.0   | 0.0   | 91.9 | 0.0  | 0.0   | 0.0   | 0.0  | 73.5  | 0.0   |      |     |
|                                  | -   | 0.0               | 0.0   | 0.0   | 0.0   | 0.0   | 0.0   | 0.1   | 0.9   | 0.8   | 1.1   | 1.2  | 2.0   | 2.6   | 2.7   | 2.7   | 2.6   | 2.1  | 2.1  | 2.0   | 1.9   | 1.8  | 1.3   | 1.0   |      |     |
| evoA1-seBE: Replicate 3          |     | C                 | C     | T     | A     | T     | C     | A     | T     | C     | A     | T    | A     | G     | G     | T     | C     | G    | T    | C     | A     | T    | G     | C     |      |     |
|                                  | A   | 0.0               | 0.0   | 0.0   | 99.9  | 0.0   | 0.0   | 98.8  | 0.0   | 0.0   | 98.6  | 0.0  | 97.4  | 21.5  | 0.8   | 0.0   | 0.0   | 5.9  | 0.0  | 0.0   | 97.7  | 0.0  | 25.3  | 0.1   |      |     |
|                                  | C   | 100.0             | 99.9  | 0.0   | 0.0   | 0.0   | 99.9  | 0.1   | 0.1   | 98.8  | 0.0   | 0.0  | 0.1   | 0.7   | 0.1   | 0.1   | 96.7  | 0.0  | 0.1  | 97.4  | 0.0   | 0.0  | 0.4   | 98.8  |      |     |
|                                  | G   | 0.0               | 0.0   | 0.0   | 0.0   | 0.0   | 0.0   | 0.1   | 0.0   | 0.0   | 0.0   | 0.0  | 0.0   | 74.6  | 96.0  | 0.1   | 0.0   | 91.3 | 0.1  | 0.0   | 0.0   | 0.0  | 72.9  | 0.1   |      |     |
|                                  | -   | 0.0               | 0.0   | 0.0   | 0.0   | 0.0   | 0.0   | 1.1   | 1.1   | 1.2   | 1.4   | 1.4  | 2.5   | 3.0   | 3.1   | 3.1   | 3.2   | 2.6  | 2.5  | 2.5   | 2.2   | 2.2  | 1.1   | 0.7   |      |     |
| evoA1-seBE: T2A +Rap Replicate 1 |     | PAM               |       |       | 20    |       |       | 15    |       |       | 10    |      |       | 5     |       |       | 1     |      |      |       |       |      |       |       |      |     |
|                                  |     | C                 | C     | T     | A     | T     | C     | A     | T     | C     | A     | T    | A     | G     | G     | T     | C     | G    | T    | C     | A     | T    | G     | C     |      |     |
|                                  | A   | 0.0               | 0.0   | 0.0   | 100.0 | 0.0   | 0.0   | 99.2  | 0.0   | 0.0   | 98.9  | 0.0  | 98.2  | 18.5  | 0.3   | 0.0   | 0.0   | 7.4  | 0.1  | 0.0   | 98.8  | 0.0  | 26.5  | 0.1   |      |     |
|                                  | C   | 100.0             | 99.9  | 0.0   | 0.0   | 0.0   | 99.9  | 0.0   | 0.0   | 99.2  | 0.0   | 0.0  | 0.0   | 0.2   | 0.0   | 0.0   | 98.0  | 0.0  | 0.0  | 98.6  | 0.0   | 0.0  | 0.2   | 99.1  |      |     |
|                                  | -   | 0.0               | 0.0   | 0.0   | 0.0   | 0.0   | 0.1   | 0.7   | 0.6   | 0.7   | 1.0   | 1.1  | 1.7   | 2.0   | 2.0   | 2.0   | 2.0   | 1.4  | 1.4  | 1.3   | 1.2   | 1.2  | 0.8   | 0.6   |      |     |
| evoA1-seBE: T2A +Rap Replicate 2 |     | C                 | C     | T     | A     | T     | C     | A     | T     | C     | A     | T    | A     | G     | G     | T     | C     | G    | T    | C     | A     | T    | G     | C     |      |     |
|                                  | A   | 0.0               | 0.0   | 0.0   | 100.0 | 0.0   | 0.0   | 99.5  | 0.0   | 0.0   | 99.3  | 0.0  | 98.6  | 13.6  | 0.3   | 0.0   | 0.0   | 5.2  | 0.1  | 0.0   | 99.0  | 0.0  | 18.7  | 0.1   |      |     |
|                                  | C   | 99.9              | 100.0 | 0.1   | 0.0   | 0.0   | 99.9  | 0.0   | 0.0   | 99.4  | 0.0   | 0.0  | 0.1   | 0.1   | 0.0   | 0.0   | 98.5  | 0.0  | 0.1  | 98.9  | 0.0   | 0.0  | 0.2   | 99.6  |      |     |
|                                  | G   | 0.0               | 0.0   | 0.0   | 0.0   | 0.0   | 0.0   | 0.0   | 0.0   | 0.0   | 0.0   | 0.0  | 0.0   | 84.7  | 98.2  | 0.0   | 0.0   | 93.6 | 0.0  | 0.0   | 0.0   | 0.0  | 80.5  | 0.0   |      |     |
|                                  | -   | 0.0               | 0.0   | 0.0   | 0.0   | 0.0   | 0.0   | 0.5   | 0.5   | 0.6   | 0.7   | 0.8  | 1.3   | 1.5   | 1.5   | 1.5   | 1.5   | 1.1  | 1.1  | 1.1   | 0.9   | 0.9  | 0.5   | 0.3   |      |     |
| evoA1-seBE: T2A +Rap Replicate 3 |     | C                 | C     | T     | A     | T     | C     | A     | T     | C     | A     | T    | A     | G     | G     | T     | C     | G    | T    | C     | A     | T    | G     | C     |      |     |
|                                  | A   | 0.0               | 0.0   | 0.0   | 100.0 | 0.0   | 0.0   | 99.3  | 0.0   | 0.0   | 99.2  | 0.0  | 98.4  | 15.9  | 0.5   | 0.0   | 0.0   | 6.8  | 0.0  | 0.0   | 98.9  | 0.0  | 22.6  | 0.0   |      |     |
|                                  | C   | 100.0             | 100.0 | 0.0   | 0.0   | 0.0   | 99.9  | 0.0   | 0.0   | 99.2  | 0.0   | 0.0  | 0.1   | 0.1   | 0.0   | 0.0   | 98.3  | 0.0  | 0.0  | 98.7  | 0.0   | 0.0  | 0.1   | 99.4  |      |     |
|                                  | G   | 0.0               | 0.0   | 0.0   | 0.0   | 0.0   | 0.0   | 0.1   | 0.0   | 0.0   | 0.0   | 0.0  | 0.0   | 82.2  | 97.7  | 0.0   | 0.0   | 91.8 | 0.0  | 0.0   | 0.0   | 0.0  | 76.8  | 0.0   |      |     |
|                                  | -   | 0.0               | 0.0   | 0.0   | 0.0   | 0.0   | 0.1   | 0.6   | 0.7   | 0.7   | 0.8   | 0.8  | 1.5   | 1.8   | 1.8   | 1.8   | 1.7   | 1.3  | 1.3  | 1.2   | 1.1   | 1.1  | 0.5   | 0.3   |      |     |
| evoA1-seBE: T2A +Rap Replicate 1 |     | PAM               |       |       | 20    |       |       | 15    |       |       | 10    |      |       | 5     |       |       | 1     |      |      |       |       |      |       |       |      |     |
|                                  |     | C                 | C     | T     | A     | T     | C     | A     | T     | C     | A     | T    | A     | G     | G     | T     | C     | G    | T    | C     | A     | T    | G     | C     |      |     |
|                                  | A   | 0.0               | 0.0   | 0.0   | 100.0 | 0.0   | 0.0   | 100.0 | 0.0   | 0.0   | 100.0 | 0.0  | 100.0 | 0.9   | 0.1   | 0.0   | 0.0   | 0.4  | 0.0  | 0.0   | 100.0 | 0.0  | 1.9   | 0.0   |      |     |
|                                  | C   | 100.0             | 100.0 | 0.0   | 0.0   | 0.0   | 100.0 | 0.0   | 0.0   | 100.0 | 0.0   | 0.0  | 0.0   | 0.0   | 0.0   | 0.0   | 100.0 | 0.0  | 0.0  | 99.9  | 0.0   | 0.0  | 0.0   | 100.0 |      |     |
|                                  | -   | 0.0               | 0.0   | 0.0   | 0.0   | 0.0   | 0.0   | 0.0   | 0.0   | 0.0   | 0.0   | 0.0  | 0.0   | 0.0   | 0.0   | 0.0   | 0.0   | 0.0  | 0.0  | 0.0   | 0.0   | 0.0  | 0.0   | 0.0   |      |     |
| evoA1-seBE: T2A +Rap Replicate 2 |     | C                 | C     | T     | A     | T     | C     | A     | T     | C     | A     | T    | A     | G     | G     | T     | C     | G    | T    | C     | A     | T    | G     | C     |      |     |
|                                  | A   | 0.0               | 0.0   | 0.0   | 99.9  | 0.0   | 0.0   | 100.0 | 0.0   | 0.0   | 100.0 | 0.0  | 99.9  | 0.6   | 0.0   | 0.0   | 0.0   | 0.2  | 0.0  | 0.0   | 99.9  | 0.0  | 1.3   | 0.0   |      |     |
|                                  | C   | 100.0             | 100.0 | 0.0   | 0.0   | 0.0   | 100.0 | 0.0   | 0.0   | 100.0 | 0.0   | 0.0  | 0.0   | 0.0   | 0.0   | 0.0   | 99.9  | 0.0  | 0.0  | 99.9  | 0.0   | 0.0  | 0.0   | 100.0 |      |     |
|                                  | G   | 0.0               | 0.0   | 0.0   | 0.0   | 0.0   | 0.0   | 0.0   | 0.0   | 0.0   | 0.0   | 0.0  | 0.0   | 99.4  | 99.9  | 0.0   | 0.0   | 99.8 | 0.0  | 0.0   | 0.0   | 0.0  | 98.7  | 0.0   |      |     |
|                                  | -   | 0.0               | 0.0   | 0.0   | 0.0   | 0.0   | 0.0   | 0.0   | 0.0   | 0.0   | 0.0   | 0.0  | 0.0   | 0.0   | 0.0   | 0.0   | 0.0   | 0.0  | 0.0  | 0.0   | 0.0   | 0.0  | 0.0   | 0.0   |      |     |
| evoA1-seBE: T2A +Rap Replicate 3 |     | C                 | C     | T     | A     | T     | C     | A     | T     | C     | A     | T    | A     | G     | G     | T     | C     | G    | T    | C     | A     | T    | G     | C     |      |     |
|                                  | A   | 0.0               | 0.0   | 0.0   | 100.0 | 0.0   | 0.0   | 99.9  | 0.0   | 0.0   | 100.0 | 0.0  | 99.9  | 0.9   | 0.0   | 0.0   | 0.0   | 0.2  | 0.0  | 0.0   | 99.9  | 0.0  | 1.5   | 0.0   |      |     |
|                                  | C   | 99.9              | 100.0 | 0.0   | 0.0   | 0.0   | 100.0 | 0.0   | 0.0   | 99.9  | 0.0   | 0.0  | 0.0   | 0.0   | 0.0   | 0.0   | 100.0 | 0.0  | 0.1  | 100.0 | 0.0   | 0.0  | 0.0   | 100.0 |      |     |
|                                  | G   | 0.0               | 0.0   | 0.0   | 0.0   | 0.0   | 0.0   | 0.0   | 0.0   | 0.0   | 0.0   | 0.0  | 0.0   | 99.1  | 100.0 | 0.0   | 0.0   | 99.8 | 0.0  | 0.0   | 0.0   | 0.0  | 98.5  | 0.0   |      |     |
|                                  | -   | 0.0               | 0.0   | 0.0   | 0.0   | 0.0   | 0.0   | 0.1   | 0.1   | 0.1   | 0.1   | 0.1  | 0.0   | 0.0   | 0.0   | 0.0   | 0.0   | 0.0  | 0.0  | 0.0   | 0.0   | 0.0  | 0.1   | 0.0   |      |     |

# Supplementary Figure 1

**d** *TDG Q51\**

|           | P49 |       |       |       | A/T50 |       |       | Q51   |     |       | E52   |       |     | P53   |       |     | V54 |      |       | Q55   |     |     |     |       |     |     |     |       |       |     |     |     |     |
|-----------|-----|-------|-------|-------|-------|-------|-------|-------|-----|-------|-------|-------|-----|-------|-------|-----|-----|------|-------|-------|-----|-----|-----|-------|-----|-----|-----|-------|-------|-----|-----|-----|-----|
|           | C   | C     | T     | G     | C     | T     | C     | A     | G   | G     | A     | A     | C   | C     | A     | G   | T   | G    | C     | A     | A   | G   | G   |       |     |     |     |       |       |     |     |     |     |
| untreated | A   | 0.0   | 0.0   | 0.0   | 0.0   | 0.0   | 0.0   | 99.9  | 0.0 | 0.0   | 100.0 | 100.0 | 0.0 | 0.0   | 100.0 | 0.0 | 0.0 | 0.0  | 100.0 | 0.0   | 0.0 | 0.0 | 0.0 | 0.0   | 0.0 | 0.0 | 0.0 | 0.0   | 0.0   | 0.0 | 0.0 | 0.0 |     |
|           | C   | 100.0 | 100.0 | 0.0   | 0.0   | 100.0 | 0.0   | 100.0 | 0.0 | 0.0   | 0.0   | 0.0   | 0.0 | 100.0 | 100.0 | 0.0 | 0.0 | 0.0  | 0.0   | 0.0   | 0.0 | 0.0 | 0.0 | 100.0 | 0.0 | 0.0 | 0.0 | 0.0   | 0.0   | 0.0 | 0.0 | 0.0 |     |
|           | G   | 0.0   | 0.0   | 0.0   | 67.3  | 0.0   | 0.0   | 0.0   | 0.1 | 100.0 | 100.0 | 0.0   | 0.0 | 0.0   | 0.0   | 0.0 | 0.0 | 99.9 | 0.0   | 100.0 | 0.0 | 0.0 | 0.0 | 0.0   | 0.0 | 0.0 | 0.0 | 100.0 | 100.0 | 0.0 | 0.0 | 0.0 |     |
|           | T   | 0.0   | 0.0   | 100.0 | 32.7  | 0.0   | 100.0 | 0.0   | 0.0 | 0.0   | 0.0   | 0.0   | 0.0 | 0.0   | 0.0   | 0.0 | 0.0 | 0.0  | 100.0 | 0.0   | 0.0 | 0.0 | 0.0 | 0.0   | 0.0 | 0.0 | 0.0 | 0.0   | 0.0   | 0.0 | 0.0 | 0.0 | 0.0 |
|           | -   | 0.0   | 0.0   | 0.0   | 0.0   | 0.0   | 0.0   | 0.0   | 0.0 | 0.0   | 0.0   | 0.0   | 0.0 | 0.0   | 0.0   | 0.0 | 0.0 | 0.0  | 0.0   | 0.0   | 0.0 | 0.0 | 0.0 | 0.0   | 0.0 | 0.0 | 0.0 | 0.0   | 0.0   | 0.0 | 0.0 | 0.0 | 0.0 |

  

|                           | 1 |      |      |      | 5    |      |      | 10   |      |      | 15   |      |      | 20   |     |      | PAM |      |      |       |       |      |       |
|---------------------------|---|------|------|------|------|------|------|------|------|------|------|------|------|------|-----|------|-----|------|------|-------|-------|------|-------|
|                           | C | C    | T    | G    | C    | T    | C    | A    | G    | G    | A    | A    | C    | C    | A   | G    | T   | G    | C    | A     | A     | G    | G     |
| evoA1-seBE<br>Replicate 1 | A | 0.1  | 0.1  | 0.0  | 0.0  | 0.3  | 0.0  | 0.0  | 99.0 | 0.1  | 0.1  | 99.2 | 99.2 | 0.0  | 0.0 | 99.6 | 0.0 | 0.0  | 0.0  | 100.0 | 100.0 | 0.2  | 0.0   |
|                           | C | 82.8 | 58.2 | 0.0  | 0.0  | 47.2 | 0.0  | 47.2 | 0.0  | 0.0  | 0.0  | 0.0  | 99.2 | 96.9 | 0.0 | 0.0  | 0.0 | 0.0  | 99.8 | 0.0   | 0.0   | 0.1  | 0.0   |
|                           | G | 0.0  | 0.1  | 0.0  | 65.9 | 0.4  | 0.0  | 0.3  | 0.0  | 99.1 | 99.0 | 0.0  | 0.0  | 0.0  | 0.0 | 99.6 | 0.0 | 99.9 | 0.0  | 0.0   | 0.0   | 99.7 | 100.0 |
|                           | T | 16.8 | 41.1 | 99.6 | 33.6 | 51.6 | 99.1 | 51.4 | 0.0  | 0.0  | 0.0  | 0.0  | 0.0  | 0.0  | 2.5 | 0.0  | 0.0 | 99.7 | 0.0  | 0.2   | 0.0   | 0.0  | 0.0   |
|                           | - | 0.2  | 0.5  | 0.4  | 0.5  | 0.6  | 0.9  | 1.1  | 0.0  | 0.8  | 0.9  | 0.8  | 0.8  | 0.7  | 0.6 | 0.4  | 0.3 | 0.3  | 0.0  | 0.0   | 0.0   | 0.0  | 0.0   |

  

|                           | 1 |      |      |      | 5    |      |      | 10   |      |      | 15   |      |      | 20   |     |      | PAM  |      |      |       |       |     |      |      |
|---------------------------|---|------|------|------|------|------|------|------|------|------|------|------|------|------|-----|------|------|------|------|-------|-------|-----|------|------|
|                           | C | C    | T    | G    | C    | T    | C    | A    | G    | G    | A    | A    | C    | C    | A   | G    | T    | G    | C    | A     | A     | G   | G    |      |
| evoA1-seBE<br>Replicate 2 | A | 0.0  | 0.1  | 0.0  | 0.0  | 0.1  | 0.0  | 0.1  | 99.4 | 0.2  | 0.0  | 99.5 | 99.5 | 0.0  | 0.0 | 99.7 | 0.0  | 0.0  | 0.0  | 100.0 | 100.0 | 0.2 | 0.0  |      |
|                           | C | 83.9 | 61.7 | 0.0  | 0.0  | 51.8 | 0.0  | 52.0 | 0.0  | 0.0  | 0.0  | 0.0  | 99.5 | 96.3 | 0.0 | 0.0  | 0.0  | 0.0  | 99.7 | 0.0   | 0.0   | 0.0 | 0.0  |      |
|                           | G | 0.0  | 0.0  | 0.0  | 65.8 | 0.4  | 0.0  | 0.2  | 0.0  | 99.2 | 99.4 | 0.0  | 0.0  | 0.0  | 0.0 | 0.0  | 99.6 | 0.1  | 99.9 | 0.0   | 0.0   | 0.0 | 99.8 | 99.9 |
|                           | T | 15.7 | 37.6 | 99.5 | 32.7 | 46.9 | 99.2 | 46.6 | 0.0  | 0.0  | 0.0  | 0.0  | 0.0  | 0.0  | 3.2 | 0.0  | 0.1  | 99.8 | 0.0  | 0.3   | 0.0   | 0.0 | 0.0  | 0.0  |
|                           | - | 0.3  | 0.5  | 0.5  | 0.4  | 0.8  | 0.8  | 1.2  | 0.6  | 0.6  | 0.5  | 0.5  | 0.5  | 0.5  | 0.4 | 0.2  | 0.2  | 0.1  | 0.0  | 0.0   | 0.0   | 0.0 | 0.0  | 0.0  |

  

|                           | 1 |      |      |      | 5    |      |      | 10   |      |      | 15   |      |      | 20   |     |      | PAM  |      |       |       |       |     |      |       |
|---------------------------|---|------|------|------|------|------|------|------|------|------|------|------|------|------|-----|------|------|------|-------|-------|-------|-----|------|-------|
|                           | C | C    | T    | G    | C    | T    | C    | A    | G    | G    | A    | A    | C    | C    | A   | G    | T    | G    | C     | A     | A     | G   | G    |       |
| evoA1-seBE<br>Replicate 3 | A | 0.1  | 0.1  | 0.0  | 0.0  | 0.1  | 0.0  | 0.1  | 99.3 | 0.1  | 0.1  | 99.4 | 99.4 | 0.0  | 0.0 | 99.6 | 0.0  | 0.0  | 0.0   | 100.0 | 100.0 | 0.4 | 0.0  |       |
|                           | C | 83.8 | 60.9 | 0.0  | 0.0  | 52.2 | 0.0  | 52.4 | 0.0  | 0.0  | 0.0  | 0.0  | 99.4 | 97.3 | 0.0 | 0.0  | 0.0  | 0.0  | 99.9  | 0.0   | 0.0   | 0.0 | 0.0  |       |
|                           | G | 0.1  | 0.0  | 0.0  | 67.1 | 0.6  | 0.0  | 0.2  | 0.0  | 99.1 | 99.3 | 0.0  | 0.0  | 0.0  | 0.0 | 0.0  | 99.6 | 0.1  | 100.0 | 0.0   | 0.0   | 0.0 | 99.6 | 100.0 |
|                           | T | 15.8 | 38.5 | 99.6 | 32.5 | 46.3 | 99.1 | 46.3 | 0.0  | 0.0  | 0.0  | 0.0  | 0.0  | 0.1  | 2.3 | 0.0  | 0.0  | 99.7 | 0.0   | 0.1   | 0.0   | 0.0 | 0.0  | 0.0   |
|                           | - | 0.2  | 0.5  | 0.3  | 0.4  | 0.7  | 0.8  | 1.1  | 0.6  | 0.6  | 0.6  | 0.6  | 0.6  | 0.5  | 0.4 | 0.3  | 0.3  | 0.1  | 0.0   | 0.0   | 0.0   | 0.0 | 0.0  | 0.0   |

  

|                                       | 1 |      |      |      | 5    |      |      | 10   |      |      | 15   |      |      | 20   |     |      | PAM  |       |       |       |       |     |       |       |
|---------------------------------------|---|------|------|------|------|------|------|------|------|------|------|------|------|------|-----|------|------|-------|-------|-------|-------|-----|-------|-------|
|                                       | C | C    | T    | G    | C    | T    | C    | A    | G    | G    | A    | A    | C    | C    | A   | G    | T    | G     | C     | A     | A     | G   | G     |       |
| evoA1-seBE<br>T2A +Rap<br>Replicate 1 | A | 0.2  | 0.0  | 0.0  | 0.0  | 0.0  | 0.0  | 0.0  | 99.7 | 0.0  | 0.0  | 99.6 | 99.7 | 0.0  | 0.0 | 99.8 | 0.0  | 0.0   | 0.0   | 100.0 | 100.0 | 0.0 | 0.0   |       |
|                                       | C | 86.9 | 70.4 | 0.0  | 0.0  | 65.1 | 0.0  | 65.2 | 0.0  | 0.0  | 0.0  | 0.0  | 99.7 | 97.9 | 0.0 | 0.0  | 0.0  | 0.0   | 99.9  | 0.0   | 0.0   | 0.0 | 0.0   |       |
|                                       | G | 0.1  | 0.0  | 0.0  | 67.9 | 0.1  | 0.0  | 0.1  | 0.0  | 99.7 | 99.6 | 0.0  | 0.0  | 0.0  | 0.0 | 0.1  | 99.9 | 0.0   | 100.0 | 0.0   | 0.0   | 0.0 | 100.0 | 100.0 |
|                                       | T | 12.7 | 29.4 | 99.8 | 31.8 | 34.5 | 99.6 | 34.2 | 0.0  | 0.0  | 0.0  | 0.0  | 0.0  | 0.0  | 1.8 | 0.0  | 0.0  | 100.0 | 0.0   | 0.1   | 0.0   | 0.0 | 0.0   | 0.0   |
|                                       | - | 0.1  | 0.2  | 0.2  | 0.2  | 0.3  | 0.3  | 0.5  | 0.3  | 0.3  | 0.4  | 0.4  | 0.3  | 0.3  | 0.2 | 0.1  | 0.1  | 0.0   | 0.0   | 0.0   | 0.0   | 0.0 | 0.0   | 0.0   |

  

|                                       | 1 |      |      |      | 5    |      |      | 10   |      |      | 15   |      |      | 20   |     |      | PAM  |      |       |       |       |     |       |       |
|---------------------------------------|---|------|------|------|------|------|------|------|------|------|------|------|------|------|-----|------|------|------|-------|-------|-------|-----|-------|-------|
|                                       | C | C    | T    | G    | C    | T    | C    | A    | G    | G    | A    | A    | C    | C    | A   | G    | T    | G    | C     | A     | A     | G   | G     |       |
| evoA1-seBE<br>T2A +Rap<br>Replicate 2 | A | 0.0  | 0.1  | 0.0  | 0.0  | 0.1  | 0.0  | 0.0  | 99.8 | 0.1  | 0.0  | 99.7 | 99.8 | 0.0  | 0.0 | 99.9 | 0.0  | 0.0  | 0.0   | 100.0 | 100.0 | 0.0 | 0.0   |       |
|                                       | C | 89.7 | 77.9 | 0.0  | 0.0  | 74.4 | 0.0  | 74.3 | 0.0  | 0.0  | 0.0  | 0.0  | 99.8 | 98.6 | 0.0 | 0.0  | 0.0  | 0.0  | 99.9  | 0.0   | 0.0   | 0.0 | 0.0   |       |
|                                       | G | 0.0  | 0.0  | 0.0  | 66.9 | 0.2  | 0.1  | 0.1  | 0.0  | 99.6 | 99.7 | 0.0  | 0.0  | 0.0  | 0.0 | 0.0  | 99.8 | 0.1  | 100.0 | 0.0   | 0.0   | 0.0 | 100.0 | 100.0 |
|                                       | T | 10.2 | 21.9 | 99.8 | 32.9 | 25.2 | 99.6 | 25.3 | 0.0  | 0.0  | 0.1  | 0.0  | 0.0  | 0.0  | 1.2 | 0.0  | 0.0  | 99.8 | 0.0   | 0.0   | 0.0   | 0.0 | 0.0   | 0.0   |
|                                       | - | 0.1  | 0.1  | 0.1  | 0.1  | 0.2  | 0.2  | 0.3  | 0.2  | 0.2  | 0.3  | 0.2  | 0.2  | 0.2  | 0.1 | 0.1  | 0.1  | 0.0  | 0.0   | 0.0   | 0.0   | 0.0 | 0.0   | 0.0   |

  

|                                       | 1 |      |      |      | 5    |      |      | 10   |      |      | 15   |      |      | 20   |     |       | PAM   |      |       |       |       |     |       |       |
|---------------------------------------|---|------|------|------|------|------|------|------|------|------|------|------|------|------|-----|-------|-------|------|-------|-------|-------|-----|-------|-------|
|                                       | C | C    | T    | G    | C    | T    | C    | A    | G    | G    | A    | A    | C    | C    | A   | G     | T     | G    | C     | A     | A     | G   | G     |       |
| evoA1-seBE<br>T2A +Rap<br>Replicate 3 | A | 0.0  | 0.0  | 0.0  | 0.0  | 0.0  | 0.0  | 0.0  | 99.8 | 0.0  | 0.0  | 99.8 | 99.7 | 0.0  | 0.0 | 100.0 | 0.0   | 0.0  | 0.0   | 100.0 | 100.0 | 0.0 | 0.0   |       |
|                                       | C | 89.6 | 76.5 | 0.0  | 0.0  | 71.0 | 0.0  | 71.4 | 0.0  | 0.0  | 0.0  | 0.0  | 99.7 | 98.5 | 0.0 | 0.0   | 0.0   | 0.0  | 100.0 | 0.0   | 0.0   | 0.0 | 0.0   |       |
|                                       | G | 0.0  | 0.0  | 0.0  | 66.7 | 0.2  | 0.0  | 0.0  | 0.0  | 99.7 | 99.8 | 0.0  | 0.0  | 0.0  | 0.0 | 0.0   | 100.0 | 0.1  | 100.0 | 0.0   | 0.0   | 0.0 | 100.0 | 100.0 |
|                                       | T | 10.2 | 23.2 | 99.9 | 33.2 | 28.6 | 99.8 | 28.4 | 0.0  | 0.0  | 0.0  | 0.0  | 0.0  | 0.0  | 1.4 | 0.0   | 0.0   | 99.9 | 0.0   | 0.0   | 0.0   | 0.0 | 0.0   | 0.0   |
|                                       | - | 0.2  | 0.2  | 0.1  | 0.1  | 0.2  | 0.2  | 0.3  | 0.2  | 0.2  | 0.2  | 0.2  | 0.2  | 0.2  | 0.1 | 0.0   | 0.0   | 0.0  | 0.0   | 0.0   | 0.0   | 0.0 | 0.0   | 0.0   |

  

|                                       | 1 |      |      |       | 5    |      |       | 10   |       |       | 15    |       |       | 20    |      |       | PAM   |       |       |       |       |     |       |       |
|---------------------------------------|---|------|------|-------|------|------|-------|------|-------|-------|-------|-------|-------|-------|------|-------|-------|-------|-------|-------|-------|-----|-------|-------|
|                                       | C | C    | T    | G     | C    | T    | C     | A    | G     | G     | A     | A     | C     | C     | A    | G     | T     | G     | C     | A     | A     | G   | G     |       |
| evoA1-seBE<br>T2A +Rap<br>Replicate 1 | A | 0.1  | 0.0  | 0.0   | 0.0  | 0.0  | 0.0   | 0.0  | 100.0 | 0.0   | 0.0   | 100.0 | 100.0 | 0.0   | 0.0  | 100.0 | 0.0   | 0.0   | 0.0   | 100.0 | 100.0 | 0.0 | 0.0   |       |
|                                       | C | 99.2 | 97.6 | 0.0   | 0.0  | 96.8 | 0.0   | 96.8 | 0.0   | 0.0   | 0.0   | 0.0   | 0.0   | 100.0 | 99.9 | 0.0   | 0.0   | 0.0   | 0.0   | 100.0 | 0.0   | 0.0 | 0.0   |       |
|                                       | G | 0.0  | 0.0  | 0.0   | 65.0 | 0.0  | 0.0   | 0.0  | 0.0   | 100.0 | 100.0 | 0.0   | 0.0   | 0.0   | 0.0  | 0.0   | 100.0 | 0.0   | 100.0 | 0.0   | 0.0   | 0.0 | 100.0 | 100.0 |
|                                       | T | 0.7  | 2.4  | 100.0 | 34.9 | 3.2  | 100.0 | 3.2  | 0.0   | 0.0   | 0.0   | 0.0   | 0.0   | 0.0   | 0.1  | 0.0   | 0.0   | 100.0 | 0.0   | 0.0   | 0.0   | 0.0 | 0.0   | 0.0   |
|                                       | - | 0.0  | 0.0  | 0.0   | 0.0  | 0.0  | 0.0   | 0.0  | 0.0   | 0.0   | 0.0   | 0.0   | 0.0   | 0.0   | 0.0  | 0.0   | 0.0   | 0.0   | 0.0   | 0.0   | 0.0   | 0.0 | 0.0   | 0.0   |

  

|                                       | 1 |      |      |       | 5    |      |      | 10   |       |       | 15   |      |      | 20   |      |      | PAM  |      |       |       |       |     |      |       |
|---------------------------------------|---|------|------|-------|------|------|------|------|-------|-------|------|------|------|------|------|------|------|------|-------|-------|-------|-----|------|-------|
|                                       | C | C    | T    | G     | C    | T    | C    | A    | G     | G     | A    | A    | C    | C    | A    | G    | T    | G    | C     | A     | A     | G   | G    |       |
| evoA1-seBE<br>T2A +Rap<br>Replicate 2 | A | 0.0  | 0.0  | 0.0   | 0.0  | 0.1  | 0.0  | 0.1  | 100.0 | 0.0   | 0.0  | 99.9 | 99.9 | 0.1  | 0.0  | 99.9 | 0.1  | 0.0  | 0.0   | 100.0 | 100.0 | 0.0 | 0.0  |       |
|                                       | C | 99.7 | 97.9 | 0.0   | 0.0  | 97.3 | 0.0  | 97.4 | 0.0   | 0.0   | 0.0  | 0.0  | 0.0  | 99.9 | 99.8 | 0.0  | 0.0  | 0.0  | 0.0   | 100.0 | 0.0   | 0.0 | 0.0  |       |
|                                       | G | 0.0  | 0.0  | 0.0   | 65.7 | 0.0  | 0.1  | 0.0  | 0.0   | 100.0 | 99.9 | 0.0  | 0.1  | 0.0  | 0.0  | 0.0  | 99.9 | 0.1  | 100.0 | 0.0   | 0.0   | 0.0 | 99.9 | 100.0 |
|                                       | T | 0.3  | 2.0  | 100.0 | 34.2 | 2.5  | 99.8 | 2.4  | 0.0   | 0.0   | 0.1  | 0.0  | 0.0  | 0.0  | 0.1  | 0.0  | 0.0  | 99.9 | 0.0   | 0.0   | 0.0   | 0.0 | 0.0  | 0.0   |
|                                       | - | 0.0  | 0.0  | 0.0   | 0.0  | 0.0  | 0.0  | 0.0  | 0.0   | 0.0   | 0.0  | 0.0  | 0.0  | 0.0  | 0.0  | 0.0  | 0.0  | 0.0  | 0.0   | 0.0   | 0.0   | 0.0 | 0.0  | 0.0   |

  

|                                       | 1 |      |      |     | 5   |      |     | 10   |      |     | 15  |       |       | 20  |     |       | PAM |     |     |       |       |     |     |
|---------------------------------------|---|------|------|-----|-----|------|-----|------|------|-----|-----|-------|-------|-----|-----|-------|-----|-----|-----|-------|-------|-----|-----|
|                                       | C | C    | T    | G   | C   | T    | C   | A    | G    | G   | A   | A     | C     | C   | A   | G     | T   | G   | C   | A     | A     | G   | G   |
| evoA1-seBE<br>T2A +Rap<br>Replicate 3 | A | 0.0  | 0.0  | 0.0 | 0.0 | 0.0  | 0.0 | 0.0  | 99.9 | 0.0 | 0.1 | 100.0 | 100.0 | 0.0 | 0.0 | 100.0 | 0.0 | 0.0 | 0.0 | 100.0 | 100.0 | 0.0 | 0.0 |
|                                       | C | 99.4 | 98.2 | 0.0 | 0.0 | 97.7 | 0.0 | 97.7 | 0.0  | 0.0 | 0.0 | 0.0   | 0.0   | 1   |     |       |     |     |     |       |       |     |     |

# Supplementary Figure 1

| <i>e</i>  |     | TDG Q172* |      |      |       |      |      |      |      |      |      |      |     |       |       |      |     |      |       |      |       |      |     |       |      |      |  |  |
|-----------|-----|-----------|------|------|-------|------|------|------|------|------|------|------|-----|-------|-------|------|-----|------|-------|------|-------|------|-----|-------|------|------|--|--|
|           |     | E170      |      |      |       | V171 |      |      |      | Q172 |      |      |     | K173  |       |      |     | N174 |       |      |       | H175 |     |       |      | M176 |  |  |
| untreated |     | T         | G    | A    | G     | G    | T    | C    | C    | A    | G    | C    | T   | G     | A     | A    | C   | C    | A     | T    | A     | T    | G   | G     |      |      |  |  |
|           | A   | 0.0       | 0.0  | 99.8 | 0.0   | 0.0  | 0.0  | 0.0  | 0.0  | 99.9 | 0.0  | 0.0  | 0.0 | 0.0   | 100.0 | 99.9 | 0.0 | 0.0  | 100.0 | 0.0  | 100.0 | 0.0  | 0.0 | 0.0   | 0.0  |      |  |  |
|           | C   | 0.0       | 0.0  | 0.0  | 0.0   | 0.0  | 0.0  | 99.7 | 99.8 | 0.0  | 0.0  | 99.9 | 0.0 | 0.0   | 0.0   | 0.0  | 0.0 | 99.9 | 100.0 | 0.0  | 0.1   | 0.0  | 0.1 | 0.0   | 0.0  |      |  |  |
|           | G   | 0.0       | 99.9 | 0.1  | 100.0 | 99.9 | 0.2  | 0.1  | 0.0  | 0.1  | 99.9 | 0.0  | 0.0 | 99.9  | 0.0   | 0.0  | 0.0 | 0.0  | 0.0   | 0.0  | 0.1   | 0.0  | 0.0 | 100.0 | 99.9 |      |  |  |
|           | T   | 100.0     | 0.0  | 0.0  | 0.0   | 0.0  | 99.8 | 0.2  | 0.2  | 0.0  | 0.0  | 0.0  | 0.0 | 100.0 | 0.0   | 0.0  | 0.1 | 0.0  | 0.0   | 99.9 | 0.0   | 99.9 | 0.0 | 99.9  | 0.1  |      |  |  |
| -         | 0.0 | 0.0       | 0.0  | 0.0  | 0.0   | 0.0  | 0.0  | 0.0  | 0.0  | 0.0  | 0.0  | 0.0  | 0.0 | 0.0   | 0.0   | 0.0  | 0.0 | 0.0  | 0.0   | 0.0  | 0.0   | 0.0  | 0.0 | 0.0   |      |      |  |  |

  

| evoA1-seB:max<br>Replicate 1 |     | I    | G    | A    | G    | G    | T    | C    | C    | A    | G    | G    | C    | T    | G    | A    | A   | C    | C    | A    | T    | A    | T    | G    | G    |
|------------------------------|-----|------|------|------|------|------|------|------|------|------|------|------|------|------|------|------|-----|------|------|------|------|------|------|------|------|
|                              | A   | 0.0  | 0.0  | 99.5 | 0.0  | 0.0  | 0.0  | 0.5  | 0.1  | 99.4 | 0.0  | 0.0  | 0.0  | 0.0  | 99.6 | 99.7 | 0.1 | 0.1  | 99.9 | 0.0  | 99.9 | 0.0  | 99.9 | 0.0  | 0.0  |
|                              | C   | 0.0  | 0.0  | 0.0  | 0.0  | 0.0  | 0.0  | 37.3 | 42.3 | 0.0  | 0.0  | 95.9 | 0.0  | 0.0  | 0.0  | 0.0  | 0.0 | 99.5 | 99.0 | 0.0  | 0.0  | 0.0  | 0.0  | 0.0  | 0.0  |
|                              | G   | 0.0  | 99.5 | 0.0  | 99.5 | 99.5 | 0.0  | 2.4  | 0.1  | 0.1  | 99.5 | 0.1  | 0.0  | 99.6 | 0.0  | 0.0  | 0.0 | 0.1  | 0.0  | 0.0  | 0.0  | 0.0  | 0.0  | 99.9 | 99.9 |
|                              | T   | 99.5 | 0.1  | 0.0  | 0.0  | 0.0  | 99.5 | 59.2 | 57.0 | 0.0  | 0.0  | 3.5  | 99.5 | 0.0  | 0.0  | 0.0  | 0.1 | 0.6  | 0.0  | 99.9 | 0.0  | 99.9 | 0.0  | 99.9 | 0.0  |
| -                            | 0.5 | 0.5  | 0.5  | 0.5  | 0.5  | 0.5  | 0.5  | 0.5  | 0.5  | 0.5  | 0.5  | 0.5  | 0.5  | 0.4  | 0.4  | 0.3  | 0.2 | 0.2  | 0.1  | 0.1  | 0.1  | 0.1  | 0.1  | 0.1  |      |

  

| evoA1-seB:max<br>Replicate 2 |     | C    | C    | T    | G    | C    | T    | C    | A    | G    | G    | A    | A    | C    | C    | A    | G    | T    | G    | C   | A     | A   | G     | G     |      |
|------------------------------|-----|------|------|------|------|------|------|------|------|------|------|------|------|------|------|------|------|------|------|-----|-------|-----|-------|-------|------|
|                              | A   | 0.0  | 0.1  | 99.9 | 0.0  | 0.0  | 0.1  | 0.6  | 0.2  | 99.7 | 0.0  | 0.1  | 0.0  | 0.1  | 99.6 | 99.7 | 0.0  | 0.1  | 99.9 | 0.0 | 100.0 | 0.0 | 0.0   | 0.0   | 0.0  |
|                              | C   | 0.0  | 0.0  | 0.0  | 0.0  | 0.0  | 0.0  | 43.3 | 48.8 | 0.0  | 0.0  | 95.9 | 0.0  | 0.0  | 0.1  | 0.0  | 99.8 | 99.2 | 0.0  | 0.0 | 0.0   | 0.0 | 0.0   | 0.0   |      |
|                              | G   | 0.0  | 99.8 | 0.0  | 99.8 | 99.7 | 0.5  | 2.6  | 0.1  | 0.1  | 99.7 | 0.2  | 0.0  | 99.6 | 0.1  | 0.0  | 0.0  | 0.1  | 0.0  | 0.0 | 0.0   | 0.0 | 0.0   | 100.0 | 99.9 |
|                              | T   | 99.8 | 0.0  | 0.0  | 0.0  | 0.0  | 99.2 | 53.3 | 50.6 | 0.0  | 0.0  | 3.6  | 99.7 | 0.0  | 0.0  | 0.0  | 0.1  | 0.1  | 0.6  | 0.0 | 99.9  | 0.0 | 100.0 | 0.0   | 0.0  |
| -                            | 0.1 | 0.1  | 0.1  | 0.2  | 0.3  | 0.3  | 0.3  | 0.4  | 0.3  | 0.3  | 0.3  | 0.3  | 0.3  | 0.3  | 0.3  | 0.2  | 0.2  | 0.2  | 0.1  | 0.1 | 0.1   | 0.1 | 0.1   | 0.1   |      |

  

| evoA1-seB:max<br>Replicate 3 |     | C    | C    | T    | G    | C    | T    | C    | A    | G    | G    | A    | A    | C    | C    | A    | G    | T    | G    | C    | A    | A    | G   | G    |      |
|------------------------------|-----|------|------|------|------|------|------|------|------|------|------|------|------|------|------|------|------|------|------|------|------|------|-----|------|------|
|                              | A   | 0.0  | 0.0  | 99.6 | 0.1  | 0.0  | 0.1  | 0.5  | 0.2  | 99.7 | 0.0  | 0.0  | 0.0  | 0.1  | 99.7 | 99.7 | 0.0  | 0.0  | 99.8 | 0.0  | 99.9 | 0.0  | 0.0 | 0.0  | 0.0  |
|                              | C   | 0.0  | 0.0  | 0.0  | 0.0  | 0.0  | 0.0  | 42.0 | 47.0 | 0.0  | 0.0  | 95.7 | 0.0  | 0.0  | 0.0  | 0.0  | 99.8 | 99.2 | 0.0  | 0.0  | 0.0  | 0.0  | 0.0 | 0.0  |      |
|                              | G   | 0.0  | 99.5 | 0.0  | 99.5 | 99.6 | 0.3  | 2.4  | 0.1  | 0.0  | 99.7 | 0.1  | 0.0  | 99.6 | 0.0  | 0.0  | 0.0  | 0.0  | 0.0  | 0.0  | 0.0  | 0.0  | 0.0 | 99.9 | 99.9 |
|                              | T   | 99.7 | 0.1  | 0.0  | 0.0  | 0.0  | 99.3 | 54.8 | 52.5 | 0.0  | 0.0  | 3.9  | 99.7 | 0.0  | 0.0  | 0.0  | 0.0  | 0.6  | 0.0  | 99.9 | 0.0  | 99.9 | 0.0 | 0.0  | 0.1  |
| -                            | 0.4 | 0.4  | 0.4  | 0.4  | 0.4  | 0.3  | 0.3  | 0.2  | 0.2  | 0.3  | 0.3  | 0.3  | 0.3  | 0.2  | 0.2  | 0.2  | 0.2  | 0.2  | 0.1  | 0.1  | 0.1  | 0.1  | 0.1 | 0.1  |      |

  

| evoA1-seB: T2A +Rap<br>Replicate 1 |     | I    | G    | A    | G    | G    | T     | C    | C    | A     | G     | G    | C     | T    | G     | A    | A    | C    | C     | A     | T     | A     | T   | G     | G     |
|------------------------------------|-----|------|------|------|------|------|-------|------|------|-------|-------|------|-------|------|-------|------|------|------|-------|-------|-------|-------|-----|-------|-------|
|                                    | A   | 0.0  | 0.0  | 99.9 | 0.0  | 0.0  | 0.0   | 0.0  | 0.0  | 100.0 | 0.0   | 0.0  | 0.0   | 0.0  | 100.0 | 99.9 | 0.2  | 0.1  | 100.0 | 0.0   | 100.0 | 0.0   | 0.0 | 0.0   | 0.0   |
|                                    | C   | 0.0  | 0.0  | 0.0  | 0.0  | 0.0  | 0.0   | 53.2 | 56.9 | 0.0   | 0.0   | 96.6 | 0.0   | 0.0  | 0.0   | 0.0  | 99.7 | 99.0 | 0.0   | 0.0   | 0.0   | 0.0   | 0.0 | 0.0   | 0.0   |
|                                    | G   | 0.0  | 99.9 | 0.0  | 99.9 | 99.9 | 0.0   | 0.4  | 0.1  | 0.0   | 100.0 | 0.0  | 0.0   | 99.9 | 0.0   | 0.0  | 0.0  | 0.0  | 0.0   | 0.0   | 0.0   | 0.0   | 0.0 | 100.0 | 100.0 |
|                                    | T   | 99.9 | 0.0  | 0.0  | 0.0  | 0.0  | 100.0 | 46.3 | 43.0 | 0.0   | 0.0   | 3.4  | 100.0 | 0.0  | 0.0   | 0.0  | 0.0  | 0.8  | 0.0   | 100.0 | 0.0   | 100.0 | 0.0 | 0.0   | 0.0   |
| -                                  | 0.0 | 0.0  | 0.0  | 0.0  | 0.0  | 0.0  | 0.0   | 0.1  | 0.0  | 0.0   | 0.0   | 0.0  | 0.0   | 0.0  | 0.0   | 0.0  | 0.0  | 0.0  | 0.0   | 0.0   | 0.0   | 0.0   | 0.0 | 0.0   |       |

  

| evoA1-seB: T2A +Rap<br>Replicate 2 |     | C    | C    | T    | G    | C    | T    | C    | A    | G    | G    | A    | A    | C    | C    | A    | G    | T    | G    | C    | A    | A    | G   | G    |      |
|------------------------------------|-----|------|------|------|------|------|------|------|------|------|------|------|------|------|------|------|------|------|------|------|------|------|-----|------|------|
|                                    | A   | 0.0  | 0.0  | 99.9 | 0.0  | 0.0  | 0.1  | 0.1  | 0.0  | 99.9 | 0.0  | 0.0  | 0.0  | 0.0  | 99.9 | 99.9 | 0.0  | 0.0  | 99.9 | 0.0  | 99.9 | 0.0  | 0.0 | 0.0  | 0.0  |
|                                    | C   | 0.0  | 0.0  | 0.0  | 0.0  | 0.0  | 0.0  | 66.9 | 70.4 | 0.0  | 0.0  | 97.9 | 0.0  | 0.0  | 0.0  | 0.0  | 99.9 | 99.4 | 0.0  | 0.0  | 0.0  | 0.0  | 0.0 | 0.0  | 0.0  |
|                                    | G   | 0.0  | 99.9 | 0.0  | 99.9 | 99.9 | 0.4  | 0.4  | 0.0  | 0.0  | 99.9 | 0.0  | 0.0  | 99.9 | 0.0  | 0.0  | 0.0  | 0.1  | 0.0  | 0.0  | 0.0  | 0.0  | 0.0 | 99.9 | 99.9 |
|                                    | T   | 99.9 | 0.0  | 0.0  | 0.0  | 0.0  | 99.5 | 32.6 | 29.6 | 0.0  | 0.0  | 2.0  | 99.9 | 0.0  | 0.0  | 0.0  | 0.0  | 0.5  | 0.0  | 99.9 | 0.0  | 99.9 | 0.0 | 99.9 | 0.0  |
| -                                  | 0.1 | 0.1  | 0.1  | 0.1  | 0.0  | 0.0  | 0.0  | 0.1  | 0.1  | 0.1  | 0.1  | 0.1  | 0.1  | 0.1  | 0.1  | 0.1  | 0.1  | 0.1  | 0.1  | 0.0  | 0.0  | 0.0  | 0.0 | 0.0  |      |

  

| evoA1-seB: T2A +Rap<br>Replicate 3 |     | C    | C    | T    | G    | C    | T    | C    | A    | G    | G    | A    | A    | C    | C     | A     | G    | T    | G    | C    | A     | A    | G   | G     |       |
|------------------------------------|-----|------|------|------|------|------|------|------|------|------|------|------|------|------|-------|-------|------|------|------|------|-------|------|-----|-------|-------|
|                                    | A   | 0.1  | 0.0  | 99.9 | 0.0  | 0.0  | 0.0  | 0.2  | 0.0  | 99.9 | 0.0  | 0.0  | 0.0  | 0.0  | 100.0 | 100.0 | 0.0  | 0.0  | 99.9 | 0.0  | 100.0 | 0.0  | 0.0 | 0.0   | 0.0   |
|                                    | C   | 0.0  | 0.0  | 0.0  | 0.0  | 0.0  | 0.0  | 56.9 | 59.8 | 0.0  | 0.0  | 97.5 | 0.0  | 0.0  | 0.0   | 0.0   | 99.9 | 99.3 | 0.0  | 0.0  | 0.0   | 0.0  | 0.0 | 0.0   | 0.0   |
|                                    | G   | 0.1  | 99.9 | 0.0  | 99.9 | 99.9 | 0.3  | 0.3  | 0.0  | 0.0  | 99.9 | 0.0  | 0.0  | 99.9 | 0.0   | 0.0   | 0.0  | 0.1  | 0.0  | 0.1  | 0.0   | 0.0  | 0.0 | 100.0 | 100.0 |
|                                    | T   | 99.8 | 0.0  | 0.0  | 0.0  | 0.0  | 99.6 | 42.6 | 40.0 | 0.0  | 0.0  | 2.4  | 99.9 | 0.0  | 0.0   | 0.0   | 0.1  | 0.6  | 0.0  | 99.9 | 0.0   | 99.9 | 0.0 | 0.0   | 0.0   |
| -                                  | 0.1 | 0.1  | 0.1  | 0.1  | 0.1  | 0.1  | 0.1  | 0.1  | 0.1  | 0.1  | 0.1  | 0.1  | 0.1  | 0.1  | 0.0   | 0.0   | 0.0  | 0.1  | 0.0  | 0.0  | 0.0   | 0.0  | 0.0 | 0.0   |       |

  

| evoA1-seB: T2A +Rap<br>Replicate 1 |     | I    | G    | A     | G     | G     | T     | C    | C    | A     | G   | G    | C     | T   | G     | A     | A    | C    | C     | A     | T     | A     | T   | G    | G     |
|------------------------------------|-----|------|------|-------|-------|-------|-------|------|------|-------|-----|------|-------|-----|-------|-------|------|------|-------|-------|-------|-------|-----|------|-------|
|                                    | A   | 0.0  | 0.0  | 100.0 | 0.0   | 0.0   | 0.0   | 0.0  | 0.0  | 100.0 | 0.0 | 0.0  | 0.0   | 0.0 | 100.0 | 100.0 | 0.1  | 0.1  | 100.0 | 0.0   | 100.0 | 0.0   | 0.0 | 0.0  | 0.0   |
|                                    | C   | 0.1  | 0.0  | 0.0   | 0.0   | 0.0   | 0.0   | 94.0 | 95.9 | 0.0   | 0.0 | 99.6 | 0.0   | 0.0 | 0.0   | 0.0   | 99.9 | 99.8 | 0.0   | 0.0   | 0.0   | 0.0   | 0.0 | 0.0  | 0.0   |
|                                    | G   | 0.0  | 99.9 | 0.0   | 100.0 | 100.0 | 0.0   | 0.0  | 0.0  | 100.0 | 0.0 | 0.0  | 100.0 | 0.0 | 0.0   | 100.0 | 0.0  | 0.0  | 0.0   | 0.0   | 0.0   | 0.0   | 0.0 | 99.9 | 100.0 |
|                                    | T   | 99.9 | 0.0  | 0.0   | 0.0   | 0.0   | 100.0 | 5.9  | 4.0  | 0.0   | 0.0 | 0.4  | 100.0 | 0.0 | 0.0   | 0.0   | 0.0  | 0.1  | 0.0   | 100.0 | 0.0   | 100.0 | 0.0 | 0.0  | 0.0   |
| -                                  | 0.0 | 0.0  | 0.0  | 0.0   | 0.0   | 0.0   | 0.0   | 0.1  | 0.0  | 0.0   | 0.0 | 0.0  | 0.0   | 0.0 | 0.0   | 0.0   | 0.0  | 0.0  | 0.0   | 0.0   | 0.0   | 0.0   | 0.0 | 0.0  |       |

  

| evoA1-seB: T2A +Rap<br>Replicate 2 |     | C     | C     | T     | G     | C     | T    | C    | A    | G     | G     | A    | A     | C     | C     | A    | G     | T    | G     | C    | A     | A     | G   | G     |       |
|------------------------------------|-----|-------|-------|-------|-------|-------|------|------|------|-------|-------|------|-------|-------|-------|------|-------|------|-------|------|-------|-------|-----|-------|-------|
|                                    | A   | 0.0   | 0.0   | 100.0 | 0.0   | 0.0   | 0.1  | 0.0  | 0.0  | 100.0 | 0.0   | 0.0  | 0.0   | 0.0   | 100.0 | 99.9 | 0.0   | 0.0  | 100.0 | 0.0  | 100.0 | 0.0   | 0.0 | 0.0   | 0.0   |
|                                    | C   | 0.0   | 0.0   | 0.0   | 0.0   | 0.0   | 0.0  | 95.7 | 97.5 | 0.0   | 0.0   | 99.8 | 0.0   | 0.0   | 0.0   | 0.1  | 100.0 | 99.9 | 0.0   | 0.0  | 0.0   | 0.0   | 0.0 | 0.0   | 0.0   |
|                                    | G   | 0.0   | 100.0 | 0.0   | 100.0 | 100.0 | 0.3  | 0.1  | 0.0  | 0.0   | 100.0 | 0.0  | 0.0   | 100.0 | 0.0   | 0.0  | 0.0   | 0.0  | 0.0   | 0.0  | 0.0   | 0.0   | 0.0 | 100.0 | 100.0 |
|                                    | T   | 100.0 | 0.0   | 0.0   | 0.0   | 0.0   | 99.5 | 4.2  | 2.5  | 0.0   | 0.0   | 0.2  | 100.0 | 0.0   | 0.0   | 0.0  | 0.1   | 0.0  | 0.0   | 99.9 | 0.0   | 100.0 | 0.0 | 0.0   | 0.0   |
| -                                  | 0.0 | 0.0   | 0.0   | 0.0   | 0.0   | 0.0   | 0.0  | 0.0  | 0.0  | 0.0   | 0.0   | 0.0  | 0.0   | 0.0   | 0.0   | 0.0  | 0.0   | 0.0  | 0.0   | 0.0  | 0.0   | 0.0   | 0.0 | 0.0   |       |

  

| evoA1-seB: T2A +Rap<br>Replicate 3 |   | C    | C     | T     | G     | C     | T    | C    | A    | G    | G     | A    | A     | C     | C    | A    | G     | T    | G    | C    | A    | A     | G    | G     |      |
|------------------------------------|---|------|-------|-------|-------|-------|------|------|------|------|-------|------|-------|-------|------|------|-------|------|------|------|------|-------|------|-------|------|
|                                    | A | 0.1  | 0.0   | 100.0 | 0.0   | 0.1   | 0.1  | 0.1  | 0.0  | 99.9 | 0.0   | 0.0  | 0.0   | 0.0   | 99.9 | 99.9 | 0.0   | 0.0  | 99.9 | 0.0  | 99.9 | 0.0   | 99.9 | 0.0   | 0.0  |
|                                    | C | 0.0  | 0.0   | 0.0   | 0.0   | 0.0   | 0.1  | 94.4 | 96.6 | 0.0  | 0.0   | 99.8 | 0.1   | 0.0   | 0.1  | 0.0  | 100.0 | 99.8 | 0.0  | 0.0  | 0.0  | 0.0   | 0.0  | 0.0   | 0.0  |
|                                    | G | 0.0  | 100.0 | 0.0   | 100.0 | 100.0 | 0.3  | 0.1  | 0.0  | 0.1  | 100.0 | 0.0  | 0.0   | 100.0 | 0.0  | 0.0  | 0.0   | 0.0  | 0.1  | 0.1  | 0.1  | 0.1   | 0.0  | 100.0 | 99.9 |
|                                    | T | 99.9 | 0.0   | 0.0   | 0.0   | 0.0   | 99.6 | 5.4  | 3.4  | 0.0  | 0.0   | 0.2  | 100.0 | 0.0   | 0.0  | 0.1  | 0.0   | 0.1  | 0.0  | 99.9 | 0.0  | 100.0 | 0.0  |       |      |

# Supplementary Figure 1

| <i>f</i>  |   | <i>TET2 Q180*</i> |      |      |      |      |      |       |       |       |       |       |      |       |     |       |       |       |       |       |       |       |       |       |  |      |  |  |  |
|-----------|---|-------------------|------|------|------|------|------|-------|-------|-------|-------|-------|------|-------|-----|-------|-------|-------|-------|-------|-------|-------|-------|-------|--|------|--|--|--|
|           |   | L179              |      |      |      | Q180 |      |       |       | I181  |       |       |      | L182  |     |       |       | N183  |       |       |       | E184  |       |       |  | Q185 |  |  |  |
|           |   | G                 | C    | T    | T    | C    | A    | G     | A     | T     | T     | C     | T    | G     | A   | A     | T     | G     | A     | G     | C     | A     | G     | G     |  |      |  |  |  |
| untreated | A | 0.0               | 0.0  | 0.0  | 0.0  | 0.0  | 99.9 | 0.0   | 100.0 | 0.0   | 0.0   | 0.0   | 0.0  | 0.0   | 0.0 | 100.0 | 100.0 | 0.0   | 0.0   | 100.0 | 0.0   | 0.0   | 100.0 | 0.0   |  |      |  |  |  |
|           | C | 0.0               | 99.9 | 0.0  | 0.0  | 99.9 | 0.0  | 0.0   | 0.0   | 0.0   | 0.0   | 100.0 | 0.1  | 0.0   | 0.0 | 0.0   | 0.0   | 0.0   | 0.0   | 0.0   | 0.0   | 100.0 | 0.0   | 0.0   |  |      |  |  |  |
|           | G | 100.0             | 0.0  | 0.1  | 0.1  | 0.0  | 0.0  | 100.0 | 0.0   | 0.0   | 0.0   | 0.0   | 0.1  | 100.0 | 0.0 | 0.0   | 0.0   | 0.0   | 100.0 | 0.0   | 100.0 | 0.0   | 0.0   | 100.0 |  |      |  |  |  |
|           | T | 0.0               | 0.0  | 99.9 | 99.9 | 0.0  | 0.0  | 0.0   | 0.0   | 100.0 | 100.0 | 0.0   | 99.8 | 0.0   | 0.0 | 0.0   | 0.0   | 100.0 | 0.0   | 0.0   | 0.0   | 0.0   | 0.0   | 0.0   |  |      |  |  |  |
|           | - | 0.0               | 0.0  | 0.0  | 0.0  | 0.0  | 0.0  | 0.0   | 0.0   | 0.0   | 0.0   | 0.0   | 0.0  | 0.0   | 0.0 | 0.0   | 0.0   | 0.0   | 0.0   | 0.0   | 0.0   | 0.0   | 0.0   | 0.0   |  |      |  |  |  |

  

|                           |   | I    | C    | T    | T    | C    | A    | G    | A    | T    | T    | C    | T    | G    | A    | A    | T    | G    | A    | G    | C    | A     | G     | G     |
|---------------------------|---|------|------|------|------|------|------|------|------|------|------|------|------|------|------|------|------|------|------|------|------|-------|-------|-------|
| evoA1-seBEMax Replicate 1 | A | 0.0  | 0.0  | 0.0  | 0.0  | 0.1  | 99.7 | 0.0  | 99.7 | 0.0  | 0.0  | 0.1  | 0.0  | 0.0  | 99.7 | 99.8 | 0.0  | 0.0  | 99.9 | 0.0  | 0.0  | 100.0 | 0.0   | 0.0   |
|                           | C | 0.0  | 94.6 | 0.0  | 0.0  | 75.8 | 0.0  | 0.0  | 0.0  | 0.0  | 0.0  | 87.4 | 0.0  | 0.0  | 0.0  | 0.0  | 0.0  | 0.0  | 0.0  | 0.0  | 99.9 | 0.0   | 0.0   |       |
|                           | G | 99.9 | 0.1  | 0.0  | 0.0  | 0.1  | 0.0  | 99.7 | 0.0  | 0.0  | 0.0  | 0.3  | 0.0  | 99.7 | 0.0  | 0.0  | 0.0  | 99.9 | 0.0  | 99.9 | 0.0  | 0.0   | 100.0 | 100.0 |
|                           | T | 0.0  | 5.2  | 99.8 | 99.8 | 23.7 | 0.0  | 0.0  | 0.0  | 99.6 | 99.7 | 11.9 | 99.7 | 0.0  | 0.0  | 0.0  | 99.8 | 0.0  | 0.0  | 0.0  | 0.0  | 0.0   | 0.0   | 0.0   |
|                           | - | 0.1  | 0.1  | 0.2  | 0.2  | 0.2  | 0.2  | 0.3  | 0.3  | 0.3  | 0.3  | 0.3  | 0.3  | 0.2  | 0.2  | 0.2  | 0.1  | 0.1  | 0.1  | 0.0  | 0.0  | 0.0   | 0.0   | 0.0   |

  

|                           |   | G    | C    | T    | T    | C    | A    | G    | A    | T    | T    | C    | T    | G    | A    | A    | T    | G    | A    | G    | C    | A     | G     | G    |
|---------------------------|---|------|------|------|------|------|------|------|------|------|------|------|------|------|------|------|------|------|------|------|------|-------|-------|------|
| evoA1-seBEMax Replicate 2 | A | 0.0  | 0.0  | 0.0  | 0.0  | 0.2  | 99.8 | 0.0  | 99.7 | 0.0  | 0.0  | 0.2  | 0.0  | 0.0  | 99.8 | 99.8 | 0.0  | 0.1  | 99.9 | 0.0  | 0.0  | 100.0 | 0.0   | 0.0  |
|                           | C | 0.0  | 93.8 | 0.0  | 0.0  | 73.4 | 0.0  | 0.0  | 0.0  | 0.0  | 0.0  | 86.2 | 0.0  | 0.0  | 0.0  | 0.0  | 0.0  | 0.0  | 0.0  | 0.0  | 99.9 | 0.0   | 0.0   |      |
|                           | G | 99.9 | 0.1  | 0.0  | 0.0  | 0.3  | 0.0  | 99.7 | 0.0  | 0.0  | 0.0  | 0.3  | 0.0  | 99.8 | 0.0  | 0.0  | 0.0  | 99.8 | 0.0  | 99.9 | 0.0  | 0.0   | 100.0 | 99.9 |
|                           | T | 0.0  | 6.0  | 99.8 | 99.8 | 25.9 | 0.0  | 0.0  | 0.0  | 99.6 | 99.6 | 12.9 | 99.6 | 0.0  | 0.0  | 0.0  | 99.8 | 0.0  | 0.0  | 0.0  | 0.0  | 0.0   | 0.0   | 0.0  |
|                           | - | 0.1  | 0.1  | 0.2  | 0.2  | 0.3  | 0.2  | 0.3  | 0.3  | 0.3  | 0.4  | 0.3  | 0.4  | 0.3  | 0.2  | 0.2  | 0.2  | 0.1  | 0.1  | 0.1  | 0.1  | 0.1   | 0.0   | 0.0  |

  

|                           |   | G    | C    | T    | T    | C    | A    | G    | A    | T    | T    | C    | T    | G    | A    | A    | T    | G    | A    | G    | C    | A     | G    | G     |
|---------------------------|---|------|------|------|------|------|------|------|------|------|------|------|------|------|------|------|------|------|------|------|------|-------|------|-------|
| evoA1-seBEMax Replicate 3 | A | 0.1  | 0.0  | 0.0  | 0.0  | 0.2  | 99.8 | 0.0  | 99.7 | 0.0  | 0.0  | 0.1  | 0.0  | 0.0  | 99.7 | 99.7 | 0.0  | 0.0  | 99.9 | 0.0  | 0.0  | 100.0 | 0.0  | 0.0   |
|                           | C | 0.0  | 93.3 | 0.0  | 0.0  | 70.9 | 0.0  | 0.0  | 0.0  | 0.0  | 0.0  | 85.0 | 0.0  | 0.0  | 0.0  | 0.0  | 0.0  | 0.0  | 0.0  | 0.0  | 99.9 | 0.0   | 0.0  |       |
|                           | G | 99.8 | 0.0  | 0.0  | 0.0  | 0.2  | 0.0  | 99.7 | 0.0  | 0.0  | 0.0  | 0.3  | 0.0  | 99.7 | 0.0  | 0.0  | 0.0  | 99.8 | 0.0  | 99.9 | 0.0  | 0.0   | 99.9 | 100.0 |
|                           | T | 0.0  | 6.5  | 99.8 | 99.8 | 28.5 | 0.0  | 0.0  | 0.0  | 99.7 | 99.7 | 14.2 | 99.6 | 0.0  | 0.0  | 0.0  | 99.7 | 0.0  | 0.0  | 0.0  | 0.0  | 0.0   | 0.0  | 0.0   |
|                           | - | 0.1  | 0.1  | 0.1  | 0.2  | 0.2  | 0.2  | 0.3  | 0.3  | 0.3  | 0.3  | 0.4  | 0.3  | 0.3  | 0.3  | 0.3  | 0.3  | 0.2  | 0.1  | 0.1  | 0.1  | 0.1   | 0.0  | 0.0   |

  

|                                |   | I    | C    | T    | T    | C    | A    | G    | A    | T    | T    | C    | T    | G    | A    | A    | T    | G     | A    | G     | C    | A     | G     | G     |
|--------------------------------|---|------|------|------|------|------|------|------|------|------|------|------|------|------|------|------|------|-------|------|-------|------|-------|-------|-------|
| evoA1-seBE T2A+Rap Replicate 1 | A | 0.0  | 0.0  | 0.0  | 0.0  | 0.0  | 99.9 | 0.0  | 99.9 | 0.0  | 0.0  | 0.0  | 0.0  | 0.0  | 99.9 | 99.9 | 0.0  | 0.0   | 99.9 | 0.0   | 0.0  | 100.0 | 0.0   | 0.0   |
|                                | C | 0.0  | 96.0 | 0.0  | 0.0  | 85.7 | 0.0  | 0.0  | 0.0  | 0.0  | 0.0  | 93.3 | 0.0  | 0.0  | 0.0  | 0.0  | 0.0  | 0.0   | 0.0  | 0.0   | 99.9 | 0.0   | 0.0   |       |
|                                | G | 99.9 | 0.0  | 0.0  | 0.0  | 0.0  | 0.0  | 99.9 | 0.0  | 0.0  | 0.0  | 0.0  | 0.0  | 99.9 | 0.0  | 0.0  | 0.0  | 100.0 | 0.0  | 100.0 | 0.0  | 0.0   | 100.0 | 100.0 |
|                                | T | 0.0  | 3.9  | 99.9 | 99.9 | 14.1 | 0.0  | 0.0  | 0.0  | 99.9 | 99.8 | 6.5  | 99.8 | 0.0  | 0.0  | 0.0  | 99.9 | 0.0   | 0.0  | 0.0   | 0.0  | 0.0   | 0.0   | 0.0   |
|                                | - | 0.1  | 0.1  | 0.1  | 0.1  | 0.1  | 0.1  | 0.1  | 0.1  | 0.1  | 0.1  | 0.1  | 0.1  | 0.1  | 0.1  | 0.1  | 0.1  | 0.1   | 0.0  | 0.0   | 0.0  | 0.0   | 0.0   | 0.0   |

  

|                                |   | G     | C    | T    | T    | C    | A     | G     | A    | T    | T    | C    | T    | G    | A     | A    | T    | G     | A     | G     | C     | A     | G     | G     |
|--------------------------------|---|-------|------|------|------|------|-------|-------|------|------|------|------|------|------|-------|------|------|-------|-------|-------|-------|-------|-------|-------|
| evoA1-seBE T2A+Rap Replicate 2 | A | 0.0   | 0.0  | 0.0  | 0.0  | 0.0  | 100.0 | 0.0   | 99.9 | 0.0  | 0.0  | 0.0  | 0.0  | 0.0  | 100.0 | 99.9 | 0.0  | 0.0   | 100.0 | 0.0   | 0.0   | 100.0 | 0.0   | 0.0   |
|                                | C | 0.0   | 97.3 | 0.0  | 0.0  | 90.2 | 0.0   | 0.0   | 0.0  | 0.0  | 0.0  | 95.4 | 0.0  | 0.0  | 0.0   | 0.0  | 0.0  | 0.0   | 0.0   | 0.0   | 100.0 | 0.0   | 0.0   |       |
|                                | G | 100.0 | 0.0  | 0.0  | 0.0  | 0.0  | 0.0   | 100.0 | 0.0  | 0.0  | 0.0  | 0.1  | 0.0  | 99.9 | 0.0   | 0.0  | 0.0  | 100.0 | 0.0   | 100.0 | 0.0   | 0.0   | 100.0 | 100.0 |
|                                | T | 0.0   | 2.7  | 99.9 | 99.9 | 9.7  | 0.0   | 0.0   | 0.0  | 99.9 | 99.9 | 4.5  | 99.9 | 0.0  | 0.0   | 0.0  | 99.9 | 0.0   | 0.0   | 0.0   | 0.0   | 0.0   | 0.0   | 0.0   |
|                                | - | 0.0   | 0.0  | 0.0  | 0.0  | 0.0  | 0.0   | 0.0   | 0.0  | 0.0  | 0.0  | 0.0  | 0.0  | 0.0  | 0.0   | 0.0  | 0.0  | 0.0   | 0.0   | 0.0   | 0.0   | 0.0   | 0.0   | 0.0   |

  

|                                |   | G    | C    | T    | T    | C    | A     | G    | A    | T    | T    | C    | T    | G     | A     | A     | T    | G    | A    | G    | C     | A     | G     | G    |
|--------------------------------|---|------|------|------|------|------|-------|------|------|------|------|------|------|-------|-------|-------|------|------|------|------|-------|-------|-------|------|
| evoA1-seBE T2A+Rap Replicate 3 | A | 0.0  | 0.0  | 0.0  | 0.0  | 0.1  | 100.0 | 0.0  | 99.9 | 0.0  | 0.0  | 0.0  | 0.0  | 0.0   | 100.0 | 100.0 | 0.0  | 0.0  | 99.9 | 0.0  | 0.0   | 100.0 | 0.0   | 0.0  |
|                                | C | 0.0  | 98.4 | 0.0  | 0.0  | 93.1 | 0.0   | 0.0  | 0.0  | 0.0  | 0.0  | 96.4 | 0.0  | 0.0   | 0.0   | 0.0   | 0.0  | 0.0  | 0.0  | 0.0  | 100.0 | 0.0   | 0.0   |      |
|                                | G | 99.9 | 0.0  | 0.0  | 0.0  | 0.0  | 0.0   | 99.9 | 0.0  | 0.0  | 0.0  | 0.1  | 0.0  | 100.0 | 0.0   | 0.0   | 0.0  | 99.9 | 0.0  | 99.9 | 0.0   | 0.0   | 100.0 | 99.9 |
|                                | T | 0.0  | 1.6  | 99.9 | 99.9 | 6.8  | 0.0   | 0.0  | 0.0  | 99.9 | 99.9 | 3.4  | 99.9 | 0.0   | 0.0   | 0.0   | 99.9 | 0.0  | 0.0  | 0.0  | 0.0   | 0.0   | 0.0   | 0.0  |
|                                | - | 0.0  | 0.0  | 0.0  | 0.0  | 0.0  | 0.0   | 0.0  | 0.0  | 0.0  | 0.0  | 0.0  | 0.0  | 0.0   | 0.0   | 0.0   | 0.0  | 0.0  | 0.0  | 0.0  | 0.0   | 0.0   | 0.0   | 0.0  |

  

|                                |   | I     | C    | T     | T     | C    | A     | G     | A     | T     | T     | C    | T    | G     | A     | A     | T     | G     | A     | G     | C     | A     | G     | G     |
|--------------------------------|---|-------|------|-------|-------|------|-------|-------|-------|-------|-------|------|------|-------|-------|-------|-------|-------|-------|-------|-------|-------|-------|-------|
| evoA1-seBE T2A Rap Replicate 1 | A | 0.0   | 0.0  | 0.0   | 0.0   | 0.0  | 100.0 | 0.0   | 100.0 | 0.0   | 0.0   | 0.0  | 0.0  | 0.0   | 100.0 | 100.0 | 0.0   | 0.0   | 100.0 | 0.0   | 0.0   | 100.0 | 0.0   | 0.0   |
|                                | C | 0.0   | 99.9 | 0.0   | 0.0   | 99.6 | 0.0   | 0.0   | 0.0   | 0.0   | 0.0   | 99.8 | 0.0  | 0.0   | 0.0   | 0.0   | 0.0   | 0.0   | 0.0   | 0.0   | 100.0 | 0.0   | 0.0   |       |
|                                | G | 100.0 | 0.0  | 0.0   | 0.0   | 0.0  | 0.0   | 100.0 | 0.0   | 0.0   | 0.0   | 0.0  | 0.0  | 100.0 | 0.0   | 0.0   | 0.0   | 100.0 | 0.0   | 100.0 | 0.0   | 0.0   | 100.0 | 100.0 |
|                                | T | 0.0   | 0.1  | 100.0 | 100.0 | 0.4  | 0.0   | 0.0   | 0.0   | 100.0 | 100.0 | 0.1  | 99.9 | 0.0   | 0.0   | 0.0   | 100.0 | 0.0   | 0.0   | 0.0   | 0.0   | 0.0   | 0.0   | 0.0   |
|                                | - | 0.0   | 0.0  | 0.0   | 0.0   | 0.0  | 0.0   | 0.0   | 0.0   | 0.0   | 0.0   | 0.0  | 0.0  | 0.0   | 0.0   | 0.0   | 0.0   | 0.0   | 0.0   | 0.0   | 0.0   | 0.0   | 0.0   | 0.0   |

  

|                                |   | G     | C    | T     | T     | C    | A     | G    | A     | T     | T     | C    | T     | G     | A    | A    | T    | G     | A    | G    | C     | A     | G     | G     |
|--------------------------------|---|-------|------|-------|-------|------|-------|------|-------|-------|-------|------|-------|-------|------|------|------|-------|------|------|-------|-------|-------|-------|
| evoA1-seBE T2A Rap Replicate 2 | A | 0.0   | 0.0  | 0.0   | 0.0   | 0.0  | 100.0 | 0.0  | 100.0 | 0.0   | 0.0   | 0.0  | 0.0   | 0.0   | 99.9 | 99.9 | 0.0  | 0.0   | 99.9 | 0.0  | 0.0   | 100.0 | 0.0   | 0.0   |
|                                | C | 0.0   | 99.9 | 0.0   | 0.0   | 99.6 | 0.0   | 0.0  | 0.0   | 0.0   | 0.0   | 99.9 | 0.0   | 0.0   | 0.0  | 0.0  | 0.0  | 0.0   | 0.0  | 0.0  | 100.0 | 0.0   | 0.0   |       |
|                                | G | 100.0 | 0.0  | 0.0   | 0.0   | 0.0  | 0.0   | 99.9 | 0.0   | 0.0   | 0.0   | 0.0  | 0.0   | 100.0 | 0.0  | 0.0  | 0.0  | 100.0 | 0.0  | 99.9 | 0.0   | 0.0   | 100.0 | 100.0 |
|                                | T | 0.0   | 0.1  | 100.0 | 100.0 | 0.4  | 0.0   | 0.0  | 0.0   | 100.0 | 100.0 | 0.1  | 100.0 | 0.0   | 0.0  | 0.0  | 99.9 | 0.0   | 0.0  | 0.0  | 0.0   | 0.0   | 0.0   | 0.0   |
|                                | - | 0.0   | 0.0  | 0.0   | 0.0   | 0.0  | 0.0   | 0.0  | 0.0   | 0.0   | 0.0   | 0.0  | 0.0   | 0.0   | 0.0  | 0.0  | 0.0  | 0.0   | 0.0  | 0.0  | 0.0   | 0.0   | 0.0   | 0.0   |

  

|                                |   | G     | C    | T    | T    | C    | A    | G     | A    | T     | T     | C    | T    | G    | A    | A    | T    | G    | A     | G     | C     | A     | G     | G     |
|--------------------------------|---|-------|------|------|------|------|------|-------|------|-------|-------|------|------|------|------|------|------|------|-------|-------|-------|-------|-------|-------|
| evoA1-seBE T2A Rap Replicate 3 | A | 0.0   | 0.0  | 0.0  | 0.0  | 0.0  | 99.9 | 0.0   | 99.9 | 0.0   | 0.0   | 0.0  | 0.0  | 0.0  | 99.9 | 99.9 | 0.0  | 0.0  | 100.0 | 0.0   | 0.0   | 100.0 | 0.0   | 0.0   |
|                                | C | 0.0   | 99.8 | 0.0  | 0.0  | 98.9 | 0.0  | 0.0   | 0.0  | 0.0   | 0.0   | 99.5 | 0.0  | 0.0  | 0.0  | 0.0  | 0.0  | 0.0  | 0.0   | 0.0   | 100.0 | 0.0   | 0.0   |       |
|                                | G | 100.0 | 0.0  | 0.0  | 0.0  | 0.0  | 0.0  | 100.0 | 0.0  | 0.0   | 0.0   | 0.0  | 0.0  | 99.9 | 0.0  | 0.0  | 0.0  | 99.9 | 0.0   | 100.0 | 0.0   | 0.0   | 100.0 | 100.0 |
|                                | T | 0.0   | 0.2  | 99.9 | 99.9 | 1.0  | 0.0  | 0.0   | 0.0  | 100.0 | 100.0 | 0.4  | 99.9 | 0.0  | 0.0  | 0.0  | 99.9 | 0.0  | 0.0   | 0.0   | 0.0   | 0.0   | 0.0   | 0.0   |
|                                | - | 0.0   | 0.0  | 0.0  | 0.0  | 0.0  | 0.0  | 0.0   | 0.0  | 0.0   | 0.0   | 0.0  | 0.0  | 0.0  | 0.0  | 0.0  | 0.0  | 0.0  | 0.0   | 0.0   | 0.0   | 0.0   | 0.0   | 0.0   |



# Supplementary Figure 1

|           |     | g    |       |       |      |       |       |      |      |       |       |     |       |      |      |      |      |      |      |       |       |      |      |      |
|-----------|-----|------|-------|-------|------|-------|-------|------|------|-------|-------|-----|-------|------|------|------|------|------|------|-------|-------|------|------|------|
|           |     | P167 |       |       | I168 |       |       | T169 |      |       | I170  |     |       | G171 |      |      | R172 |      |      | H173  |       |      |      |      |
| untreated |     | C    | C     | C     | A    | T     | C     | A    | C    | C     | A     | T   | T     | G    | G    | C    | A    | G    | G    | C     | A     | C    | G    | C    |
|           | A   | 0.0  | 0.0   | 0.0   | 99.9 | 0.0   | 0.0   | 99.9 | 0.0  | 0.0   | 100.0 | 0.0 | 0.0   | 0.2  | 0.2  | 0.0  | 99.9 | 0.5  | 0.5  | 0.0   | 100.0 | 0.0  | 0.1  | 0.0  |
|           | C   | 99.9 | 100.0 | 100.0 | 0.0  | 0.0   | 100.0 | 0.0  | 99.9 | 100.0 | 0.0   | 0.0 | 0.0   | 0.0  | 0.0  | 99.9 | 0.0  | 0.0  | 0.0  | 100.0 | 0.0   | 99.9 | 0.0  | 99.9 |
|           | G   | 0.0  | 0.0   | 0.0   | 0.0  | 0.0   | 0.0   | 0.0  | 0.0  | 0.0   | 0.0   | 0.0 | 0.0   | 99.8 | 99.8 | 0.0  | 0.1  | 99.4 | 99.5 | 0.0   | 0.0   | 0.0  | 99.9 | 0.0  |
|           | T   | 0.1  | 0.0   | 0.0   | 0.0  | 100.0 | 0.0   | 0.0  | 0.0  | 0.0   | 0.0   | 0.0 | 100.0 | 99.9 | 0.0  | 0.0  | 0.0  | 0.0  | 0.0  | 0.0   | 0.0   | 0.0  | 0.0  | 0.0  |
| -         | 0.0 | 0.0  | 0.0   | 0.0   | 0.0  | 0.0   | 0.0   | 0.0  | 0.0  | 0.0   | 0.0   | 0.0 | 0.0   | 0.0  | 0.0  | 0.0  | 0.0  | 0.0  | 0.0  | 0.0   | 0.0   | 0.0  | 0.0  |      |

  

| evoA1-IBE:max<br>Replicate 1 |     | PAM   |       |      | 20    |     |      | 15   |      |      | 10   |      |     | 5    |      |      | 1    |      |      |      |      |      |      |      |
|------------------------------|-----|-------|-------|------|-------|-----|------|------|------|------|------|------|-----|------|------|------|------|------|------|------|------|------|------|------|
|                              |     | C     | C     | C    | A     | T   | C    | A    | C    | C    | A    | T    | T   | G    | G    | C    | A    | G    | G    | C    | A    | C    | G    | C    |
|                              | A   | 0.0   | 0.0   | 0.0  | 99.9  | 0.0 | 0.0  | 99.6 | 0.0  | 0.0  | 99.6 | 0.0  | 0.0 | 18.0 | 7.6  | 0.0  | 99.1 | 48.9 | 49.1 | 0.0  | 99.4 | 0.0  | 7.9  | 0.0  |
|                              | C   | 100.0 | 100.0 | 99.9 | 0.0   | 0.0 | 99.8 | 0.1  | 99.7 | 99.6 | 0.0  | 0.0  | 0.0 | 0.0  | 0.0  | 99.1 | 0.0  | 0.3  | 0.2  | 99.4 | 0.0  | 99.5 | 0.0  | 99.5 |
|                              | G   | 0.0   | 0.0   | 0.0  | 0.0   | 0.0 | 0.0  | 0.0  | 0.0  | 0.0  | 0.0  | 0.0  | 0.0 | 81.2 | 91.5 | 0.0  | 0.0  | 49.1 | 49.4 | 0.0  | 0.0  | 0.0  | 91.6 | 0.0  |
| T                            | 0.0 | 0.0   | 0.0   | 0.0  | 100.0 | 0.0 | 0.0  | 0.0  | 0.0  | 0.0  | 99.4 | 99.3 | 0.1 | 0.1  | 0.1  | 0.0  | 0.8  | 0.5  | 0.0  | 0.0  | 0.0  | 0.1  | 0.1  |      |
| -                            | 0.0 | 0.0   | 0.0   | 0.0  | 0.0   | 0.2 | 0.3  | 0.3  | 0.4  | 0.4  | 0.6  | 0.7  | 0.7 | 0.8  | 0.8  | 0.9  | 0.9  | 0.8  | 0.6  | 0.5  | 0.5  | 0.5  | 0.5  |      |

  

| evoA1-IBE:max<br>Replicate 2 |     | C    | C    | C    | A    | T    | C    | A    | C    | C    | A    | T    | T    | G    | G    | C    | A    | G    | G    | C    | A    | C    | G    | C    |
|------------------------------|-----|------|------|------|------|------|------|------|------|------|------|------|------|------|------|------|------|------|------|------|------|------|------|------|
|                              | A   | 0.0  | 0.0  | 0.0  | 99.9 | 0.0  | 0.0  | 99.7 | 0.0  | 0.0  | 99.7 | 0.0  | 0.0  | 13.1 | 5.6  | 0.0  | 99.3 | 40.1 | 39.8 | 0.0  | 99.5 | 0.0  | 5.3  | 0.0  |
|                              | C   | 99.9 | 99.9 | 99.9 | 0.0  | 0.0  | 99.9 | 0.0  | 99.7 | 99.7 | 0.0  | 0.0  | 0.0  | 0.0  | 0.0  | 99.4 | 0.0  | 0.2  | 0.3  | 99.6 | 0.0  | 99.7 | 0.0  | 99.7 |
|                              | G   | 0.0  | 0.0  | 0.0  | 0.0  | 0.0  | 0.0  | 0.1  | 0.0  | 0.0  | 0.0  | 0.0  | 0.0  | 86.3 | 93.8 | 0.0  | 0.0  | 58.4 | 58.8 | 0.0  | 0.0  | 0.0  | 94.4 | 0.0  |
|                              | T   | 0.1  | 0.0  | 0.0  | 0.0  | 99.9 | 0.1  | 0.0  | 0.1  | 0.0  | 0.0  | 99.6 | 99.4 | 0.1  | 0.0  | 0.1  | 0.0  | 0.6  | 0.5  | 0.0  | 0.0  | 0.0  | 0.0  | 0.1  |
| -                            | 0.0 | 0.0  | 0.0  | 0.0  | 0.0  | 0.1  | 0.2  | 0.2  | 0.2  | 0.3  | 0.4  | 0.5  | 0.6  | 0.6  | 0.6  | 0.6  | 0.7  | 0.6  | 0.4  | 0.4  | 0.3  | 0.3  | 0.2  |      |

  

| evoA1-IBE:max<br>Replicate 3 |     | C    | C    | C    | A    | T    | C    | A    | C    | C    | A    | T    | T    | G    | G    | C    | A    | G    | G    | C    | A    | C    | G    | C    |
|------------------------------|-----|------|------|------|------|------|------|------|------|------|------|------|------|------|------|------|------|------|------|------|------|------|------|------|
|                              | A   | 0.0  | 0.0  | 0.0  | 99.8 | 0.0  | 0.0  | 99.7 | 0.0  | 0.0  | 99.6 | 0.0  | 0.0  | 20.0 | 9.2  | 0.0  | 99.1 | 53.7 | 53.4 | 0.0  | 99.5 | 0.0  | 9.9  | 0.0  |
|                              | C   | 99.9 | 99.9 | 99.9 | 0.0  | 0.0  | 99.8 | 0.0  | 99.8 | 99.6 | 0.0  | 0.0  | 0.0  | 0.1  | 0.1  | 99.2 | 0.0  | 0.4  | 0.4  | 99.4 | 0.0  | 99.7 | 0.0  | 99.7 |
|                              | G   | 0.0  | 0.0  | 0.0  | 0.0  | 0.0  | 0.0  | 0.0  | 0.0  | 0.0  | 0.0  | 0.0  | 0.0  | 79.2 | 89.9 | 0.0  | 0.0  | 44.4 | 45.0 | 0.0  | 0.0  | 0.0  | 89.7 | 0.0  |
|                              | T   | 0.0  | 0.0  | 0.0  | 0.1  | 99.9 | 0.1  | 0.0  | 0.0  | 0.0  | 0.0  | 99.4 | 99.3 | 0.0  | 0.0  | 0.0  | 0.0  | 0.7  | 0.5  | 0.0  | 0.0  | 0.0  | 0.0  | 0.0  |
| -                            | 0.1 | 0.1  | 0.1  | 0.1  | 0.1  | 0.2  | 0.2  | 0.2  | 0.3  | 0.3  | 0.5  | 0.7  | 0.7  | 0.8  | 0.8  | 0.8  | 0.8  | 0.7  | 0.5  | 0.5  | 0.3  | 0.3  | 0.3  |      |

  

| evoA1-seBE<br>T2A +Rap<br>Replicate 1 |     | PAM   |       |       | 20    |     |       | 15   |      |      | 10   |      |     | 5    |      |      | 1    |      |      |      |      |      |      |      |
|---------------------------------------|-----|-------|-------|-------|-------|-----|-------|------|------|------|------|------|-----|------|------|------|------|------|------|------|------|------|------|------|
|                                       |     | C     | C     | C     | A     | T   | C     | A    | C    | C    | A    | T    | T   | G    | G    | C    | A    | G    | G    | C    | A    | C    | G    | C    |
|                                       | A   | 0.0   | 0.0   | 0.0   | 100.0 | 0.0 | 0.0   | 99.9 | 0.0  | 0.0  | 99.9 | 0.0  | 0.0 | 9.1  | 3.5  | 0.0  | 99.8 | 30.7 | 30.2 | 0.0  | 99.9 | 0.0  | 4.2  | 0.0  |
|                                       | C   | 100.0 | 100.0 | 100.0 | 0.0   | 0.0 | 100.0 | 0.0  | 99.9 | 99.9 | 0.0  | 0.0  | 0.0 | 0.1  | 0.0  | 99.8 | 0.0  | 0.1  | 0.2  | 99.9 | 0.0  | 99.9 | 0.0  | 99.9 |
|                                       | G   | 0.0   | 0.0   | 0.0   | 0.0   | 0.0 | 0.0   | 0.0  | 0.0  | 0.0  | 0.0  | 0.0  | 0.0 | 90.7 | 96.3 | 0.0  | 0.0  | 68.7 | 69.3 | 0.0  | 0.0  | 0.0  | 95.8 | 0.0  |
| T                                     | 0.0 | 0.0   | 0.0   | 0.0   | 100.0 | 0.0 | 0.0   | 0.0  | 0.0  | 0.0  | 99.8 | 99.9 | 0.0 | 0.0  | 0.0  | 0.0  | 0.3  | 0.2  | 0.0  | 0.0  | 0.0  | 0.0  | 0.0  |      |
| -                                     | 0.0 | 0.0   | 0.0   | 0.0   | 0.0   | 0.0 | 0.0   | 0.0  | 0.1  | 0.1  | 0.1  | 0.1  | 0.1 | 0.1  | 0.1  | 0.1  | 0.1  | 0.1  | 0.1  | 0.1  | 0.1  | 0.1  | 0.1  |      |

  

| evoA1-seBE<br>T2A +Rap<br>Replicate 2 |     | C    | C     | C     | A    | T     | C    | A    | C    | C    | A    | T    | T    | G    | G    | C    | A    | G    | G    | C    | A    | C    | G    | C    |
|---------------------------------------|-----|------|-------|-------|------|-------|------|------|------|------|------|------|------|------|------|------|------|------|------|------|------|------|------|------|
|                                       | A   | 0.0  | 0.0   | 0.0   | 99.9 | 0.0   | 0.0  | 99.9 | 0.0  | 0.0  | 99.9 | 0.0  | 0.0  | 6.4  | 2.3  | 0.0  | 99.8 | 22.7 | 22.3 | 0.0  | 99.8 | 0.0  | 2.7  | 0.0  |
|                                       | C   | 99.9 | 100.0 | 100.0 | 0.0  | 0.0   | 99.9 | 0.1  | 99.9 | 99.9 | 0.0  | 0.0  | 0.0  | 0.0  | 0.0  | 99.9 | 0.0  | 0.2  | 0.2  | 99.9 | 0.0  | 99.9 | 0.0  | 99.9 |
|                                       | G   | 0.0  | 0.0   | 0.0   | 0.0  | 0.0   | 0.0  | 0.0  | 0.0  | 0.0  | 0.0  | 0.0  | 0.0  | 93.4 | 97.5 | 0.0  | 0.0  | 76.9 | 77.3 | 0.0  | 0.1  | 0.0  | 97.2 | 0.0  |
|                                       | T   | 0.0  | 0.0   | 0.0   | 0.0  | 100.0 | 0.0  | 0.0  | 0.0  | 0.0  | 0.0  | 99.9 | 99.9 | 0.0  | 0.0  | 0.0  | 0.0  | 0.1  | 0.2  | 0.0  | 0.0  | 0.0  | 0.0  | 0.0  |
| -                                     | 0.0 | 0.0  | 0.0   | 0.0   | 0.0  | 0.0   | 0.0  | 0.0  | 0.0  | 0.0  | 0.1  | 0.1  | 0.1  | 0.1  | 0.1  | 0.1  | 0.1  | 0.1  | 0.1  | 0.1  | 0.1  | 0.1  | 0.1  |      |

  

| evoA1-seBE<br>T2A +Rap<br>Replicate 3 |     | C    | C    | C    | A    | T    | C    | A    | C    | C    | A    | T    | T    | G    | G    | C    | A    | G    | G    | C    | A    | C    | G    | C    |
|---------------------------------------|-----|------|------|------|------|------|------|------|------|------|------|------|------|------|------|------|------|------|------|------|------|------|------|------|
|                                       | A   | 0.0  | 0.0  | 0.0  | 99.9 | 0.0  | 0.0  | 99.9 | 0.0  | 0.0  | 99.9 | 0.0  | 0.0  | 10.2 | 3.3  | 0.0  | 99.7 | 35.9 | 35.3 | 0.0  | 99.8 | 0.0  | 4.9  | 0.0  |
|                                       | C   | 99.9 | 99.9 | 99.9 | 0.0  | 0.0  | 99.9 | 0.0  | 99.9 | 99.9 | 0.0  | 0.0  | 0.0  | 0.0  | 0.0  | 99.6 | 0.0  | 0.3  | 0.2  | 99.8 | 0.0  | 99.8 | 0.0  | 99.9 |
|                                       | G   | 0.0  | 0.0  | 0.0  | 0.0  | 0.0  | 0.0  | 0.0  | 0.0  | 0.0  | 0.0  | 0.0  | 0.0  | 89.5 | 96.4 | 0.0  | 0.1  | 63.3 | 64.1 | 0.0  | 0.0  | 0.0  | 95.0 | 0.0  |
|                                       | T   | 0.0  | 0.0  | 0.0  | 0.0  | 99.9 | 0.0  | 0.0  | 0.0  | 0.0  | 0.0  | 99.7 | 99.7 | 0.0  | 0.0  | 0.0  | 0.0  | 0.3  | 0.1  | 0.0  | 0.0  | 0.0  | 0.0  | 0.0  |
| -                                     | 0.0 | 0.0  | 0.0  | 0.0  | 0.1  | 0.1  | 0.1  | 0.1  | 0.1  | 0.1  | 0.2  | 0.3  | 0.3  | 0.3  | 0.3  | 0.3  | 0.3  | 0.2  | 0.2  | 0.2  | 0.2  | 0.2  | 0.1  |      |

  

| evoA1-seBE<br>T2A +Rap<br>Replicate 1 |     | PAM   |       |       | 20    |     |       | 15    |      |       | 10    |      |     | 5    |      |      | 1     |      |      |      |       |       |      |      |
|---------------------------------------|-----|-------|-------|-------|-------|-----|-------|-------|------|-------|-------|------|-----|------|------|------|-------|------|------|------|-------|-------|------|------|
|                                       |     | C     | C     | C     | A     | T   | C     | A     | C    | C     | A     | T    | T   | G    | G    | C    | A     | G    | G    | C    | A     | C     | G    | C    |
|                                       | A   | 0.0   | 0.0   | 0.0   | 100.0 | 0.0 | 0.0   | 100.0 | 0.0  | 0.0   | 100.0 | 0.0  | 0.0 | 0.7  | 0.3  | 0.0  | 100.0 | 6.0  | 5.5  | 0.0  | 100.0 | 0.0   | 0.5  | 0.0  |
|                                       | C   | 100.0 | 100.0 | 100.0 | 0.0   | 0.0 | 100.0 | 0.0   | 99.9 | 100.0 | 0.0   | 0.0  | 0.0 | 0.0  | 0.0  | 99.9 | 0.0   | 0.1  | 0.0  | 99.9 | 0.0   | 100.0 | 0.0  | 99.9 |
|                                       | G   | 0.0   | 0.0   | 0.0   | 0.0   | 0.0 | 0.0   | 0.0   | 0.0  | 0.0   | 0.0   | 0.0  | 0.0 | 99.2 | 99.7 | 0.0  | 0.0   | 93.9 | 94.4 | 0.0  | 0.0   | 0.0   | 99.5 | 0.0  |
| T                                     | 0.0 | 0.0   | 0.0   | 0.0   | 100.0 | 0.0 | 0.0   | 0.0   | 0.0  | 0.0   | 100.0 | 99.9 | 0.0 | 0.0  | 0.1  | 0.0  | 0.0   | 0.0  | 0.0  | 0.0  | 0.0   | 0.0   | 0.0  |      |
| -                                     | 0.0 | 0.0   | 0.0   | 0.0   | 0.0   | 0.0 | 0.0   | 0.0   | 0.0  | 0.0   | 0.0   | 0.0  | 0.0 | 0.0  | 0.0  | 0.0  | 0.0   | 0.0  | 0.0  | 0.0  | 0.0   | 0.0   | 0.0  |      |

  

| evoA1-seBE<br>T2A +Rap<br>Replicate 2 |     | C    | C     | C     | A    | T     | C     | A    | C    | C    | A    | T    | T    | G    | G    | C    | A    | G    | G    | C    | A    | C    | G    | C    |
|---------------------------------------|-----|------|-------|-------|------|-------|-------|------|------|------|------|------|------|------|------|------|------|------|------|------|------|------|------|------|
|                                       | A   | 0.0  | 0.0   | 0.0   | 99.9 | 0.0   | 0.0   | 99.9 | 0.0  | 0.0  | 99.9 | 0.0  | 0.0  | 0.5  | 0.1  | 0.0  | 99.9 | 4.0  | 3.5  | 0.0  | 99.8 | 0.0  | 0.2  | 0.0  |
|                                       | C   | 99.9 | 100.0 | 100.0 | 0.0  | 0.0   | 100.0 | 0.1  | 99.9 | 99.9 | 0.0  | 0.0  | 0.0  | 0.0  | 0.0  | 99.9 | 0.0  | 0.1  | 0.0  | 99.9 | 0.0  | 99.9 | 0.0  | 99.9 |
|                                       | G   | 0.0  | 0.0   | 0.0   | 0.0  | 0.0   | 0.0   | 0.0  | 0.0  | 0.0  | 0.0  | 0.0  | 0.0  | 99.4 | 99.8 | 0.0  | 0.1  | 95.9 | 96.4 | 0.0  | 0.1  | 0.0  | 99.8 | 0.0  |
|                                       | T   | 0.1  | 0.0   | 0.0   | 0.0  | 100.0 | 0.0   | 0.0  | 0.0  | 0.0  | 0.0  | 99.9 | 99.9 | 0.0  | 0.0  | 0.0  | 0.0  | 0.0  | 0.0  | 0.0  | 0.0  | 0.0  | 0.0  | 0.0  |
| -                                     | 0.0 | 0.0  | 0.0   | 0.0   | 0.0  | 0.0   | 0.0   | 0.0  | 0.0  | 0.0  | 0.0  | 0.0  | 0.0  | 0.0  | 0.0  | 0.0  | 0.0  | 0.0  | 0.0  | 0.0  | 0.0  | 0.0  | 0.0  |      |

  

| evoA1-seBE<br>T2A +Rap<br>Replicate 3 |   | C     | C     | C    | A    | T   | C    | A    | C    | C    | A    | T   | T   | G    | G    | C    | A    | G    | G    | C     | A    | C    | G   | C    |
|---------------------------------------|---|-------|-------|------|------|-----|------|------|------|------|------|-----|-----|------|------|------|------|------|------|-------|------|------|-----|------|
|                                       | A | 0.0   | 0.0   | 0.0  | 99.9 | 0.0 | 0.0  | 99.9 | 0.0  | 0.0  | 99.9 | 0.0 | 0.0 | 0.7  | 0.3  | 0.0  | 99.9 | 5.7  | 5.1  | 0.0   | 99.9 | 0.0  | 0.2 | 0.0  |
|                                       | C | 100.0 | 100.0 | 99.9 | 0.0  | 0.0 | 99.9 | 0.0  | 99.9 | 99.9 | 0.0  | 0.0 | 0.0 | 0.0  | 0.0  | 99.9 | 0.0  | 0.1  | 0.0  | 100.0 | 0.0  | 99.9 | 0.0 | 99.9 |
|                                       | G | 0.0   | 0.0   | 0.0  | 0.1  | 0.0 | 0.0  | 0.0  | 0.0  | 0.0  | 0.0  | 0.0 | 0.0 | 99.3 | 99.7 | 0.0  | 0.1  | 94.2 | 94.8 | 0.0   | 0.0  | 0.0  |     |      |

# Supplementary Figure 1

| <i>h</i>  |     | <i>EMXI</i> |      |      |      |      |      |      |      |      |      |     |      |      |      |      |      |      |      |      |      |      |      |      |      |
|-----------|-----|-------------|------|------|------|------|------|------|------|------|------|-----|------|------|------|------|------|------|------|------|------|------|------|------|------|
|           |     | E225        |      |      | S226 |      |      | E227 |      |      | Q228 |     |      | K229 |      |      | K230 |      |      | K231 |      |      |      |      |      |
| untreated |     | G           | A    | G    | T    | C    | C    | G    | A    | G    | C    | A   | G    | A    | A    | G    | A    | A    | G    | A    | A    | G    | G    | G    |      |
|           | A   | 0.0         | 99.9 | 0.0  | 0.0  | 0.0  | 0.0  | 0.0  | 99.9 | 0.0  | 0.0  | 0.0 | 99.8 | 0.0  | 99.7 | 99.9 | 0.0  | 99.9 | 99.9 | 0.0  | 99.4 | 99.6 | 0.0  | 0.0  | 0.0  |
|           | C   | 0.0         | 0.0  | 0.0  | 0.0  | 99.8 | 99.8 | 0.0  | 0.0  | 0.0  | 99.8 | 0.0 | 0.0  | 0.1  | 0.0  | 0.0  | 0.0  | 0.0  | 0.0  | 0.0  | 0.0  | 0.0  | 0.0  | 0.0  | 0.0  |
|           | G   | 99.9        | 0.0  | 99.8 | 0.1  | 0.0  | 0.0  | 99.8 | 0.0  | 99.9 | 0.1  | 0.1 | 99.9 | 0.1  | 0.1  | 99.7 | 0.0  | 0.0  | 99.5 | 0.1  | 0.0  | 99.8 | 99.8 | 99.8 | 99.8 |
|           | T   | 0.0         | 0.0  | 0.1  | 99.7 | 0.2  | 0.1  | 0.1  | 0.0  | 0.1  | 0.1  | 0.0 | 0.0  | 0.0  | 0.0  | 0.0  | 0.0  | 0.2  | 0.0  | 0.0  | 0.1  | 0.1  | 0.0  | 0.1  | 0.1  |
| -         | 0.0 | 0.0         | 0.0  | 0.0  | 0.0  | 0.0  | 0.0  | 0.0  | 0.0  | 0.0  | 0.0  | 0.0 | 0.0  | 0.0  | 0.0  | 0.0  | 0.0  | 0.4  | 0.4  | 0.4  | 0.0  | 0.0  | 0.0  | 0.0  |      |

  

| evoA1-seB:imx | Replicate 1 | 1    |      |      | 5    |      |      | 10   |      |      | 15   |      |      | 20   |      |      | PAM  |      |      |      |      |      |      |
|---------------|-------------|------|------|------|------|------|------|------|------|------|------|------|------|------|------|------|------|------|------|------|------|------|------|
|               |             | G    | A    | G    | T    | C    | C    | G    | A    | G    | C    | A    | G    | A    | A    | G    | A    | A    | G    | G    | G    |      |      |
| A             | 0.5         | 99.7 | 0.1  | 0.0  | 0.4  | 0.2  | 0.0  | 99.6 | 0.0  | 1.1  | 99.6 | 0.0  | 99.8 | 99.8 | 0.1  | 99.8 | 99.8 | 0.0  | 99.7 | 99.8 | 0.0  | 0.0  | 0.0  |
| C             | 0.1         | 0.0  | 0.0  | 0.1  | 46.1 | 47.3 | 0.0  | 0.0  | 0.0  | 93.0 | 0.0  | 0.0  | 0.0  | 0.0  | 0.0  | 0.0  | 0.0  | 0.0  | 0.0  | 0.0  | 0.0  | 0.0  | 0.0  |
| G             | 99.1        | 0.0  | 99.6 | 2.1  | 1.5  | 0.5  | 99.5 | 0.0  | 99.5 | 0.2  | 0.0  | 99.7 | 0.0  | 0.0  | 99.7 | 0.0  | 0.0  | 99.7 | 0.0  | 0.0  | 99.9 | 99.9 | 99.9 |
| T             | 0.0         | 0.0  | 0.1  | 97.4 | 51.6 | 51.6 | 0.0  | 0.0  | 0.0  | 5.4  | 0.0  | 0.0  | 0.0  | 0.0  | 0.0  | 0.0  | 0.0  | 0.0  | 0.0  | 0.0  | 0.1  | 0.1  | 0.0  |
| -             | 0.3         | 0.3  | 0.3  | 0.4  | 0.4  | 0.4  | 0.4  | 0.4  | 0.4  | 0.4  | 0.3  | 0.3  | 0.2  | 0.2  | 0.2  | 0.2  | 0.1  | 0.1  | 0.3  | 0.2  | 0.2  | 0.0  | 0.0  |

  

| evoA1-seB:imx | Replicate 2 | G   | A    | G    | T    | C    | C    | G   | A    | G    | C   | A    | G    | A   | A    | G    | A   | A    | G    | A   | A    | G    | G    | G   |
|---------------|-------------|-----|------|------|------|------|------|-----|------|------|-----|------|------|-----|------|------|-----|------|------|-----|------|------|------|-----|
|               |             | A   | 0.4  | 99.7 | 0.1  | 0.0  | 0.5  | 0.3 | 0.1  | 99.7 | 0.0 | 0.0  | 99.7 | 0.0 | 99.7 | 99.8 | 0.1 | 99.9 | 99.9 | 0.0 | 99.7 | 99.8 | 0.0  | 0.0 |
| C             | 0.1         | 0.0 | 0.0  | 0.0  | 52.8 | 54.3 | 0.0  | 0.0 | 0.0  | 95.2 | 0.0 | 0.0  | 0.1  | 0.0 | 0.0  | 0.0  | 0.0 | 0.0  | 0.0  | 0.0 | 0.0  | 0.0  | 0.0  |     |
| G             | 99.3        | 0.0 | 99.5 | 0.2  | 1.6  | 0.4  | 99.6 | 0.0 | 99.6 | 0.1  | 0.1 | 99.7 | 0.1  | 0.1 | 99.7 | 0.0  | 0.0 | 99.7 | 0.0  | 0.0 | 99.9 | 99.9 | 99.8 |     |
| T             | 0.0         | 0.0 | 0.2  | 99.6 | 44.7 | 44.7 | 0.1  | 0.0 | 0.1  | 4.5  | 0.0 | 0.0  | 0.0  | 0.0 | 0.2  | 0.0  | 0.0 | 0.1  | 0.1  | 0.1 | 0.0  | 0.1  | 0.2  |     |
| -             | 0.2         | 0.2 | 0.2  | 0.2  | 0.3  | 0.3  | 0.3  | 0.3 | 0.3  | 0.2  | 0.2 | 0.2  | 0.2  | 0.1 | 0.1  | 0.1  | 0.1 | 0.1  | 0.2  | 0.2 | 0.0  | 0.0  | 0.0  |     |

  

| evoA1-seB:imx | Replicate 3 | G   | A    | G    | T    | C    | C    | G   | A    | G    | C   | A    | G    | A   | A    | G    | A   | A    | G    | A   | A    | G    | G    | G   |
|---------------|-------------|-----|------|------|------|------|------|-----|------|------|-----|------|------|-----|------|------|-----|------|------|-----|------|------|------|-----|
|               |             | A   | 0.5  | 99.8 | 0.0  | 0.0  | 0.6  | 0.1 | 0.0  | 99.8 | 0.0 | 0.1  | 99.6 | 0.0 | 99.6 | 99.8 | 0.0 | 99.8 | 99.8 | 0.0 | 99.5 | 99.7 | 0.0  | 0.0 |
| C             | 0.1         | 0.0 | 0.0  | 0.0  | 45.0 | 46.2 | 0.0  | 0.0 | 0.0  | 94.7 | 0.0 | 0.0  | 0.1  | 0.0 | 0.0  | 0.0  | 0.0 | 0.0  | 0.0  | 0.0 | 0.0  | 0.0  | 0.0  |     |
| G             | 99.3        | 0.1 | 99.6 | 0.1  | 1.4  | 0.5  | 99.7 | 0.0 | 99.7 | 0.1  | 0.1 | 99.8 | 0.1  | 0.1 | 99.7 | 0.0  | 0.0 | 99.6 | 0.0  | 0.0 | 99.9 | 99.8 | 99.7 |     |
| T             | 0.1         | 0.0 | 0.2  | 99.7 | 52.9 | 53.0 | 0.1  | 0.0 | 0.1  | 4.9  | 0.0 | 0.0  | 0.0  | 0.0 | 0.2  | 0.0  | 0.0 | 0.1  | 0.1  | 0.1 | 0.0  | 0.1  | 0.2  |     |
| -             | 0.1         | 0.1 | 0.1  | 0.1  | 0.2  | 0.2  | 0.2  | 0.2 | 0.2  | 0.2  | 0.2 | 0.2  | 0.1  | 0.1 | 0.1  | 0.1  | 0.1 | 0.1  | 0.3  | 0.3 | 0.3  | 0.1  | 0.1  |     |

  

| evoA1-seB:imx | T2A+Rap | 1    |      |      | 5    |      |      | 10   |      |      | 15   |      |      | 20   |      |      | PAM  |      |      |      |      |      |      |
|---------------|---------|------|------|------|------|------|------|------|------|------|------|------|------|------|------|------|------|------|------|------|------|------|------|
|               |         | G    | A    | G    | T    | C    | C    | G    | A    | G    | C    | A    | G    | A    | A    | G    | A    | A    | G    | G    | G    |      |      |
| A             | 0.1     | 99.9 | 0.0  | 0.1  | 0.1  | 0.0  | 0.0  | 99.9 | 0.0  | 0.1  | 99.8 | 0.0  | 99.9 | 99.9 | 0.0  | 99.9 | 99.9 | 0.0  | 99.8 | 99.8 | 0.0  | 0.0  | 0.0  |
| C             | 0.0     | 0.0  | 0.0  | 0.1  | 65.6 | 65.8 | 0.0  | 0.0  | 0.0  | 96.1 | 0.0  | 0.0  | 0.0  | 0.0  | 0.0  | 0.0  | 0.0  | 0.0  | 0.0  | 0.0  | 0.0  | 0.0  | 0.0  |
| G             | 99.8    | 0.0  | 99.9 | 1.7  | 0.3  | 0.0  | 99.9 | 0.0  | 99.8 | 0.2  | 0.0  | 99.9 | 0.0  | 0.0  | 99.9 | 0.0  | 0.0  | 99.8 | 0.0  | 0.0  | 99.9 | 99.9 | 99.9 |
| T             | 0.0     | 0.0  | 0.1  | 98.1 | 34.0 | 34.0 | 0.0  | 0.0  | 0.0  | 2.3  | 0.0  | 0.0  | 0.0  | 0.0  | 0.0  | 0.0  | 0.0  | 0.0  | 0.0  | 0.0  | 0.1  | 0.1  | 0.0  |
| -             | 0.0     | 0.0  | 0.0  | 0.1  | 0.1  | 0.1  | 0.1  | 0.1  | 0.1  | 0.1  | 0.1  | 0.1  | 0.1  | 0.1  | 0.1  | 0.1  | 0.1  | 0.0  | 0.2  | 0.2  | 0.2  | 0.0  | 0.0  |

  

| evoA1-seB:imx | T2A+Rap | G   | A    | G    | T    | C    | C    | G   | A    | G    | C   | A    | G    | A   | A    | G    | A   | A    | G    | A   | A    | G    | G    | G   |
|---------------|---------|-----|------|------|------|------|------|-----|------|------|-----|------|------|-----|------|------|-----|------|------|-----|------|------|------|-----|
|               |         | A   | 0.1  | 99.9 | 0.0  | 0.0  | 0.1  | 0.0 | 0.0  | 99.9 | 0.0 | 0.0  | 99.7 | 0.0 | 99.6 | 99.8 | 0.0 | 99.9 | 99.9 | 0.0 | 99.6 | 99.8 | 0.0  | 0.0 |
| C             | 0.0     | 0.0 | 0.0  | 0.1  | 72.9 | 73.2 | 0.0  | 0.0 | 0.0  | 97.8 | 0.0 | 0.0  | 0.1  | 0.0 | 0.0  | 0.0  | 0.0 | 0.0  | 0.0  | 0.0 | 0.0  | 0.0  | 0.0  |     |
| G             | 99.8    | 0.1 | 99.8 | 0.1  | 0.6  | 0.1  | 99.9 | 0.0 | 99.8 | 0.1  | 0.1 | 99.9 | 0.2  | 0.1 | 99.7 | 0.0  | 0.0 | 99.7 | 0.0  | 0.0 | 99.8 | 99.8 | 99.6 |     |
| T             | 0.1     | 0.0 | 0.2  | 99.7 | 26.4 | 26.7 | 0.1  | 0.0 | 0.1  | 2.1  | 0.1 | 0.0  | 0.0  | 0.1 | 0.2  | 0.0  | 0.0 | 0.2  | 0.2  | 0.0 | 0.1  | 0.2  | 0.3  |     |
| -             | 0.0     | 0.0 | 0.0  | 0.0  | 0.0  | 0.0  | 0.0  | 0.0 | 0.0  | 0.0  | 0.0 | 0.0  | 0.0  | 0.0 | 0.0  | 0.1  | 0.1 | 0.1  | 0.1  | 0.1 | 0.1  | 0.0  | 0.0  |     |

  

| evoA1-seB:imx | T2A+Rap | G   | A    | G    | T    | C    | C    | G   | A    | G    | C   | A    | G    | A   | A    | G    | A   | A    | G    | A   | A    | G    | G    | G   |
|---------------|---------|-----|------|------|------|------|------|-----|------|------|-----|------|------|-----|------|------|-----|------|------|-----|------|------|------|-----|
|               |         | A   | 0.0  | 99.9 | 0.0  | 0.0  | 0.0  | 0.0 | 0.0  | 99.9 | 0.0 | 0.0  | 99.8 | 0.0 | 99.6 | 99.8 | 0.0 | 99.9 | 99.9 | 0.0 | 99.6 | 99.8 | 0.0  | 0.0 |
| C             | 0.0     | 0.0 | 0.0  | 0.0  | 60.3 | 60.3 | 0.0  | 0.0 | 0.0  | 96.6 | 0.0 | 0.0  | 0.1  | 0.0 | 0.0  | 0.0  | 0.0 | 0.0  | 0.0  | 0.0 | 0.0  | 0.0  | 0.0  |     |
| G             | 99.8    | 0.0 | 99.8 | 0.1  | 0.6  | 0.1  | 99.8 | 0.0 | 99.9 | 0.0  | 0.1 | 99.9 | 0.2  | 0.1 | 99.8 | 0.0  | 0.0 | 99.6 | 0.1  | 0.0 | 99.9 | 99.8 | 99.7 |     |
| T             | 0.0     | 0.0 | 0.1  | 99.8 | 39.0 | 39.5 | 0.2  | 0.0 | 0.1  | 3.3  | 0.0 | 0.0  | 0.0  | 0.0 | 0.2  | 0.0  | 0.0 | 0.2  | 0.1  | 0.0 | 0.1  | 0.1  | 0.3  |     |
| -             | 0.0     | 0.0 | 0.1  | 0.1  | 0.1  | 0.1  | 0.1  | 0.1 | 0.1  | 0.1  | 0.1 | 0.1  | 0.0  | 0.0 | 0.0  | 0.0  | 0.0 | 0.2  | 0.2  | 0.2 | 0.0  | 0.0  | 0.0  |     |

  

| evoA1-seB:imx | T2A+Rap | 1    |      |      | 5    |      |       | 10   |      |      | 15   |      |      | 20   |      |      | PAM  |      |      |      |      |      |      |
|---------------|---------|------|------|------|------|------|-------|------|------|------|------|------|------|------|------|------|------|------|------|------|------|------|------|
|               |         | G    | A    | G    | T    | C    | C     | G    | A    | G    | C    | A    | G    | A    | A    | G    | A    | A    | G    | G    | G    |      |      |
| A             | 0.0     | 99.9 | 0.0  | 0.0  | 0.0  | 0.0  | 0.0   | 99.9 | 0.0  | 1.3  | 99.9 | 0.0  | 99.9 | 99.9 | 0.0  | 99.9 | 99.9 | 0.0  | 99.7 | 99.8 | 0.0  | 0.0  | 0.0  |
| C             | 0.0     | 0.0  | 0.0  | 0.1  | 94.6 | 94.8 | 0.0   | 0.0  | 0.0  | 98.2 | 0.0  | 0.0  | 0.0  | 0.0  | 0.0  | 0.0  | 0.0  | 0.0  | 0.0  | 0.0  | 0.0  | 0.0  | 0.0  |
| G             | 100.0   | 0.1  | 99.9 | 1.9  | 0.0  | 0.0  | 100.0 | 0.0  | 99.9 | 0.2  | 0.0  | 99.9 | 0.0  | 0.0  | 99.9 | 0.0  | 0.0  | 99.8 | 0.0  | 0.0  | 99.8 | 99.8 | 99.9 |
| T             | 0.0     | 0.0  | 0.1  | 97.9 | 5.3  | 5.1  | 0.0   | 0.0  | 0.0  | 0.3  | 0.0  | 0.0  | 0.0  | 0.0  | 0.0  | 0.0  | 0.0  | 0.0  | 0.0  | 0.0  | 0.1  | 0.1  | 0.0  |
| -             | 0.0     | 0.0  | 0.0  | 0.0  | 0.0  | 0.0  | 0.0   | 0.0  | 0.0  | 0.0  | 0.0  | 0.0  | 0.0  | 0.0  | 0.0  | 0.0  | 0.0  | 0.0  | 0.2  | 0.2  | 0.2  | 0.0  | 0.0  |

  

| evoA1-seB:imx | T2A+Rap | G   | A    | G    | T    | C    | C    | G   | A    | G     | C   | A     | G    | A   | A    | G    | A   | A     | G    | A   | A    | G    | G    | G   |
|---------------|---------|-----|------|------|------|------|------|-----|------|-------|-----|-------|------|-----|------|------|-----|-------|------|-----|------|------|------|-----|
|               |         | A   | 0.0  | 99.9 | 0.0  | 0.1  | 0.0  | 0.0 | 0.0  | 100.0 | 0.0 | 0.0   | 99.8 | 0.0 | 99.7 | 99.9 | 0.0 | 100.0 | 99.9 | 0.0 | 99.6 | 99.8 | 0.0  | 0.0 |
| C             | 0.0     | 0.0 | 0.0  | 0.1  | 96.0 | 96.2 | 0.0  | 0.0 | 0.0  | 99.7  | 0.0 | 0.0   | 0.1  | 0.0 | 0.0  | 0.0  | 0.0 | 0.0   | 0.0  | 0.0 | 0.0  | 0.0  | 0.0  |     |
| G             | 99.9    | 0.0 | 99.8 | 0.2  | 0.1  | 0.0  | 99.8 | 0.0 | 99.9 | 0.0   | 0.1 | 100.0 | 0.1  | 0.0 | 99.7 | 0.0  | 0.1 | 99.6  | 0.0  | 0.0 | 99.9 | 99.7 | 99.6 |     |
| T             | 0.0     | 0.0 | 0.2  | 99.7 | 3.9  | 3.8  | 0.1  | 0.0 | 0.1  | 0.2   | 0.0 | 0.0   | 0.0  | 0.0 | 0.2  | 0.0  | 0.0 | 0.2   | 0.2  | 0.0 | 0.0  | 0.2  | 0.3  |     |
| -             | 0.0     | 0.0 | 0.0  | 0.0  | 0.0  | 0.0  | 0.0  | 0.0 | 0.0  | 0.0   | 0.0 | 0.0   | 0.0  | 0.0 | 0.0  | 0.0  | 0.0 | 0.2   | 0.2  | 0.2 | 0.0  | 0.0  | 0.0  |     |

  

| evoA1-seB:imx | T2A+Rap | G   | A    | G    | T    | C    | C    | G   | A    | G    | C   | A     | G    | A   | A    | G    | A   | A    | G    | A   | A    | G    | G    | G   |
|---------------|---------|-----|------|------|------|------|------|-----|------|------|-----|-------|------|-----|------|------|-----|------|------|-----|------|------|------|-----|
|               |         | A   | 0.0  | 99.9 | 0.0  | 0.0  | 0.0  | 0.0 | 0.0  | 99.9 | 0.0 | 0.0   | 99.8 | 0.0 | 99.7 | 99.9 | 0.0 | 99.9 | 99.9 | 0.0 | 99.6 | 99.7 | 0.0  | 0.0 |
| C             | 0.0     | 0.0 | 0.0  | 0.0  | 94.8 | 94.9 | 0.0  | 0.0 | 0.0  | 99.7 | 0.0 | 0.0   | 0.1  | 0.0 | 0.0  | 0.0  | 0.0 | 0.0  | 0.0  | 0.0 | 0.0  | 0.0  | 0.0  |     |
| G             | 99.9    | 0.1 | 99.8 | 0.2  | 0.1  | 0.0  | 99.9 | 0.0 | 99.8 | 0.1  | 0.1 | 100.0 | 0.2  | 0.1 | 99.9 | 0.0  | 0.0 | 99.6 | 0.0  | 0.0 | 99.8 | 99.8 | 99.7 |     |
| T             | 0.0     | 0.0 | 0.1  | 99.7 | 5.1  | 5.0  | 0.1  | 0.0 | 0.1  | 0.2  | 0.0 | 0.0   | 0.0  | 0.0 | 0.1  | 0.0  | 0.1 | 0.1  | 0.1  | 0.0 | 0.1  | 0.1  | 0.2  |     |
| -             | 0.0     | 0.0 | 0.0  | 0.0  | 0.0  | 0.0  | 0.0  | 0.0 | 0.0  | 0.0  | 0.0 | 0.0   | 0.0  | 0.0 | 0.0  | 0.0  | 0.1 | 0.1  | 0.3  | 0.3 | 0.3  | 0.1  | 0.0  |     |





Supplementary Figure 1

| <i>k</i>  |     | FANCF |       |      |       |      |      |      |      |     |      |       |     |      |      |     |      |       |     |       |       |     |     |       |      |
|-----------|-----|-------|-------|------|-------|------|------|------|------|-----|------|-------|-----|------|------|-----|------|-------|-----|-------|-------|-----|-----|-------|------|
|           |     | E2    |       |      | S3    |      |      | L4   |      |     | L5   |       |     | Q6   |      |     | H7   |       |     | L8    |       |     |     |       |      |
| untreated |     | G     | G     | A    | A     | T    | C    | C    | C    | T   | T    | C     | T   | G    | C    | A   | G    | C     | A   | C     | C     | T   | G   | G     |      |
|           | A   | 0.0   | 0.0   | 99.9 | 100.0 | 0.0  | 0.0  | 0.0  | 0.0  | 0.0 | 0.0  | 0.0   | 0.0 | 0.0  | 0.0  | 0.0 | 99.9 | 0.0   | 0.0 | 100.0 | 0.0   | 0.0 | 0.0 | 0.0   | 0.1  |
|           | C   | 0.0   | 0.0   | 0.0  | 0.0   | 0.0  | 99.9 | 99.9 | 99.9 | 0.0 | 0.0  | 99.9  | 0.0 | 0.0  | 99.9 | 0.0 | 0.0  | 100.0 | 0.0 | 100.0 | 100.0 | 0.0 | 0.0 | 0.0   | 0.0  |
|           | G   | 100.0 | 100.0 | 0.1  | 0.0   | 0.0  | 0.0  | 0.0  | 0.0  | 0.0 | 0.0  | 0.0   | 0.0 | 99.9 | 0.0  | 0.0 | 99.9 | 0.0   | 0.0 | 0.0   | 0.0   | 0.0 | 0.0 | 100.0 | 99.9 |
|           | T   | 0.0   | 0.0   | 0.0  | 0.0   | 99.9 | 0.1  | 0.1  | 0.1  | 0.0 | 99.9 | 100.0 | 0.0 | 99.9 | 0.0  | 0.1 | 0.0  | 0.0   | 0.0 | 0.0   | 0.0   | 0.0 | 0.0 | 99.9  | 0.0  |
| -         | 0.0 | 0.0   | 0.0   | 0.0  | 0.0   | 0.0  | 0.0  | 0.0  | 0.0  | 0.0 | 0.0  | 0.0   | 0.0 | 0.0  | 0.0  | 0.0 | 0.0  | 0.0   | 0.0 | 0.0   | 0.0   | 0.0 | 0.0 | 0.0   |      |

  

|                           |   | PAM  |      |      |      |      |      |      |      |      |      |      |      |      |      |     |      |      |     |      |      |     |      |      |      |
|---------------------------|---|------|------|------|------|------|------|------|------|------|------|------|------|------|------|-----|------|------|-----|------|------|-----|------|------|------|
|                           |   | I    | 5    | 10   | 15   | 20   | T    | G    | T    | C    | T    | A    | G    | C    | A    | C   | T    | G    | G   |      |      |     |      |      |      |
| evoA1-seBE<br>Replicate 1 | A | 0.1  | 0.1  | 98.3 | 98.1 | 0.0  | 0.1  | 0.2  | 0.2  | 0.0  | 0.0  | 0.0  | 0.0  | 98.6 | 0.0  | 0.0 | 99.0 | 0.0  | 0.0 | 0.0  | 0.0  | 0.0 | 0.0  | 0.0  | 0.0  |
|                           | C | 0.0  | 0.0  | 0.0  | 0.0  | 0.0  | 64.1 | 64.8 | 64.5 | 0.0  | 0.0  | 72.9 | 0.0  | 0.0  | 96.3 | 0.0 | 0.0  | 98.1 | 0.0 | 99.3 | 99.3 | 0.0 | 0.0  | 0.0  | 0.0  |
|                           | G | 98.6 | 98.4 | 0.0  | 0.0  | 0.0  | 0.1  | 0.2  | 0.2  | 0.0  | 0.0  | 0.1  | 0.0  | 98.1 | 0.0  | 0.0 | 98.6 | 0.0  | 0.0 | 0.0  | 0.0  | 0.0 | 0.0  | 99.7 | 99.7 |
|                           | T | 0.0  | 0.0  | 0.0  | 0.0  | 98.1 | 33.6 | 32.5 | 32.6 | 97.9 | 97.9 | 24.3 | 97.9 | 0.0  | 2.1  | 0.0 | 0.0  | 0.8  | 0.0 | 0.0  | 0.0  | 0.0 | 99.3 | 0.0  | 0.0  |
|                           | - | 1.3  | 1.5  | 1.6  | 1.8  | 1.9  | 2.0  | 2.4  | 2.5  | 2.0  | 2.1  | 2.6  | 2.1  | 1.9  | 1.5  | 1.4 | 1.3  | 1.1  | 0.9 | 0.7  | 0.7  | 0.6 | 0.2  | 0.0  | 0.2  |

  

|                           |   | PAM  |      |      |      |      |      |      |      |      |      |      |      |      |      |     |      |      |     |      |      |     |      |      |      |
|---------------------------|---|------|------|------|------|------|------|------|------|------|------|------|------|------|------|-----|------|------|-----|------|------|-----|------|------|------|
|                           |   | I    | 5    | 10   | 15   | 20   | T    | G    | T    | C    | T    | A    | G    | C    | A    | C   | T    | G    | G   |      |      |     |      |      |      |
| evoA1-seBE<br>Replicate 2 | A | 0.1  | 0.2  | 98.7 | 98.6 | 0.0  | 0.1  | 0.3  | 0.2  | 0.0  | 0.0  | 0.1  | 0.0  | 0.0  | 99.1 | 0.0 | 0.0  | 99.3 | 0.0 | 0.0  | 0.0  | 0.0 | 0.0  | 0.0  | 0.0  |
|                           | C | 0.0  | 0.0  | 0.0  | 0.0  | 0.1  | 66.8 | 67.6 | 67.4 | 0.1  | 0.0  | 75.8 | 0.0  | 0.0  | 97.4 | 0.0 | 0.0  | 98.5 | 0.1 | 99.6 | 99.6 | 0.0 | 0.0  | 0.0  | 0.0  |
|                           | G | 98.8 | 98.6 | 0.0  | 0.0  | 0.0  | 0.1  | 0.2  | 0.2  | 0.0  | 0.0  | 0.1  | 0.0  | 98.8 | 0.0  | 0.0 | 99.1 | 0.0  | 0.1 | 0.0  | 0.0  | 0.0 | 0.0  | 99.8 | 99.8 |
|                           | T | 0.0  | 0.0  | 0.0  | 0.0  | 98.4 | 31.4 | 30.0 | 30.1 | 98.2 | 98.2 | 21.9 | 98.5 | 0.0  | 1.7  | 0.0 | 0.0  | 0.7  | 0.0 | 0.0  | 0.0  | 0.0 | 99.6 | 0.0  | 0.0  |
|                           | - | 1.1  | 1.2  | 1.3  | 1.4  | 1.5  | 1.6  | 1.9  | 2.1  | 1.7  | 1.7  | 2.1  | 1.5  | 1.1  | 1.0  | 0.9 | 0.8  | 0.8  | 0.6 | 0.4  | 0.4  | 0.4 | 0.2  | 0.0  | 0.2  |

  

|                           |   | PAM  |      |      |      |      |      |      |      |      |      |      |      |      |      |     |      |      |     |      |      |     |      |      |      |
|---------------------------|---|------|------|------|------|------|------|------|------|------|------|------|------|------|------|-----|------|------|-----|------|------|-----|------|------|------|
|                           |   | I    | 5    | 10   | 15   | 20   | T    | G    | T    | C    | T    | A    | G    | C    | A    | C   | T    | G    | G   |      |      |     |      |      |      |
| evoA1-seBE<br>Replicate 3 | A | 0.2  | 0.1  | 98.6 | 98.5 | 0.0  | 0.2  | 0.2  | 0.2  | 0.0  | 0.0  | 0.0  | 0.0  | 0.0  | 98.8 | 0.0 | 0.0  | 99.2 | 0.0 | 0.0  | 0.0  | 0.0 | 0.0  | 0.0  | 0.0  |
|                           | C | 0.0  | 0.0  | 0.0  | 0.0  | 0.0  | 59.5 | 60.5 | 60.2 | 0.0  | 0.0  | 69.7 | 0.0  | 0.0  | 96.7 | 0.0 | 0.0  | 98.1 | 0.0 | 99.5 | 99.6 | 0.0 | 0.0  | 0.0  | 0.0  |
|                           | G | 98.7 | 98.5 | 0.0  | 0.0  | 0.0  | 0.1  | 0.2  | 0.3  | 0.0  | 0.0  | 0.1  | 0.1  | 98.4 | 0.0  | 0.0 | 99.0 | 0.0  | 0.0 | 0.0  | 0.0  | 0.0 | 0.0  | 99.8 | 99.8 |
|                           | T | 0.0  | 0.1  | 0.0  | 0.0  | 98.4 | 38.3 | 36.7 | 36.8 | 97.9 | 98.0 | 27.7 | 98.2 | 0.0  | 2.1  | 0.0 | 0.0  | 0.9  | 0.1 | 0.0  | 0.0  | 0.0 | 99.5 | 0.0  | 0.0  |
|                           | - | 1.1  | 1.3  | 1.4  | 1.5  | 1.6  | 2.0  | 2.3  | 2.4  | 2.0  | 2.0  | 2.4  | 1.7  | 1.5  | 1.3  | 1.2 | 1.0  | 0.9  | 0.7 | 0.5  | 0.4  | 0.4 | 0.2  | 0.0  | 0.2  |

  

|                                      |   | PAM  |      |      |      |      |      |      |      |      |      |      |      |      |      |     |      |      |     |      |      |     |       |      |     |
|--------------------------------------|---|------|------|------|------|------|------|------|------|------|------|------|------|------|------|-----|------|------|-----|------|------|-----|-------|------|-----|
|                                      |   | I    | 5    | 10   | 15   | 20   | T    | G    | T    | C    | T    | A    | G    | C    | A    | C   | T    | G    | G   |      |      |     |       |      |     |
| evoA1-seBE<br>T2A+Rap<br>Replicate 1 | A | 0.0  | 0.0  | 99.7 | 99.6 | 0.0  | 0.0  | 0.0  | 0.1  | 0.0  | 0.0  | 0.0  | 0.0  | 0.0  | 99.7 | 0.0 | 0.0  | 99.8 | 0.0 | 0.0  | 0.0  | 0.0 | 0.0   | 0.0  | 0.0 |
|                                      | C | 0.0  | 0.0  | 0.0  | 0.0  | 0.0  | 83.1 | 83.5 | 83.1 | 0.0  | 0.0  | 90.1 | 0.0  | 0.0  | 99.2 | 0.0 | 0.0  | 99.5 | 0.0 | 99.8 | 99.8 | 0.0 | 0.0   | 0.0  | 0.0 |
|                                      | G | 99.7 | 99.6 | 0.0  | 0.0  | 0.0  | 0.0  | 0.1  | 0.1  | 0.0  | 0.0  | 0.1  | 0.0  | 99.6 | 0.0  | 0.0 | 99.7 | 0.0  | 0.0 | 0.0  | 0.0  | 0.0 | 100.0 | 99.9 |     |
|                                      | T | 0.0  | 0.0  | 0.0  | 0.0  | 99.6 | 16.4 | 15.8 | 16.2 | 99.6 | 99.5 | 9.3  | 99.6 | 0.0  | 0.5  | 0.0 | 0.0  | 0.2  | 0.0 | 0.0  | 0.0  | 0.0 | 99.8  | 0.0  | 0.0 |
|                                      | - | 0.3  | 0.3  | 0.3  | 0.3  | 0.4  | 0.4  | 0.5  | 0.6  | 0.4  | 0.4  | 0.5  | 0.4  | 0.4  | 0.3  | 0.3 | 0.3  | 0.3  | 0.2 | 0.1  | 0.1  | 0.1 | 0.0   | 0.0  | 0.0 |

  

|                                      |   | PAM  |      |      |      |      |      |      |      |      |      |      |      |      |      |     |      |      |     |      |      |     |      |      |      |
|--------------------------------------|---|------|------|------|------|------|------|------|------|------|------|------|------|------|------|-----|------|------|-----|------|------|-----|------|------|------|
|                                      |   | I    | 5    | 10   | 15   | 20   | T    | G    | T    | C    | T    | A    | G    | C    | A    | C   | T    | G    | G   |      |      |     |      |      |      |
| evoA1-seBE<br>T2A+Rap<br>Replicate 2 | A | 0.0  | 0.0  | 99.6 | 99.6 | 0.0  | 0.0  | 0.1  | 0.0  | 0.0  | 0.0  | 0.0  | 0.0  | 0.0  | 99.8 | 0.0 | 0.0  | 99.8 | 0.0 | 0.0  | 0.0  | 0.0 | 0.0  | 0.0  | 0.0  |
|                                      | C | 0.0  | 0.0  | 0.0  | 0.0  | 0.0  | 86.3 | 86.5 | 86.6 | 0.0  | 0.0  | 93.0 | 0.0  | 0.0  | 99.3 | 0.0 | 0.0  | 99.7 | 0.0 | 99.8 | 99.8 | 0.0 | 0.0  | 0.0  | 0.0  |
|                                      | G | 99.7 | 99.6 | 0.0  | 0.0  | 0.0  | 0.0  | 0.1  | 0.1  | 0.0  | 0.0  | 0.1  | 0.0  | 99.7 | 0.0  | 0.0 | 99.7 | 0.0  | 0.0 | 0.0  | 0.0  | 0.0 | 0.0  | 99.9 | 99.9 |
|                                      | T | 0.1  | 0.0  | 0.0  | 0.0  | 99.6 | 13.2 | 12.8 | 12.8 | 99.6 | 99.6 | 6.4  | 99.6 | 0.0  | 0.4  | 0.0 | 0.0  | 0.1  | 0.0 | 0.0  | 0.0  | 0.0 | 99.8 | 0.0  | 0.0  |
|                                      | - | 0.3  | 0.3  | 0.3  | 0.4  | 0.4  | 0.4  | 0.5  | 0.5  | 0.4  | 0.4  | 0.5  | 0.3  | 0.3  | 0.3  | 0.2 | 0.2  | 0.2  | 0.2 | 0.2  | 0.2  | 0.1 | 0.1  | 0.1  | 0.1  |

  

|                                      |   | PAM  |      |      |      |      |      |      |      |      |      |      |      |      |      |     |      |      |     |      |      |     |      |      |      |
|--------------------------------------|---|------|------|------|------|------|------|------|------|------|------|------|------|------|------|-----|------|------|-----|------|------|-----|------|------|------|
|                                      |   | I    | 5    | 10   | 15   | 20   | T    | G    | T    | C    | T    | A    | G    | C    | A    | C   | T    | G    | G   |      |      |     |      |      |      |
| evoA1-seBE<br>T2A+Rap<br>Replicate 3 | A | 0.1  | 0.0  | 99.6 | 99.6 | 0.0  | 0.1  | 0.1  | 0.1  | 0.0  | 0.0  | 0.0  | 0.0  | 0.0  | 99.7 | 0.1 | 0.0  | 99.8 | 0.0 | 0.0  | 0.0  | 0.0 | 0.0  | 0.0  | 0.0  |
|                                      | C | 0.0  | 0.0  | 0.0  | 0.0  | 0.1  | 77.9 | 78.3 | 77.9 | 0.0  | 0.0  | 87.5 | 0.0  | 0.0  | 99.1 | 0.0 | 0.0  | 99.5 | 0.0 | 99.8 | 99.8 | 0.0 | 0.0  | 0.0  | 0.0  |
|                                      | G | 99.6 | 99.6 | 0.0  | 0.0  | 0.0  | 0.1  | 0.1  | 0.2  | 0.0  | 0.0  | 0.0  | 0.0  | 99.6 | 0.0  | 0.0 | 99.5 | 0.0  | 0.0 | 0.0  | 0.0  | 0.0 | 0.0  | 99.9 | 99.9 |
|                                      | T | 0.0  | 0.0  | 0.0  | 0.0  | 99.5 | 21.4 | 21.0 | 21.3 | 99.5 | 99.5 | 11.9 | 99.5 | 0.1  | 0.5  | 0.0 | 0.0  | 0.1  | 0.0 | 0.0  | 0.0  | 0.0 | 99.8 | 0.0  | 0.0  |
|                                      | - | 0.3  | 0.3  | 0.3  | 0.4  | 0.4  | 0.5  | 0.5  | 0.5  | 0.5  | 0.4  | 0.6  | 0.4  | 0.4  | 0.3  | 0.3 | 0.4  | 0.4  | 0.3 | 0.2  | 0.2  | 0.2 | 0.2  | 0.1  | 0.1  |

  

|                                      |   | PAM  |       |       |       |       |      |      |      |       |      |      |      |      |      |     |      |      |     |       |       |     |      |      |      |
|--------------------------------------|---|------|-------|-------|-------|-------|------|------|------|-------|------|------|------|------|------|-----|------|------|-----|-------|-------|-----|------|------|------|
|                                      |   | I    | 5     | 10    | 15    | 20    | T    | G    | T    | C     | T    | A    | G    | C    | A    | C   | T    | G    | G   |       |       |     |      |      |      |
| evoA1-seBE<br>T2A+Rap<br>Replicate 1 | A | 0.0  | 0.0   | 100.0 | 100.0 | 0.0   | 0.0  | 0.0  | 0.0  | 0.0   | 0.0  | 0.0  | 0.0  | 0.0  | 99.9 | 0.0 | 0.0  | 99.9 | 0.0 | 0.0   | 0.0   | 0.0 | 0.0  | 0.0  | 0.0  |
|                                      | C | 0.0  | 0.0   | 0.0   | 0.0   | 0.0   | 97.0 | 97.2 | 97.0 | 0.0   | 0.0  | 99.5 | 0.0  | 0.0  | 99.9 | 0.0 | 0.0  | 99.9 | 0.0 | 100.0 | 100.0 | 0.1 | 0.0  | 0.0  | 0.0  |
|                                      | G | 99.9 | 100.0 | 0.0   | 0.0   | 0.0   | 0.0  | 0.0  | 0.0  | 0.0   | 0.0  | 0.0  | 0.0  | 99.9 | 0.0  | 0.0 | 99.9 | 0.0  | 0.0 | 0.0   | 0.0   | 0.0 | 0.0  | 99.9 | 99.9 |
|                                      | T | 0.0  | 0.0   | 0.0   | 0.0   | 100.0 | 3.0  | 2.8  | 2.9  | 100.0 | 99.9 | 0.5  | 99.9 | 0.0  | 0.0  | 0.0 | 0.0  | 0.0  | 0.0 | 0.0   | 0.0   | 0.0 | 99.9 | 0.0  | 0.0  |
|                                      | - | 0.0  | 0.0   | 0.0   | 0.0   | 0.0   | 0.0  | 0.0  | 0.0  | 0.0   | 0.1  | 0.1  | 0.0  | 0.0  | 0.0  | 0.0 | 0.0  | 0.1  | 0.0 | 0.0   | 0.0   | 0.0 | 0.0  | 0.0  | 0.0  |

  

|                                      |   | PAM  |      |      |      |      |      |      |      |      |      |      |      |      |      |     |      |      |     |      |      |     |      |      |     |
|--------------------------------------|---|------|------|------|------|------|------|------|------|------|------|------|------|------|------|-----|------|------|-----|------|------|-----|------|------|-----|
|                                      |   | I    | 5    | 10   | 15   | 20   | T    | G    | T    | C    | T    | A    | G    | C    | A    | C   | T    | G    | G   |      |      |     |      |      |     |
| evoA1-seBE<br>T2A+Rap<br>Replicate 2 | A | 0.0  | 0.0  | 99.9 | 99.9 | 0.0  | 0.0  | 0.1  | 0.1  | 0.0  | 0.0  | 0.0  | 0.0  | 0.0  | 99.9 | 0.0 | 0.0  | 99.9 | 0.0 | 0.0  | 0.0  | 0.0 | 0.0  | 0.0  | 0.1 |
|                                      | C | 0.0  | 0.0  | 0.0  | 0.0  | 0.0  | 96.7 | 96.9 | 96.8 | 0.0  | 0.0  | 99.3 | 0.0  | 0.0  | 99.8 | 0.0 | 0.0  | 99.8 | 0.0 | 99.9 | 99.9 | 0.0 | 0.0  | 0.0  | 0.0 |
|                                      | G | 99.9 | 99.9 | 0.0  | 0.0  | 0.0  | 0.0  | 0.0  | 0.0  | 0.0  | 0.0  | 0.0  | 0.0  | 99.9 | 0.0  | 0.0 | 99.9 | 0.0  | 0.0 | 0.0  | 0.0  | 0.1 | 99.9 | 99.8 |     |
|                                      | T | 0.0  | 0.0  | 0.0  | 0.0  | 99.9 | 3.2  | 2.9  | 3.0  | 99.9 | 99.9 | 0.6  | 99.8 | 0.0  | 0.1  | 0.1 | 0.0  | 0.1  | 0.0 | 0.0  | 0.0  | 0.0 | 99.8 | 0.0  | 0.0 |
|                                      | - | 0.1  | 0.1  | 0.1  | 0.1  | 0.1  | 0.1  | 0.1  | 0.2  | 0.0  | 0.1  | 0.1  | 0.1  | 0.1  | 0.1  | 0.1 | 0.1  | 0.1  | 0.1 | 0.1  | 0.1  | 0.1 | 0.1  | 0.1  | 0.1 |

  

|                                      |   | PAM   |      |      |      |      |      |      |      |      |      |      |      |      |      |     |      |      |     |      |      |     |      |      |      |
|--------------------------------------|---|-------|------|------|------|------|------|------|------|------|------|------|------|------|------|-----|------|------|-----|------|------|-----|------|------|------|
|                                      |   | I     | 5    | 10   | 15   | 20   | T    | G    | T    | C    | T    | A    | G    | C    | A    | C   | T    | G    | G   |      |      |     |      |      |      |
| evoA1-seBE<br>T2A+Rap<br>Replicate 3 | A | 0.0   | 0.0  | 99.9 | 99.9 | 0.0  | 0.0  | 0.1  | 0.0  | 0.0  | 0.0  | 0.0  | 0.0  | 0.0  | 99.9 | 0.0 | 0.0  | 99.9 | 0.0 | 0.0  | 0.0  | 0.0 | 0.0  | 0.0  | 0.0  |
|                                      | C | 0.0   | 0.0  | 0.0  | 0.0  | 0.0  | 96.3 | 96.5 | 96.4 | 0.0  | 0.0  | 99.0 | 0.0  | 0.0  | 99.9 | 0.0 | 0.0  | 99.9 | 0.0 | 99.9 | 99.9 | 0.0 | 0.0  | 0.0  | 0.0  |
|                                      | G | 100.0 | 99.9 | 0.0  | 0.0  | 0.0  | 0.0  | 0.0  | 0.0  | 0.0  | 0.0  | 0.0  | 0.0  | 99.9 | 0.0  | 0.0 | 99.9 | 0.0  | 0.0 | 0.0  | 0.0  | 0.0 | 0.0  | 99.9 | 99.9 |
|                                      | T | 0.0   | 0.0  | 0.0  | 0.0  | 99.9 | 3.6  | 3.4  | 3.4  | 99.9 | 99.9 | 0.8  | 99.8 | 0.0  | 0.0  | 0.0 | 0.1  | 0.0  | 0.0 | 0.0  | 0.0  | 0.0 | 99.9 | 0.0  | 0.   |

# Supplementary Figure 1

| I                                |     | FANCF_OTI |      |      |      |      |      |       |      |      |      |      |      |      |      |      |      |      |      |      |      |      |     |      |      |      |      |      |      |
|----------------------------------|-----|-----------|------|------|------|------|------|-------|------|------|------|------|------|------|------|------|------|------|------|------|------|------|-----|------|------|------|------|------|------|
| untreated                        |     | C         | C    | T    | G    | G    | T    | G     | C    | T    | G    | C    | A    | G    | A    | C    | G    | G    | G    | G    | T    | T    | C   | C    | C    | C    | C    | C    |      |
|                                  | A   | 0.0       | 0.0  | 0.0  | 0.0  | 0.0  | 0.0  | 0.0   | 0.0  | 0.0  | 0.1  | 0.0  | 99.9 | 0.0  | 99.8 | 0.0  | 0.0  | 0.0  | 0.1  | 0.0  | 0.0  | 0.0  | 0.1 | 0.0  | 0.0  | 0.0  | 0.1  | 0.0  | 0.0  |
|                                  | C   | 99.7      | 99.8 | 0.2  | 0.0  | 0.0  | 0.0  | 0.0   | 99.9 | 0.0  | 0.0  | 99.9 | 0.0  | 0.0  | 99.8 | 0.0  | 0.0  | 0.0  | 0.0  | 0.0  | 0.0  | 0.0  | 0.0 | 0.0  | 0.1  | 99.9 | 99.9 | 0.0  | 0.0  |
|                                  | G   | 0.1       | 0.1  | 0.1  | 99.9 | 99.9 | 0.2  | 100.0 | 0.0  | 0.2  | 99.8 | 0.0  | 0.0  | 99.8 | 0.1  | 0.0  | 99.9 | 99.6 | 99.6 | 99.7 | 0.0  | 0.3  | 0.0 | 0.0  | 0.0  | 0.0  | 0.0  | 0.0  | 0.0  |
|                                  | T   | 0.1       | 0.1  | 99.6 | 0.0  | 0.0  | 99.8 | 0.0   | 0.1  | 99.8 | 0.1  | 0.0  | 0.0  | 0.1  | 0.0  | 0.1  | 0.0  | 0.2  | 0.3  | 0.2  | 99.9 | 99.4 | 0.1 | 0.0  | 0.0  | 0.0  | 0.0  | 0.0  | 0.0  |
| -                                | 0.0 | 0.0       | 0.0  | 0.0  | 0.0  | 0.0  | 0.0  | 0.0   | 0.0  | 0.0  | 0.0  | 0.0  | 0.0  | 0.0  | 0.0  | 0.0  | 0.0  | 0.0  | 0.0  | 0.0  | 0.0  | 0.0  | 0.0 | 0.0  | 0.0  | 0.0  | 0.0  | 0.0  |      |
| evoA1-seBE: T2A +Rap Replicate 1 |     | C         | C    | T    | G    | G    | T    | G     | C    | T    | G    | C    | A    | G    | A    | C    | G    | G    | G    | G    | T    | T    | C   | C    | C    | C    | C    | C    | C    |
|                                  | A   | 0.0       | 0.0  | 0.0  | 0.1  | 0.0  | 0.0  | 0.0   | 0.0  | 0.0  | 0.3  | 0.0  | 99.8 | 4.8  | 99.8 | 0.0  | 7.6  | 7.5  | 8.1  | 4.4  | 0.0  | 0.0  | 0.0 | 0.0  | 0.0  | 0.0  | 0.1  | 0.0  | 0.0  |
|                                  | C   | 99.9      | 99.9 | 0.1  | 0.0  | 0.0  | 0.0  | 0.0   | 99.8 | 0.0  | 0.0  | 99.9 | 0.0  | 0.0  | 0.0  | 99.7 | 0.0  | 0.0  | 0.0  | 0.0  | 0.0  | 0.0  | 0.0 | 0.0  | 0.0  | 0.0  | 0.0  | 99.7 | 99.8 |
|                                  | G   | 0.0       | 0.0  | 0.0  | 99.8 | 99.8 | 0.0  | 99.9  | 0.0  | 0.0  | 99.6 | 0.0  | 0.0  | 94.9 | 0.0  | 0.0  | 92.2 | 92.2 | 91.6 | 95.3 | 0.0  | 0.0  | 0.0 | 0.0  | 0.0  | 0.0  | 0.0  | 0.0  | 0.0  |
|                                  | T   | 0.0       | 0.0  | 99.8 | 0.0  | 0.1  | 99.9 | 0.0   | 0.1  | 99.9 | 0.0  | 0.0  | 0.0  | 0.0  | 0.0  | 0.0  | 0.0  | 0.0  | 0.1  | 0.0  | 99.8 | 99.8 | 0.0 | 0.0  | 0.0  | 0.0  | 0.0  | 0.0  | 0.0  |
| -                                | 0.1 | 0.1       | 0.1  | 0.1  | 0.1  | 0.1  | 0.1  | 0.1   | 0.1  | 0.1  | 0.1  | 0.1  | 0.2  | 0.2  | 0.2  | 0.2  | 0.2  | 0.2  | 0.2  | 0.2  | 0.2  | 0.2  | 0.2 | 0.2  | 0.2  | 0.2  | 0.2  | 0.2  | 0.2  |
| evoA1-seBE: T2A +Rap Replicate 2 |     | C         | C    | T    | G    | G    | T    | G     | C    | T    | G    | C    | A    | G    | A    | C    | G    | G    | G    | G    | T    | T    | C   | C    | C    | C    | C    | C    | C    |
|                                  | A   | 0.0       | 0.0  | 0.0  | 0.0  | 0.0  | 0.0  | 0.1   | 0.0  | 0.0  | 0.0  | 0.0  | 99.8 | 4.8  | 99.6 | 0.0  | 9.1  | 8.7  | 9.7  | 4.5  | 0.0  | 0.1  | 0.0 | 0.0  | 0.0  | 0.0  | 0.1  | 0.0  | 0.0  |
|                                  | C   | 99.8      | 99.8 | 0.0  | 0.0  | 0.0  | 0.0  | 0.0   | 99.8 | 0.0  | 0.0  | 99.9 | 0.1  | 0.0  | 0.0  | 99.7 | 0.0  | 0.0  | 0.0  | 0.0  | 0.0  | 0.0  | 0.0 | 0.0  | 0.0  | 0.0  | 0.1  | 99.8 | 99.8 |
|                                  | G   | 0.1       | 0.1  | 0.2  | 99.9 | 99.9 | 0.2  | 99.6  | 0.0  | 0.2  | 99.9 | 0.0  | 0.0  | 94.9 | 0.2  | 0.0  | 90.8 | 91.0 | 89.9 | 95.2 | 0.0  | 0.3  | 0.0 | 0.0  | 0.0  | 0.0  | 0.0  | 0.0  | 0.0  |
|                                  | T   | 0.1       | 0.1  | 99.7 | 0.0  | 0.0  | 99.7 | 0.1   | 0.0  | 99.6 | 0.0  | 0.0  | 0.0  | 0.2  | 0.0  | 0.1  | 0.0  | 0.2  | 0.3  | 0.2  | 99.8 | 99.4 | 0.1 | 0.0  | 0.0  | 0.0  | 0.0  | 0.1  | 0.0  |
| -                                | 0.0 | 0.0       | 0.0  | 0.1  | 0.1  | 0.1  | 0.2  | 0.2   | 0.2  | 0.1  | 0.1  | 0.1  | 0.1  | 0.1  | 0.1  | 0.1  | 0.1  | 0.1  | 0.1  | 0.1  | 0.1  | 0.1  | 0.1 | 0.1  | 0.1  | 0.1  | 0.1  | 0.1  |      |
| evoA1-seBE: T2A +Rap Replicate 3 |     | C         | C    | T    | G    | G    | T    | G     | C    | T    | G    | C    | A    | G    | A    | C    | G    | G    | G    | G    | T    | T    | C   | C    | C    | C    | C    | C    | C    |
|                                  | A   | 0.0       | 0.0  | 0.0  | 0.0  | 0.0  | 0.0  | 0.2   | 0.0  | 0.0  | 0.1  | 0.0  | 99.8 | 4.1  | 99.6 | 0.0  | 7.4  | 7.3  | 7.9  | 3.5  | 0.0  | 0.1  | 0.0 | 0.0  | 0.0  | 0.0  | 0.1  | 0.0  | 0.0  |
|                                  | C   | 99.9      | 99.8 | 0.1  | 0.0  | 0.0  | 0.0  | 0.0   | 99.8 | 0.0  | 0.0  | 99.7 | 0.0  | 0.0  | 0.0  | 99.6 | 0.0  | 0.0  | 0.0  | 0.0  | 0.0  | 0.0  | 0.0 | 0.0  | 0.0  | 0.0  | 0.0  | 99.4 | 99.6 |
|                                  | G   | 0.1       | 0.0  | 0.1  | 99.9 | 99.9 | 0.1  | 99.6  | 0.0  | 0.2  | 99.8 | 0.0  | 0.0  | 95.5 | 0.1  | 0.0  | 92.3 | 92.3 | 91.6 | 96.0 | 0.0  | 0.3  | 0.1 | 0.0  | 0.0  | 0.0  | 0.0  | 0.0  | 0.0  |
|                                  | T   | 0.0       | 0.1  | 99.8 | 0.0  | 0.1  | 99.7 | 0.0   | 0.0  | 99.7 | 0.0  | 0.0  | 0.0  | 0.1  | 0.1  | 0.1  | 0.0  | 0.1  | 0.3  | 0.2  | 99.7 | 99.2 | 0.2 | 0.1  | 0.0  | 0.0  | 0.0  | 0.0  | 0.0  |
| -                                | 0.0 | 0.0       | 0.0  | 0.0  | 0.0  | 0.1  | 0.1  | 0.1   | 0.1  | 0.1  | 0.1  | 0.1  | 0.2  | 0.2  | 0.2  | 0.2  | 0.2  | 0.2  | 0.2  | 0.2  | 0.2  | 0.2  | 0.2 | 0.2  | 0.2  | 0.2  | 0.2  | 0.2  |      |
| evoA1-seBE: T2A +Rap Replicate 1 |     | C         | C    | T    | G    | G    | T    | G     | C    | T    | G    | C    | A    | G    | A    | C    | G    | G    | G    | G    | T    | T    | C   | C    | C    | C    | C    | C    | C    |
|                                  | A   | 0.0       | 0.0  | 0.0  | 0.0  | 0.0  | 0.0  | 0.0   | 0.0  | 0.0  | 0.0  | 0.0  | 99.9 | 3.1  | 99.9 | 0.0  | 4.4  | 4.8  | 5.0  | 2.8  | 0.0  | 0.0  | 0.0 | 0.0  | 0.0  | 0.0  | 0.0  | 0.0  | 0.0  |
|                                  | C   | 99.9      | 99.9 | 0.1  | 0.0  | 0.0  | 0.0  | 0.0   | 99.9 | 0.0  | 0.0  | 99.9 | 0.0  | 0.0  | 0.0  | 99.9 | 0.0  | 0.0  | 0.0  | 0.0  | 0.0  | 0.0  | 0.0 | 0.0  | 0.0  | 0.0  | 0.0  | 99.9 | 99.9 |
|                                  | G   | 0.0       | 0.0  | 0.1  | 99.9 | 99.8 | 0.0  | 99.9  | 0.0  | 0.0  | 99.9 | 0.0  | 0.0  | 96.8 | 0.0  | 0.0  | 95.4 | 95.0 | 94.8 | 97.0 | 0.0  | 0.0  | 0.0 | 0.0  | 0.0  | 0.0  | 0.0  | 0.0  | 0.0  |
|                                  | T   | 0.0       | 0.0  | 99.8 | 0.0  | 0.1  | 99.9 | 0.0   | 0.0  | 99.9 | 0.0  | 0.0  | 0.0  | 0.0  | 0.0  | 0.0  | 0.0  | 0.0  | 0.1  | 0.0  | 99.8 | 99.8 | 0.0 | 0.0  | 0.0  | 0.0  | 0.0  | 0.0  | 0.0  |
| -                                | 0.1 | 0.1       | 0.1  | 0.1  | 0.1  | 0.1  | 0.1  | 0.1   | 0.1  | 0.1  | 0.1  | 0.1  | 0.1  | 0.1  | 0.1  | 0.1  | 0.2  | 0.2  | 0.2  | 0.2  | 0.2  | 0.2  | 0.2 | 0.2  | 0.2  | 0.2  | 0.1  | 0.1  |      |
| evoA1-seBE: T2A +Rap Replicate 2 |     | C         | C    | T    | G    | G    | T    | G     | C    | T    | G    | C    | A    | G    | A    | C    | G    | G    | G    | G    | T    | T    | C   | C    | C    | C    | C    | C    | C    |
|                                  | A   | 0.0       | 0.0  | 0.0  | 0.0  | 0.0  | 0.0  | 0.1   | 0.0  | 0.0  | 0.1  | 0.0  | 99.9 | 1.6  | 99.7 | 0.0  | 2.6  | 2.8  | 2.9  | 1.2  | 0.0  | 0.0  | 0.0 | 0.0  | 0.0  | 0.0  | 0.1  | 0.0  | 0.0  |
|                                  | C   | 99.8      | 99.8 | 0.1  | 0.0  | 0.0  | 0.0  | 0.0   | 99.9 | 0.0  | 0.0  | 99.9 | 0.0  | 0.0  | 0.0  | 99.7 | 0.0  | 0.0  | 0.0  | 0.0  | 0.0  | 0.0  | 0.1 | 99.8 | 99.9 | 0.0  | 0.0  | 0.0  | 0.0  |
|                                  | G   | 0.1       | 0.1  | 0.1  | 99.9 | 99.9 | 0.2  | 99.9  | 0.0  | 0.2  | 99.8 | 0.0  | 0.0  | 98.1 | 0.1  | 0.1  | 97.3 | 96.9 | 96.7 | 98.5 | 0.0  | 0.3  | 0.1 | 0.0  | 0.0  | 0.0  | 0.0  | 0.0  | 0.0  |
|                                  | T   | 0.1       | 0.1  | 99.8 | 0.0  | 0.1  | 99.7 | 0.0   | 0.0  | 99.7 | 0.0  | 0.0  | 0.0  | 0.2  | 0.1  | 0.1  | 0.0  | 0.2  | 0.4  | 0.2  | 99.9 | 99.3 | 0.1 | 0.0  | 0.0  | 0.0  | 0.0  | 0.0  | 0.0  |
| -                                | 0.0 | 0.0       | 0.0  | 0.0  | 0.0  | 0.0  | 0.1  | 0.1   | 0.1  | 0.1  | 0.1  | 0.1  | 0.1  | 0.1  | 0.1  | 0.1  | 0.1  | 0.1  | 0.0  | 0.0  | 0.0  | 0.0  | 0.0 | 0.0  | 0.0  | 0.0  | 0.0  | 0.0  |      |
| evoA1-seBE: T2A +Rap Replicate 3 |     | C         | C    | T    | G    | G    | T    | G     | C    | T    | G    | C    | A    | G    | A    | C    | G    | G    | G    | G    | T    | T    | C   | C    | C    | C    | C    | C    | C    |
|                                  | A   | 0.0       | 0.0  | 0.0  | 0.0  | 0.0  | 0.0  | 0.0   | 0.0  | 0.0  | 0.0  | 0.0  | 99.8 | 2.9  | 99.6 | 0.0  | 4.9  | 4.8  | 4.9  | 2.8  | 0.0  | 0.1  | 0.0 | 0.0  | 0.0  | 0.0  | 0.0  | 0.0  | 0.0  |
|                                  | C   | 99.8      | 99.8 | 0.1  | 0.0  | 0.0  | 0.0  | 0.0   | 99.8 | 0.0  | 0.0  | 99.7 | 0.0  | 0.0  | 0.0  | 99.7 | 0.0  | 0.0  | 0.0  | 0.0  | 0.0  | 0.0  | 0.0 | 0.0  | 0.0  | 0.0  | 0.0  | 99.7 | 99.7 |
|                                  | G   | 0.1       | 0.1  | 0.1  | 99.9 | 99.9 | 0.3  | 99.8  | 0.0  | 0.3  | 99.8 | 0.0  | 0.0  | 96.8 | 0.1  | 0.0  | 94.8 | 94.9 | 94.4 | 96.8 | 0.1  | 0.3  | 0.0 | 0.0  | 0.0  | 0.0  | 0.0  | 0.0  | 0.0  |
|                                  | T   | 0.1       | 0.1  | 99.8 | 0.0  | 0.0  | 99.6 | 0.0   | 0.0  | 99.5 | 0.1  | 0.0  | 0.0  | 0.2  | 0.1  | 0.1  | 0.1  | 0.2  | 0.4  | 0.2  | 99.7 | 99.3 | 0.1 | 0.1  | 0.0  | 0.0  | 0.0  | 0.0  | 0.0  |
| -                                | 0.0 | 0.0       | 0.0  | 0.0  | 0.0  | 0.0  | 0.1  | 0.1   | 0.1  | 0.1  | 0.1  | 0.2  | 0.2  | 0.2  | 0.2  | 0.2  | 0.2  | 0.3  | 0.3  | 0.2  | 0.2  | 0.2  | 0.2 | 0.2  | 0.2  | 0.2  | 0.2  | 0.2  |      |
| evoA1-seBE: T2A +Rap Replicate 1 |     | C         | C    | T    | G    | G    | T    | G     | C    | T    | G    | C    | A    | G    | A    | C    | G    | G    | G    | G    | T    | T    | C   | C    | C    | C    | C    | C    | C    |
|                                  | A   | 0.0       | 0.0  | 0.0  | 0.0  | 0.0  | 0.0  | 0.0   | 0.0  | 0.0  | 0.0  | 0.0  | 99.9 | 0.1  | 99.9 | 0.0  | 0.1  |      |      |      |      |      |     |      |      |      |      |      |      |

Supplementary Figure 1

| m         |   | FANCF_OT2 |      |      |      |       |      |      |       |      |      |      |       |     |      |       |     |       |       |      |       |      |       |      |     |
|-----------|---|-----------|------|------|------|-------|------|------|-------|------|------|------|-------|-----|------|-------|-----|-------|-------|------|-------|------|-------|------|-----|
|           |   | E2        |      |      | S3   |       |      | L4   |       |      | L5   |      |       | Q6  |      |       | H7  |       |       | L8   |       |      |       |      |     |
|           |   | A         | C    | C    | A    | T     | C    | C    | C     | T    | C    | T    | G     | C   | A    | G     | C   | A     | C     | C    | A     | G    | G     |      |     |
| untreated | A | 99.9      | 0.2  | 0.2  | 99.4 | 0.0   | 0.4  | 0.1  | 0.0   | 0.0  | 0.1  | 0.1  | 0.1   | 0.0 | 0.0  | 99.8  | 0.0 | 0.0   | 100.0 | 0.0  | 0.0   | 99.9 | 0.0   | 0.1  |     |
|           | C | 0.0       | 99.7 | 99.8 | 0.6  | 0.0   | 99.6 | 99.8 | 100.0 | 0.0  | 99.9 | 99.9 | 0.1   | 0.0 | 99.9 | 0.1   | 0.0 | 100.0 | 0.0   | 99.9 | 100.0 | 0.0  | 0.0   | 0.0  |     |
|           | G | 0.1       | 0.0  | 0.0  | 0.0  | 0.0   | 0.0  | 0.0  | 0.0   | 0.0  | 0.0  | 0.1  | 100.0 | 0.0 | 0.1  | 100.0 | 0.0 | 0.0   | 0.0   | 0.0  | 0.0   | 0.1  | 100.0 | 99.9 |     |
|           | T | 0.0       | 0.0  | 0.0  | 0.0  | 100.0 | 0.1  | 0.0  | 0.0   | 99.9 | 0.0  | 0.0  | 99.7  | 0.0 | 0.1  | 0.0   | 0.0 | 0.0   | 0.0   | 0.0  | 0.0   | 0.0  | 0.0   | 0.0  | 0.0 |
|           | - | 0.0       | 0.0  | 0.0  | 0.0  | 0.0   | 0.0  | 0.0  | 0.0   | 0.0  | 0.0  | 0.0  | 0.0   | 0.0 | 0.0  | 0.0   | 0.0 | 0.0   | 0.0   | 0.0  | 0.0   | 0.0  | 0.0   | 0.0  | 0.0 |

  

|                           |   | 1    |      |      | 5    |      |      | 10   |      |      | 15   |      |       | 20  |       |       | PAM |       |     |      |       |     |       |       |     |
|---------------------------|---|------|------|------|------|------|------|------|------|------|------|------|-------|-----|-------|-------|-----|-------|-----|------|-------|-----|-------|-------|-----|
|                           |   | A    | C    | C    | A    | T    | C    | C    | C    | T    | C    | T    | G     | C   | A     | G     | C   | A     | C   | C    | A     | G   | G     |       |     |
| evoA1-seBE<br>Replicate 1 | A | 99.9 | 0.0  | 0.1  | 99.9 | 0.0  | 0.0  | 0.1  | 0.0  | 0.0  | 0.0  | 0.0  | 0.0   | 0.0 | 100.0 | 0.0   | 0.0 | 100.0 | 0.1 | 0.0  | 100.0 | 0.0 | 0.0   | 0.0   |     |
|                           | C | 0.0  | 99.7 | 97.7 | 0.0  | 0.0  | 97.3 | 97.2 | 97.3 | 0.0  | 97.6 | 98.0 | 0.0   | 0.0 | 99.9  | 0.0   | 0.0 | 99.9  | 0.0 | 99.9 | 100.0 | 0.0 | 0.0   | 0.0   |     |
|                           | G | 0.0  | 0.0  | 0.0  | 0.0  | 0.0  | 0.0  | 0.0  | 0.0  | 0.0  | 0.0  | 0.0  | 100.0 | 0.0 | 0.0   | 100.0 | 0.0 | 0.0   | 0.0 | 0.0  | 0.0   | 0.0 | 100.0 | 100.0 |     |
|                           | T | 0.0  | 0.1  | 2.2  | 0.0  | 99.9 | 2.6  | 2.6  | 2.6  | 99.9 | 2.3  | 1.8  | 99.9  | 0.0 | 0.1   | 0.0   | 0.0 | 0.0   | 0.0 | 0.0  | 0.0   | 0.0 | 0.0   | 0.0   | 0.0 |
|                           | - | 0.1  | 0.1  | 0.0  | 0.0  | 0.0  | 0.0  | 0.0  | 0.1  | 0.0  | 0.0  | 0.1  | 0.0   | 0.0 | 0.0   | 0.0   | 0.0 | 0.0   | 0.0 | 0.0  | 0.0   | 0.0 | 0.0   | 0.0   | 0.0 |

  

|                           |   | 1     |      |      | 5    |       |      | 10   |      |       | 15   |      |       | 20  |      |       | PAM |       |       |       |       |       |       |      |     |
|---------------------------|---|-------|------|------|------|-------|------|------|------|-------|------|------|-------|-----|------|-------|-----|-------|-------|-------|-------|-------|-------|------|-----|
|                           |   | A     | C    | C    | A    | T     | C    | C    | C    | T     | C    | T    | G     | C   | A    | G     | C   | A     | C     | C     | A     | G     | G     |      |     |
| evoA1-seBE<br>Replicate 2 | A | 100.0 | 0.4  | 0.3  | 99.3 | 0.0   | 0.4  | 0.2  | 0.1  | 0.0   | 0.2  | 0.1  | 0.0   | 0.0 | 0.1  | 99.8  | 0.0 | 0.0   | 100.0 | 0.0   | 0.0   | 100.0 | 0.0   | 0.0  | 0.0 |
|                           | C | 0.0   | 99.5 | 97.7 | 0.7  | 0.0   | 96.8 | 97.1 | 97.2 | 0.0   | 97.5 | 98.0 | 0.2   | 0.0 | 99.9 | 0.2   | 0.0 | 100.0 | 0.0   | 100.0 | 100.0 | 0.0   | 0.0   | 0.0  | 0.0 |
|                           | G | 0.0   | 0.0  | 0.0  | 0.0  | 0.0   | 0.0  | 0.0  | 0.0  | 0.0   | 0.0  | 0.0  | 100.0 | 0.0 | 0.0  | 100.0 | 0.0 | 0.0   | 0.0   | 0.0   | 0.0   | 0.0   | 100.0 | 99.9 | 0.0 |
|                           | T | 0.0   | 0.1  | 2.0  | 0.0  | 100.0 | 2.8  | 2.7  | 2.7  | 100.0 | 2.3  | 1.8  | 99.8  | 0.0 | 0.1  | 0.0   | 0.0 | 0.0   | 0.0   | 0.0   | 0.0   | 0.0   | 0.0   | 0.0  | 0.1 |
|                           | - | 0.0   | 0.0  | 0.0  | 0.0  | 0.0   | 0.0  | 0.0  | 0.0  | 0.0   | 0.0  | 0.1  | 0.0   | 0.0 | 0.0  | 0.0   | 0.0 | 0.0   | 0.0   | 0.0   | 0.0   | 0.0   | 0.0   | 0.0  | 0.0 |

  

|                           |   | 1    |      |      | 5    |      |      | 10   |      |      | 15   |      |      | 20   |      |      | PAM  |      |      |      |      |      |      |       |     |
|---------------------------|---|------|------|------|------|------|------|------|------|------|------|------|------|------|------|------|------|------|------|------|------|------|------|-------|-----|
|                           |   | A    | C    | C    | A    | T    | C    | C    | C    | T    | C    | T    | G    | C    | A    | G    | C    | A    | C    | C    | A    | G    | G    |       |     |
| evoA1-seBE<br>Replicate 3 | A | 99.8 | 0.2  | 0.1  | 99.1 | 0.0  | 0.3  | 0.1  | 0.1  | 0.0  | 0.2  | 0.1  | 0.1  | 0.0  | 0.0  | 99.8 | 0.0  | 0.0  | 99.9 | 0.0  | 0.0  | 99.9 | 0.0  | 0.0   | 0.0 |
|                           | C | 0.0  | 99.3 | 96.7 | 0.7  | 0.0  | 95.8 | 96.0 | 96.0 | 0.1  | 96.4 | 97.1 | 0.1  | 0.0  | 99.8 | 0.1  | 0.0  | 99.9 | 0.0  | 99.9 | 99.9 | 0.0  | 0.0  | 0.0   | 0.0 |
|                           | G | 0.0  | 0.0  | 0.0  | 0.0  | 0.0  | 0.0  | 0.0  | 0.0  | 0.0  | 0.1  | 0.0  | 0.0  | 99.9 | 0.0  | 0.0  | 99.9 | 0.0  | 0.1  | 0.0  | 0.0  | 0.0  | 99.9 | 100.0 | 0.0 |
|                           | T | 0.0  | 0.2  | 3.0  | 0.0  | 99.8 | 3.8  | 3.8  | 3.8  | 99.7 | 3.2  | 2.6  | 99.7 | 0.0  | 0.1  | 0.0  | 0.0  | 0.0  | 0.0  | 0.0  | 0.0  | 0.0  | 0.0  | 0.0   | 0.0 |
|                           | - | 0.2  | 0.2  | 0.2  | 0.2  | 0.2  | 0.1  | 0.1  | 0.2  | 0.1  | 0.1  | 0.2  | 0.1  | 0.1  | 0.1  | 0.1  | 0.1  | 0.1  | 0.1  | 0.1  | 0.0  | 0.0  | 0.0  | 0.0   | 0.0 |

  

|                                       |   | 1    |      |      | 5    |      |      | 10   |      |      | 15   |      |      | 20   |       |     | PAM  |       |     |      |      |     |       |      |     |
|---------------------------------------|---|------|------|------|------|------|------|------|------|------|------|------|------|------|-------|-----|------|-------|-----|------|------|-----|-------|------|-----|
|                                       |   | A    | C    | C    | A    | T    | C    | C    | C    | T    | C    | T    | G    | C    | A     | G   | C    | A     | C   | C    | A    | G   | G     |      |     |
| evoA1-seBE<br>T2A +Rap<br>Replicate 1 | A | 99.9 | 0.1  | 0.0  | 99.9 | 0.0  | 0.1  | 0.1  | 0.1  | 0.0  | 0.1  | 0.1  | 0.0  | 0.0  | 100.0 | 0.1 | 0.0  | 100.0 | 0.1 | 0.0  | 99.9 | 0.0 | 0.1   | 0.1  |     |
|                                       | C | 0.0  | 99.3 | 99.9 | 0.1  | 0.0  | 99.8 | 99.9 | 99.8 | 0.0  | 99.8 | 99.9 | 0.0  | 0.0  | 99.9  | 0.0 | 0.0  | 99.9  | 0.0 | 99.9 | 99.9 | 0.0 | 0.0   | 0.0  | 0.0 |
|                                       | G | 0.1  | 0.0  | 0.0  | 0.0  | 0.0  | 0.0  | 0.0  | 0.0  | 0.0  | 0.0  | 0.0  | 0.0  | 99.9 | 0.0   | 0.0 | 99.9 | 0.0   | 0.0 | 0.0  | 0.0  | 0.1 | 100.0 | 99.8 |     |
|                                       | T | 0.0  | 0.1  | 0.0  | 0.0  | 99.9 | 0.0  | 0.0  | 0.0  | 99.9 | 0.0  | 0.0  | 99.9 | 0.1  | 0.1   | 0.0 | 0.0  | 0.0   | 0.0 | 0.0  | 0.0  | 0.0 | 0.0   | 0.0  | 0.0 |
|                                       | - | 0.0  | 0.0  | 0.0  | 0.0  | 0.0  | 0.0  | 0.0  | 0.0  | 0.0  | 0.0  | 0.0  | 0.0  | 0.0  | 0.0   | 0.0 | 0.0  | 0.0   | 0.0 | 0.0  | 0.0  | 0.0 | 0.0   | 0.0  | 0.0 |

  

|                                       |   | 1    |      |      | 5    |      |      | 10   |      |      | 15   |      |      | 20   |      |      | PAM   |      |      |       |       |       |       |       |     |
|---------------------------------------|---|------|------|------|------|------|------|------|------|------|------|------|------|------|------|------|-------|------|------|-------|-------|-------|-------|-------|-----|
|                                       |   | A    | C    | C    | A    | T    | C    | C    | C    | T    | C    | T    | G    | C    | A    | G    | C     | A    | C    | C     | A     | G     | G     |       |     |
| evoA1-seBE<br>T2A +Rap<br>Replicate 2 | A | 99.9 | 0.4  | 0.2  | 99.0 | 0.0  | 0.6  | 0.2  | 0.1  | 0.0  | 0.3  | 0.1  | 0.1  | 0.0  | 0.0  | 99.8 | 0.0   | 0.0  | 99.9 | 0.0   | 0.0   | 100.0 | 0.0   | 0.0   | 0.0 |
|                                       | C | 0.0  | 99.5 | 99.2 | 0.9  | 0.0  | 98.6 | 99.0 | 99.2 | 0.0  | 99.1 | 99.4 | 0.2  | 0.0  | 99.9 | 0.1  | 0.0   | 99.9 | 0.0  | 100.0 | 100.0 | 0.0   | 0.0   | 0.0   | 0.0 |
|                                       | G | 0.0  | 0.0  | 0.0  | 0.0  | 0.0  | 0.0  | 0.0  | 0.0  | 0.0  | 0.0  | 0.0  | 0.0  | 99.9 | 0.0  | 0.0  | 100.0 | 0.0  | 0.0  | 0.0   | 0.0   | 0.0   | 100.0 | 100.0 |     |
|                                       | T | 0.0  | 0.1  | 0.5  | 0.0  | 99.9 | 0.8  | 0.7  | 0.7  | 99.9 | 0.6  | 0.4  | 99.6 | 0.0  | 0.0  | 0.0  | 0.0   | 0.0  | 0.0  | 0.0   | 0.0   | 0.0   | 0.0   | 0.0   | 0.0 |
|                                       | - | 0.1  | 0.1  | 0.1  | 0.1  | 0.1  | 0.1  | 0.1  | 0.1  | 0.1  | 0.1  | 0.0  | 0.0  | 0.0  | 0.0  | 0.0  | 0.0   | 0.0  | 0.0  | 0.0   | 0.0   | 0.0   | 0.0   | 0.0   | 0.0 |

  

|                                       |   | 1    |      |      | 5    |       |      | 10   |      |       | 15   |      |      | 20    |      |      | PAM   |       |       |      |       |       |       |       |     |
|---------------------------------------|---|------|------|------|------|-------|------|------|------|-------|------|------|------|-------|------|------|-------|-------|-------|------|-------|-------|-------|-------|-----|
|                                       |   | A    | C    | C    | A    | T     | C    | C    | C    | T     | C    | T    | G    | C     | A    | G    | C     | A     | C     | C    | A     | G     | G     |       |     |
| evoA1-seBE<br>T2A +Rap<br>Replicate 3 | A | 99.9 | 0.3  | 0.2  | 99.4 | 0.0   | 0.4  | 0.1  | 0.1  | 0.0   | 0.2  | 0.1  | 0.1  | 0.0   | 0.0  | 99.8 | 0.0   | 0.0   | 100.0 | 0.0  | 0.0   | 100.0 | 0.0   | 0.0   | 0.0 |
|                                       | C | 0.1  | 99.6 | 98.8 | 0.6  | 0.0   | 98.1 | 98.3 | 98.4 | 0.0   | 98.7 | 99.1 | 0.2  | 0.0   | 99.9 | 0.1  | 0.0   | 100.0 | 0.0   | 99.9 | 100.0 | 0.0   | 0.0   | 0.0   | 0.0 |
|                                       | G | 0.0  | 0.0  | 0.0  | 0.0  | 0.0   | 0.0  | 0.0  | 0.0  | 0.0   | 0.0  | 0.0  | 0.0  | 100.0 | 0.0  | 0.0  | 100.0 | 0.0   | 0.0   | 0.0  | 0.0   | 0.0   | 100.0 | 100.0 |     |
|                                       | T | 0.0  | 0.1  | 1.1  | 0.0  | 100.0 | 1.5  | 1.5  | 1.5  | 100.0 | 1.1  | 0.9  | 99.7 | 0.0   | 0.1  | 0.0  | 0.0   | 0.0   | 0.0   | 0.0  | 0.0   | 0.0   | 0.0   | 0.0   | 0.0 |
|                                       | - | 0.0  | 0.0  | 0.0  | 0.0  | 0.0   | 0.0  | 0.0  | 0.0  | 0.0   | 0.0  | 0.0  | 0.0  | 0.0   | 0.0  | 0.0  | 0.0   | 0.0   | 0.0   | 0.0  | 0.0   | 0.0   | 0.0   | 0.0   | 0.0 |

  

|                                       |   | 1    |      |      | 5    |      |      | 10   |      |      | 15   |      |      | 20   |      |       | PAM  |      |       |      |       |      |       |      |     |
|---------------------------------------|---|------|------|------|------|------|------|------|------|------|------|------|------|------|------|-------|------|------|-------|------|-------|------|-------|------|-----|
|                                       |   | A    | C    | C    | A    | T    | C    | C    | C    | T    | C    | T    | G    | C    | A    | G     | C    | A    | C     | C    | A     | G    | G     |      |     |
| evoA1-seBE<br>T2A +Rap<br>Replicate 1 | A | 99.9 | 0.1  | 0.0  | 99.9 | 0.0  | 0.1  | 0.0  | 0.0  | 0.0  | 0.2  | 0.1  | 0.0  | 0.1  | 0.0  | 100.0 | 0.1  | 0.1  | 100.0 | 0.1  | 0.0   | 99.8 | 0.0   | 0.1  |     |
|                                       | C | 0.0  | 99.8 | 99.9 | 0.1  | 0.0  | 99.9 | 99.9 | 99.9 | 0.0  | 99.8 | 99.9 | 0.0  | 0.0  | 99.9 | 0.0   | 0.0  | 99.9 | 0.0   | 99.9 | 100.0 | 0.0  | 0.0   | 0.0  | 0.0 |
|                                       | G | 0.0  | 0.0  | 0.0  | 0.0  | 0.0  | 0.0  | 0.0  | 0.0  | 0.0  | 0.0  | 0.0  | 0.0  | 99.9 | 0.0  | 0.0   | 99.8 | 0.0  | 0.0   | 0.0  | 0.0   | 0.1  | 100.0 | 99.8 |     |
|                                       | T | 0.0  | 0.1  | 0.0  | 0.0  | 99.9 | 0.0  | 0.0  | 0.0  | 99.9 | 0.0  | 0.0  | 99.9 | 0.0  | 0.1  | 0.0   | 0.1  | 0.0  | 0.0   | 0.0  | 0.0   | 0.0  | 0.0   | 0.0  | 0.1 |
|                                       | - | 0.0  | 0.0  | 0.0  | 0.0  | 0.0  | 0.0  | 0.0  | 0.0  | 0.0  | 0.0  | 0.0  | 0.0  | 0.0  | 0.0  | 0.0   | 0.0  | 0.0  | 0.0   | 0.0  | 0.0   | 0.0  | 0.0   | 0.0  | 0.0 |

  

|                                       |   | 1    |      |      | 5    |       |      | 10   |      |      | 15   |      |      | 20    |      |      | PAM   |       |       |       |       |       |       |       |     |
|---------------------------------------|---|------|------|------|------|-------|------|------|------|------|------|------|------|-------|------|------|-------|-------|-------|-------|-------|-------|-------|-------|-----|
|                                       |   | A    | C    | C    | A    | T     | C    | C    | C    | T    | C    | T    | G    | C     | A    | G    | C     | A     | C     | C     | A     | G     | G     |       |     |
| evoA1-seBE<br>T2A +Rap<br>Replicate 2 | A | 99.9 | 0.6  | 0.1  | 99.1 | 0.0   | 0.6  | 0.3  | 0.2  | 0.0  | 0.2  | 0.1  | 0.1  | 0.0   | 0.0  | 99.7 | 0.0   | 0.0   | 100.0 | 0.0   | 0.0   | 100.0 | 0.0   | 0.0   | 0.0 |
|                                       | C | 0.0  | 99.3 | 99.8 | 0.7  | 0.0   | 99.3 | 99.7 | 99.8 | 0.0  | 99.8 | 99.9 | 0.2  | 0.0   | 99.9 | 0.3  | 0.0   | 100.0 | 0.0   | 100.0 | 100.0 | 0.0   | 0.0   | 0.0   | 0.0 |
|                                       | G | 0.0  | 0.0  | 0.0  | 0.1  | 0.0   | 0.0  | 0.0  | 0.0  | 0.0  | 0.0  | 0.0  | 0.0  | 100.0 | 0.0  | 0.0  | 100.0 | 0.0   | 0.0   | 0.0   | 0.0   | 0.0   | 100.0 | 100.0 |     |
|                                       | T | 0.0  | 0.0  | 0.0  | 0.0  | 100.0 | 0.1  | 0.0  | 0.0  | 99.9 | 0.0  | 0.0  | 99.7 | 0.0   | 0.1  | 0.0  | 0.0   | 0.0   | 0.0   | 0.0   | 0.0   | 0.0   | 0.0   | 0.0   | 0.0 |
|                                       | - | 0.0  | 0.0  | 0.0  | 0.0  | 0.0   | 0.0  | 0.0  | 0.0  | 0.0  | 0.0  | 0.0  | 0.0  | 0.0   | 0.0  | 0.0  | 0.0   | 0.0   | 0.0   | 0.0   | 0.0   | 0.0   | 0.0   | 0.0   | 0.0 |

  

|                                       |   | 1    |      |      | 5    |     |      | 10   |      |     | 15  |     |     | 20  |     |      | PAM |     |      |     |     |       |     |     |     |
|---------------------------------------|---|------|------|------|------|-----|------|------|------|-----|-----|-----|-----|-----|-----|------|-----|-----|------|-----|-----|-------|-----|-----|-----|
|                                       |   | A    | C    | C    | A    | T   | C    | C    | C    | T   | C   | T   | G   | C   | A   | G    | C   | A   | C    | C   | A   | G     | G   |     |     |
| evoA1-seBE<br>T2A +Rap<br>Replicate 3 | A | 99.9 | 0.4  | 0.1  | 99.3 | 0.0 | 0.4  | 0.1  | 0.1  | 0.0 | 0.1 | 0.2 | 0.2 | 0.0 | 0.0 | 99.9 | 0.0 | 0.0 | 99.9 | 0.0 | 0.0 | 100.0 | 0.0 | 0.0 | 0.0 |
|                                       | C | 0.1  | 99.6 | 99.9 | 0.7  | 0.0 | 99.5 | 99.8 | 99.9 |     |     |     |     |     |     |      |     |     |      |     |     |       |     |     |     |

**Supplementary Figure 2. Base editing efficiency of evoA1-seBE-IRES constructs in human cells at diverse loci and off-target sites.** The frequency of individual base calls at each locus of interest are shown, colored using a heat map from white (0%) to red (100%). The parent sequence is shown with PAM (yellow) and sgRNA protospacer (black) noted. When the PAM is at right, the coding strand cytosine (C) targeted for mutation is highlighted in red. When the PAM is at left, the non-coding strand cytosine is targeted, and the associated coding strand (G) is highlighted in red. The data in Fig. 3c show the quantification of conversion at the target base only, with individual loci shown in Extended Data Fig. 5b. Results across each locus with individual replicates are shown using untreated cells (n = 1), along with intact evoA1-BE or evoA1-seBE-IRES with or without rapamycin (n = 3 each). The loci analyzed and desired mutations are (a) CDA E67R targeting the active site residue, (b) CDA Q104\* nonsense mutation, (c) IDH2 R172K neomorphic mutation, (d) validated EMX1 targeting site, (e) validated EMX1 OT1 (f) validated EMX1 OT2.



# Supplementary Figure 2

**a** *CDA E67R*

|           | P61 |             |              | L62         |             |              | G63 |              |             | I64         |             |     | C65          |              |              | A66 |             |     | E67         |              |     |     |
|-----------|-----|-------------|--------------|-------------|-------------|--------------|-----|--------------|-------------|-------------|-------------|-----|--------------|--------------|--------------|-----|-------------|-----|-------------|--------------|-----|-----|
|           | C   | C           | C            | G           | C           | T            | G   | G            | C           | A           | T           | C   | T            | G            | T            | G   | C           | T   | G           | A            | A   | C   |
| untreated | A   | 0.0         | 0.0          | 0.0         | 0.1         | 0.0          | 0.0 | 0.0          | 0.1         | 0.0         | <b>99.9</b> | 0.0 | 0.0          | 0.0          | 0.0          | 0.1 | 0.0         | 0.0 | 0.1         | 0.0          | 0.0 | 0.0 |
|           | C   | <b>99.9</b> | <b>100.0</b> | <b>99.9</b> | 0.0         | <b>100.0</b> | 0.0 | 0.0          | 0.0         | 0.0         | <b>99.9</b> | 0.0 | 0.0          | <b>100.0</b> | 0.0          | 0.0 | 0.0         | 0.0 | <b>99.9</b> | 0.0          | 0.0 | 0.0 |
|           | G   | 0.0         | 0.0          | 0.0         | <b>99.9</b> | 0.0          | 0.0 | <b>100.0</b> | <b>99.9</b> | <b>99.9</b> | 0.0         | 0.0 | 0.0          | 0.0          | <b>100.0</b> | 0.0 | <b>99.9</b> | 0.0 | 0.0         | <b>99.9</b>  | 0.0 | 0.0 |
|           | T   | 0.0         | 0.0          | 0.0         | 0.0         | <b>99.9</b>  | 0.0 | 0.0          | 0.0         | 0.0         | 0.0         | 0.0 | <b>100.0</b> | 0.0          | <b>100.0</b> | 0.0 | <b>99.9</b> | 0.0 | 0.1         | <b>100.0</b> | 0.0 | 0.0 |
|           | -   | 0.0         | 0.0          | 0.0         | 0.0         | 0.0          | 0.0 | 0.0          | 0.0         | 0.0         | 0.0         | 0.0 | 0.0          | 0.0          | 0.0          | 0.0 | 0.0         | 0.0 | 0.0         | 0.0          | 0.0 | 0.0 |

  

| evoA1-seBE<br>Replicate 1 | PAM         |             |             | 20          |             |             | 15          |             |             | 10          |             |     | 5           |             |             | 1           |             |             |             |             |             |             |
|---------------------------|-------------|-------------|-------------|-------------|-------------|-------------|-------------|-------------|-------------|-------------|-------------|-----|-------------|-------------|-------------|-------------|-------------|-------------|-------------|-------------|-------------|-------------|
|                           | C           | C           | C           | G           | C           | T           | G           | G           | C           | A           | T           | C   | T           | G           | T           | G           | C           | T           | G           | A           | A           | C           |
| A                         | 0.0         | 0.0         | 0.0         | 0.1         | 0.0         | 0.0         | 0.9         | 4.4         | 0.8         | 0.0         | <b>99.2</b> | 0.0 | 0.0         | 0.0         | 2.7         | 0.1         | <b>53.9</b> | 0.0         | 0.0         | <b>53.8</b> | <b>99.6</b> | <b>99.8</b> |
| C                         | <b>99.9</b> | <b>99.9</b> | <b>99.9</b> | 0.0         | <b>99.9</b> | 0.0         | 0.0         | 0.0         | 0.0         | <b>99.3</b> | 0.0         | 0.0 | <b>99.2</b> | 0.0         | 0.0         | 0.1         | 0.3         | <b>99.3</b> | 0.0         | 0.2         | 0.0         | 0.0         |
| G                         | 0.0         | 0.0         | 0.0         | <b>99.8</b> | 0.0         | 0.0         | <b>98.5</b> | <b>94.9</b> | <b>98.6</b> | 0.0         | 0.0         | 0.0 | 0.0         | <b>96.4</b> | 0.0         | <b>44.6</b> | 0.0         | 0.0         | <b>45.0</b> | 0.0         | 0.0         | 0.0         |
| T                         | 0.0         | 0.0         | 0.0         | 0.0         | 0.0         | <b>99.8</b> | 0.0         | 0.2         | 0.0         | 0.0         | <b>99.2</b> | 0.1 | <b>99.3</b> | 0.0         | <b>99.1</b> | 0.5         | 0.0         | <b>99.4</b> | 0.6         | 0.0         | 0.0         | 0.0         |
| -                         | 0.1         | 0.1         | 0.1         | 0.1         | 0.1         | 0.2         | 0.5         | 0.5         | 0.6         | 0.6         | 0.7         | 0.7 | 0.7         | 0.7         | 0.7         | 0.7         | 0.6         | 0.5         | 0.5         | 0.3         | 0.2         | 0.2         |

  

| evoA1-seBE<br>Replicate 2 | PAM         |             |             | 20          |             |             | 15          |             |             | 10          |             |             | 5           |             |     | 1           |             |     |             |             |             |             |
|---------------------------|-------------|-------------|-------------|-------------|-------------|-------------|-------------|-------------|-------------|-------------|-------------|-------------|-------------|-------------|-----|-------------|-------------|-----|-------------|-------------|-------------|-------------|
|                           | C           | C           | C           | G           | C           | T           | G           | G           | C           | A           | T           | C           | T           | G           | T   | G           | C           | T   | G           | A           | A           | C           |
| A                         | 0.0         | 0.0         | 0.0         | 0.0         | 0.0         | 0.0         | 0.9         | 4.2         | 0.7         | 0.0         | <b>99.2</b> | 0.1         | 0.0         | 0.0         | 2.6 | 0.0         | <b>53.2</b> | 0.0 | 0.0         | <b>53.2</b> | <b>99.6</b> | <b>99.7</b> |
| C                         | <b>99.9</b> | <b>99.8</b> | <b>99.9</b> | 0.0         | <b>99.8</b> | 0.0         | 0.0         | 0.1         | 0.1         | <b>99.5</b> | 0.0         | 0.0         | <b>99.2</b> | 0.0         | 0.1 | 0.2         | <b>99.1</b> | 0.0 | 0.2         | 0.0         | 0.0         | 0.0         |
| G                         | 0.0         | 0.0         | 0.0         | <b>99.9</b> | 0.0         | 0.0         | <b>98.5</b> | <b>95.2</b> | <b>98.8</b> | 0.0         | 0.0         | 0.0         | 0.0         | <b>96.5</b> | 0.0 | <b>45.3</b> | 0.0         | 0.0 | <b>45.8</b> | 0.0         | 0.0         | 0.0         |
| T                         | 0.0         | 0.1         | 0.0         | 0.0         | 0.0         | <b>99.8</b> | 0.1         | 0.1         | 0.0         | 0.0         | 0.1         | <b>99.2</b> | 0.1         | <b>99.2</b> | 0.1 | <b>99.1</b> | 0.4         | 0.0 | <b>99.3</b> | 0.1         | 0.0         | 0.0         |
| -                         | 0.1         | 0.1         | 0.1         | 0.1         | 0.2         | 0.5         | 0.5         | 0.5         | 0.5         | 0.5         | 0.7         | 0.7         | 0.7         | 0.8         | 0.8 | 0.9         | 0.8         | 0.7 | 0.7         | 0.3         | 0.3         | 0.3         |

  

| evoA1-seBE<br>Replicate 3 | PAM         |             |             | 20          |             |             | 15          |             |             | 10          |             |             | 5           |             |     | 1           |             |             |             |             |             |             |
|---------------------------|-------------|-------------|-------------|-------------|-------------|-------------|-------------|-------------|-------------|-------------|-------------|-------------|-------------|-------------|-----|-------------|-------------|-------------|-------------|-------------|-------------|-------------|
|                           | C           | C           | C           | G           | C           | T           | G           | G           | C           | A           | T           | C           | T           | G           | T   | G           | C           | T           | G           | A           | A           | C           |
| A                         | 0.0         | 0.0         | 0.0         | 0.0         | 0.0         | 0.0         | 0.9         | 4.1         | 0.5         | 0.0         | <b>99.2</b> | 0.0         | 0.0         | 0.0         | 3.0 | 0.0         | <b>54.7</b> | 0.0         | 0.0         | <b>54.2</b> | <b>99.4</b> | <b>99.5</b> |
| C                         | <b>99.9</b> | <b>99.8</b> | <b>99.8</b> | 0.0         | <b>99.8</b> | 0.0         | 0.0         | 0.1         | 0.1         | <b>99.3</b> | 0.0         | 0.0         | <b>99.1</b> | 0.0         | 0.1 | 0.0         | 0.2         | <b>99.0</b> | 0.1         | 0.1         | 0.0         | 0.0         |
| G                         | 0.0         | 0.0         | 0.0         | <b>99.8</b> | 0.0         | 0.0         | <b>98.5</b> | <b>95.0</b> | <b>98.7</b> | 0.0         | 0.0         | 0.0         | 0.0         | <b>95.9</b> | 0.0 | <b>43.7</b> | 0.0         | 0.0         | <b>44.3</b> | 0.0         | 0.0         | 0.0         |
| T                         | 0.0         | 0.0         | 0.0         | 0.0         | 0.0         | <b>99.8</b> | 0.1         | 0.3         | 0.0         | 0.0         | 0.0         | <b>99.1</b> | 0.0         | <b>99.0</b> | 0.0 | <b>99.0</b> | 0.4         | 0.0         | <b>99.1</b> | 0.4         | 0.0         | 0.1         |
| -                         | 0.1         | 0.1         | 0.1         | 0.1         | 0.1         | 0.2         | 0.5         | 0.5         | 0.6         | 0.7         | 0.7         | 0.9         | 0.9         | 1.0         | 0.9 | 1.0         | 1.1         | 0.9         | 0.9         | 0.6         | 0.5         | 0.4         |

  

| evoA1-seBE<br>IRES +Rap Rep 1 | PAM         |             |             | 20          |             |             | 15          |             |             | 10          |             |             | 5           |             |     | 1           |             |     |             |              |             |     |
|-------------------------------|-------------|-------------|-------------|-------------|-------------|-------------|-------------|-------------|-------------|-------------|-------------|-------------|-------------|-------------|-----|-------------|-------------|-----|-------------|--------------|-------------|-----|
|                               | C           | C           | C           | G           | C           | T           | G           | G           | C           | A           | T           | C           | T           | G           | T   | G           | C           | T   | G           | A            | A           | C   |
| A                             | 0.0         | 0.0         | 0.0         | 0.0         | 0.0         | 0.0         | 0.4         | 2.7         | 0.4         | 0.0         | <b>99.9</b> | 0.0         | 0.0         | 0.9         | 0.0 | <b>34.3</b> | 0.0         | 0.0 | <b>34.8</b> | <b>100.0</b> | <b>99.9</b> |     |
| C                             | <b>99.9</b> | <b>99.9</b> | <b>99.9</b> | 0.0         | <b>99.9</b> | 0.0         | 0.0         | 0.0         | 0.0         | <b>99.9</b> | 0.0         | 0.0         | <b>99.9</b> | 0.0         | 0.1 | 0.1         | <b>99.9</b> | 0.0 | 0.0         | 0.0          | 0.0         | 0.0 |
| G                             | 0.0         | 0.0         | 0.0         | <b>99.9</b> | 0.0         | 0.0         | <b>99.4</b> | <b>97.1</b> | <b>99.5</b> | 0.0         | 0.0         | 0.0         | 0.0         | <b>98.9</b> | 0.0 | <b>65.3</b> | 0.0         | 0.0 | <b>65.0</b> | 0.0          | 0.0         | 0.0 |
| T                             | 0.0         | 0.0         | 0.0         | 0.0         | 0.0         | <b>99.9</b> | 0.0         | 0.0         | 0.0         | 0.0         | 0.0         | <b>99.9</b> | 0.0         | <b>99.9</b> | 0.0 | <b>99.8</b> | 0.2         | 0.0 | <b>99.9</b> | 0.0          | 0.0         | 0.0 |
| -                             | 0.1         | 0.1         | 0.1         | 0.1         | 0.1         | 0.1         | 0.1         | 0.1         | 0.1         | 0.1         | 0.1         | 0.1         | 0.1         | 0.1         | 0.1 | 0.1         | 0.1         | 0.1 | 0.1         | 0.1          | 0.0         | 0.0 |

  

| evoA1-seBE<br>IRES +Rap Rep 2 | PAM          |              |             | 20          |              |              | 15          |             |             | 10          |             |             | 5           |             |     | 1           |             |     |             |             |             |     |
|-------------------------------|--------------|--------------|-------------|-------------|--------------|--------------|-------------|-------------|-------------|-------------|-------------|-------------|-------------|-------------|-----|-------------|-------------|-----|-------------|-------------|-------------|-----|
|                               | C            | C            | C           | G           | C            | T            | G           | G           | C           | A           | T           | C           | T           | G           | T   | G           | C           | T   | G           | A           | A           | C   |
| A                             | 0.0          | 0.0          | 0.0         | 0.0         | 0.0          | 0.0          | 0.6         | 2.2         | 0.5         | 0.0         | <b>99.8</b> | 0.0         | 0.0         | 1.2         | 0.0 | <b>34.1</b> | 0.0         | 0.0 | <b>35.3</b> | <b>99.9</b> | <b>99.9</b> |     |
| C                             | <b>100.0</b> | <b>100.0</b> | <b>99.9</b> | 0.0         | <b>100.0</b> | 0.0          | 0.0         | 0.0         | 0.0         | <b>99.8</b> | 0.0         | 0.0         | <b>99.8</b> | 0.0         | 0.1 | 0.1         | <b>99.8</b> | 0.0 | 0.1         | 0.0         | 0.0         | 0.0 |
| G                             | 0.0          | 0.0          | 0.0         | <b>99.9</b> | 0.0          | 0.0          | <b>99.3</b> | <b>97.6</b> | <b>99.3</b> | 0.0         | 0.0         | 0.0         | 0.0         | <b>98.6</b> | 0.0 | <b>65.6</b> | 0.0         | 0.0 | <b>64.5</b> | 0.0         | 0.0         | 0.0 |
| T                             | 0.0          | 0.0          | 0.0         | 0.0         | 0.0          | <b>100.0</b> | 0.0         | 0.0         | 0.0         | 0.0         | 0.0         | <b>99.8</b> | 0.0         | <b>99.8</b> | 0.0 | <b>99.7</b> | 0.1         | 0.0 | <b>99.8</b> | 0.0         | 0.0         | 0.0 |
| -                             | 0.0          | 0.0          | 0.0         | 0.0         | 0.0          | 0.0          | 0.2         | 0.2         | 0.2         | 0.2         | 0.2         | 0.2         | 0.2         | 0.2         | 0.1 | 0.2         | 0.2         | 0.2 | 0.2         | 0.2         | 0.1         | 0.1 |

  

| evoA1-seBE<br>IRES +Rap Rep 3 | PAM         |             |             | 20          |              |             | 15          |             |             | 10          |             |             | 5           |             |     | 1           |             |     |             |              |              |     |
|-------------------------------|-------------|-------------|-------------|-------------|--------------|-------------|-------------|-------------|-------------|-------------|-------------|-------------|-------------|-------------|-----|-------------|-------------|-----|-------------|--------------|--------------|-----|
|                               | C           | C           | C           | G           | C            | T           | G           | G           | C           | A           | T           | C           | T           | G           | T   | G           | C           | T   | G           | A            | A            | C   |
| A                             | 0.0         | 0.0         | 0.0         | 0.0         | 0.0          | 0.0         | 0.5         | 2.2         | 0.5         | 0.0         | <b>99.8</b> | 0.0         | 0.0         | 1.1         | 0.0 | <b>35.0</b> | 0.0         | 0.0 | <b>35.9</b> | <b>100.0</b> | <b>100.0</b> |     |
| C                             | <b>99.9</b> | <b>99.9</b> | <b>99.9</b> | 0.0         | <b>100.0</b> | 0.0         | 0.0         | 0.0         | 0.0         | <b>99.9</b> | 0.0         | 0.0         | <b>99.9</b> | 0.0         | 0.0 | 0.0         | <b>99.8</b> | 0.0 | 0.0         | 0.0          | 0.0          | 0.0 |
| G                             | 0.0         | 0.0         | 0.0         | <b>99.9</b> | 0.0          | 0.0         | <b>99.4</b> | <b>97.7</b> | <b>99.4</b> | 0.0         | 0.0         | 0.0         | 0.0         | <b>98.8</b> | 0.0 | <b>64.8</b> | 0.0         | 0.0 | <b>64.0</b> | 0.0          | 0.0          | 0.0 |
| T                             | 0.0         | 0.1         | 0.0         | 0.0         | 0.0          | <b>99.9</b> | 0.0         | 0.0         | 0.0         | 0.0         | 0.0         | <b>99.9</b> | 0.0         | <b>99.9</b> | 0.0 | <b>99.8</b> | 0.0         | 0.0 | <b>99.9</b> | 0.0          | 0.0          | 0.0 |
| -                             | 0.0         | 0.0         | 0.0         | 0.0         | 0.0          | 0.0         | 0.1         | 0.1         | 0.1         | 0.1         | 0.1         | 0.1         | 0.1         | 0.1         | 0.1 | 0.1         | 0.1         | 0.1 | 0.1         | 0.1          | 0.0          | 0.0 |

  

| evoA1-seBE<br>IRES -Rap Rep 1 | PAM          |             |              | 20          |              |              | 15           |             |              | 10           |              |              | 5            |              |     | 1           |              |     |              |              |              |     |
|-------------------------------|--------------|-------------|--------------|-------------|--------------|--------------|--------------|-------------|--------------|--------------|--------------|--------------|--------------|--------------|-----|-------------|--------------|-----|--------------|--------------|--------------|-----|
|                               | C            | C           | C            | G           | C            | T            | G            | G           | C            | A            | T            | C            | T            | G            | T   | G           | C            | T   | G            | A            | A            | C   |
| A                             | 0.0          | 0.0         | 0.0          | 0.1         | 0.0          | 0.0          | 0.0          | 0.0         | 0.0          | 0.0          | <b>100.0</b> | 0.0          | 0.0          | 0.0          | 0.0 | 1.4         | 0.0          | 0.0 | 2.1          | <b>100.0</b> | <b>100.0</b> |     |
| C                             | <b>100.0</b> | <b>99.9</b> | <b>100.0</b> | 0.0         | <b>100.0</b> | 0.0          | 0.0          | 0.0         | 0.0          | <b>100.0</b> | 0.0          | 0.0          | <b>100.0</b> | 0.0          | 0.0 | 0.0         | <b>100.0</b> | 0.0 | 0.0          | 0.0          | 0.0          | 0.0 |
| G                             | 0.0          | 0.0         | 0.0          | <b>99.9</b> | 0.0          | 0.0          | <b>100.0</b> | <b>99.9</b> | <b>100.0</b> | 0.0          | 0.0          | 0.0          | 0.0          | <b>100.0</b> | 0.0 | <b>98.5</b> | 0.0          | 0.0 | <b>97.9</b>  | 0.0          | 0.0          | 0.0 |
| T                             | 0.0          | 0.0         | 0.0          | 0.0         | 0.0          | <b>100.0</b> | 0.0          | 0.0         | 0.0          | 0.0          | 0.0          | <b>100.0</b> | 0.0          | <b>100.0</b> | 0.0 | <b>99.9</b> | 0.0          | 0.0 | <b>100.0</b> | 0.0          | 0.0          | 0.0 |
| -                             | 0.0          | 0.0         | 0.0          | 0.0         | 0.0          | 0.0          | 0.0          | 0.0         | 0.0          | 0.0          | 0.0          | 0.0          | 0.0          | 0.0          | 0.0 | 0.0         | 0.0          | 0.0 | 0.0          | 0.0          | 0.0          | 0.0 |

  

| evoA1-seBE<br>IRES -Rap Rep 2 | PAM          |              |              | 20          |              |              | 15           |             |              | 10           |              |              | 5            |              |     | 1           |              |     |              |              |              |     |
|-------------------------------|--------------|--------------|--------------|-------------|--------------|--------------|--------------|-------------|--------------|--------------|--------------|--------------|--------------|--------------|-----|-------------|--------------|-----|--------------|--------------|--------------|-----|
|                               | C            | C            | C            | G           | C            | T            | G            | G           | C            | A            | T            | C            | T            | G            | T   | G           | C            | T   | G            | A            | A            | C   |
| A                             | 0.0          | 0.0          | 0.0          | 0.0         | 0.0          | 0.0          | 0.0          | 0.0         | 0.0          | 0.0          | <b>100.0</b> | 0.0          | 0.0          | 0.0          | 0.0 | 1.0         | 0.0          | 0.0 | 1.2          | <b>100.0</b> | <b>100.0</b> |     |
| C                             | <b>100.0</b> | <b>100.0</b> | <b>100.0</b> | 0.0         | <b>100.0</b> | 0.0          | 0.0          | 0.0         | 0.0          | <b>100.0</b> | 0.0          | 0.0          | <b>100.0</b> | 0.0          | 0.0 | 0.0         | <b>100.0</b> | 0.0 | 0.0          | 0.0          | 0.0          | 0.0 |
| G                             | 0.0          | 0.0          | 0.0          | <b>99.9</b> | 0.0          | 0.0          | <b>100.0</b> | <b>99.9</b> | <b>100.0</b> | 0.0          | 0.0          | 0.0          | 0.0          | <b>99.9</b>  | 0.0 | <b>99.0</b> | 0.0          | 0.0 | <b>98.7</b>  | 0.0          | 0.0          | 0.0 |
| T                             | 0.0          | 0.0          | 0.0          | 0.0         | 0.0          | <b>100.0</b> | 0.0          | 0.0         | 0.0          | 0.0          | 0.0          | <b>100.0</b> | 0.0          | <b>100.0</b> | 0.0 | <b>99.9</b> | 0.0          | 0.0 | <b>100.0</b> | 0.0          | 0.0          | 0.0 |
| -                             | 0.0          | 0.0          | 0.0          | 0.0         | 0.0          | 0.0          | 0.0          | 0.0         | 0.0          | 0.0          | 0.0          | 0.0          | 0.0          | 0.0          | 0.0 | 0.0         | 0.0          | 0.0 | 0.0          | 0.0          | 0.0          | 0.0 |

  

| evoA1-seBE<br>IRES -Rap Rep 3 | PAM          |              |             | 20  |              |     | 15  |     |     | 10          |              |     | 5   |     |     | 1   |     |     |     |              |              |
|-------------------------------|--------------|--------------|-------------|-----|--------------|-----|-----|-----|-----|-------------|--------------|-----|-----|-----|-----|-----|-----|-----|-----|--------------|--------------|
|                               | C            | C            | C           | G   | C            | T   | G   | G   | C   | A           | T            | C   | T   | G   | T   | G   | C   | T   | G   | A            | A            |
| A                             | 0.0          | 0.0          | 0.0         | 0.0 | 0.0          | 0.0 | 0.0 | 0.1 | 0.0 | 0.0         | <b>100.0</b> | 0.0 | 0.0 | 0.0 | 0.0 | 1.4 | 0.0 | 0.0 | 1.9 | <b>100.0</b> | <b>100.0</b> |
| C                             | <b>100.0</b> | <b>100.0</b> | <b>99.9</b> | 0.0 | <b>100.0</b> | 0.0 | 0.0 | 0.0 | 0.0 | <b>99.9</b> | 0.           |     |     |     |     |     |     |     |     |              |              |

# Supplementary Figure 2

| <b>b</b>                       |   | <b>CDA Q104*</b> |              |              |             |              |              |              |              |              |              |              |              |              |              |              |              |              |              |              |              |              |              |              |              |              |     |              |              |
|--------------------------------|---|------------------|--------------|--------------|-------------|--------------|--------------|--------------|--------------|--------------|--------------|--------------|--------------|--------------|--------------|--------------|--------------|--------------|--------------|--------------|--------------|--------------|--------------|--------------|--------------|--------------|-----|--------------|--------------|
|                                |   | C102             |              |              |             | R103         |              |              |              | Q104         |              |              |              | V105         |              |              |              | M106         |              |              |              | R107         |              |              |              | E108         |     |              |              |
|                                |   | C                | T            | G            | C           | A            | G            | G            | C            | A            | A            | G            | T            | C            | A            | T            | G            | A            | G            | A            | G            | A            | G            | A            | G            | A            | G   | A            | G            |
| untreated                      | A | 0.0              | 0.0          | 0.1          | 0.0         | <b>99.9</b>  | 0.0          | 0.1          | 0.0          | <b>100.0</b> | <b>100.0</b> | 0.0          | 0.0          | 0.0          | <b>100.0</b> | 0.0          | 0.0          | <b>100.0</b> | 0.0          | 0.0          | <b>100.0</b> | 0.0          | 0.0          | 0.0          | 0.0          | 0.0          | 0.0 | 0.0          | 0.0          |
|                                | C | <b>100.0</b>     | 0.0          | 0.0          | <b>99.9</b> | 0.0          | 0.0          | 0.0          | <b>100.0</b> | 0.0          | 0.0          | 0.0          | 0.0          | <b>100.0</b> | 0.0          | 0.0          | 0.0          | 0.0          | 0.0          | 0.0          | 0.0          | 0.0          | 0.0          | 0.0          | 0.0          | 0.0          | 0.0 | 0.0          | 0.0          |
|                                | G | 0.0              | 0.0          | <b>99.9</b>  | 0.0         | 0.1          | <b>100.0</b> | <b>99.9</b>  | 0.0          | 0.0          | 0.0          | <b>100.0</b> | 0.0          | 0.0          | 0.0          | 0.0          | 0.0          | <b>100.0</b> | 0.0          | 0.0          | <b>100.0</b> | 0.0          | 0.0          | <b>100.0</b> | 0.0          | <b>100.0</b> | 0.0 | <b>100.0</b> | <b>100.0</b> |
|                                | T | 0.0              | <b>100.0</b> | 0.0          | 0.1         | 0.0          | 0.0          | 0.0          | 0.0          | 0.0          | 0.0          | 0.0          | 0.0          | <b>100.0</b> | 0.0          | 0.0          | <b>100.0</b> | 0.0          | 0.0          | 0.0          | 0.0          | 0.0          | 0.0          | 0.0          | 0.0          | 0.0          | 0.0 | 0.0          | 0.0          |
|                                | - | 0.0              | 0.0          | 0.0          | 0.0         | 0.0          | 0.0          | 0.0          | 0.0          | 0.0          | 0.0          | 0.0          | 0.0          | 0.0          | 0.0          | 0.0          | 0.0          | 0.0          | 0.0          | 0.0          | 0.0          | 0.0          | 0.0          | 0.0          | 0.0          | 0.0          | 0.0 | 0.0          | 0.0          |
| evoA1-seBE-<br>Replicate 1     | A | 0.2              | 0.0          | 0.1          | 0.8         | <b>99.3</b>  | 0.2          | 0.0          | 0.3          | <b>99.1</b>  | <b>99.1</b>  | 0.0          | 0.0          | 0.2          | <b>99.4</b>  | 0.0          | 0.1          | <b>99.7</b>  | 0.1          | <b>99.7</b>  | 0.0          | <b>99.8</b>  | 0.0          | <b>99.8</b>  | 0.1          | 0.0          | 0.0 | 0.0          | 0.0          |
|                                | C | <b>79.9</b>      | 0.0          | 0.0          | <b>43.9</b> | 0.0          | 0.0          | 0.0          | <b>47.0</b>  | 0.0          | 0.0          | 0.0          | 0.0          | <b>91.9</b>  | 0.0          | 0.0          | 0.0          | 0.0          | 0.0          | 0.0          | 0.0          | 0.0          | 0.0          | 0.0          | 0.0          | 0.0          | 0.0 | 0.0          | 0.0          |
|                                | G | 0.0              | 0.0          | <b>99.4</b>  | 0.4         | 0.0          | <b>99.0</b>  | <b>99.1</b>  | 1.9          | 0.0          | 0.0          | <b>99.2</b>  | 0.0          | 0.0          | 0.0          | 0.0          | <b>99.4</b>  | 0.0          | <b>99.6</b>  | 0.0          | <b>99.8</b>  | 0.0          | <b>99.8</b>  | 0.0          | <b>99.7</b>  | <b>99.9</b>  | 0.0 | 0.0          | 0.0          |
|                                | T | <b>19.3</b>      | <b>99.6</b>  | 0.0          | <b>54.2</b> | 0.0          | 0.1          | 0.0          | <b>49.4</b>  | 0.0          | 0.0          | <b>99.2</b>  | 7.2          | 0.0          | <b>99.5</b>  | 0.0          | 0.0          | 0.0          | 0.0          | 0.1          | 0.0          | 0.0          | 0.0          | 0.1          | 0.0          | 0.0          | 0.1 | 0.0          | 0.0          |
|                                | - | 0.5              | 0.4          | 0.4          | 0.7         | 0.6          | 0.8          | 0.8          | 1.4          | 0.9          | 0.9          | 0.8          | 0.7          | 0.6          | 0.5          | 0.5          | 0.3          | 0.3          | 0.2          | 0.3          | 0.2          | 0.2          | 0.1          | 0.1          | 0.1          | 0.1          | 0.1 | 0.1          | 0.0          |
| evoA1-seBE-<br>Replicate 2     | A | 0.3              | 0.0          | 0.0          | 0.7         | <b>99.2</b>  | 0.4          | 0.1          | 0.5          | <b>99.1</b>  | <b>99.2</b>  | 0.0          | 0.0          | 0.0          | <b>99.5</b>  | 0.0          | 0.1          | <b>99.6</b>  | 0.1          | <b>99.8</b>  | 0.0          | <b>99.9</b>  | 0.1          | <b>99.9</b>  | 0.1          | 0.0          | 0.0 | 0.0          | 0.0          |
|                                | C | <b>79.9</b>      | 0.0          | 0.0          | <b>44.5</b> | 0.0          | 0.0          | 0.0          | <b>47.7</b>  | 0.0          | 0.0          | 0.0          | 0.0          | <b>90.9</b>  | 0.0          | 0.0          | 0.0          | 0.0          | 0.0          | 0.0          | 0.0          | 0.0          | 0.0          | 0.0          | 0.0          | 0.0          | 0.0 | 0.0          | 0.0          |
|                                | G | 0.0              | 0.0          | <b>99.4</b>  | 0.3         | 0.0          | <b>98.7</b>  | <b>99.0</b>  | 1.8          | 0.0          | 0.0          | <b>99.2</b>  | 0.0          | 0.0          | 0.0          | 0.0          | <b>99.4</b>  | 0.0          | <b>99.6</b>  | 0.0          | <b>99.8</b>  | 0.0          | <b>99.8</b>  | 0.0          | <b>99.8</b>  | <b>100.0</b> | 0.0 | 0.0          | 0.0          |
|                                | T | <b>19.2</b>      | <b>99.5</b>  | 0.0          | <b>53.7</b> | 0.0          | 0.1          | 0.0          | <b>48.8</b>  | 0.0          | 0.0          | <b>99.3</b>  | 8.4          | 0.0          | <b>99.6</b>  | 0.0          | 0.0          | 0.0          | 0.0          | 0.0          | 0.0          | 0.0          | 0.0          | 0.0          | 0.0          | 0.0          | 0.0 | 0.0          | 0.0          |
|                                | - | 0.6              | 0.5          | 0.5          | 0.8         | 0.8          | 0.9          | 0.9          | 1.2          | 0.9          | 0.8          | 0.8          | 0.7          | 0.7          | 0.5          | 0.4          | 0.4          | 0.3          | 0.3          | 0.2          | 0.2          | 0.1          | 0.1          | 0.1          | 0.1          | 0.1          | 0.1 | 0.1          | 0.0          |
| evoA1-seBE-<br>Replicate 3     | A | 0.1              | 0.0          | 0.0          | 0.7         | <b>99.2</b>  | 0.2          | 0.0          | 0.3          | <b>99.3</b>  | <b>99.3</b>  | 0.0          | 0.0          | 0.0          | <b>99.6</b>  | 0.0          | 0.0          | <b>99.7</b>  | 0.2          | <b>99.9</b>  | 0.1          | <b>99.9</b>  | 0.1          | <b>99.9</b>  | 0.2          | 0.0          | 0.0 | 0.0          | 0.0          |
|                                | C | <b>81.7</b>      | 0.0          | 0.0          | <b>47.9</b> | 0.0          | 0.0          | 0.0          | <b>51.3</b>  | 0.0          | 0.0          | 0.0          | 0.0          | <b>91.9</b>  | 0.0          | 0.0          | 0.0          | 0.0          | 0.0          | 0.0          | 0.0          | 0.0          | 0.0          | 0.0          | 0.0          | 0.0          | 0.0 | 0.0          | 0.0          |
|                                | G | 0.0              | 0.0          | <b>99.4</b>  | 0.2         | 0.0          | <b>99.0</b>  | <b>99.1</b>  | 1.7          | 0.0          | 0.0          | <b>99.3</b>  | 0.0          | 0.2          | 0.0          | 0.0          | <b>99.6</b>  | 0.0          | <b>99.7</b>  | 0.0          | <b>99.8</b>  | 0.0          | <b>99.7</b>  | <b>99.9</b>  | <b>99.9</b>  | 0.0          | 0.0 | 0.0          |              |
|                                | T | <b>17.6</b>      | <b>99.4</b>  | 0.0          | <b>50.4</b> | 0.0          | 0.0          | 0.0          | <b>45.3</b>  | 0.0          | 0.0          | <b>99.4</b>  | 7.5          | 0.0          | <b>99.7</b>  | 0.0          | 0.0          | 0.0          | 0.0          | 0.0          | 0.0          | 0.0          | 0.0          | 0.0          | 0.0          | 0.0          | 0.0 | 0.0          | 0.0          |
|                                | - | 0.6              | 0.6          | 0.5          | 0.8         | 0.7          | 0.7          | 0.8          | 1.4          | 0.7          | 0.7          | 0.7          | 0.6          | 0.5          | 0.4          | 0.3          | 0.3          | 0.2          | 0.1          | 0.1          | 0.1          | 0.1          | 0.1          | 0.1          | 0.1          | 0.1          | 0.1 | 0.1          | 0.0          |
| evoA1-seBE-<br>IRES +Rap Rep 1 | A | 0.1              | 0.0          | 0.0          | 0.1         | <b>99.8</b>  | 0.0          | 0.0          | 0.1          | <b>99.7</b>  | <b>99.8</b>  | 0.0          | 0.0          | 0.0          | <b>99.9</b>  | 0.0          | 0.0          | <b>99.9</b>  | 0.0          | <b>99.9</b>  | 0.0          | <b>100.0</b> | 0.0          | <b>100.0</b> | 0.0          | 0.0          | 0.0 | 0.0          | 0.0          |
|                                | C | <b>88.7</b>      | 0.0          | 0.0          | <b>63.4</b> | 0.0          | 0.0          | 0.0          | <b>68.2</b>  | 0.0          | 0.0          | 0.0          | 0.0          | <b>94.9</b>  | 0.0          | 0.0          | 0.0          | 0.0          | 0.0          | 0.0          | 0.0          | 0.0          | 0.0          | 0.0          | 0.0          | 0.0          | 0.0 | 0.0          | 0.0          |
|                                | G | 0.0              | 0.0          | <b>99.7</b>  | 0.1         | 0.0          | <b>99.8</b>  | <b>99.7</b>  | 0.9          | 0.0          | 0.0          | <b>99.8</b>  | 0.0          | 0.0          | 0.0          | 0.0          | <b>99.9</b>  | 0.1          | <b>99.9</b>  | 0.0          | <b>100.0</b> | 0.0          | <b>100.0</b> | 0.0          | <b>99.9</b>  | <b>100.0</b> | 0.0 | 0.0          |              |
|                                | T | <b>11.1</b>      | <b>99.8</b>  | 0.1          | <b>36.1</b> | 0.0          | 0.0          | 0.0          | <b>30.4</b>  | 0.0          | 0.0          | <b>99.8</b>  | 5.0          | 0.0          | <b>99.9</b>  | 0.0          | 0.0          | 0.0          | 0.0          | 0.0          | 0.0          | 0.0          | 0.0          | 0.0          | 0.0          | 0.0          | 0.0 | 0.0          | 0.0          |
|                                | - | 0.2              | 0.1          | 0.2          | 0.3         | 0.2          | 0.2          | 0.3          | 0.4          | 0.2          | 0.2          | 0.2          | 0.1          | 0.1          | 0.1          | 0.1          | 0.1          | 0.0          | 0.0          | 0.1          | 0.0          | 0.0          | 0.0          | 0.0          | 0.0          | 0.0          | 0.0 | 0.0          | 0.0          |
| evoA1-seBE-<br>IRES +Rap Rep 2 | A | 0.1              | 0.0          | 0.0          | 0.3         | <b>99.6</b>  | 0.1          | 0.0          | 0.1          | <b>99.6</b>  | <b>99.8</b>  | 0.0          | 0.0          | 0.0          | <b>99.8</b>  | 0.0          | 0.0          | <b>99.9</b>  | 0.0          | <b>100.0</b> | 0.0          | <b>100.0</b> | 0.0          | <b>100.0</b> | 0.0          | 0.0          | 0.0 | 0.0          | 0.0          |
|                                | C | <b>88.4</b>      | 0.0          | 0.0          | <b>61.8</b> | 0.0          | 0.0          | 0.0          | <b>66.3</b>  | 0.0          | 0.0          | 0.0          | 0.0          | <b>94.3</b>  | 0.0          | 0.0          | 0.0          | 0.0          | 0.0          | 0.0          | 0.0          | 0.0          | 0.0          | 0.0          | 0.0          | 0.0          | 0.0 | 0.0          | 0.0          |
|                                | G | 0.0              | 0.0          | <b>99.7</b>  | 0.2         | 0.1          | <b>99.5</b>  | <b>99.5</b>  | 1.3          | 0.0          | 0.0          | <b>99.8</b>  | 0.0          | 0.0          | 0.0          | 0.0          | <b>99.9</b>  | 0.0          | <b>99.9</b>  | 0.0          | <b>100.0</b> | 0.0          | <b>100.0</b> | 0.0          | <b>99.9</b>  | <b>100.0</b> | 0.0 | 0.0          |              |
|                                | T | <b>11.2</b>      | <b>99.7</b>  | 0.0          | <b>37.4</b> | 0.0          | 0.0          | 0.0          | <b>31.7</b>  | 0.0          | 0.0          | <b>99.8</b>  | 5.4          | 0.0          | <b>99.8</b>  | 0.0          | 0.0          | 0.0          | 0.0          | 0.0          | 0.0          | 0.0          | 0.0          | 0.0          | 0.0          | 0.0          | 0.0 | 0.0          | 0.0          |
|                                | - | 0.3              | 0.3          | 0.3          | 0.4         | 0.3          | 0.4          | 0.5          | 0.7          | 0.4          | 0.2          | 0.2          | 0.2          | 0.2          | 0.2          | 0.1          | 0.1          | 0.1          | 0.1          | 0.1          | 0.1          | 0.0          | 0.0          | 0.0          | 0.0          | 0.0          | 0.0 | 0.0          | 0.0          |
| evoA1-seBE-<br>IRES +Rap Rep 3 | A | 0.0              | 0.0          | 0.0          | 0.2         | <b>99.8</b>  | 0.1          | 0.0          | 0.1          | <b>99.9</b>  | <b>99.9</b>  | 0.0          | 0.0          | 0.0          | <b>99.8</b>  | 0.0          | 0.0          | <b>99.9</b>  | 0.0          | <b>99.9</b>  | 0.0          | <b>100.0</b> | 0.0          | <b>100.0</b> | 0.0          | 0.0          | 0.0 | 0.0          | 0.0          |
|                                | C | <b>88.7</b>      | 0.0          | 0.0          | <b>62.2</b> | 0.0          | 0.0          | 0.0          | <b>66.4</b>  | 0.0          | 0.0          | 0.0          | 0.0          | <b>94.2</b>  | 0.0          | 0.0          | 0.0          | 0.0          | 0.0          | 0.0          | 0.0          | 0.0          | 0.0          | 0.0          | 0.0          | 0.0          | 0.0 | 0.0          | 0.0          |
|                                | G | 0.0              | 0.0          | <b>99.9</b>  | 0.1         | 0.0          | <b>99.8</b>  | <b>99.9</b>  | 0.7          | 0.0          | 0.0          | <b>99.9</b>  | 0.0          | 0.0          | 0.0          | 0.0          | <b>99.9</b>  | 0.1          | <b>100.0</b> | 0.0          | <b>100.0</b> | 0.0          | <b>100.0</b> | 0.0          | <b>100.0</b> | <b>100.0</b> | 0.0 | 0.0          |              |
|                                | T | <b>11.2</b>      | <b>99.9</b>  | 0.0          | <b>37.4</b> | 0.0          | 0.0          | 0.0          | <b>32.5</b>  | 0.0          | 0.0          | <b>99.8</b>  | 5.7          | 0.0          | <b>99.9</b>  | 0.0          | 0.0          | 0.0          | 0.0          | 0.0          | 0.0          | 0.0          | 0.0          | 0.0          | 0.0          | 0.0          | 0.0 | 0.0          | 0.0          |
|                                | - | 0.1              | 0.1          | 0.1          | 0.1         | 0.1          | 0.1          | 0.1          | 0.3          | 0.1          | 0.1          | 0.1          | 0.1          | 0.1          | 0.1          | 0.1          | 0.1          | 0.0          | 0.0          | 0.0          | 0.0          | 0.0          | 0.0          | 0.0          | 0.0          | 0.0          | 0.0 | 0.0          | 0.0          |
| evoA1-seBE-<br>IRES -Rap Rep 1 | A | 0.0              | 0.0          | 0.0          | 0.0         | <b>100.0</b> | 0.0          | 0.0          | 0.0          | <b>100.0</b> | <b>100.0</b> | 0.0          | 0.0          | 0.0          | <b>100.0</b> | 0.0          | 0.0          | <b>100.0</b> | 0.0 | 0.0          | 0.0          |
|                                | C | <b>99.8</b>      | 0.0          | 0.0          | <b>97.6</b> | 0.0          | 0.0          | 0.0          | <b>98.6</b>  | 0.0          | 0.0          | 0.0          | 0.0          | <b>99.8</b>  | 0.0          | 0.0          | 0.0          | 0.0          | 0.0          | 0.0          | 0.0          | 0.0          | 0.0          | 0.0          | 0.0          | 0.0          | 0.0 | 0.0          | 0.0          |
|                                | G | 0.0              | 0.0          | <b>100.0</b> | 0.0         | 0.0          | <b>100.0</b> | <b>99.9</b>  | 0.0          | 0.0          | 0.0          | <b>100.0</b> | 0.0          | 0.0          | 0.0          | 0.0          | <b>100.0</b> | <b>100.0</b> | 0.0 | 0.0          |              |
|                                | T | 0.2              | <b>100.0</b> | 0.0          | 2.4         | 0.0          | 0.0          | 0.0          | 1.4          | 0.0          | 0.0          | 0.0          | <b>100.0</b> | 0.2          | 0.0          | <b>100.0</b> | 0.0          | 0.0          | 0.0          | 0.0          | 0.0          | 0.0          | 0.0          | 0.0          | 0.0          | 0.0          | 0.0 | 0.0          | 0.0          |
|                                | - | 0.0              | 0.0          | 0.0          | 0.0         | 0.0          | 0.0          | 0.0          | 0.0          | 0.0          | 0.0          | 0.0          | 0.0          | 0.0          | 0.0          | 0.0          | 0.0          | 0.0          | 0.0          | 0.0          | 0.0          | 0.0          | 0.0          | 0.0          | 0.0          | 0.0          | 0.0 | 0.0          | 0.0          |
| evoA1-seBE-<br>IRES -Rap Rep 2 | A | 0.0              | 0.0          | 0.0          | 0.0         | <b>100.0</b> | 0.0          | 0.0          | 0.0          | <b>100.0</b> | <b>100.0</b> | 0.0          | 0.0          | 0.0          | <b>100.0</b> | 0.0          | 0.0          | <b>100.0</b> | 0.0 | 0.0          | 0.0          |
|                                | C | <b>99.8</b>      | 0.0          | 0.0          | <b>97.8</b> | 0.0          | 0.0          | 0.0          | <b>98.8</b>  | 0.0          | 0.0          | 0.0          | 0.0          | <b>99.8</b>  | 0.0          | 0.0          | 0.0          | 0.0          | 0.0          | 0.0          | 0.0          | 0.0          | 0.0          | 0.0          | 0.0          | 0.0          | 0.0 | 0.0          | 0.0          |
|                                | G | 0.0              | 0.0          | <b>100.0</b> | 0.0         | 0.0          | <b>100.0</b> | <b>100.0</b> | 0.0          | 0.0          | 0.0          | <b>100.0</b> | 0.0          | 0.0          | 0.0          | 0.0          | <b>100.0</b> | <b>100.0</b> | 0.0 | 0.0          |              |
|                                | T | 0.2              | <b>100.0</b> | 0.0          | 2.2         | 0.0          | 0.0          |              |              |              |              |              |              |              |              |              |              |              |              |              |              |              |              |              |              |              |     |              |              |

# Supplementary Figure 2

|           |   | c          |      |       |       |       |     |       |      |      |       |       |      |      |      |      |      |      |      |      |       |       |      |     |      |
|-----------|---|------------|------|-------|-------|-------|-----|-------|------|------|-------|-------|------|------|------|------|------|------|------|------|-------|-------|------|-----|------|
|           |   | IDH2 R172K |      |       |       |       |     |       |      |      |       |       |      |      |      |      |      |      |      |      |       |       |      |     |      |
| untreated |   | P167       |      |       | I168  |       |     | T169  |      |      | I170  |       |      | G171 |      |      | R172 |      |      | H173 |       |       |      |     |      |
|           | A | C          | C    | C     | A     | T     | C   | A     | C    | C    | A     | T     | T    | G    | G    | C    | A    | G    | G    | C    | A     | C     | G    | C   |      |
|           |   | A          | 0.0  | 0.0   | 0.0   | 99.9  | 0.0 | 0.0   | 99.9 | 0.0  | 0.0   | 100.0 | 0.0  | 0.0  | 0.2  | 0.2  | 0.0  | 99.9 | 0.5  | 0.5  | 0.0   | 100.0 | 0.0  | 0.1 | 0.0  |
|           |   | C          | 99.9 | 100.0 | 100.0 | 0.0   | 0.0 | 100.0 | 0.0  | 99.9 | 100.0 | 0.0   | 0.0  | 0.0  | 0.0  | 0.0  | 99.9 | 0.0  | 0.0  | 0.0  | 100.0 | 0.0   | 99.9 | 0.0 | 99.9 |
|           |   | G          | 0.0  | 0.0   | 0.0   | 0.0   | 0.0 | 0.0   | 0.0  | 0.0  | 0.0   | 0.0   | 0.0  | 0.0  | 99.8 | 99.8 | 0.0  | 0.1  | 99.4 | 99.5 | 0.0   | 0.0   | 0.0  | 0.0 | 99.9 |
|           | T | 0.1        | 0.0  | 0.0   | 0.0   | 100.0 | 0.0 | 0.0   | 0.0  | 0.0  | 0.0   | 100.0 | 99.9 | 0.0  | 0.0  | 0.0  | 0.0  | 0.0  | 0.0  | 0.0  | 0.0   | 0.0   | 0.0  | 0.0 |      |
|           | - | 0.0        | 0.0  | 0.0   | 0.0   | 0.0   | 0.0 | 0.0   | 0.0  | 0.0  | 0.0   | 0.0   | 0.0  | 0.0  | 0.0  | 0.0  | 0.0  | 0.0  | 0.0  | 0.0  | 0.0   | 0.0   | 0.0  | 0.0 |      |

  

| evoA1-seBE<br>Replicate 1 |   | PAM |      |      | 20   |      |     | 15   |      |      | 10   |      |      | 5   |      |      | 1    |      |      |      |      |      |      |     |      |
|---------------------------|---|-----|------|------|------|------|-----|------|------|------|------|------|------|-----|------|------|------|------|------|------|------|------|------|-----|------|
|                           | A | C   | C    | C    | A    | T    | C   | A    | C    | C    | A    | T    | T    | G   | G    | C    | A    | G    | G    | C    | A    | C    | G    | C   |      |
|                           |   | A   | 0.0  | 0.0  | 0.0  | 99.9 | 0.0 | 0.0  | 99.6 | 0.0  | 0.0  | 99.5 | 0.0  | 0.0 | 14.8 | 6.7  | 0.0  | 99.3 | 40.6 | 40.6 | 0.0  | 99.3 | 0.0  | 6.9 | 0.0  |
|                           |   | C   | 99.9 | 99.9 | 99.9 | 0.0  | 0.0 | 99.8 | 0.0  | 99.6 | 99.6 | 0.0  | 0.0  | 0.0 | 0.1  | 0.0  | 99.3 | 0.0  | 0.5  | 0.3  | 99.3 | 0.0  | 99.6 | 0.0 | 99.6 |
|                           |   | G   | 0.0  | 0.0  | 0.0  | 0.0  | 0.0 | 0.0  | 0.1  | 0.0  | 0.0  | 0.0  | 0.0  | 0.0 | 84.5 | 92.6 | 0.0  | 0.0  | 57.2 | 57.6 | 0.0  | 0.0  | 0.0  | 0.0 | 92.7 |
|                           | T | 0.0 | 0.0  | 0.0  | 0.0  | 99.9 | 0.0 | 0.0  | 0.1  | 0.0  | 0.0  | 99.4 | 99.4 | 0.1 | 0.0  | 0.1  | 0.0  | 0.9  | 0.7  | 0.0  | 0.0  | 0.0  | 0.1  | 0.0 |      |
|                           | - | 0.0 | 0.0  | 0.0  | 0.0  | 0.0  | 0.1 | 0.3  | 0.3  | 0.4  | 0.4  | 0.5  | 0.5  | 0.6 | 0.7  | 0.6  | 0.7  | 0.8  | 0.8  | 0.6  | 0.7  | 0.6  | 0.4  | 0.3 |      |

  

| evoA1-seBE<br>Replicate 2 |   | PAM |      |      | 20   |      |     | 15   |      |      | 10   |      |      | 5   |      |      | 1    |      |      |      |      |      |      |     |      |
|---------------------------|---|-----|------|------|------|------|-----|------|------|------|------|------|------|-----|------|------|------|------|------|------|------|------|------|-----|------|
|                           | A | C   | C    | C    | A    | T    | C   | A    | C    | C    | A    | T    | T    | G   | G    | C    | A    | G    | G    | C    | A    | C    | G    | C   |      |
|                           |   | A   | 0.0  | 0.0  | 0.0  | 99.9 | 0.0 | 0.0  | 99.7 | 0.0  | 0.0  | 99.7 | 0.0  | 0.0 | 15.3 | 7.4  | 0.0  | 99.2 | 38.9 | 39.1 | 0.0  | 99.4 | 0.0  | 6.7 | 0.0  |
|                           |   | C   | 99.9 | 99.9 | 99.9 | 0.0  | 0.0 | 99.8 | 0.1  | 99.8 | 99.7 | 0.0  | 0.0  | 0.0 | 0.1  | 0.0  | 99.3 | 0.0  | 0.3  | 0.4  | 99.3 | 0.0  | 99.6 | 0.0 | 99.6 |
|                           |   | G   | 0.0  | 0.0  | 0.0  | 0.0  | 0.0 | 0.0  | 0.0  | 0.0  | 0.0  | 0.0  | 0.0  | 0.0 | 84.1 | 91.8 | 0.0  | 0.0  | 59.1 | 59.2 | 0.0  | 0.0  | 0.0  | 0.0 | 92.9 |
|                           | T | 0.0 | 0.0  | 0.1  | 0.0  | 99.9 | 0.0 | 0.0  | 0.0  | 0.0  | 0.0  | 99.5 | 99.4 | 0.1 | 0.0  | 0.0  | 0.0  | 0.8  | 0.5  | 0.0  | 0.0  | 0.0  | 0.1  | 0.0 |      |
|                           | - | 0.0 | 0.0  | 0.0  | 0.0  | 0.0  | 0.1 | 0.2  | 0.2  | 0.3  | 0.3  | 0.5  | 0.6  | 0.6 | 0.7  | 0.7  | 0.8  | 0.8  | 0.8  | 0.6  | 0.7  | 0.6  | 0.4  | 0.3 |      |

  

| evoA1-seBE<br>Replicate 3 |   | PAM |      |      | 20   |      |     | 15   |      |      | 10   |      |      | 5   |      |      | 1    |      |      |      |      |      |      |     |      |
|---------------------------|---|-----|------|------|------|------|-----|------|------|------|------|------|------|-----|------|------|------|------|------|------|------|------|------|-----|------|
|                           | A | C   | C    | C    | A    | T    | C   | A    | C    | C    | A    | T    | T    | G   | G    | C    | A    | G    | G    | C    | A    | C    | G    | C   |      |
|                           |   | A   | 0.0  | 0.0  | 0.0  | 99.9 | 0.0 | 0.0  | 99.6 | 0.0  | 0.0  | 99.6 | 0.0  | 0.0 | 13.3 | 5.5  | 0.0  | 99.4 | 35.7 | 35.9 | 0.0  | 99.4 | 0.0  | 6.3 | 0.0  |
|                           |   | C   | 99.9 | 99.9 | 99.9 | 0.0  | 0.0 | 99.8 | 0.0  | 99.6 | 99.6 | 0.0  | 0.0  | 0.0 | 0.1  | 0.0  | 99.3 | 0.0  | 0.3  | 0.4  | 99.4 | 0.0  | 99.5 | 0.0 | 99.6 |
|                           |   | G   | 0.0  | 0.0  | 0.0  | 0.0  | 0.0 | 0.0  | 0.0  | 0.0  | 0.0  | 0.0  | 0.0  | 0.0 | 86.0 | 93.8 | 0.0  | 0.0  | 62.3 | 62.4 | 0.0  | 0.0  | 0.0  | 0.0 | 93.2 |
|                           | T | 0.0 | 0.0  | 0.0  | 0.0  | 99.9 | 0.0 | 0.0  | 0.0  | 0.0  | 0.0  | 99.5 | 99.4 | 0.1 | 0.0  | 0.1  | 0.0  | 0.9  | 0.7  | 0.0  | 0.0  | 0.0  | 0.1  | 0.0 |      |
|                           | - | 0.0 | 0.1  | 0.1  | 0.1  | 0.1  | 0.2 | 0.3  | 0.3  | 0.3  | 0.4  | 0.5  | 0.5  | 0.6 | 0.6  | 0.6  | 0.6  | 0.7  | 0.7  | 0.6  | 0.7  | 0.6  | 0.4  | 0.3 |      |

  

| evoA1-seBE<br>IRES +Rap Rep 1 |   | PAM |       |       | 20    |       |     | 15    |      |      | 10   |      |      | 5   |      |      | 1    |      |      |      |      |      |       |     |       |
|-------------------------------|---|-----|-------|-------|-------|-------|-----|-------|------|------|------|------|------|-----|------|------|------|------|------|------|------|------|-------|-----|-------|
|                               | A | C   | C     | C     | A     | T     | C   | A     | C    | C    | A    | T    | T    | G   | G    | C    | A    | G    | G    | C    | A    | C    | G     | C   |       |
|                               |   | A   | 0.0   | 0.0   | 0.0   | 100.0 | 0.0 | 0.0   | 99.9 | 0.0  | 0.0  | 99.9 | 0.0  | 0.0 | 7.7  | 2.7  | 0.0  | 99.9 | 25.7 | 24.9 | 0.0  | 99.9 | 0.0   | 3.3 | 0.0   |
|                               |   | C   | 100.0 | 100.0 | 100.0 | 0.0   | 0.0 | 100.0 | 0.0  | 99.9 | 99.9 | 0.0  | 0.0  | 0.0 | 0.0  | 0.0  | 99.9 | 0.0  | 0.2  | 0.3  | 99.9 | 0.0  | 100.0 | 0.0 | 100.0 |
|                               |   | G   | 0.0   | 0.0   | 0.0   | 0.0   | 0.0 | 0.0   | 0.0  | 0.0  | 0.0  | 0.0  | 0.0  | 0.0 | 92.1 | 97.1 | 0.0  | 0.0  | 73.8 | 74.5 | 0.0  | 0.0  | 0.0   | 0.0 | 96.6  |
|                               | T | 0.0 | 0.0   | 0.0   | 0.0   | 100.0 | 0.0 | 0.0   | 0.0  | 0.0  | 0.0  | 99.9 | 99.9 | 0.0 | 0.0  | 0.0  | 0.0  | 0.2  | 0.2  | 0.0  | 0.0  | 0.0  | 0.0   | 0.0 |       |
|                               | - | 0.0 | 0.0   | 0.0   | 0.0   | 0.0   | 0.0 | 0.0   | 0.1  | 0.1  | 0.1  | 0.1  | 0.1  | 0.1 | 0.1  | 0.1  | 0.1  | 0.1  | 0.1  | 0.1  | 0.1  | 0.0  | 0.0   | 0.0 |       |

  

| evoA1-seBE<br>IRES +Rap Rep 2 |   | PAM |       |       | 20    |       |     | 15    |      |      | 10   |      |      | 5   |      |      | 1    |      |      |      |      |      |      |     |      |
|-------------------------------|---|-----|-------|-------|-------|-------|-----|-------|------|------|------|------|------|-----|------|------|------|------|------|------|------|------|------|-----|------|
|                               | A | C   | C     | C     | A     | T     | C   | A     | C    | C    | A    | T    | T    | G   | G    | C    | A    | G    | G    | C    | A    | C    | G    | C   |      |
|                               |   | A   | 0.0   | 0.0   | 0.0   | 100.0 | 0.0 | 0.0   | 99.9 | 0.0  | 0.0  | 99.9 | 0.0  | 0.0 | 7.1  | 2.5  | 0.0  | 99.8 | 24.2 | 23.5 | 0.0  | 99.8 | 0.0  | 3.0 | 0.0  |
|                               |   | C   | 100.0 | 100.0 | 100.0 | 0.0   | 0.0 | 100.0 | 0.1  | 99.9 | 99.9 | 0.0  | 0.0  | 0.0 | 0.0  | 0.0  | 99.8 | 0.0  | 0.2  | 0.3  | 99.8 | 0.0  | 99.9 | 0.0 | 99.9 |
|                               |   | G   | 0.0   | 0.0   | 0.0   | 0.0   | 0.0 | 0.0   | 0.0  | 0.0  | 0.0  | 0.0  | 0.0  | 0.0 | 92.7 | 97.2 | 0.0  | 0.0  | 75.2 | 75.9 | 0.0  | 0.0  | 0.0  | 0.0 | 96.9 |
|                               | T | 0.0 | 0.0   | 0.0   | 0.0   | 100.0 | 0.0 | 0.0   | 0.0  | 0.0  | 0.0  | 99.8 | 99.8 | 0.0 | 0.0  | 0.0  | 0.0  | 0.2  | 0.2  | 0.0  | 0.0  | 0.1  | 0.0  | 0.0 |      |
|                               | - | 0.0 | 0.0   | 0.0   | 0.0   | 0.0   | 0.1 | 0.1   | 0.1  | 0.1  | 0.1  | 0.2  | 0.2  | 0.2 | 0.1  | 0.1  | 0.2  | 0.2  | 0.2  | 0.1  | 0.1  | 0.1  | 0.1  | 0.1 |      |

  

| evoA1-seBE<br>IRES +Rap Rep 3 |   | PAM |       |       | 20    |       |     | 15    |      |      | 10    |      |      | 5   |      |      | 1    |      |      |      |      |      |      |     |       |
|-------------------------------|---|-----|-------|-------|-------|-------|-----|-------|------|------|-------|------|------|-----|------|------|------|------|------|------|------|------|------|-----|-------|
|                               | A | C   | C     | C     | A     | T     | C   | A     | C    | C    | A     | T    | T    | G   | G    | C    | A    | G    | G    | C    | A    | C    | G    | C   |       |
|                               |   | A   | 0.0   | 0.0   | 0.0   | 100.0 | 0.0 | 0.0   | 99.9 | 0.0  | 0.0   | 99.9 | 0.0  | 0.0 | 6.6  | 2.5  | 0.0  | 99.8 | 22.4 | 22.0 | 0.0  | 99.9 | 0.0  | 2.8 | 0.0   |
|                               |   | C   | 100.0 | 100.0 | 100.0 | 0.0   | 0.0 | 100.0 | 0.1  | 99.9 | 100.0 | 0.0  | 0.0  | 0.0 | 0.0  | 0.0  | 99.8 | 0.0  | 0.2  | 0.2  | 99.9 | 0.0  | 99.9 | 0.0 | 100.0 |
|                               |   | G   | 0.0   | 0.0   | 0.0   | 0.0   | 0.0 | 0.0   | 0.0  | 0.0  | 0.0   | 0.0  | 0.0  | 0.0 | 93.3 | 97.4 | 0.0  | 0.0  | 77.1 | 77.6 | 0.0  | 0.0  | 0.0  | 0.0 | 97.1  |
|                               | T | 0.0 | 0.0   | 0.0   | 0.0   | 100.0 | 0.0 | 0.0   | 0.0  | 0.0  | 0.0   | 99.9 | 99.9 | 0.0 | 0.0  | 0.0  | 0.0  | 0.1  | 0.1  | 0.0  | 0.0  | 0.1  | 0.0  | 0.0 |       |
|                               | - | 0.0 | 0.0   | 0.0   | 0.0   | 0.0   | 0.0 | 0.0   | 0.0  | 0.0  | 0.0   | 0.1  | 0.1  | 0.1 | 0.1  | 0.1  | 0.1  | 0.1  | 0.1  | 0.1  | 0.1  | 0.0  | 0.0  | 0.0 |       |

  

| evoA1-seBE<br>IRES -Rap Rep 1 |   | PAM |       |       | 20    |       |     | 15   |      |       | 10    |       |       | 5   |      |      | 1     |       |      |      |       |       |      |     |       |
|-------------------------------|---|-----|-------|-------|-------|-------|-----|------|------|-------|-------|-------|-------|-----|------|------|-------|-------|------|------|-------|-------|------|-----|-------|
|                               | A | C   | C     | C     | A     | T     | C   | A    | C    | C     | A     | T     | T     | G   | G    | C    | A     | G     | G    | C    | A     | C     | G    | C   |       |
|                               |   | A   | 0.0   | 0.0   | 0.0   | 100.0 | 0.0 | 0.0  | 99.9 | 0.0   | 0.0   | 100.0 | 0.0   | 0.0 | 0.3  | 0.1  | 0.0   | 100.0 | 1.4  | 1.2  | 0.0   | 100.0 | 0.0  | 0.1 | 0.0   |
|                               |   | C   | 100.0 | 100.0 | 100.0 | 0.0   | 0.0 | 99.9 | 0.0  | 100.0 | 100.0 | 0.0   | 0.0   | 0.0 | 0.0  | 0.0  | 100.0 | 0.0   | 0.0  | 0.0  | 100.0 | 0.0   | 99.9 | 0.0 | 100.0 |
|                               |   | G   | 0.0   | 0.0   | 0.0   | 0.0   | 0.0 | 0.0  | 0.0  | 0.0   | 0.0   | 0.0   | 0.0   | 0.0 | 99.7 | 99.9 | 0.0   | 0.0   | 98.6 | 98.7 | 0.0   | 0.0   | 0.0  | 0.0 | 99.9  |
|                               | T | 0.0 | 0.0   | 0.0   | 0.0   | 100.0 | 0.0 | 0.0  | 0.0  | 0.0   | 0.0   | 100.0 | 100.0 | 0.0 | 0.0  | 0.0  | 0.0   | 0.0   | 0.1  | 0.0  | 0.0   | 0.0   | 0.0  | 0.0 |       |
|                               | - | 0.0 | 0.0   | 0.0   | 0.0   | 0.0   | 0.0 | 0.0  | 0.0  | 0.0   | 0.0   | 0.0   | 0.0   | 0.0 | 0.0  | 0.0  | 0.0   | 0.0   | 0.0  | 0.0  | 0.0   | 0.0   | 0.0  | 0.0 |       |

  

| evoA1-seBE<br>IRES -Rap Rep 2 |   | PAM |       |       | 20    |       |     | 15    |      |       | 10    |       |       | 5   |      |      | 1     |       |      |      |       |       |      |     |       |
|-------------------------------|---|-----|-------|-------|-------|-------|-----|-------|------|-------|-------|-------|-------|-----|------|------|-------|-------|------|------|-------|-------|------|-----|-------|
|                               | A | C   | C     | C     | A     | T     | C   | A     | C    | C     | A     | T     | T     | G   | G    | C    | A     | G     | G    | C    | A     | C     | G    | C   |       |
|                               |   | A   | 0.0   | 0.0   | 0.0   | 100.0 | 0.0 | 0.0   | 99.9 | 0.0   | 0.0   | 100.0 | 0.0   | 0.0 | 0.2  | 0.0  | 0.0   | 100.0 | 1.5  | 1.4  | 0.0   | 100.0 | 0.0  | 0.1 | 0.0   |
|                               |   | C   | 100.0 | 100.0 | 100.0 | 0.0   | 0.0 | 100.0 | 0.1  | 100.0 | 100.0 | 0.0   | 0.0   | 0.0 | 0.0  | 0.0  | 100.0 | 0.0   | 0.0  | 0.0  | 100.0 | 0.0   | 99.9 | 0.0 | 100.0 |
|                               |   | G   | 0.0   | 0.0   | 0.0   | 0.0   | 0.0 | 0.0   | 0.0  | 0.0   | 0.0   | 0.0   | 0.0   | 0.0 | 99.8 | 99.9 | 0.0   | 0.0   | 98.5 | 98.5 | 0.0   | 0.0   | 0.0  | 0.0 | 99.9  |
|                               | T | 0.0 | 0.0   | 0.0   | 0.0   | 99.9  | 0.0 | 0.0   | 0.0  | 0.0   | 0.0   | 100.0 | 100.0 | 0.0 | 0.0  | 0.0  | 0.0   | 0.0   | 0.0  | 0.0  | 0.0   | 0.0   | 0.0  | 0.0 |       |
|                               | - | 0.0 | 0.0   | 0.0   | 0.0   | 0.0   | 0.0 | 0.0   | 0.0  | 0.0   | 0.0   | 0.0   | 0.0   | 0.0 | 0.0  | 0.0  | 0.0   | 0.0   | 0.0  | 0.0  | 0.0   | 0.0   | 0.0  | 0.0 |       |

  

| evoA1-seBE<br>IRES -Rap Rep 3 |  | PAM |  |  | 20 |  |  | 15 |  |  |
|-------------------------------|--|-----|--|--|----|--|--|----|--|--|
|-------------------------------|--|-----|--|--|----|--|--|----|--|--|

# Supplementary Figure 2

| d         |   | EMXI |      |      |      |      |      |      |     |      |      |      |      |      |     |      |      |     |      |      |     |      |      |      |      |      |      |      |      |   |   |      |  |  |  |  |
|-----------|---|------|------|------|------|------|------|------|-----|------|------|------|------|------|-----|------|------|-----|------|------|-----|------|------|------|------|------|------|------|------|---|---|------|--|--|--|--|
|           |   | E225 |      |      |      |      | S226 |      |     |      |      | E227 |      |      |     |      | Q228 |     |      |      |     | K229 |      |      |      |      | K230 |      |      |   |   | K231 |  |  |  |  |
|           |   | G    | A    | G    | T    | C    | C    | G    | A   | G    | C    | A    | G    | A    | A   | G    | A    | A   | G    | A    | A   | G    | A    | A    | G    | A    | A    | A    | G    | A | A |      |  |  |  |  |
| untreated | A | 0.0  | 99.9 | 0.0  | 0.0  | 0.0  | 0.0  | 99.9 | 0.0 | 0.0  | 99.8 | 0.0  | 99.7 | 99.9 | 0.0 | 99.9 | 99.9 | 0.0 | 99.9 | 99.9 | 0.0 | 99.4 | 99.6 | 0.0  | 0.0  | 0.0  | 0.0  | 0.0  | 0.0  |   |   |      |  |  |  |  |
|           | C | 0.0  | 0.0  | 0.0  | 0.0  | 99.8 | 99.8 | 0.0  | 0.0 | 0.0  | 99.8 | 0.0  | 0.0  | 0.1  | 0.0 | 0.0  | 0.0  | 0.0 | 0.0  | 0.0  | 0.0 | 0.0  | 0.0  | 0.0  | 0.0  | 0.0  | 0.0  | 0.0  | 0.0  |   |   |      |  |  |  |  |
|           | G | 99.9 | 0.0  | 99.8 | 0.1  | 0.0  | 0.0  | 99.8 | 0.0 | 99.9 | 0.1  | 0.1  | 99.9 | 0.1  | 0.1 | 99.7 | 0.0  | 0.0 | 99.5 | 0.1  | 0.0 | 99.8 | 99.8 | 99.8 | 99.8 | 99.8 | 99.8 | 99.8 | 99.8 |   |   |      |  |  |  |  |
|           | T | 0.0  | 0.0  | 0.1  | 99.7 | 0.2  | 0.1  | 0.1  | 0.0 | 0.1  | 0.1  | 0.0  | 0.0  | 0.0  | 0.2 | 0.0  | 0.0  | 0.0 | 0.1  | 0.1  | 0.0 | 0.1  | 0.1  | 0.0  | 0.1  | 0.1  | 0.1  | 0.1  | 0.1  |   |   |      |  |  |  |  |
|           | - | 0.0  | 0.0  | 0.0  | 0.0  | 0.0  | 0.0  | 0.0  | 0.0 | 0.0  | 0.0  | 0.0  | 0.0  | 0.0  | 0.0 | 0.0  | 0.0  | 0.0 | 0.4  | 0.4  | 0.4 | 0.0  | 0.0  | 0.0  | 0.0  | 0.0  | 0.0  | 0.0  | 0.0  |   |   |      |  |  |  |  |

  

| evoA1-seBE-<br>Replicate 1 | PAM  |      |      |      |      |      |      |      |      |      |      |      |      |      |      |      |      |      |      |      |      |      |      |      |      |      |      |      |   |
|----------------------------|------|------|------|------|------|------|------|------|------|------|------|------|------|------|------|------|------|------|------|------|------|------|------|------|------|------|------|------|---|
|                            | I    |      |      |      |      | 5    |      |      |      |      | 10   |      |      |      |      | 15   |      |      |      |      | 20   |      |      |      |      |      |      |      |   |
|                            | G    | A    | G    | T    | C    | C    | G    | A    | G    | C    | A    | G    | A    | A    | G    | A    | A    | G    | A    | A    | G    | A    | A    | G    | A    | A    | A    | G    | A |
| A                          | 0.4  | 99.8 | 0.0  | 0.0  | 0.5  | 0.2  | 0.0  | 99.6 | 0.0  | 0.0  | 99.7 | 0.0  | 99.7 | 99.8 | 0.0  | 99.8 | 99.8 | 0.0  | 99.4 | 99.5 | 0.0  | 0.0  | 0.0  | 0.0  | 0.0  | 0.0  | 0.0  | 0.0  |   |
| C                          | 0.2  | 0.0  | 0.0  | 0.0  | 55.8 | 56.9 | 0.0  | 0.0  | 0.0  | 95.8 | 0.0  | 0.0  | 0.0  | 0.0  | 0.0  | 0.0  | 0.0  | 0.0  | 0.0  | 0.0  | 0.0  | 0.0  | 0.0  | 0.0  | 0.0  | 0.0  | 0.0  | 0.0  |   |
| G                          | 99.1 | 0.1  | 99.8 | 0.3  | 1.1  | 0.3  | 99.7 | 0.1  | 99.7 | 0.0  | 0.0  | 99.8 | 0.0  | 0.0  | 99.8 | 0.0  | 0.0  | 99.5 | 0.0  | 0.0  | 99.9 | 99.9 | 99.9 | 99.9 | 99.9 | 99.9 | 99.9 | 99.9 |   |
| T                          | 0.1  | 0.0  | 0.0  | 99.4 | 42.4 | 42.3 | 0.0  | 0.0  | 0.0  | 3.9  | 0.0  | 0.0  | 0.0  | 0.0  | 0.0  | 0.0  | 0.0  | 0.0  | 0.0  | 0.0  | 0.0  | 0.0  | 0.0  | 0.0  | 0.0  | 0.0  | 0.0  | 0.0  |   |
| -                          | 0.0  | 0.0  | 0.0  | 0.0  | 0.0  | 0.0  | 0.0  | 0.0  | 0.0  | 0.0  | 0.0  | 0.0  | 0.0  | 0.0  | 0.0  | 0.0  | 0.0  | 0.0  | 0.0  | 0.0  | 0.0  | 0.0  | 0.0  | 0.0  | 0.0  | 0.0  | 0.0  | 0.0  |   |

  

| evoA1-seBE-<br>Replicate 2 | PAM  |      |      |      |      |      |      |      |      |      |      |      |      |      |      |      |      |      |      |      |      |      |      |      |      |      |      |      |   |
|----------------------------|------|------|------|------|------|------|------|------|------|------|------|------|------|------|------|------|------|------|------|------|------|------|------|------|------|------|------|------|---|
|                            | I    |      |      |      |      | 5    |      |      |      |      | 10   |      |      |      |      | 15   |      |      |      |      | 20   |      |      |      |      |      |      |      |   |
|                            | G    | A    | G    | T    | C    | C    | G    | A    | G    | C    | A    | G    | A    | A    | G    | A    | A    | G    | A    | A    | G    | A    | A    | G    | A    | A    | A    | G    | A |
| A                          | 0.5  | 99.7 | 0.0  | 0.0  | 0.5  | 0.3  | 0.0  | 99.7 | 0.0  | 0.1  | 99.7 | 0.0  | 99.8 | 99.8 | 0.0  | 99.9 | 99.8 | 0.0  | 99.6 | 99.6 | 0.0  | 0.0  | 0.0  | 0.0  | 0.0  | 0.0  | 0.0  | 0.0  |   |
| C                          | 0.1  | 0.0  | 0.0  | 0.0  | 55.8 | 57.4 | 0.0  | 0.0  | 0.0  | 95.2 | 0.0  | 0.0  | 0.0  | 0.0  | 0.0  | 0.0  | 0.0  | 0.0  | 0.0  | 0.0  | 0.0  | 0.0  | 0.0  | 0.0  | 0.0  | 0.0  | 0.0  | 0.0  |   |
| G                          | 99.1 | 0.1  | 99.8 | 0.3  | 1.5  | 0.5  | 99.7 | 0.1  | 99.7 | 0.0  | 0.0  | 99.8 | 0.0  | 0.0  | 99.8 | 0.0  | 0.0  | 99.5 | 0.0  | 0.0  | 99.9 | 99.9 | 99.9 | 99.9 | 99.9 | 99.9 | 99.9 | 99.9 |   |
| T                          | 0.1  | 0.0  | 0.0  | 99.5 | 41.9 | 41.5 | 0.0  | 0.0  | 0.0  | 4.5  | 0.0  | 0.0  | 0.0  | 0.0  | 0.0  | 0.0  | 0.0  | 0.0  | 0.0  | 0.0  | 0.0  | 0.0  | 0.0  | 0.0  | 0.0  | 0.0  | 0.0  | 0.0  |   |
| -                          | 0.0  | 0.0  | 0.0  | 0.0  | 0.0  | 0.0  | 0.0  | 0.0  | 0.0  | 0.0  | 0.0  | 0.0  | 0.0  | 0.0  | 0.0  | 0.0  | 0.0  | 0.0  | 0.0  | 0.0  | 0.0  | 0.0  | 0.0  | 0.0  | 0.0  | 0.0  | 0.0  | 0.0  |   |

  

| evoA1-seBE-<br>Replicate 3 | PAM  |      |      |      |      |      |      |      |      |      |      |      |      |      |      |      |      |      |      |      |      |      |      |      |      |      |      |      |   |
|----------------------------|------|------|------|------|------|------|------|------|------|------|------|------|------|------|------|------|------|------|------|------|------|------|------|------|------|------|------|------|---|
|                            | I    |      |      |      |      | 5    |      |      |      |      | 10   |      |      |      |      | 15   |      |      |      |      | 20   |      |      |      |      |      |      |      |   |
|                            | G    | A    | G    | T    | C    | C    | G    | A    | G    | C    | A    | G    | A    | A    | G    | A    | A    | G    | A    | A    | G    | A    | A    | G    | A    | A    | A    | G    | A |
| A                          | 0.6  | 99.7 | 0.0  | 0.0  | 0.6  | 0.1  | 0.0  | 99.7 | 0.1  | 0.0  | 99.7 | 0.0  | 99.8 | 99.7 | 0.0  | 99.8 | 99.8 | 0.0  | 99.6 | 99.6 | 0.0  | 0.0  | 0.0  | 0.0  | 0.0  | 0.0  | 0.0  | 0.0  |   |
| C                          | 0.1  | 0.0  | 0.0  | 0.0  | 60.1 | 60.0 | 0.0  | 0.0  | 0.0  | 95.1 | 0.0  | 0.0  | 0.0  | 0.0  | 0.0  | 0.0  | 0.0  | 0.0  | 0.0  | 0.0  | 0.0  | 0.0  | 0.0  | 0.0  | 0.0  | 0.0  | 0.0  | 0.0  |   |
| G                          | 99.1 | 0.1  | 99.8 | 0.2  | 1.3  | 0.3  | 99.7 | 0.0  | 99.7 | 0.0  | 0.0  | 99.7 | 0.0  | 0.0  | 99.8 | 0.0  | 0.0  | 99.6 | 0.0  | 0.0  | 99.8 | 99.9 | 99.8 | 99.8 | 99.8 | 99.8 | 99.8 | 99.8 |   |
| T                          | 0.1  | 0.0  | 0.0  | 99.6 | 39.2 | 39.2 | 0.0  | 0.0  | 0.0  | 4.6  | 0.0  | 0.0  | 0.0  | 0.0  | 0.0  | 0.0  | 0.0  | 0.0  | 0.0  | 0.0  | 0.0  | 0.0  | 0.0  | 0.0  | 0.0  | 0.0  | 0.0  | 0.0  |   |
| -                          | 0.0  | 0.0  | 0.0  | 0.0  | 0.0  | 0.0  | 0.0  | 0.0  | 0.0  | 0.0  | 0.0  | 0.0  | 0.0  | 0.0  | 0.0  | 0.0  | 0.0  | 0.0  | 0.0  | 0.0  | 0.0  | 0.0  | 0.0  | 0.0  | 0.0  | 0.0  | 0.0  | 0.0  |   |

  

| evoA1-seBE-<br>IRES +Rap Rep 1 | PAM  |      |       |      |      |      |      |      |      |      |      |      |      |      |      |       |      |      |      |      |      |      |      |      |      |      |      |      |   |
|--------------------------------|------|------|-------|------|------|------|------|------|------|------|------|------|------|------|------|-------|------|------|------|------|------|------|------|------|------|------|------|------|---|
|                                | I    |      |       |      |      | 5    |      |      |      |      | 10   |      |      |      |      | 15    |      |      |      |      | 20   |      |      |      |      |      |      |      |   |
|                                | G    | A    | G     | T    | C    | C    | G    | A    | G    | C    | A    | G    | A    | A    | G    | A     | A    | G    | A    | A    | G    | A    | A    | G    | A    | A    | A    | G    | A |
| A                              | 0.1  | 99.9 | 0.0   | 0.0  | 0.1  | 0.0  | 0.0  | 99.9 | 0.0  | 0.0  | 99.9 | 0.0  | 99.9 | 99.9 | 0.0  | 100.0 | 99.9 | 0.0  | 99.6 | 99.6 | 0.0  | 0.0  | 0.0  | 0.0  | 0.0  | 0.0  | 0.0  | 0.0  |   |
| C                              | 0.0  | 0.0  | 0.0   | 0.0  | 72.5 | 72.6 | 0.0  | 0.0  | 0.0  | 97.8 | 0.0  | 0.0  | 0.0  | 0.0  | 0.0  | 0.0   | 0.0  | 0.0  | 0.0  | 0.0  | 0.0  | 0.0  | 0.0  | 0.0  | 0.0  | 0.0  | 0.0  | 0.0  |   |
| G                              | 99.9 | 0.1  | 100.0 | 0.2  | 0.1  | 0.0  | 99.9 | 0.0  | 99.9 | 0.0  | 0.1  | 99.9 | 0.0  | 0.0  | 99.9 | 0.0   | 0.0  | 99.6 | 0.0  | 0.0  | 99.9 | 99.9 | 99.9 | 99.9 | 99.9 | 99.9 | 99.9 | 99.9 |   |
| T                              | 0.0  | 0.0  | 0.0   | 99.7 | 27.2 | 27.2 | 0.0  | 0.0  | 0.0  | 2.2  | 0.0  | 0.0  | 0.0  | 0.0  | 0.0  | 0.0   | 0.0  | 0.0  | 0.0  | 0.0  | 0.0  | 0.0  | 0.0  | 0.0  | 0.0  | 0.0  | 0.0  | 0.0  |   |
| -                              | 0.0  | 0.0  | 0.0   | 0.0  | 0.0  | 0.0  | 0.0  | 0.0  | 0.0  | 0.0  | 0.0  | 0.0  | 0.0  | 0.0  | 0.0  | 0.0   | 0.0  | 0.0  | 0.0  | 0.0  | 0.0  | 0.0  | 0.0  | 0.0  | 0.0  | 0.0  | 0.0  | 0.0  |   |

  

| evoA1-seBE-<br>IRES +Rap Rep 2 | PAM  |      |      |      |      |      |      |      |      |      |      |      |      |       |       |       |      |      |      |      |       |       |      |      |      |      |      |      |   |
|--------------------------------|------|------|------|------|------|------|------|------|------|------|------|------|------|-------|-------|-------|------|------|------|------|-------|-------|------|------|------|------|------|------|---|
|                                | I    |      |      |      |      | 5    |      |      |      |      | 10   |      |      |       |       | 15    |      |      |      |      | 20    |       |      |      |      |      |      |      |   |
|                                | G    | A    | G    | T    | C    | C    | G    | A    | G    | C    | A    | G    | A    | A     | G     | A     | A    | G    | A    | A    | G     | A     | A    | G    | A    | A    | A    | G    | A |
| A                              | 0.0  | 99.9 | 0.0  | 0.0  | 0.0  | 0.0  | 0.0  | 99.9 | 0.0  | 0.0  | 99.9 | 0.0  | 99.9 | 100.0 | 0.0   | 100.0 | 99.9 | 0.0  | 99.7 | 99.7 | 0.0   | 0.0   | 0.0  | 0.0  | 0.0  | 0.0  | 0.0  | 0.0  |   |
| C                              | 0.0  | 0.0  | 0.0  | 0.0  | 74.3 | 74.2 | 0.0  | 0.0  | 0.0  | 97.8 | 0.0  | 0.0  | 0.0  | 0.0   | 0.0   | 0.0   | 0.0  | 0.0  | 0.0  | 0.0  | 0.0   | 0.0   | 0.0  | 0.0  | 0.0  | 0.0  | 0.0  | 0.0  |   |
| G                              | 99.9 | 0.0  | 99.9 | 0.2  | 0.2  | 0.0  | 99.9 | 0.0  | 99.9 | 0.0  | 0.0  | 99.9 | 0.0  | 0.0   | 100.0 | 0.0   | 0.0  | 99.7 | 0.0  | 0.0  | 100.0 | 100.0 | 99.9 | 99.9 | 99.9 | 99.9 | 99.9 | 99.9 |   |
| T                              | 0.0  | 0.0  | 0.0  | 99.7 | 25.3 | 25.6 | 0.0  | 0.0  | 0.0  | 2.1  | 0.0  | 0.0  | 0.0  | 0.0   | 0.0   | 0.0   | 0.0  | 0.0  | 0.0  | 0.0  | 0.0   | 0.0   | 0.0  | 0.0  | 0.0  | 0.0  | 0.0  | 0.0  |   |
| -                              | 0.0  | 0.0  | 0.0  | 0.0  | 0.0  | 0.0  | 0.0  | 0.0  | 0.0  | 0.0  | 0.0  | 0.0  | 0.0  | 0.0   | 0.0   | 0.0   | 0.0  | 0.0  | 0.0  | 0.0  | 0.0   | 0.0   | 0.0  | 0.0  | 0.0  | 0.0  | 0.0  | 0.0  |   |

  

| evoA1-seBE-<br>IRES +Rap Rep 3 | PAM  |      |      |      |      |      |      |      |      |      |      |      |      |      |      |      |      |      |      |      |      |      |      |      |      |      |      |      |   |
|--------------------------------|------|------|------|------|------|------|------|------|------|------|------|------|------|------|------|------|------|------|------|------|------|------|------|------|------|------|------|------|---|
|                                | I    |      |      |      |      | 5    |      |      |      |      | 10   |      |      |      |      | 15   |      |      |      |      | 20   |      |      |      |      |      |      |      |   |
|                                | G    | A    | G    | T    | C    | C    | G    | A    | G    | C    | A    | G    | A    | A    | G    | A    | A    | G    | A    | A    | G    | A    | A    | G    | A    | A    | A    | G    | A |
| A                              | 0.1  | 99.7 | 0.0  | 0.0  | 0.0  | 0.0  | 0.0  | 99.8 | 0.0  | 0.0  | 99.8 | 0.0  | 99.7 | 99.7 | 0.0  | 99.7 | 99.8 | 0.0  | 99.5 | 99.5 | 0.0  | 0.0  | 0.0  | 0.0  | 0.0  | 0.0  | 0.0  | 0.0  |   |
| C                              | 0.0  | 0.0  | 0.0  | 0.0  | 74.1 | 74.2 | 0.0  | 0.0  | 0.0  | 97.5 | 0.0  | 0.0  | 0.0  | 0.0  | 0.0  | 0.0  | 0.0  | 0.0  | 0.0  | 0.0  | 0.0  | 0.0  | 0.0  | 0.0  | 0.0  | 0.0  | 0.0  | 0.0  |   |
| G                              | 99.7 | 0.1  | 99.8 | 0.2  | 0.3  | 0.0  | 99.8 | 0.0  | 99.8 | 0.0  | 0.0  | 99.8 | 0.0  | 0.0  | 99.7 | 0.0  | 0.0  | 99.5 | 0.0  | 0.0  | 99.7 | 99.8 | 99.8 | 99.7 | 99.8 | 99.7 | 99.8 | 99.7 |   |
| T                              | 0.1  | 0.0  | 0.0  | 99.6 | 25.3 | 25.6 | 0.0  | 0.0  | 0.0  | 2.3  | 0.0  | 0.0  | 0.0  | 0.0  | 0.0  | 0.0  | 0.0  | 0.0  | 0.0  | 0.0  | 0.0  | 0.0  | 0.0  | 0.0  | 0.0  | 0.0  | 0.0  | 0.0  |   |
| -                              | 0.0  | 0.0  | 0.0  | 0.0  | 0.0  | 0.0  | 0.0  | 0.0  | 0.0  | 0.0  | 0.0  | 0.0  | 0.0  | 0.0  | 0.0  | 0.0  | 0.0  | 0.0  | 0.0  | 0.0  | 0.0  | 0.0  | 0.0  | 0.0  | 0.0  | 0.0  | 0.0  | 0.0  |   |

  

| evoA1-seBE-<br>IRES -Rap Rep 1 | PAM  |       |       |      |      |      |      |      |      |      |      |       |      |       |       |       |       |      |      |      |      |      |      |      |      |      |      |      |   |
|--------------------------------|------|-------|-------|------|------|------|------|------|------|------|------|-------|------|-------|-------|-------|-------|------|------|------|------|------|------|------|------|------|------|------|---|
|                                | I    |       |       |      |      | 5    |      |      |      |      | 10   |       |      |       |       | 15    |       |      |      |      | 20   |      |      |      |      |      |      |      |   |
|                                | G    | A     | G     | T    | C    | C    | G    | A    | G    | C    | A    | G     | A    | A     | G     | A     | A     | G    | A    | A    | G    | A    | A    | G    | A    | A    | A    | G    | A |
| A                              | 0.0  | 100.0 | 0.0   | 0.0  | 0.0  | 0.0  | 0.0  | 99.9 | 0.0  | 0.0  | 99.9 | 0.0   | 99.9 | 100.0 | 0.0   | 100.0 | 100.0 | 0.0  | 99.8 | 99.7 | 0.0  | 0.0  | 0.0  | 0.0  | 0.0  | 0.0  | 0.0  | 0.0  |   |
| C                              | 0.0  | 0.0   | 0.0   | 0.0  | 97.9 | 98.1 | 0.0  | 0.0  | 0.0  | 99.9 | 0.0  | 0.0   | 0.0  | 0.0   | 0.0   | 0.0   | 0.0   | 0.0  | 0.0  | 0.0  | 0.0  | 0.0  | 0.0  | 0.0  | 0.0  | 0.0  | 0.0  | 0.0  |   |
| G                              | 99.9 | 0.0   | 100.0 | 0.2  | 0.0  | 0.0  | 99.9 | 0.0  | 99.9 | 0.0  | 0.0  | 100.0 | 0.0  | 0.0   | 100.0 | 0.0   | 0.0   | 99.7 | 0.0  | 0.0  | 99.9 | 99.9 | 99.9 | 99.9 | 99.9 | 99.9 | 99.9 | 99.9 |   |
| T                              | 0.1  | 0.0   | 0.0   | 99.8 | 2.1  | 1.8  | 0.0  | 0.0  | 0.0  | 0.1  | 0.0  | 0.0   | 0.0  | 0.0   | 0.0   | 0.0   | 0.0   | 0.0  | 0.0  | 0.0  | 0.0  | 0.0  | 0.0  | 0.0  | 0.0  | 0.0  | 0.0  | 0.0  |   |
| -                              | 0.0  | 0.0   | 0.0   | 0.0  | 0.0  | 0.0  | 0.0  | 0.0  | 0.0  | 0.0  | 0.0  | 0.0   | 0.0  | 0.0   | 0.0   | 0.0   | 0.0   | 0.0  | 0.0  | 0.0  | 0.0  | 0.0  | 0.0  | 0.0  | 0.0  | 0.0  | 0.0  | 0.0  |   |

  

| evoA1-seBE-<br>IRES -Rap Rep 2 | PAM |   |   |   |   |   |   |   |   |  |    |  |  |  |  |    |  |  |  |  |    |  |  |  |  |
|--------------------------------|-----|---|---|---|---|---|---|---|---|--|----|--|--|--|--|----|--|--|--|--|----|--|--|--|--|
|                                | I   |   |   |   |   | 5 |   |   |   |  | 10 |  |  |  |  | 15 |  |  |  |  | 20 |  |  |  |  |
|                                | G   | A | G | T | C | C | G | A | G |  |    |  |  |  |  |    |  |  |  |  |    |  |  |  |  |





**Supplementary Figure 3. Base editing efficiency of AID'-seBE-IRES constructs in human cells at diverse loci and off-target sites.** The frequency of individual base calls at each locus of interest are shown, colored using a heat map from white (0%) to red (100%). The parent sequence is shown with PAM (yellow) and sgRNA protospacer (black) noted. When the PAM is at right, the coding strand cytosine (C) targeted for mutation is highlighted in red. When the PAM is at left, the non-coding strand cytosine is targeted, and the associated coding strand (G) is highlighted in red. The data in Fig. 3c show the quantification of conversion at the target base only, with individual loci shown in Extended Data Fig. 5c. Results across each locus with individual replicates are shown using untreated cells (n = 1), along with intact AID'-BE4max or AID'-seBE-IRES with or without rapamycin (n = 3 each). The loci analyzed and desired mutations are (a) CDA E67R targeting the active site residue, (b) CDA Q104\* nonsense mutation, (c) IDH2 R172K neomorphic mutation, (d) validated EMX1 targeting site, (e) validated EMX1 OT1 (f) validated EMX1 OT2.

# Supplementary Figure 3

| <b>a</b>                           |   | <b><i>CDA E67R</i></b> |              |             |             |              |              |              |              |             |             |              |              |              |              |             |              |             |              |              |             |              |              |              |     |  |
|------------------------------------|---|------------------------|--------------|-------------|-------------|--------------|--------------|--------------|--------------|-------------|-------------|--------------|--------------|--------------|--------------|-------------|--------------|-------------|--------------|--------------|-------------|--------------|--------------|--------------|-----|--|
|                                    |   | P61                    |              |             | L62         |              |              | G63          |              |             | I64         |              |              | C65          |              |             | A66          |             |              | E67          |             |              |              |              |     |  |
|                                    |   | C                      | C            | C           | G           | C            | T            | G            | G            | G           | C           | A            | T            | C            | T            | G           | G            | C           | T            | G            | A           | A            |              | C            |     |  |
| untreated                          | A | 0.0                    | 0.0          | 0.0         | 0.1         | 0.0          | 0.0          | 0.0          | 0.1          | 0.0         | <b>99.9</b> | 0.0          | 0.0          | 0.0          | 0.0          | 0.0         | 0.1          | 0.0         | 0.0          | 0.1          | 0.0         | 0.0          | 0.0          | 0.0          |     |  |
|                                    | C | <b>99.9</b>            | <b>100.0</b> | <b>99.9</b> | 0.0         | <b>100.0</b> | 0.0          | 0.0          | 0.0          | 0.0         | <b>99.9</b> | 0.0          | 0.0          | <b>100.0</b> | 0.0          | 0.0         | 0.0          | <b>99.9</b> | 0.0          | 0.0          | 0.0         | 0.0          | 0.0          | <b>100.0</b> |     |  |
|                                    | G | 0.0                    | 0.0          | 0.0         | <b>99.9</b> | 0.0          | 0.0          | <b>100.0</b> | <b>99.9</b>  | <b>99.9</b> | 0.0         | 0.0          | 0.0          | 0.0          | <b>100.0</b> | 0.0         | <b>99.9</b>  | 0.0         | 0.0          | <b>99.9</b>  | 0.0         | 0.0          | <b>99.9</b>  | 0.0          |     |  |
|                                    | T | 0.0                    | 0.0          | 0.0         | 0.0         | 0.0          | <b>99.9</b>  | 0.0          | 0.0          | 0.0         | 0.0         | 0.0          | <b>100.0</b> | 0.0          | <b>100.0</b> | 0.0         | <b>99.9</b>  | 0.0         | 0.1          | <b>100.0</b> | 0.0         | 0.0          | 0.0          | 0.0          |     |  |
|                                    | - | 0.0                    | 0.0          | 0.0         | 0.0         | 0.0          | 0.0          | 0.0          | 0.0          | 0.0         | 0.0         | 0.0          | 0.0          | 0.0          | 0.0          | 0.0         | 0.0          | 0.0         | 0.0          | 0.0          | 0.0         | 0.0          | 0.0          | 0.0          |     |  |
| AID-seB4max<br>Replicate 1         | A | 0.0                    | 0.1          | 0.4         | 0.2         | 0.1          | 0.0          | 1.8          | 0.9          | 11.2        | 0.1         | <b>99.7</b>  | 0.0          | 0.1          | 0.0          | 37.3        | 0.0          | 38.7        | 0.1          | 0.0          | 37.9        | <b>99.7</b>  | <b>99.8</b>  | 0.0          |     |  |
|                                    | C | <b>99.9</b>            | <b>99.8</b>  | <b>99.6</b> | 0.0         | <b>99.8</b>  | 0.0          | 0.0          | 0.0          | 0.0         | <b>99.6</b> | 0.0          | 0.0          | <b>99.4</b>  | 0.0          | 0.2         | 0.1          | 0.1         | <b>98.9</b>  | 0.0          | 0.0         | 0.0          | 0.0          | <b>99.0</b>  |     |  |
|                                    | G | 0.0                    | 0.0          | 0.0         | <b>99.7</b> | 0.0          | 0.0          | <b>97.6</b>  | <b>98.7</b>  | <b>88.5</b> | 0.0         | 0.0          | 0.0          | 0.0          | 0.0          | <b>61.8</b> | 0.0          | <b>60.6</b> | 0.0          | 0.0          | <b>61.6</b> | 0.0          | 0.0          | 0.0          |     |  |
|                                    | T | 0.1                    | 0.0          | 0.0         | 0.1         | 0.0          | <b>99.9</b>  | 0.3          | 0.1          | 0.1         | 0.0         | <b>99.7</b>  | 0.1          | <b>99.5</b>  | 0.2          | <b>99.4</b> | 0.1          | 0.5         | <b>99.6</b>  | 0.2          | 0.0         | 0.0          | 0.0          | 0.8          |     |  |
|                                    | - | 0.0                    | 0.1          | 0.1         | 0.1         | 0.1          | 0.1          | 0.3          | 0.2          | 0.2         | 0.3         | 0.3          | 0.4          | 0.4          | 0.4          | 0.4         | 0.5          | 0.5         | 0.4          | 0.4          | 0.5         | 0.2          | 0.2          | 0.2          | 0.2 |  |
| AID-seB4max<br>Replicate 2         | A | 0.0                    | 0.3          | 0.7         | 0.2         | 0.1          | 0.0          | 2.6          | 1.0          | 11.9        | 0.2         | <b>99.5</b>  | 0.0          | 0.1          | 0.0          | 41.0        | 0.0          | 42.4        | 0.2          | 0.0          | 41.8        | <b>99.5</b>  | <b>99.5</b>  | 0.1          |     |  |
|                                    | C | <b>99.9</b>            | <b>99.7</b>  | <b>99.3</b> | 0.0         | <b>99.8</b>  | 0.0          | 0.0          | 0.0          | 0.0         | <b>99.4</b> | 0.0          | 0.0          | <b>99.2</b>  | 0.0          | 0.5         | 0.0          | 0.1         | <b>98.5</b>  | 0.0          | 0.0         | 0.0          | 0.0          | <b>98.6</b>  |     |  |
|                                    | G | 0.0                    | 0.0          | 0.0         | <b>99.8</b> | 0.0          | 0.0          | <b>96.4</b>  | <b>98.5</b>  | <b>87.5</b> | 0.0         | 0.0          | 0.0          | 0.0          | 0.0          | <b>57.5</b> | 0.0          | <b>56.5</b> | 0.1          | 0.0          | <b>57.3</b> | 0.0          | 0.0          | 0.1          |     |  |
|                                    | T | 0.0                    | 0.0          | 0.0         | 0.0         | 0.0          | <b>99.9</b>  | 0.6          | 0.1          | 0.2         | 0.0         | <b>99.5</b>  | 0.1          | <b>99.4</b>  | 0.2          | <b>99.1</b> | 0.2          | 0.5         | <b>99.2</b>  | 0.2          | 0.2         | 0.0          | 0.0          | 0.8          |     |  |
|                                    | - | 0.0                    | 0.0          | 0.0         | 0.0         | 0.1          | 0.1          | 0.4          | 0.3          | 0.3         | 0.4         | 0.4          | 0.5          | 0.6          | 0.7          | 0.8         | 0.8          | 0.8         | 0.8          | 0.8          | 0.7         | 0.5          | 0.5          | 0.5          | 0.5 |  |
| AID-seB4max<br>Replicate 3         | A | 0.0                    | 0.0          | 0.1         | 0.3         | 0.0          | 0.0          | 2.6          | 1.2          | 13.2        | 0.0         | <b>99.6</b>  | 0.0          | 0.0          | 0.0          | 45.0        | 0.0          | 46.6        | 0.1          | 0.0          | 45.8        | <b>99.5</b>  | <b>99.6</b>  | 0.1          |     |  |
|                                    | C | <b>99.8</b>            | <b>99.9</b>  | <b>99.8</b> | 0.0         | <b>99.9</b>  | 0.0          | 0.0          | 0.0          | 0.1         | <b>99.6</b> | 0.0          | 0.0          | <b>99.3</b>  | 0.0          | 0.5         | 0.0          | 0.1         | <b>98.4</b>  | 0.0          | 0.1         | 0.0          | 0.0          | <b>98.5</b>  |     |  |
|                                    | G | 0.0                    | 0.0          | 0.0         | <b>99.6</b> | 0.0          | 0.0          | <b>97.0</b>  | <b>98.5</b>  | <b>86.3</b> | 0.0         | 0.0          | 0.0          | 0.0          | 0.0          | <b>53.6</b> | 0.0          | <b>52.5</b> | 0.1          | 0.0          | <b>53.5</b> | 0.0          | 0.0          | 0.0          |     |  |
|                                    | T | 0.1                    | 0.0          | 0.0         | 0.0         | 0.0          | <b>99.9</b>  | 0.6          | 0.3          | 0.1         | 0.0         | <b>99.4</b>  | 0.1          | <b>99.4</b>  | 0.2          | <b>99.3</b> | 0.2          | 0.7         | <b>99.4</b>  | 0.1          | 0.0         | 0.0          | 0.1          | 1.1          |     |  |
|                                    | - | 0.1                    | 0.0          | 0.1         | 0.0         | 0.1          | 0.1          | 0.4          | 0.3          | 0.3         | 0.3         | 0.3          | 0.5          | 0.5          | 0.6          | 0.6         | 0.7          | 0.7         | 0.7          | 0.6          | 0.6         | 0.4          | 0.3          | 0.3          | 0.3 |  |
| AID-seBE-IRE5<br>+Rap Replicate 1  | A | 0.0                    | 0.2          | 0.6         | 0.1         | 0.1          | 0.0          | 0.4          | 0.2          | 2.3         | 0.2         | <b>99.8</b>  | 0.0          | 0.1          | 0.0          | 16.3        | 0.0          | 17.1        | 0.1          | 0.0          | 16.2        | <b>99.9</b>  | <b>99.9</b>  | 0.0          |     |  |
|                                    | C | <b>99.9</b>            | <b>99.8</b>  | <b>99.3</b> | 0.0         | <b>99.8</b>  | 0.0          | 0.0          | 0.0          | 0.0         | <b>99.6</b> | 0.0          | 0.0          | <b>99.7</b>  | 0.0          | 0.2         | 0.0          | 0.0         | <b>99.6</b>  | 0.0          | 0.0         | 0.0          | 0.0          | <b>99.6</b>  |     |  |
|                                    | G | 0.0                    | 0.0          | 0.0         | <b>99.9</b> | 0.0          | 0.0          | <b>98.8</b>  | <b>99.5</b>  | <b>97.5</b> | 0.0         | 0.0          | 0.0          | 0.0          | 0.0          | <b>83.3</b> | 0.0          | <b>82.7</b> | 0.0          | 0.0          | <b>83.6</b> | 0.0          | 0.0          | 0.0          |     |  |
|                                    | T | 0.1                    | 0.0          | 0.0         | 0.0         | 0.0          | <b>99.9</b>  | 0.6          | 0.2          | 0.1         | 0.0         | <b>99.8</b>  | 0.0          | <b>99.8</b>  | 0.1          | <b>99.8</b> | 0.1          | 0.2         | <b>99.8</b>  | 0.1          | 0.0         | 0.0          | 0.0          | 0.3          |     |  |
|                                    | - | 0.0                    | 0.0          | 0.0         | 0.0         | 0.0          | 0.0          | 0.2          | 0.1          | 0.2         | 0.2         | 0.1          | 0.1          | 0.1          | 0.1          | 0.1         | 0.2          | 0.1         | 0.1          | 0.1          | 0.1         | 0.1          | 0.1          | 0.1          | 0.1 |  |
| AID-seBE-IRE5<br>+Rap Replicate 2  | A | 0.0                    | 0.2          | 0.4         | 0.1         | 0.1          | 0.0          | 0.4          | 0.1          | 1.7         | 0.1         | <b>99.9</b>  | 0.0          | 0.1          | 0.0          | 12.7        | 0.0          | 13.3        | 0.1          | 0.0          | 12.5        | <b>99.9</b>  | <b>99.9</b>  | 0.0          |     |  |
|                                    | C | <b>100.0</b>           | <b>99.8</b>  | <b>99.6</b> | 0.0         | <b>99.9</b>  | 0.0          | 0.0          | 0.0          | 0.0         | <b>99.9</b> | 0.0          | 0.0          | <b>99.8</b>  | 0.0          | 0.3         | 0.0          | 0.0         | <b>99.7</b>  | 0.0          | 0.0         | 0.0          | 0.0          | <b>99.9</b>  |     |  |
|                                    | G | 0.0                    | 0.0          | 0.0         | <b>99.9</b> | 0.0          | 0.0          | <b>99.1</b>  | <b>99.7</b>  | <b>98.2</b> | 0.0         | 0.0          | 0.0          | 0.0          | 0.0          | <b>87.0</b> | 0.0          | <b>86.6</b> | 0.0          | 0.0          | <b>87.3</b> | 0.0          | 0.0          | 0.0          |     |  |
|                                    | T | 0.0                    | 0.0          | 0.0         | 0.0         | 0.0          | <b>99.9</b>  | 0.5          | 0.2          | 0.1         | 0.0         | <b>99.9</b>  | 0.0          | <b>99.9</b>  | 0.0          | <b>99.8</b> | 0.0          | 0.1         | <b>99.9</b>  | 0.1          | 0.0         | 0.0          | 0.0          | 0.1          |     |  |
|                                    | - | 0.0                    | 0.0          | 0.0         | 0.0         | 0.0          | 0.0          | 0.0          | 0.0          | 0.0         | 0.0         | 0.0          | 0.0          | 0.0          | 0.0          | 0.1         | 0.1          | 0.1         | 0.1          | 0.1          | 0.1         | 0.1          | 0.0          | 0.0          | 0.0 |  |
| AID-seBE-IRE5<br>+Rap Replicate 3  | A | 0.0                    | 0.0          | 0.0         | 0.1         | 0.0          | 0.0          | 0.5          | 0.2          | 2.5         | 0.0         | <b>99.9</b>  | 0.0          | 0.0          | 0.0          | 15.5        | 0.0          | 16.1        | 0.0          | 0.0          | 15.4        | <b>99.9</b>  | <b>99.9</b>  | 0.0          |     |  |
|                                    | C | <b>99.9</b>            | <b>99.9</b>  | <b>99.9</b> | 0.0         | <b>99.9</b>  | 0.0          | 0.0          | 0.0          | 0.0         | <b>99.9</b> | 0.0          | 0.0          | <b>99.9</b>  | 0.0          | 0.2         | 0.0          | 0.0         | <b>99.8</b>  | 0.0          | 0.0         | 0.0          | 0.0          | <b>99.8</b>  |     |  |
|                                    | G | 0.0                    | 0.0          | 0.0         | <b>99.9</b> | 0.0          | 0.0          | <b>99.4</b>  | <b>99.7</b>  | <b>97.4</b> | 0.0         | 0.0          | 0.0          | 0.0          | 0.0          | <b>84.2</b> | 0.0          | <b>83.8</b> | 0.0          | 0.0          | <b>84.6</b> | 0.0          | 0.0          | 0.0          |     |  |
|                                    | T | 0.0                    | 0.0          | 0.0         | 0.0         | 0.0          | <b>99.9</b>  | 0.1          | 0.0          | 0.0         | 0.0         | <b>99.9</b>  | 0.0          | <b>99.9</b>  | 0.0          | <b>99.9</b> | 0.0          | 0.1         | <b>99.9</b>  | 0.0          | 0.0         | 0.0          | 0.0          | 0.1          |     |  |
|                                    | - | 0.0                    | 0.0          | 0.0         | 0.0         | 0.0          | 0.0          | 0.1          | 0.1          | 0.1         | 0.0         | 0.1          | 0.1          | 0.1          | 0.1          | 0.1         | 0.1          | 0.1         | 0.0          | 0.0          | 0.0         | 0.0          | 0.0          | 0.0          | 0.0 |  |
| AID-seBE-IRE5<br>NoRap Replicate 1 | A | 0.0                    | 0.1          | 0.4         | 0.0         | 0.1          | 0.0          | 0.0          | 0.0          | 0.1         | 0.1         | <b>100.0</b> | 0.0          | 0.0          | 0.0          | 0.4         | 0.0          | 0.4         | 0.0          | 0.0          | 0.5         | <b>100.0</b> | <b>100.0</b> | 0.0          |     |  |
|                                    | C | <b>100.0</b>           | <b>99.9</b>  | <b>99.6</b> | 0.0         | <b>99.9</b>  | 0.0          | 0.0          | 0.0          | 0.0         | <b>99.9</b> | 0.0          | 0.0          | <b>99.9</b>  | 0.0          | 0.0         | 0.0          | <b>99.9</b> | 0.0          | 0.0          | 0.0         | 0.0          | 0.0          | <b>99.9</b>  |     |  |
|                                    | G | 0.0                    | 0.0          | 0.0         | <b>99.9</b> | 0.0          | 0.0          | <b>99.6</b>  | <b>99.9</b>  | <b>99.8</b> | 0.0         | 0.0          | 0.0          | 0.0          | 0.0          | <b>99.6</b> | 0.0          | <b>99.6</b> | 0.0          | 0.0          | <b>99.4</b> | 0.0          | 0.0          | 0.0          |     |  |
|                                    | T | 0.0                    | 0.0          | 0.0         | 0.0         | 0.0          | <b>100.0</b> | 0.4          | 0.1          | 0.1         | 0.0         | 0.0          | <b>100.0</b> | 0.0          | <b>100.0</b> | 0.0         | <b>99.9</b>  | 0.0         | <b>100.0</b> | 0.1          | 0.0         | 0.0          | 0.0          | 0.0          |     |  |
|                                    | - | 0.0                    | 0.0          | 0.0         | 0.0         | 0.0          | 0.0          | 0.0          | 0.0          | 0.0         | 0.0         | 0.0          | 0.0          | 0.0          | 0.0          | 0.0         | 0.0          | 0.0         | 0.0          | 0.0          | 0.0         | 0.0          | 0.0          | 0.0          | 0.0 |  |
| AID-seBE-IRE5<br>NoRap Replicate 2 | A | 0.0                    | 0.2          | 0.7         | 0.0         | 0.2          | 0.0          | 0.0          | 0.0          | 0.2         | 0.2         | <b>100.0</b> | 0.0          | 0.1          | 0.0          | 0.3         | 0.0          | 0.3         | 0.1          | 0.0          | 0.3         | <b>100.0</b> | <b>100.0</b> | 0.1          |     |  |
|                                    | C | <b>100.0</b>           | <b>99.8</b>  | <b>99.2</b> | 0.0         | <b>99.8</b>  | 0.0          | 0.0          | 0.0          | 0.0         | <b>99.7</b> | 0.0          | 0.0          | <b>99.9</b>  | 0.0          | 0.0         | 0.0          | <b>99.9</b> | 0.0          | 0.0          | 0.0         | 0.0          | 0.0          | <b>99.9</b>  |     |  |
|                                    | G | 0.0                    | 0.0          | 0.0         | <b>99.9</b> | 0.0          | 0.0          | <b>99.3</b>  | <b>99.8</b>  | <b>99.7</b> | 0.0         | 0.0          | 0.0          | 0.0          | 0.0          | <b>99.7</b> | 0.0          | <b>99.6</b> | 0.0          | 0.0          | <b>99.5</b> | 0.0          | 0.0          | 0.0          |     |  |
|                                    | T | 0.0                    | 0.0          | 0.0         | 0.1         | 0.0          | <b>100.0</b> | 0.6          | 0.2          | 0.1         | 0.0         | 0.0          | <b>100.0</b> | 0.0          | <b>100.0</b> | 0.0         | <b>100.0</b> | 0.0         | <b>100.0</b> | 0.2          | 0.0         | 0.0          | 0.0          | 0.0          |     |  |
|                                    | - | 0.0                    | 0.0          | 0.0         | 0.0         | 0.0          | 0.0          | 0.0          | 0.0          | 0.0         | 0.0         | 0.0          | 0.0          | 0.0          | 0.0          | 0.0         | 0.0          | 0.0         | 0.0          | 0.0          | 0.0         | 0.0          | 0.0          | 0.0          | 0.0 |  |
| AID-seBE-IRE5<br>NoRap Replicate 3 | A | 0.0                    | 0.0          | 0.0         | 0.1         | 0.0          | 0.0          | 0.0          | 0.0          | 0.1         | 0.0         | <b>99.9</b>  | 0.0          | 0.0          | 0.0          | 0.3         | 0.0          | 0.4         | 0.0          | 0.0          | 0.4         | <b>100.0</b> | <b>100.0</b> | 0.0          |     |  |
|                                    | C | <b>100.0</b>           | <b>100.0</b> | <b>99.9</b> | 0.0         | <b>100.0</b> | 0.0          | 0.0          | 0.0          | 0.0         | <b>99.9</b> | 0.0          | 0.0          | <b>100.0</b> | 0.0          | 0.0         | 0.0          | <b>99.9</b> | 0.0          | 0.0          | 0.0         | 0.0          | 0.0          | <b>99.9</b>  |     |  |
|                                    | G | 0.0                    | 0.0          | 0.0         | <b>99.9</b> | 0.0          | 0.0          | <b>99.9</b>  | <b>100.0</b> | <b>99.8</b> | 0.0         | 0.0          | 0.0          | 0.0          | 0.0          | <b>99.7</b> | 0.0          | <b>99.5</b> | 0.0          | 0.0          | <b>99.6</b> | 0.0          | 0.0          | 0.0          |     |  |
|                                    | T | 0.0                    | 0.0          | 0.0         | 0.0         | 0.0          | <b>100.0</b> | 0.0          | 0.0          | 0.0         | 0.0         | 0.0          | <b>100.0</b> | 0.0          | <b>100.0</b> | 0.0         | <b>99.9</b>  | 0.0         | <b>100.0</b> | 0.0          | 0.0         | 0.0          | 0.0          | 0.0          |     |  |
|                                    | - | 0.0                    | 0.0          | 0.0         | 0.0         | 0.0          | 0.0          | 0.0          | 0.0          | 0.0         | 0.0         | 0.0          | 0.0          | 0.0          | 0.0          | 0.0         | 0.0          | 0.0         | 0.0          | 0.0          | 0.0         | 0.0          | 0.0          | 0.0          | 0.0 |  |



# Supplementary Figure 3

**b** **CDA Q104\***

|           |   | C102  |       |      | R103 |      |       | Q104 |       |       | V105  |       |       | M106 |       |       | R107  |       |       | E108  |       |       |
|-----------|---|-------|-------|------|------|------|-------|------|-------|-------|-------|-------|-------|------|-------|-------|-------|-------|-------|-------|-------|-------|
|           |   | C     | T     | G    | C    | A    | G     | C    | A     | A     | G     | T     | C     | A    | T     | G     | A     | G     | A     | G     | A     | G     |
| untreated | A | 0.0   | 0.0   | 0.1  | 0.0  | 99.9 | 0.0   | 0.1  | 0.0   | 100.0 | 100.0 | 0.0   | 0.0   | 0.0  | 100.0 | 0.0   | 0.0   | 100.0 | 0.0   | 100.0 | 0.0   | 100.0 |
|           | C | 100.0 | 0.0   | 0.0  | 99.9 | 0.0  | 0.0   | 0.0  | 100.0 | 0.0   | 0.0   | 0.0   | 100.0 | 0.0  | 0.0   | 0.0   | 0.0   | 0.0   | 0.0   | 0.0   | 0.0   | 0.0   |
|           | G | 0.0   | 0.0   | 99.9 | 0.0  | 0.1  | 100.0 | 99.9 | 0.0   | 0.0   | 0.0   | 100.0 | 0.0   | 0.0  | 0.0   | 100.0 | 0.0   | 0.0   | 100.0 | 0.0   | 100.0 | 0.0   |
|           | T | 0.0   | 100.0 | 0.0  | 0.1  | 0.0  | 0.0   | 0.0  | 0.0   | 0.0   | 0.0   | 0.0   | 100.0 | 0.0  | 0.0   | 0.0   | 100.0 | 0.0   | 0.0   | 0.0   | 0.0   | 100.0 |
|           | - | 0.0   | 0.0   | 0.0  | 0.0  | 0.0  | 0.0   | 0.0  | 0.0   | 0.0   | 0.0   | 0.0   | 0.0   | 0.0  | 0.0   | 0.0   | 0.0   | 0.0   | 0.0   | 0.0   | 0.0   | 0.0   |

  

|                            |   | 1    |      |      | 5    |      |      | 10   |      |      | 15   |     |      | 20  |      |      | PAM |      |     |       |     |       |
|----------------------------|---|------|------|------|------|------|------|------|------|------|------|-----|------|-----|------|------|-----|------|-----|-------|-----|-------|
|                            |   | C    | T    | G    | C    | A    | G    | C    | A    | A    | G    | T   | C    | A   | T    | G    | A   | G    | A   | G     | A   | G     |
| AID-seB4max<br>Replicate 1 | A | 0.4  | 0.0  | 1.0  | 0.5  | 99.0 | 0.5  | 0.5  | 0.3  | 99.3 | 99.3 | 0.1 | 0.1  | 0.1 | 99.6 | 0.0  | 0.0 | 99.9 | 0.1 | 100.0 | 0.0 | 100.0 |
|                            | C | 88.0 | 0.0  | 0.0  | 65.8 | 0.0  | 0.0  | 0.0  | 66.3 | 0.0  | 0.0  | 0.0 | 97.8 | 0.1 | 0.0  | 0.0  | 0.0 | 0.0  | 0.0 | 0.0   | 0.0 | 0.0   |
|                            | G | 0.1  | 0.0  | 98.0 | 0.2  | 0.0  | 98.2 | 98.3 | 1.0  | 0.0  | 0.0  | 0.0 | 99.4 | 0.0 | 0.0  | 99.4 | 0.0 | 99.6 | 0.0 | 99.4  | 0.0 | 99.7  |
|                            | T | 10.3 | 99.1 | 0.1  | 32.5 | 0.0  | 0.3  | 0.0  | 31.1 | 0.0  | 0.0  | 0.0 | 99.6 | 1.8 | 0.0  | 99.8 | 0.4 | 0.0  | 0.3 | 0.0   | 0.5 | 0.0   |
|                            | - | 1.2  | 0.8  | 0.8  | 1.0  | 1.0  | 1.0  | 1.1  | 1.3  | 0.7  | 0.7  | 0.5 | 0.4  | 0.2 | 0.2  | 0.2  | 0.1 | 0.1  | 0.1 | 0.0   | 0.0 | 0.0   |

  

|                            |   | 1    |      |      | 5    |      |      | 10   |      |      | 15   |     |      | 20  |      |      | PAM  |      |      |      |      |       |
|----------------------------|---|------|------|------|------|------|------|------|------|------|------|-----|------|-----|------|------|------|------|------|------|------|-------|
|                            |   | C    | T    | G    | C    | A    | G    | C    | A    | A    | G    | T   | C    | A   | T    | G    | A    | G    | A    | G    | A    | G     |
| AID-seB4max<br>Replicate 2 | A | 0.3  | 0.0  | 0.6  | 0.4  | 99.0 | 0.4  | 0.5  | 0.4  | 99.1 | 99.1 | 0.0 | 0.0  | 0.2 | 99.6 | 0.0  | 0.0  | 99.8 | 0.0  | 99.9 | 0.0  | 100.0 |
|                            | C | 89.6 | 0.0  | 0.1  | 63.7 | 0.0  | 0.0  | 0.0  | 63.3 | 0.0  | 0.0  | 0.0 | 98.1 | 0.0 | 0.0  | 0.0  | 0.0  | 0.0  | 0.0  | 0.0  | 0.0  | 0.0   |
|                            | G | 0.0  | 0.0  | 98.3 | 0.1  | 0.0  | 98.0 | 98.3 | 1.7  | 0.0  | 0.0  | 0.0 | 99.1 | 0.0 | 0.1  | 0.0  | 99.4 | 0.0  | 99.7 | 0.0  | 98.8 | 0.0   |
|                            | T | 8.5  | 99.1 | 0.1  | 34.8 | 0.0  | 0.6  | 0.1  | 33.4 | 0.0  | 0.0  | 0.1 | 99.4 | 1.3 | 0.0  | 99.7 | 0.4  | 0.0  | 0.2  | 0.0  | 1.1  | 0.0   |
|                            | - | 1.5  | 0.8  | 0.9  | 1.0  | 0.9  | 1.0  | 1.1  | 1.2  | 0.9  | 0.9  | 0.8 | 0.5  | 0.4 | 0.2  | 0.2  | 0.1  | 0.1  | 0.1  | 0.0  | 0.0  | 0.0   |

  

|                            |   | 1    |      |      | 5    |      |      | 10   |      |      | 15   |     |      | 20  |      |      | PAM  |      |      |      |      |       |
|----------------------------|---|------|------|------|------|------|------|------|------|------|------|-----|------|-----|------|------|------|------|------|------|------|-------|
|                            |   | C    | T    | G    | C    | A    | G    | C    | A    | A    | G    | T   | C    | A   | T    | G    | A    | G    | A    | G    | A    | G     |
| AID-seB4max<br>Replicate 3 | A | 0.3  | 0.1  | 0.8  | 0.3  | 98.7 | 0.6  | 0.6  | 0.3  | 98.9 | 98.9 | 0.1 | 0.0  | 0.2 | 99.4 | 0.0  | 0.1  | 99.8 | 0.1  | 99.9 | 0.0  | 100.0 |
|                            | C | 85.5 | 0.0  | 0.0  | 55.5 | 0.0  | 0.0  | 0.0  | 55.5 | 0.0  | 0.0  | 0.0 | 97.3 | 0.0 | 0.0  | 0.0  | 0.0  | 0.0  | 0.0  | 0.0  | 0.0  | 0.0   |
|                            | G | 0.1  | 0.0  | 98.0 | 0.2  | 0.1  | 97.5 | 97.8 | 1.5  | 0.0  | 0.0  | 0.0 | 98.9 | 0.0 | 0.0  | 0.0  | 99.3 | 0.0  | 99.5 | 0.0  | 99.1 | 0.0   |
|                            | T | 12.5 | 98.9 | 0.2  | 42.8 | 0.0  | 0.6  | 0.2  | 41.1 | 0.0  | 0.0  | 0.1 | 99.3 | 1.9 | 0.0  | 99.5 | 0.3  | 0.0  | 0.4  | 0.0  | 0.9  | 0.0   |
|                            | - | 1.6  | 1.0  | 1.0  | 1.2  | 1.1  | 1.3  | 1.3  | 1.6  | 1.1  | 1.0  | 0.9 | 0.7  | 0.6 | 0.6  | 0.5  | 0.4  | 0.2  | 0.1  | 0.1  | 0.0  | 0.0   |

  

|                                   |   | 1    |      |      | 5    |      |      | 10   |      |      | 15   |     |      | 20  |      |       | PAM  |      |      |       |      |       |
|-----------------------------------|---|------|------|------|------|------|------|------|------|------|------|-----|------|-----|------|-------|------|------|------|-------|------|-------|
|                                   |   | C    | T    | G    | C    | A    | G    | C    | A    | A    | G    | T   | C    | A   | T    | G     | A    | G    | A    | G     | A    | G     |
| AID-seBE-IRE5<br>+Rap Replicate 1 | A | 0.1  | 0.0  | 0.1  | 0.0  | 99.9 | 0.1  | 0.1  | 0.1  | 99.9 | 99.9 | 0.0 | 0.0  | 0.1 | 99.9 | 0.0   | 0.0  | 99.9 | 0.0  | 100.0 | 0.0  | 100.0 |
|                                   | C | 92.6 | 0.0  | 0.0  | 72.0 | 0.0  | 0.0  | 0.0  | 72.2 | 0.0  | 0.0  | 0.0 | 99.6 | 0.0 | 0.0  | 0.0   | 0.0  | 0.0  | 0.0  | 0.0   | 0.0  | 0.0   |
|                                   | G | 0.0  | 0.0  | 99.7 | 0.0  | 0.0  | 99.6 | 99.7 | 0.3  | 0.0  | 0.0  | 0.0 | 99.9 | 0.0 | 0.0  | 0.0   | 99.8 | 0.0  | 99.8 | 0.0   | 99.7 | 99.9  |
|                                   | T | 7.1  | 99.9 | 0.0  | 27.9 | 0.0  | 0.3  | 0.1  | 27.3 | 0.0  | 0.0  | 0.0 | 99.9 | 0.3 | 0.0  | 100.0 | 0.2  | 0.0  | 0.2  | 0.0   | 0.3  | 0.1   |
|                                   | - | 0.2  | 0.1  | 0.1  | 0.1  | 0.1  | 0.1  | 0.1  | 0.1  | 0.1  | 0.0  | 0.0 | 0.0  | 0.0 | 0.0  | 0.0   | 0.0  | 0.0  | 0.0  | 0.0   | 0.0  | 0.0   |

  

|                                   |   | 1    |      |      | 5    |      |      | 10   |      |      | 15   |     |       | 20  |      |       | PAM  |       |      |       |      |       |
|-----------------------------------|---|------|------|------|------|------|------|------|------|------|------|-----|-------|-----|------|-------|------|-------|------|-------|------|-------|
|                                   |   | C    | T    | G    | C    | A    | G    | C    | A    | A    | G    | T   | C     | A   | T    | G     | A    | G     | A    | G     | A    | G     |
| AID-seBE-IRE5<br>+Rap Replicate 2 | A | 0.1  | 0.0  | 0.0  | 0.1  | 99.8 | 0.0  | 0.1  | 0.1  | 99.8 | 99.9 | 0.0 | 0.0   | 0.0 | 99.9 | 0.0   | 0.0  | 100.0 | 0.0  | 100.0 | 0.0  | 100.0 |
|                                   | C | 94.6 | 0.0  | 0.0  | 76.0 | 0.0  | 0.0  | 0.0  | 76.4 | 0.0  | 0.0  | 0.0 | 99.8  | 0.0 | 0.0  | 0.0   | 0.0  | 0.0   | 0.0  | 0.0   | 0.0  | 0.0   |
|                                   | G | 0.0  | 0.0  | 99.8 | 0.0  | 0.0  | 99.5 | 99.7 | 0.4  | 0.0  | 0.0  | 0.0 | 99.9  | 0.0 | 0.0  | 0.0   | 99.7 | 0.0   | 99.9 | 0.0   | 99.5 | 99.8  |
|                                   | T | 5.0  | 99.8 | 0.1  | 23.8 | 0.0  | 0.3  | 0.1  | 22.9 | 0.0  | 0.0  | 0.0 | 100.0 | 0.2 | 0.0  | 100.0 | 0.2  | 0.0   | 0.1  | 0.0   | 0.4  | 0.2   |
|                                   | - | 0.2  | 0.1  | 0.1  | 0.1  | 0.1  | 0.1  | 0.1  | 0.2  | 0.1  | 0.1  | 0.1 | 0.1   | 0.0 | 0.0  | 0.0   | 0.0  | 0.0   | 0.0  | 0.0   | 0.0  | 0.0   |

  

|                                   |   | 1    |      |      | 5    |      |      | 10   |      |       | 15   |     |       | 20  |      |       | PAM  |       |      |      |      |       |
|-----------------------------------|---|------|------|------|------|------|------|------|------|-------|------|-----|-------|-----|------|-------|------|-------|------|------|------|-------|
|                                   |   | C    | T    | G    | C    | A    | G    | C    | A    | A     | G    | T   | C     | A   | T    | G     | A    | G     | A    | G    | A    | G     |
| AID-seBE-IRE5<br>+Rap Replicate 3 | A | 0.2  | 0.0  | 0.1  | 0.1  | 99.9 | 0.0  | 0.0  | 0.1  | 100.0 | 99.9 | 0.0 | 0.0   | 0.1 | 99.9 | 0.0   | 0.0  | 100.0 | 0.0  | 99.9 | 0.0  | 100.0 |
|                                   | C | 93.5 | 0.0  | 0.0  | 73.1 | 0.0  | 0.0  | 0.0  | 73.2 | 0.0   | 0.0  | 0.0 | 99.7  | 0.0 | 0.0  | 0.0   | 0.0  | 0.0   | 0.0  | 0.0  | 0.0  | 0.0   |
|                                   | G | 0.0  | 0.0  | 99.8 | 0.0  | 0.0  | 99.5 | 99.8 | 0.3  | 0.0   | 0.0  | 0.0 | 99.8  | 0.0 | 0.0  | 0.0   | 99.7 | 0.0   | 99.6 | 0.0  | 99.2 | 99.7  |
|                                   | T | 6.1  | 99.9 | 0.1  | 26.7 | 0.0  | 0.4  | 0.1  | 26.3 | 0.0   | 0.0  | 0.1 | 100.0 | 0.2 | 0.0  | 100.0 | 0.3  | 0.0   | 0.4  | 0.0  | 0.8  | 0.3   |
|                                   | - | 0.2  | 0.1  | 0.1  | 0.1  | 0.1  | 0.1  | 0.1  | 0.1  | 0.1   | 0.0  | 0.0 | 0.0   | 0.0 | 0.0  | 0.0   | 0.0  | 0.0   | 0.0  | 0.0  | 0.0  | 0.0   |

  

|                                    |   | 1    |      |      | 5    |      |      | 10   |      |       | 15    |     |       | 20  |       |      | PAM  |       |      |       |      |      |
|------------------------------------|---|------|------|------|------|------|------|------|------|-------|-------|-----|-------|-----|-------|------|------|-------|------|-------|------|------|
|                                    |   | C    | T    | G    | C    | A    | G    | C    | A    | A     | G     | T   | C     | A   | T     | G    | A    | G     | A    | G     | A    | G    |
| AID-seBE-IRE5<br>NoRap Replicate 1 | A | 0.1  | 0.0  | 0.0  | 0.0  | 99.9 | 0.0  | 0.0  | 0.0  | 100.0 | 100.0 | 0.0 | 0.0   | 0.0 | 100.0 | 0.0  | 0.0  | 100.0 | 0.0  | 100.0 | 0.0  | 99.9 |
|                                    | C | 99.7 | 0.0  | 0.0  | 99.1 | 0.0  | 0.0  | 0.0  | 99.2 | 0.0   | 0.0   | 0.0 | 100.0 | 0.0 | 0.1   | 0.0  | 0.0  | 0.0   | 0.0  | 0.0   | 0.0  | 0.0  |
|                                    | G | 0.0  | 0.0  | 99.9 | 0.0  | 0.1  | 99.8 | 99.9 | 0.0  | 0.0   | 0.0   | 0.0 | 99.9  | 0.0 | 0.0   | 0.0  | 99.9 | 0.0   | 99.9 | 0.0   | 99.7 | 99.9 |
|                                    | T | 0.2  | 99.9 | 0.0  | 0.8  | 0.0  | 0.1  | 0.0  | 0.8  | 0.0   | 0.0   | 0.1 | 100.0 | 0.0 | 0.0   | 99.9 | 0.1  | 0.0   | 0.1  | 0.0   | 0.3  | 0.1  |
|                                    | - | 0.0  | 0.0  | 0.0  | 0.0  | 0.0  | 0.0  | 0.0  | 0.0  | 0.0   | 0.0   | 0.0 | 0.0   | 0.0 | 0.0   | 0.0  | 0.0  | 0.0   | 0.0  | 0.0   | 0.0  | 0.0  |

  

|                                    |   | 1    |      |      | 5    |       |      | 10   |      |       | 15   |     |       | 20  |       |       | PAM  |       |      |      |      |       |
|------------------------------------|---|------|------|------|------|-------|------|------|------|-------|------|-----|-------|-----|-------|-------|------|-------|------|------|------|-------|
|                                    |   | C    | T    | G    | C    | A     | G    | C    | A    | A     | G    | T   | C     | A   | T     | G     | A    | G     | A    | G    | A    | G     |
| AID-seBE-IRE5<br>NoRap Replicate 2 | A | 0.1  | 0.0  | 0.1  | 0.1  | 100.0 | 0.0  | 0.1  | 0.1  | 100.0 | 99.9 | 0.0 | 0.0   | 0.0 | 100.0 | 0.0   | 0.0  | 100.0 | 0.0  | 99.9 | 0.0  | 100.0 |
|                                    | C | 99.8 | 0.1  | 0.0  | 99.5 | 0.0   | 0.0  | 0.0  | 99.5 | 0.0   | 0.0  | 0.0 | 100.0 | 0.0 | 0.0   | 0.0   | 0.0  | 0.0   | 0.0  | 0.0  | 0.0  | 0.0   |
|                                    | G | 0.0  | 0.0  | 99.9 | 0.0  | 0.0   | 99.8 | 99.9 | 0.0  | 0.0   | 0.0  | 0.0 | 99.9  | 0.0 | 0.0   | 0.0   | 99.8 | 0.0   | 99.7 | 0.0  | 99.4 | 99.8  |
|                                    | T | 0.1  | 99.9 | 0.0  | 0.4  | 0.0   | 0.1  | 0.1  | 0.4  | 0.0   | 0.0  | 0.1 | 99.9  | 0.0 | 0.0   | 100.0 | 0.2  | 0.0   | 0.3  | 0.0  | 0.6  | 0.2   |
|                                    | - | 0.0  | 0.0  | 0.0  | 0.0  | 0.0   | 0.0  | 0.0  | 0.0  | 0.0   | 0.0  | 0.0 | 0.0   | 0.0 | 0.0   | 0.0   | 0.0  | 0.0   | 0.0  | 0.0  | 0.0  | 0.0   |

  

|                                    |   | 1    |       |       | 5    |       |      | 10   |      |       | 15    |     |       | 20  |       |       | PAM  |       |      |       |      |       |
|------------------------------------|---|------|-------|-------|------|-------|------|------|------|-------|-------|-----|-------|-----|-------|-------|------|-------|------|-------|------|-------|
|                                    |   | C    | T     | G     | C    | A     | G    | C    | A    | A     | G     | T   | C     | A   | T     | G     | A    | G     | A    | G     | A    | G     |
| AID-seBE-IRE5<br>NoRap Replicate 3 | A | 0.1  | 0.0   | 0.0   | 0.0  | 100.0 | 0.0  | 0.0  | 0.1  | 100.0 | 100.0 | 0.0 | 0.0   | 0.1 | 100.0 | 0.0   | 0.0  | 100.0 | 0.0  | 100.0 | 0.0  | 100.0 |
|                                    | C | 99.7 | 0.0   | 0.0   | 99.3 | 0.0   | 0.0  | 0.0  | 99.2 | 0.0   | 0.0   | 0.0 | 99.9  | 0.0 | 0.0   | 0.0   | 0.0  | 0.0   | 0.0  | 0.0   | 0.0  | 0.0   |
|                                    | G | 0.0  | 0.0   | 100.0 | 0.0  | 0.0   | 99.7 | 99.9 | 0.0  | 0.0   | 0.0   | 0.0 | 99.9  | 0.0 | 0.0   | 0.0   | 99.6 | 0.0   | 99.7 | 0.0   | 99.3 | 99.9  |
|                                    | T | 0.2  | 100.0 | 0.0   | 0.6  | 0.0   | 0.3  | 0.1  | 0.7  | 0.0   | 0.0   | 0.1 | 100.0 | 0.0 | 0.0   | 100.0 | 0.3  | 0.0   | 0.3  | 0.0   | 0.7  | 0.3   |
|                                    | - | 0.0  | 0.0   | 0.0   | 0.0  | 0.0   | 0.0  | 0.0  | 0.0  | 0.0   | 0.0   | 0.0 | 0.0   | 0.0 | 0.0   | 0.0   | 0.0  | 0.0   | 0.0  | 0.0   | 0.0  | 0.0   |

### Supplementary Figure 3

| <b>c</b>                                 |     | <b>IDH2 R172K</b> |       |       |      |       |       |      |       |       |       |       |       |      |      |      |       |      |      |      |       |      |      |      |     |     |      |     |      |     |
|------------------------------------------|-----|-------------------|-------|-------|------|-------|-------|------|-------|-------|-------|-------|-------|------|------|------|-------|------|------|------|-------|------|------|------|-----|-----|------|-----|------|-----|
| untreated                                |     | P167              |       |       | I168 |       |       | T169 |       |       | I170  |       |       | G171 |      |      | R172  |      |      | H173 |       |      |      |      |     |     |      |     |      |     |
|                                          |     | C                 | C     | C     | A    | T     | C     | A    | C     | C     | A     | T     | T     | G    | G    | C    | A     | G    | G    | C    | A     | C    | G    | C    |     |     |      |     |      |     |
|                                          | A   | 0.0               | 0.0   | 0.0   | 99.9 | 0.0   | 0.0   | 99.9 | 0.0   | 0.0   | 100.0 | 0.0   | 0.0   | 0.2  | 0.2  | 0.0  | 99.9  | 0.5  | 0.5  | 0.0  | 100.0 | 0.0  | 0.0  | 0.1  | 0.0 | 0.0 | 0.0  | 0.0 | 0.0  |     |
|                                          | C   | 99.9              | 100.0 | 100.0 | 0.0  | 0.0   | 100.0 | 0.0  | 99.9  | 100.0 | 0.0   | 0.0   | 0.0   | 0.0  | 0.0  | 99.9 | 0.0   | 0.0  | 0.0  | 0.0  | 100.0 | 0.0  | 99.9 | 0.0  | 0.0 | 0.0 | 99.9 | 0.0 | 99.9 |     |
|                                          | G   | 0.0               | 0.0   | 0.0   | 0.0  | 0.0   | 0.0   | 0.0  | 0.0   | 0.0   | 0.0   | 0.0   | 0.0   | 99.8 | 99.8 | 0.0  | 0.1   | 99.4 | 99.5 | 0.0  | 0.0   | 0.0  | 0.0  | 0.0  | 0.0 | 0.0 | 0.0  | 0.0 | 99.9 | 0.0 |
|                                          | T   | 0.1               | 0.0   | 0.0   | 0.0  | 100.0 | 0.0   | 0.0  | 0.0   | 0.0   | 0.0   | 0.0   | 100.0 | 99.9 | 0.0  | 0.0  | 0.0   | 0.0  | 0.0  | 0.0  | 0.0   | 0.0  | 0.0  | 0.0  | 0.0 | 0.0 | 0.0  | 0.0 | 0.0  | 0.0 |
| -                                        | 0.0 | 0.0               | 0.0   | 0.0   | 0.0  | 0.0   | 0.0   | 0.0  | 0.0   | 0.0   | 0.0   | 0.0   | 0.0   | 0.0  | 0.0  | 0.0  | 0.0   | 0.0  | 0.0  | 0.0  | 0.0   | 0.0  | 0.0  | 0.0  | 0.0 | 0.0 | 0.0  | 0.0 | 0.0  |     |
| AID-seB4max<br>Replicate 1               |     | PAM               |       |       | 20   |       |       | 15   |       |       | 10    |       |       | 5    |      |      | 1     |      |      |      |       |      |      |      |     |     |      |     |      |     |
|                                          |     | C                 | C     | C     | A    | T     | C     | A    | C     | C     | A     | T     | T     | G    | G    | C    | A     | G    | G    | C    | A     | C    | G    | C    |     |     |      |     |      |     |
|                                          | A   | 0.1               | 0.2   | 0.4   | 99.9 | 0.0   | 0.1   | 99.7 | 0.1   | 0.2   | 99.6  | 0.0   | 0.0   | 10.0 | 31.7 | 0.2  | 99.2  | 31.4 | 32.2 | 0.1  | 99.4  | 0.1  | 30.2 | 0.1  |     |     |      |     |      |     |
|                                          | C   | 99.6              | 99.7  | 99.5  | 0.0  | 0.0   | 99.6  | 0.0  | 99.5  | 99.4  | 0.0   | 0.0   | 0.0   | 0.0  | 0.1  | 98.8 | 0.0   | 0.0  | 0.1  | 98.9 | 0.0   | 99.0 | 0.0  | 98.8 |     |     |      |     |      |     |
|                                          | G   | 0.0               | 0.0   | 0.0   | 0.0  | 0.0   | 0.0   | 0.0  | 0.0   | 0.0   | 0.0   | 0.0   | 0.0   | 89.4 | 67.2 | 0.0  | 0.0   | 67.5 | 66.7 | 0.0  | 0.0   | 0.0  | 0.0  | 68.9 |     |     |      |     |      |     |
|                                          | T   | 0.2               | 0.0   | 0.0   | 0.0  | 99.9  | 0.1   | 0.0  | 0.1   | 0.1   | 0.0   | 99.5  | 99.4  | 0.1  | 0.3  | 0.3  | 0.0   | 0.3  | 0.2  | 0.0  | 0.3   | 0.3  | 0.1  | 0.4  |     |     |      |     |      |     |
| -                                        | 0.0 | 0.1               | 0.1   | 0.1   | 0.1  | 0.2   | 0.3   | 0.1  | 0.4   | 0.4   | 0.5   | 0.5   | 0.5   | 0.7  | 0.7  | 0.7  | 0.7   | 0.8  | 0.7  | 0.6  | 0.6   | 0.7  | 0.7  |      |     |     |      |     |      |     |
| AID-seB4max<br>Replicate 2               |     | C                 | C     | C     | A    | T     | C     | A    | C     | C     | A     | T     | T     | G    | G    | C    | A     | G    | G    | C    | A     | C    | G    | C    |     |     |      |     |      |     |
|                                          | A   | 0.0               | 0.0   | 0.0   | 99.9 | 0.0   | 0.0   | 99.7 | 0.0   | 0.0   | 99.7  | 0.0   | 0.0   | 10.1 | 38.0 | 0.0  | 99.3  | 37.7 | 38.3 | 0.1  | 99.3  | 0.0  | 35.6 | 0.1  |     |     |      |     |      |     |
|                                          | C   | 99.7              | 100.0 | 99.9  | 0.0  | 0.0   | 99.8  | 0.1  | 99.7  | 99.7  | 0.0   | 0.0   | 0.0   | 0.0  | 0.3  | 99.1 | 0.0   | 0.1  | 0.3  | 98.7 | 0.1   | 99.0 | 0.0  | 98.7 |     |     |      |     |      |     |
|                                          | G   | 0.1               | 0.0   | 0.0   | 0.0  | 0.0   | 0.0   | 0.0  | 0.0   | 0.0   | 0.0   | 0.0   | 0.0   | 89.4 | 60.7 | 0.0  | 0.0   | 61.4 | 60.4 | 0.0  | 0.0   | 0.0  | 0.0  | 63.7 |     |     |      |     |      |     |
|                                          | T   | 0.2               | 0.0   | 0.0   | 0.0  | 100.0 | 0.1   | 0.0  | 0.1   | 0.1   | 0.0   | 99.6  | 99.5  | 0.0  | 0.3  | 0.2  | 0.0   | 0.1  | 0.2  | 0.6  | 0.1   | 0.2  | 0.4  | 0.5  |     |     |      |     |      |     |
|                                          | -   | 0.0               | 0.0   | 0.0   | 0.0  | 0.0   | 0.1   | 0.2  | 0.2   | 0.2   | 0.2   | 0.4   | 0.5   | 0.5  | 0.6  | 0.6  | 0.6   | 0.7  | 0.7  | 0.6  | 0.6   | 0.6  | 0.7  | 0.7  |     |     |      |     |      |     |
| AID-seB4max<br>Replicate 3               |     | C                 | C     | C     | A    | T     | C     | A    | C     | C     | A     | T     | T     | G    | G    | C    | A     | G    | G    | C    | A     | C    | G    | C    |     |     |      |     |      |     |
|                                          | A   | 0.0               | 0.0   | 0.1   | 99.9 | 0.0   | 0.0   | 99.8 | 0.0   | 0.0   | 99.7  | 0.0   | 0.0   | 8.2  | 30.0 | 0.1  | 99.4  | 29.7 | 30.3 | 0.1  | 99.5  | 0.0  | 28.2 | 0.0  |     |     |      |     |      |     |
|                                          | C   | 99.7              | 99.9  | 99.9  | 0.1  | 0.0   | 99.9  | 0.1  | 99.7  | 99.7  | 0.0   | 0.0   | 0.0   | 0.0  | 0.3  | 99.3 | 0.0   | 0.0  | 0.2  | 99.2 | 0.0   | 99.3 | 0.0  | 99.1 |     |     |      |     |      |     |
|                                          | G   | 0.0               | 0.0   | 0.0   | 0.0  | 0.0   | 0.0   | 0.0  | 0.0   | 0.0   | 0.0   | 0.0   | 0.0   | 91.3 | 69.0 | 0.0  | 0.0   | 69.6 | 68.8 | 0.0  | 0.0   | 0.0  | 0.0  | 71.3 |     |     |      |     |      |     |
|                                          | T   | 0.2               | 0.0   | 0.0   | 0.0  | 100.0 | 0.0   | 0.0  | 0.1   | 0.1   | 0.0   | 99.6  | 99.5  | 0.0  | 0.2  | 0.2  | 0.0   | 0.1  | 0.2  | 0.3  | 0.0   | 0.3  | 0.0  | 0.4  |     |     |      |     |      |     |
|                                          | -   | 0.0               | 0.0   | 0.0   | 0.0  | 0.0   | 0.1   | 0.2  | 0.2   | 0.3   | 0.3   | 0.4   | 0.5   | 0.4  | 0.5  | 0.5  | 0.5   | 0.5  | 0.6  | 0.5  | 0.5   | 0.4  | 0.4  | 0.4  |     |     |      |     |      |     |
| AID-seB4max<br>+ Rap Replicate 1         |     | PAM               |       |       | 20   |       |       | 15   |       |       | 10    |       |       | 5    |      |      | 1     |      |      |      |       |      |      |      |     |     |      |     |      |     |
|                                          |     | C                 | C     | C     | A    | T     | C     | A    | C     | C     | A     | T     | T     | G    | G    | C    | A     | G    | G    | C    | A     | C    | G    | C    |     |     |      |     |      |     |
|                                          | A   | 0.1               | 0.2   | 0.4   | 99.9 | 0.0   | 0.0   | 99.9 | 0.1   | 0.2   | 100.0 | 0.0   | 0.0   | 2.6  | 14.8 | 0.2  | 99.9  | 14.6 | 15.0 | 0.1  | 99.9  | 0.1  | 13.6 | 0.1  |     |     |      |     |      |     |
|                                          | C   | 99.9              | 99.8  | 99.6  | 0.1  | 0.0   | 99.9  | 0.1  | 99.9  | 99.8  | 0.0   | 0.0   | 0.0   | 0.0  | 0.1  | 99.7 | 0.0   | 0.0  | 0.1  | 99.7 | 0.0   | 99.8 | 0.0  | 99.7 |     |     |      |     |      |     |
|                                          | G   | 0.0               | 0.0   | 0.0   | 0.0  | 0.0   | 0.0   | 0.0  | 0.0   | 0.0   | 0.0   | 0.0   | 0.0   | 97.3 | 85.0 | 0.0  | 0.0   | 85.1 | 84.7 | 0.0  | 0.0   | 0.0  | 0.0  | 86.1 |     |     |      |     |      |     |
|                                          | T   | 0.1               | 0.0   | 0.0   | 0.0  | 99.9  | 0.0   | 0.0  | 0.0   | 0.0   | 0.0   | 100.0 | 99.9  | 0.1  | 0.1  | 0.0  | 0.0   | 0.1  | 0.1  | 0.0  | 0.1   | 0.1  | 0.1  | 0.1  |     |     |      |     |      |     |
| -                                        | 0.0 | 0.0               | 0.0   | 0.0   | 0.0  | 0.0   | 0.0   | 0.0  | 0.0   | 0.0   | 0.0   | 0.1   | 0.1   | 0.1  | 0.1  | 0.1  | 0.1   | 0.1  | 0.1  | 0.1  | 0.2   | 0.1  | 0.1  |      |     |     |      |     |      |     |
| AID-seB4max<br>+ Rap Replicate 2         |     | C                 | C     | C     | A    | T     | C     | A    | C     | C     | A     | T     | T     | G    | G    | C    | A     | G    | G    | C    | A     | C    | G    | C    |     |     |      |     |      |     |
|                                          | A   | 0.0               | 0.0   | 0.1   | 99.9 | 0.0   | 0.0   | 99.9 | 0.0   | 0.0   | 100.0 | 0.0   | 0.0   | 2.6  | 14.6 | 0.0  | 99.8  | 14.6 | 14.9 | 0.1  | 99.8  | 0.0  | 13.5 | 0.0  |     |     |      |     |      |     |
|                                          | C   | 99.9              | 99.9  | 99.9  | 0.1  | 0.0   | 99.9  | 0.1  | 99.9  | 99.9  | 0.0   | 0.0   | 0.0   | 0.0  | 0.1  | 99.8 | 0.0   | 0.0  | 0.1  | 99.8 | 0.0   | 99.8 | 0.0  | 99.8 |     |     |      |     |      |     |
|                                          | G   | 0.0               | 0.0   | 0.0   | 0.0  | 0.0   | 0.0   | 0.0  | 0.0   | 0.0   | 0.0   | 0.0   | 0.0   | 97.3 | 85.2 | 0.0  | 0.1   | 85.2 | 84.9 | 0.0  | 0.0   | 0.0  | 0.0  | 86.3 |     |     |      |     |      |     |
|                                          | T   | 0.1               | 0.0   | 0.0   | 0.0  | 100.0 | 0.1   | 0.0  | 0.0   | 0.0   | 0.0   | 99.9  | 99.9  | 0.0  | 0.1  | 0.1  | 0.0   | 0.0  | 0.0  | 0.0  | 0.0   | 0.0  | 0.1  | 0.0  |     |     |      |     |      |     |
|                                          | -   | 0.0               | 0.0   | 0.0   | 0.0  | 0.0   | 0.0   | 0.0  | 0.0   | 0.0   | 0.0   | 0.0   | 0.1   | 0.1  | 0.1  | 0.1  | 0.1   | 0.1  | 0.1  | 0.1  | 0.1   | 0.1  | 0.1  | 0.1  |     |     |      |     |      |     |
| AID-seB4max<br>+ Rap Replicate 3         |     | C                 | C     | C     | A    | T     | C     | A    | C     | C     | A     | T     | T     | G    | G    | C    | A     | G    | G    | C    | A     | C    | G    | C    |     |     |      |     |      |     |
|                                          | A   | 0.0               | 0.0   | 0.0   | 99.9 | 0.0   | 0.0   | 99.8 | 0.0   | 0.0   | 99.9  | 0.0   | 0.0   | 2.3  | 14.2 | 0.0  | 99.8  | 14.2 | 14.5 | 0.0  | 99.8  | 0.0  | 13.1 | 0.0  |     |     |      |     |      |     |
|                                          | C   | 99.9              | 100.0 | 99.9  | 0.1  | 0.0   | 100.0 | 0.1  | 99.9  | 99.9  | 0.0   | 0.0   | 0.0   | 0.0  | 0.0  | 99.7 | 0.0   | 0.0  | 0.1  | 99.8 | 0.0   | 99.8 | 0.0  | 99.8 |     |     |      |     |      |     |
|                                          | G   | 0.0               | 0.0   | 0.0   | 0.0  | 0.0   | 0.0   | 0.0  | 0.0   | 0.0   | 0.0   | 0.0   | 0.0   | 97.5 | 85.5 | 0.0  | 0.1   | 85.6 | 85.3 | 0.0  | 0.0   | 0.0  | 0.0  | 86.8 |     |     |      |     |      |     |
|                                          | T   | 0.1               | 0.0   | 0.0   | 0.0  | 100.0 | 0.0   | 0.0  | 0.0   | 0.0   | 0.0   | 99.9  | 99.8  | 0.0  | 0.1  | 0.1  | 0.0   | 0.0  | 0.0  | 0.0  | 0.0   | 0.0  | 0.1  | 0.0  |     |     |      |     |      |     |
|                                          | -   | 0.0               | 0.0   | 0.0   | 0.0  | 0.0   | 0.0   | 0.0  | 0.0   | 0.0   | 0.0   | 0.1   | 0.1   | 0.1  | 0.2  | 0.1  | 0.1   | 0.1  | 0.1  | 0.1  | 0.1   | 0.1  | 0.1  | 0.1  |     |     |      |     |      |     |
| AID-seB4max<br>IRES NoRap<br>Replicate 1 |     | PAM               |       |       | 20   |       |       | 15   |       |       | 10    |       |       | 5    |      |      | 1     |      |      |      |       |      |      |      |     |     |      |     |      |     |
|                                          |     | C                 | C     | C     | A    | T     | C     | A    | C     | C     | A     | T     | T     | G    | G    | C    | A     | G    | G    | C    | A     | C    | G    | C    |     |     |      |     |      |     |
|                                          | A   | 0.1               | 0.2   | 0.3   | 99.9 | 0.0   | 0.0   | 99.9 | 0.0   | 0.1   | 100.0 | 0.0   | 0.0   | 0.1  | 0.3  | 0.2  | 100.0 | 0.3  | 0.3  | 0.1  | 99.9  | 0.0  | 0.3  | 0.1  |     |     |      |     |      |     |
|                                          | C   | 99.9              | 99.8  | 99.7  | 0.0  | 0.0   | 99.9  | 0.0  | 100.0 | 99.9  | 0.0   | 0.0   | 0.0   | 0.0  | 0.0  | 99.7 | 0.0   | 0.0  | 0.0  | 99.9 | 0.0   | 99.9 | 0.0  | 99.9 |     |     |      |     |      |     |
|                                          | G   | 0.0               | 0.0   | 0.0   | 0.0  | 0.0   | 0.0   | 0.0  | 0.0   | 0.0   | 0.0   | 0.0   | 0.0   | 99.8 | 99.7 | 0.0  | 0.0   | 99.6 | 99.6 | 0.0  | 0.0   | 0.0  | 0.0  | 99.6 |     |     |      |     |      |     |
|                                          | T   | 0.0               | 0.0   | 0.0   | 0.0  | 100.0 | 31.0  | 0.0  | 0.0   | 0.0   | 0.0   | 100.0 | 99.9  | 0.1  | 0.0  | 0.0  | 0.0   | 0.1  | 0.1  | 0.0  | 0.0   | 0.0  | 0.0  | 0.1  |     |     |      |     |      |     |
| -                                        | 0.0 | 0.0               | 0.0   | 0.0   | 0.0  | 0.0   | 0.0   | 0.0  | 0.0   | 0.0   | 0.0   | 0.0   | 0.0   | 0.0  | 0.0  | 0.0  | 0.0   | 0.0  | 0.0  | 0.0  | 0.0   | 0.0  | 0.0  |      |     |     |      |     |      |     |
| AID-seB4max<br>IRES NoRap<br>Replicate 2 |     | C                 | C     | C     | A    | T     | C     | A    | C     | C     | A     | T     | T     | G    | G    | C    | A     | G    | G    | C    | A     | C    | G    | C    |     |     |      |     |      |     |
|                                          | A   | 0.0               | 0.0   | 0.0   | 99.9 | 0.0   | 0.0   | 99.9 | 0.0   | 0.0   | 100.0 | 0.0   | 0.0   | 0.2  | 0.9  | 0.0  | 99.9  | 0.9  | 1.0  | 0.0  | 100.0 | 0.0  | 0.9  | 0.0  |     |     |      |     |      |     |
|                                          | C   | 99.9              | 100.0 | 100.0 | 0.0  | 0.0   | 100.0 | 0.0  | 100.0 | 100.0 | 0.0   | 0.0   | 0.0   | 0.0  | 0.0  | 99.9 | 0.0   | 0.0  | 0.0  | 99.9 | 0.0   | 99.8 | 0.0  | 99.9 |     |     |      |     |      |     |
|                                          | G   | 0.0               | 0.0   | 0.0   | 0.0  | 0.0   | 0.0   | 0.0  | 0.0   | 0.0   | 0.0   | 0.0   | 0.0   | 99.7 | 99.0 | 0.0  | 0.0   | 99.0 | 99.0 | 0.0  | 0.0   | 0.0  | 0.0  | 99.1 |     |     |      |     |      |     |
|                                          | T   | 0.1               | 0.0   | 0.0   | 0.0  | 100.0 | 0.0   | 0.0  | 0.0   | 0.0   | 0.0   | 100.0 | 100.0 | 0.0  | 0.0  | 0.0  | 0.0   | 0.0  | 0.0  | 0.0  | 0.0   | 0.0  | 0.1  | 0.0  |     |     |      |     |      |     |
|                                          | -   | 0.0               | 0.0   | 0.0   | 0.0  | 0.0   | 0.0   | 0.0  | 0.0   | 0.0   | 0.0   |       |       |      |      |      |       |      |      |      |       |      |      |      |     |     |      |     |      |     |

# Supplementary Figure 3

| d         |   | EMXI |      |      |      |      |      |      |      |      |      |      |      |      |      |      |      |      |      |      |      |      |      |      |      |      |     |  |
|-----------|---|------|------|------|------|------|------|------|------|------|------|------|------|------|------|------|------|------|------|------|------|------|------|------|------|------|-----|--|
|           |   | E225 |      |      |      | S226 |      |      |      | E227 |      |      |      | Q228 |      |      |      | K229 |      |      |      | K230 |      |      |      | K231 |     |  |
|           |   | G    | A    | G    | T    | C    | C    | G    | A    | G    | C    | A    | G    | A    | A    | G    | A    | A    | G    | A    | A    | G    | A    | A    | G    | G    | G   |  |
| untreated | A | 0.0  | 99.9 | 0.0  | 0.0  | 0.0  | 0.0  | 0.0  | 99.9 | 0.0  | 0.0  | 99.8 | 0.0  | 99.7 | 99.9 | 0.0  | 99.9 | 99.9 | 0.0  | 99.4 | 99.6 | 0.0  | 99.4 | 99.6 | 0.0  | 0.0  | 0.0 |  |
|           | C | 0.0  | 0.0  | 0.0  | 0.0  | 99.8 | 99.8 | 0.0  | 0.0  | 0.0  | 99.8 | 0.0  | 0.0  | 0.1  | 0.0  | 0.0  | 0.0  | 0.0  | 0.0  | 0.0  | 0.0  | 0.0  | 0.0  | 0.0  | 0.0  | 0.0  | 0.0 |  |
|           | G | 99.9 | 0.0  | 99.8 | 0.1  | 0.0  | 0.0  | 99.8 | 0.0  | 99.9 | 0.1  | 0.1  | 99.9 | 0.1  | 0.1  | 99.7 | 0.0  | 0.0  | 99.5 | 0.1  | 0.0  | 99.8 | 99.8 | 99.8 | 99.8 | 99.8 |     |  |
|           | T | 0.0  | 0.0  | 0.1  | 99.7 | 0.2  | 0.1  | 0.1  | 0.0  | 0.1  | 0.1  | 0.0  | 0.0  | 0.0  | 0.0  | 0.2  | 0.0  | 0.0  | 0.0  | 0.1  | 0.1  | 0.0  | 0.1  | 0.1  | 0.0  | 0.1  |     |  |
|           | - | 0.0  | 0.0  | 0.0  | 0.0  | 0.0  | 0.0  | 0.0  | 0.0  | 0.0  | 0.0  | 0.0  | 0.0  | 0.0  | 0.0  | 0.0  | 0.0  | 0.0  | 0.0  | 0.4  | 0.4  | 0.4  | 0.0  | 0.0  | 0.0  | 0.0  |     |  |

  

| AID-seBEMax Replicate 1 |   | 1    |      |      |      | 5    |      |      |      | 10   |      |      |      | 15   |      |      |      | 20   |      |      |      | PAM  |      |      |      |      |     |
|-------------------------|---|------|------|------|------|------|------|------|------|------|------|------|------|------|------|------|------|------|------|------|------|------|------|------|------|------|-----|
|                         |   | G    | A    | G    | T    | C    | C    | G    | A    | G    | C    | A    | G    | A    | A    | G    | A    | A    | G    | A    | A    | G    | G    | G    |      |      |     |
| AID-seBEMax Replicate 1 | A | 0.6  | 99.3 | 0.8  | 0.1  | 0.7  | 0.5  | 0.1  | 99.2 | 0.5  | 0.6  | 99.4 | 0.2  | 99.4 | 99.5 | 0.1  | 99.6 | 99.7 | 0.0  | 99.6 | 99.6 | 0.1  | 99.6 | 99.6 | 0.1  | 0.0  | 0.4 |
|                         | C | 0.0  | 0.0  | 0.0  | 0.0  | 70.7 | 76.0 | 0.0  | 0.0  | 0.0  | 70.2 | 0.0  | 0.0  | 0.0  | 0.0  | 0.0  | 0.0  | 0.0  | 0.0  | 0.0  | 0.0  | 0.0  | 0.0  | 0.0  | 0.0  | 0.0  | 0.0 |
|                         | G | 98.2 | 0.0  | 98.3 | 0.0  | 0.3  | 0.2  | 98.1 | 0.0  | 98.5 | 0.6  | 0.0  | 98.9 | 0.0  | 0.0  | 99.1 | 0.0  | 0.0  | 99.2 | 0.0  | 0.0  | 99.0 | 99.3 | 99.1 | 99.0 | 99.1 |     |
|                         | T | 0.5  | 0.0  | 0.1  | 99.2 | 27.6 | 22.4 | 0.9  | 0.0  | 0.2  | 27.9 | 0.0  | 0.3  | 0.0  | 0.0  | 0.0  | 0.4  | 0.0  | 0.0  | 0.3  | 0.0  | 0.0  | 0.0  | 0.7  | 0.5  | 0.3  |     |
|                         | - | 0.7  | 0.7  | 0.8  | 0.8  | 0.8  | 0.9  | 0.8  | 0.8  | 0.8  | 0.8  | 0.6  | 0.6  | 0.5  | 0.4  | 0.5  | 0.4  | 0.4  | 0.3  | 0.5  | 0.4  | 0.4  | 0.2  | 0.2  | 0.2  | 0.2  |     |

  

| AID-seBEMax Replicate 2 |      | G   | A    | G    | T    | C    | C    | G   | A    | G    | C   | A    | G    | A   | A    | G    | A   | A    | G    | A   | A    | G    | G    | G    |      |
|-------------------------|------|-----|------|------|------|------|------|-----|------|------|-----|------|------|-----|------|------|-----|------|------|-----|------|------|------|------|------|
|                         |      | A   | 0.6  | 99.3 | 0.9  | 0.1  | 0.7  | 0.3 | 0.1  | 99.1 | 0.3 | 0.6  | 99.1 | 0.1 | 99.4 | 99.5 | 0.0 | 99.7 | 99.7 | 0.1 | 99.5 | 99.6 | 0.0  | 0.0  | 0.0  |
| C                       | 0.0  | 0.0 | 0.1  | 0.1  | 55.2 | 64.8 | 0.0  | 0.0 | 0.0  | 54.4 | 0.1 | 0.0  | 0.0  | 0.0 | 0.0  | 0.0  | 0.0 | 0.0  | 0.0  | 0.0 | 0.0  | 0.0  | 0.0  | 0.0  |      |
| G                       | 98.5 | 0.0 | 98.2 | 0.2  | 0.3  | 0.2  | 98.9 | 0.0 | 98.7 | 0.9  | 0.0 | 99.1 | 0.0  | 0.0 | 99.5 | 0.0  | 0.0 | 99.5 | 0.0  | 0.0 | 99.7 | 99.8 | 99.2 | 99.2 | 99.2 |
| T                       | 0.1  | 0.0 | 0.1  | 99.8 | 42.9 | 33.8 | 0.1  | 0.0 | 0.0  | 43.1 | 0.0 | 0.0  | 0.0  | 0.0 | 0.0  | 0.0  | 0.0 | 0.1  | 0.0  | 0.1 | 0.0  | 0.2  | 0.1  | 0.1  |      |

  

| AID-seBEMax Replicate 3 |      | G   | A    | G    | T    | C    | C    | G   | A    | G    | C   | A    | G    | A   | A    | G    | A   | A    | G    | A   | A    | G    | G    | G    |      |     |
|-------------------------|------|-----|------|------|------|------|------|-----|------|------|-----|------|------|-----|------|------|-----|------|------|-----|------|------|------|------|------|-----|
|                         |      | A   | 0.5  | 99.4 | 0.6  | 0.0  | 0.5  | 0.1 | 0.2  | 99.4 | 0.3 | 0.3  | 99.4 | 0.1 | 99.6 | 99.6 | 0.1 | 99.6 | 99.7 | 0.0 | 99.5 | 99.5 | 0.1  | 99.5 | 99.5 | 0.1 |
| C                       | 0.0  | 0.0 | 0.1  | 0.0  | 65.0 | 73.5 | 0.0  | 0.0 | 0.0  | 64.9 | 0.0 | 0.0  | 0.0  | 0.0 | 0.0  | 0.0  | 0.0 | 0.0  | 0.0  | 0.0 | 0.0  | 0.0  | 0.0  | 0.0  | 0.0  | 0.0 |
| G                       | 98.8 | 0.0 | 98.7 | 0.2  | 0.2  | 0.2  | 99.1 | 0.0 | 99.1 | 0.7  | 0.0 | 99.3 | 0.0  | 0.0 | 99.5 | 0.0  | 0.0 | 99.4 | 0.0  | 0.0 | 99.5 | 99.7 | 99.6 | 99.6 | 99.6 |     |
| T                       | 0.1  | 0.0 | 0.1  | 99.8 | 33.7 | 25.6 | 0.1  | 0.0 | 0.0  | 33.4 | 0.0 | 0.1  | 0.0  | 0.0 | 0.1  | 0.0  | 0.0 | 0.0  | 0.0  | 0.0 | 0.0  | 0.2  | 0.1  | 0.0  |      |     |

  

| AID-seBE-IREs +Rap Replicate 1 |   | 1    |      |      |      | 5    |      |      |      | 10   |      |      |      | 15   |      |      |      | 20   |      |      |      | PAM  |      |      |      |      |
|--------------------------------|---|------|------|------|------|------|------|------|------|------|------|------|------|------|------|------|------|------|------|------|------|------|------|------|------|------|
|                                |   | G    | A    | G    | T    | C    | C    | G    | A    | G    | C    | A    | G    | A    | A    | G    | A    | A    | G    | A    | A    | G    | G    | G    |      |      |
| AID-seBE-IREs +Rap Replicate 1 | A | 0.0  | 99.9 | 0.1  | 0.0  | 0.2  | 0.2  | 0.0  | 99.9 | 0.0  | 0.1  | 99.9 | 0.0  | 99.9 | 99.9 | 0.0  | 99.9 | 99.9 | 0.0  | 99.8 | 99.8 | 0.0  | 99.8 | 99.8 | 0.0  | 0.1  |
|                                | C | 0.0  | 0.0  | 0.0  | 0.0  | 85.5 | 88.7 | 0.0  | 0.0  | 0.0  | 85.6 | 0.0  | 0.0  | 0.0  | 0.0  | 0.0  | 0.0  | 0.0  | 0.0  | 0.0  | 0.0  | 0.0  | 0.0  | 0.0  | 0.0  | 0.0  |
|                                | G | 99.8 | 0.0  | 99.8 | 0.1  | 0.0  | 0.0  | 99.6 | 0.0  | 99.9 | 0.1  | 0.0  | 99.8 | 0.0  | 0.0  | 99.8 | 0.0  | 0.0  | 99.7 | 0.0  | 0.0  | 99.6 | 99.8 | 99.8 | 99.8 | 99.8 |
|                                | T | 0.1  | 0.0  | 0.0  | 99.8 | 14.1 | 11.0 | 0.3  | 0.0  | 0.1  | 14.2 | 0.0  | 0.1  | 0.0  | 0.0  | 0.1  | 0.0  | 0.0  | 0.1  | 0.0  | 0.0  | 0.0  | 0.3  | 0.1  | 0.1  |      |
|                                | - | 0.1  | 0.1  | 0.1  | 0.1  | 0.1  | 0.1  | 0.1  | 0.1  | 0.1  | 0.1  | 0.1  | 0.1  | 0.1  | 0.1  | 0.1  | 0.1  | 0.1  | 0.1  | 0.2  | 0.2  | 0.2  | 0.1  | 0.1  | 0.1  |      |

  

| AID-seBE-IREs +Rap Replicate 2 |      | G   | A    | G    | T    | C    | C    | G   | A    | G    | C   | A    | G    | A   | A    | G    | A   | A    | G    | A   | A    | G    | G    | G    |      |
|--------------------------------|------|-----|------|------|------|------|------|-----|------|------|-----|------|------|-----|------|------|-----|------|------|-----|------|------|------|------|------|
|                                |      | A   | 0.0  | 99.9 | 0.0  | 0.0  | 0.1  | 0.0 | 0.0  | 99.9 | 0.0 | 0.1  | 99.9 | 0.0 | 99.9 | 99.9 | 0.0 | 99.9 | 99.9 | 0.0 | 99.7 | 99.8 | 0.0  | 99.7 | 99.8 |
| C                              | 0.0  | 0.0 | 0.0  | 0.0  | 85.2 | 88.6 | 0.0  | 0.0 | 0.0  | 85.5 | 0.0 | 0.0  | 0.0  | 0.0 | 0.0  | 0.0  | 0.0 | 0.0  | 0.0  | 0.0 | 0.0  | 0.0  | 0.0  | 0.0  | 0.0  |
| G                              | 99.8 | 0.0 | 99.9 | 0.1  | 0.0  | 0.0  | 99.8 | 0.0 | 99.8 | 0.1  | 0.1 | 99.9 | 0.0  | 0.0 | 99.9 | 0.0  | 0.0 | 99.7 | 0.0  | 0.0 | 99.8 | 99.9 | 99.9 | 99.9 | 99.9 |
| T                              | 0.1  | 0.0 | 0.0  | 99.8 | 14.7 | 11.2 | 0.1  | 0.0 | 0.1  | 14.2 | 0.0 | 0.0  | 0.0  | 0.0 | 0.0  | 0.0  | 0.0 | 0.0  | 0.0  | 0.0 | 0.0  | 0.2  | 0.1  | 0.1  |      |

  

| AID-seBE-IREs +Rap Replicate 3 |      | G   | A    | G    | T    | C    | C    | G   | A    | G    | C   | A    | G    | A   | A    | G    | A   | A    | G    | A   | A    | G    | G    | G    |      |
|--------------------------------|------|-----|------|------|------|------|------|-----|------|------|-----|------|------|-----|------|------|-----|------|------|-----|------|------|------|------|------|
|                                |      | A   | 0.1  | 99.9 | 0.0  | 0.0  | 0.1  | 0.2 | 0.0  | 99.9 | 0.0 | 0.1  | 99.9 | 0.0 | 99.9 | 99.9 | 0.0 | 99.9 | 99.9 | 0.0 | 99.8 | 99.8 | 0.0  | 99.8 | 99.8 |
| C                              | 0.0  | 0.0 | 0.0  | 0.0  | 86.2 | 89.2 | 0.0  | 0.0 | 0.0  | 85.9 | 0.0 | 0.0  | 0.0  | 0.0 | 0.0  | 0.0  | 0.0 | 0.0  | 0.0  | 0.0 | 0.0  | 0.0  | 0.0  | 0.0  | 0.0  |
| G                              | 99.8 | 0.0 | 99.9 | 0.1  | 0.1  | 0.0  | 99.8 | 0.0 | 99.9 | 0.1  | 0.0 | 99.9 | 0.0  | 0.0 | 99.9 | 0.0  | 0.0 | 99.8 | 0.0  | 0.0 | 99.7 | 99.8 | 99.8 | 99.8 | 99.8 |
| T                              | 0.1  | 0.0 | 0.1  | 99.8 | 13.6 | 10.5 | 0.1  | 0.0 | 0.0  | 13.9 | 0.0 | 0.0  | 0.0  | 0.0 | 0.0  | 0.0  | 0.0 | 0.0  | 0.0  | 0.0 | 0.0  | 0.2  | 0.1  | 0.1  |      |

  

| AID-seBE-IREs NoRap Replicate 1 |   | 1    |      |       |      | 5    |      |      |      | 10   |      |      |      | 15   |       |      |      | 20    |      |      |      | PAM  |      |      |      |      |
|---------------------------------|---|------|------|-------|------|------|------|------|------|------|------|------|------|------|-------|------|------|-------|------|------|------|------|------|------|------|------|
|                                 |   | G    | A    | G     | T    | C    | C    | G    | A    | G    | C    | A    | G    | A    | A     | G    | A    | A     | G    | A    | A    | G    | G    | G    |      |      |
| AID-seBE-IREs NoRap Replicate 1 | A | 0.0  | 99.9 | 0.0   | 0.0  | 0.2  | 0.4  | 0.0  | 99.9 | 0.0  | 0.1  | 99.9 | 0.0  | 99.9 | 100.0 | 0.0  | 99.9 | 100.0 | 0.0  | 99.9 | 99.9 | 0.0  | 99.9 | 99.9 | 0.0  | 0.0  |
|                                 | C | 0.0  | 0.0  | 0.0   | 0.0  | 98.4 | 98.2 | 0.0  | 0.0  | 0.0  | 99.5 | 0.0  | 0.0  | 0.0  | 0.0   | 0.0  | 0.0  | 0.0   | 0.0  | 0.0  | 0.0  | 0.0  | 0.0  | 0.0  | 0.0  |      |
|                                 | G | 99.7 | 0.0  | 100.0 | 0.1  | 0.0  | 0.0  | 99.6 | 0.0  | 99.9 | 0.0  | 0.0  | 99.8 | 0.0  | 0.0   | 99.8 | 0.0  | 0.0   | 99.7 | 0.0  | 0.0  | 99.4 | 99.7 | 99.9 | 99.9 | 99.9 |
|                                 | T | 0.3  | 0.0  | 0.0   | 99.9 | 1.4  | 1.4  | 0.3  | 0.0  | 0.1  | 0.4  | 0.0  | 0.1  | 0.0  | 0.0   | 0.2  | 0.0  | 0.0   | 0.2  | 0.0  | 0.1  | 0.0  | 0.6  | 0.3  | 0.1  |      |
|                                 | - | 0.0  | 0.0  | 0.0   | 0.0  | 0.0  | 0.0  | 0.0  | 0.0  | 0.0  | 0.0  | 0.0  | 0.0  | 0.0  | 0.0   | 0.0  | 0.0  | 0.0   | 0.0  | 0.1  | 0.1  | 0.1  | 0.1  | 0.0  | 0.0  |      |

  

| AID-seBE-IREs NoRap Replicate 2 |      | G   | A    | G    | T    | C    | C    | G   | A    | G     | C   | A    | G    | A   | A    | G     | A   | A     | G     | A   | A    | G    | G    | G    |      |
|---------------------------------|------|-----|------|------|------|------|------|-----|------|-------|-----|------|------|-----|------|-------|-----|-------|-------|-----|------|------|------|------|------|
|                                 |      | A   | 0.0  | 99.9 | 0.0  | 0.0  | 0.1  | 0.2 | 0.0  | 100.0 | 0.0 | 0.0  | 99.9 | 0.0 | 99.9 | 100.0 | 0.0 | 100.0 | 100.0 | 0.0 | 99.8 | 99.7 | 0.0  | 0.0  | 0.0  |
| C                               | 0.0  | 0.0 | 0.0  | 0.0  | 99.7 | 99.6 | 0.0  | 0.0 | 0.0  | 99.8  | 0.0 | 0.0  | 0.0  | 0.0 | 0.0  | 0.0   | 0.0 | 0.0   | 0.0   | 0.0 | 0.0  | 0.0  | 0.0  | 0.0  |      |
| G                               | 99.9 | 0.0 | 99.9 | 0.1  | 0.0  | 0.0  | 99.8 | 0.0 | 99.9 | 0.0   | 0.0 | 99.9 | 0.1  | 0.0 | 99.9 | 0.0   | 0.0 | 99.7  | 0.0   | 0.0 | 99.7 | 99.9 | 99.9 | 99.9 | 99.9 |
| T                               | 0.1  | 0.0 | 0.1  | 99.9 | 0.2  | 0.2  | 0.1  | 0.0 | 0.1  | 0.2   | 0.0 | 0.1  | 0.0  | 0.0 | 0.1  | 0.0   | 0.0 | 0.1   | 0.0   | 0.1 | 0.0  | 0.2  | 0.1  | 0.1  |      |

  

| AID-seBE-IREs NoRap Replicate 3 |      | G   | A    | G    | T    | C    | C    | G   | A    | G    | C   | A    | G    | A   | A    | G    | A   | A    | G     | A   | A    | G    | G    | G    |      |
|---------------------------------|------|-----|------|------|------|------|------|-----|------|------|-----|------|------|-----|------|------|-----|------|-------|-----|------|------|------|------|------|
|                                 |      | A   | 0.0  | 99.9 | 0.0  | 0.0  | 0.1  | 0.3 | 0.0  | 99.9 | 0.0 | 0.0  | 99.9 | 0.0 | 99.9 | 99.9 | 0.0 | 99.9 | 100.0 | 0.0 | 99.8 | 99.8 | 0.0  | 0.0  | 0.0  |
| C                               | 0.0  | 0.0 | 0.0  | 0.0  | 99.4 | 99.4 | 0.0  | 0.0 | 0.0  | 99.6 | 0.0 | 0.0  | 0.0  | 0.0 | 0.0  | 0.0  | 0.0 | 0.0  | 0.0   | 0.0 | 0.0  | 0.0  | 0.0  | 0.0  |      |
| G                               | 99.8 | 0.0 | 99.9 | 0.2  | 0.0  | 0.0  | 99.7 | 0.0 | 99.9 | 0.0  | 0.0 | 99.9 | 0.0  | 0.0 | 99.9 | 0.0  | 0.0 | 99.8 | 0.0   | 0.0 | 99.7 | 99.8 | 99.9 | 99.9 | 99.9 |
| T                               | 0.2  | 0.0 | 0.0  | 99.8 | 0.4  | 0.3  | 0.2  | 0.0 | 0.0  | 0.3  | 0.0 | 0.1  | 0.0  | 0.0 | 0.1  | 0.0  | 0.0 | 0.1  | 0.0   | 0.1 | 0.0  | 0.3  | 0.1  | 0.1  |      |

# Supplementary Figure 3

| e                                             |     | EMXI_OTI |       |       |       |       |       |       |       |       |       |      |       |       |       |       |      |       |       |       |       |       |       |       |
|-----------------------------------------------|-----|----------|-------|-------|-------|-------|-------|-------|-------|-------|-------|------|-------|-------|-------|-------|------|-------|-------|-------|-------|-------|-------|-------|
| untreated                                     |     | T        | T     | C     | T     | T     | C     | T     | T     | C     | T     | G    | C     | T     | T     | A     | G    | A     | C     | T     | C     | T     | T     | G     |
|                                               | A   | 0.0      | 0.0   | 0.0   | 0.0   | 0.0   | 0.0   | 0.0   | 0.0   | 0.0   | 0.0   | 0.0  | 0.0   | 0.0   | 0.0   | 100.0 | 0.1  | 100.0 | 0.0   | 0.0   | 0.0   | 0.0   | 0.0   | 0.0   |
|                                               | C   | 0.0      | 0.0   | 99.9  | 0.0   | 0.0   | 99.9  | 0.0   | 0.0   | 100.0 | 0.0   | 0.0  | 100.0 | 0.0   | 0.0   | 0.0   | 0.0  | 0.0   | 99.9  | 0.0   | 100.0 | 0.0   | 0.0   | 0.0   |
|                                               | G   | 0.0      | 0.0   | 0.0   | 0.0   | 0.0   | 0.0   | 0.0   | 0.0   | 0.0   | 0.0   | 99.9 | 0.0   | 0.0   | 0.0   | 0.0   | 0.0  | 99.9  | 0.0   | 0.0   | 0.0   | 0.0   | 0.0   | 100.0 |
|                                               | T   | 100.0    | 100.0 | 0.0   | 99.9  | 100.0 | 0.0   | 100.0 | 100.0 | 0.0   | 100.0 | 0.0  | 0.0   | 100.0 | 99.9  | 0.0   | 0.0  | 0.0   | 0.0   | 100.0 | 0.0   | 99.9  | 100.0 | 0.0   |
| -                                             | 0.0 | 0.0      | 0.0   | 0.0   | 0.0   | 0.0   | 0.0   | 0.0   | 0.0   | 0.0   | 0.0   | 0.0  | 0.0   | 0.0   | 0.0   | 0.0   | 0.0  | 0.0   | 0.0   | 0.0   | 0.0   | 0.0   | 0.0   |       |
| AID-seBE <sup>max</sup><br>Replicate 1        |     | T        | T     | C     | T     | T     | C     | T     | T     | C     | T     | G    | C     | T     | T     | A     | G    | A     | C     | T     | C     | T     | T     | G     |
|                                               | A   | 0.0      | 0.0   | 0.1   | 0.0   | 0.0   | 0.1   | 0.0   | 0.0   | 0.1   | 0.0   | 9.1  | 0.1   | 0.0   | 0.0   | 100.0 | 8.8  | 100.0 | 0.0   | 0.0   | 0.3   | 0.0   | 0.0   | 11.0  |
|                                               | C   | 0.0      | 0.0   | 99.8  | 0.0   | 0.0   | 99.8  | 0.0   | 0.0   | 99.8  | 0.0   | 0.0  | 99.7  | 0.0   | 0.0   | 0.0   | 0.0  | 0.0   | 99.3  | 0.0   | 99.4  | 0.0   | 0.0   | 0.3   |
|                                               | G   | 0.0      | 0.0   | 0.0   | 0.0   | 0.0   | 0.0   | 0.0   | 0.0   | 0.0   | 0.0   | 90.7 | 0.0   | 0.0   | 0.0   | 0.0   | 91.0 | 0.0   | 0.0   | 0.0   | 0.0   | 0.0   | 0.0   | 88.7  |
|                                               | T   | 99.9     | 99.9  | 0.0   | 99.9  | 99.9  | 0.0   | 99.9  | 99.9  | 0.1   | 99.9  | 0.1  | 0.2   | 99.9  | 100.0 | 0.0   | 0.1  | 0.0   | 0.7   | 100.0 | 0.3   | 99.9  | 99.9  | 0.1   |
| -                                             | 0.1 | 0.1      | 0.1   | 0.1   | 0.1   | 0.1   | 0.0   | 0.0   | 0.0   | 0.0   | 0.0   | 0.0  | 0.0   | 0.0   | 0.0   | 0.0   | 0.0  | 0.0   | 0.0   | 0.0   | 0.0   | 0.0   | 0.0   |       |
| AID-seBE <sup>max</sup><br>Replicate 2        |     | T        | T     | C     | T     | T     | C     | T     | T     | C     | T     | G    | C     | T     | T     | A     | G    | A     | C     | T     | C     | T     | T     | G     |
|                                               | A   | 0.0      | 0.0   | 0.1   | 0.0   | 0.0   | 0.1   | 0.0   | 0.0   | 0.2   | 0.0   | 10.7 | 0.1   | 0.0   | 0.0   | 100.0 | 10.4 | 99.9  | 0.0   | 0.0   | 0.3   | 0.0   | 0.0   | 14.7  |
|                                               | C   | 0.0      | 0.0   | 99.9  | 0.0   | 0.0   | 99.8  | 0.0   | 0.0   | 99.7  | 0.0   | 0.1  | 99.6  | 0.0   | 0.0   | 0.0   | 0.1  | 0.0   | 99.1  | 0.0   | 99.3  | 0.0   | 0.0   | 0.3   |
|                                               | G   | 0.0      | 0.0   | 0.0   | 0.0   | 0.0   | 0.0   | 0.0   | 0.0   | 0.0   | 0.0   | 89.1 | 0.0   | 0.0   | 0.0   | 0.0   | 89.3 | 0.0   | 0.0   | 0.1   | 0.0   | 0.0   | 0.0   | 84.9  |
|                                               | T   | 99.9     | 99.9  | 0.0   | 100.0 | 100.0 | 0.1   | 100.0 | 99.9  | 0.1   | 99.9  | 0.1  | 0.3   | 100.0 | 100.0 | 0.0   | 0.1  | 0.0   | 0.8   | 99.8  | 0.4   | 99.9  | 99.9  | 0.1   |
| -                                             | 0.0 | 0.0      | 0.0   | 0.0   | 0.0   | 0.0   | 0.0   | 0.0   | 0.1   | 0.1   | 0.0   | 0.0  | 0.0   | 0.0   | 0.0   | 0.0   | 0.0  | 0.1   | 0.1   | 0.1   | 0.1   | 0.1   | 0.1   |       |
| AID-seBE <sup>max</sup><br>Replicate 3        |     | T        | T     | C     | T     | T     | C     | T     | T     | C     | T     | G    | C     | T     | T     | A     | G    | A     | C     | T     | C     | T     | T     | G     |
|                                               | A   | 0.0      | 0.0   | 0.1   | 0.0   | 0.0   | 0.1   | 0.0   | 0.0   | 0.1   | 0.0   | 9.0  | 0.0   | 0.0   | 0.0   | 100.0 | 8.9  | 99.9  | 0.0   | 0.0   | 0.2   | 0.0   | 0.0   | 11.7  |
|                                               | C   | 0.0      | 0.0   | 99.8  | 0.0   | 0.0   | 99.8  | 0.0   | 0.0   | 99.8  | 0.0   | 0.1  | 99.6  | 0.0   | 0.0   | 0.0   | 0.0  | 0.0   | 99.3  | 0.0   | 99.4  | 0.0   | 0.0   | 0.2   |
|                                               | G   | 0.0      | 0.0   | 0.0   | 0.0   | 0.0   | 0.0   | 0.0   | 0.0   | 0.0   | 0.0   | 90.8 | 0.0   | 0.0   | 0.0   | 0.0   | 90.8 | 0.0   | 0.0   | 0.0   | 0.0   | 0.0   | 0.0   | 88.0  |
|                                               | T   | 99.9     | 100.0 | 0.1   | 99.9  | 100.0 | 0.1   | 100.0 | 99.9  | 0.0   | 99.9  | 0.1  | 0.3   | 99.9  | 99.9  | 0.0   | 0.2  | 0.0   | 0.6   | 99.9  | 0.4   | 99.9  | 99.9  | 0.1   |
| -                                             | 0.0 | 0.0      | 0.0   | 0.0   | 0.0   | 0.0   | 0.0   | 0.0   | 0.0   | 0.0   | 0.0   | 0.0  | 0.0   | 0.1   | 0.0   | 0.1   | 0.1  | 0.0   | 0.0   | 0.0   | 0.0   | 0.1   | 0.1   |       |
| AID-seBE- <sup>RES</sup><br>+Rap Replicate 1  |     | T        | T     | C     | T     | T     | C     | T     | T     | C     | T     | G    | C     | T     | T     | A     | G    | A     | C     | T     | C     | T     | T     | G     |
|                                               | A   | 0.0      | 0.0   | 0.1   | 0.0   | 0.0   | 0.1   | 0.0   | 0.0   | 0.0   | 0.0   | 0.9  | 0.0   | 0.0   | 0.0   | 100.0 | 0.9  | 100.0 | 0.0   | 0.0   | 0.1   | 0.0   | 0.0   | 1.6   |
|                                               | C   | 0.0      | 0.0   | 99.8  | 0.0   | 0.0   | 99.8  | 0.0   | 0.0   | 99.9  | 0.0   | 0.0  | 99.9  | 0.0   | 0.0   | 0.0   | 0.0  | 0.0   | 100.0 | 0.0   | 99.8  | 0.0   | 0.0   | 0.0   |
|                                               | G   | 0.0      | 0.0   | 0.0   | 0.0   | 0.0   | 0.0   | 0.0   | 0.0   | 0.0   | 0.0   | 99.1 | 0.0   | 0.0   | 0.0   | 0.0   | 99.0 | 0.0   | 0.0   | 0.0   | 0.0   | 0.0   | 0.0   | 98.4  |
|                                               | T   | 99.9     | 99.9  | 0.0   | 100.0 | 100.0 | 0.0   | 100.0 | 100.0 | 0.0   | 100.0 | 0.0  | 0.0   | 100.0 | 100.0 | 0.0   | 0.1  | 0.0   | 0.0   | 100.0 | 0.0   | 100.0 | 99.9  | 0.0   |
| -                                             | 0.0 | 0.0      | 0.0   | 0.0   | 0.0   | 0.0   | 0.0   | 0.0   | 0.0   | 0.0   | 0.0   | 0.0  | 0.0   | 0.0   | 0.0   | 0.0   | 0.0  | 0.0   | 0.0   | 0.0   | 0.0   | 0.0   | 0.0   |       |
| AID-seBE- <sup>RES</sup><br>+Rap Replicate 2  |     | T        | T     | C     | T     | T     | C     | T     | T     | C     | T     | G    | C     | T     | T     | A     | G    | A     | C     | T     | C     | T     | T     | G     |
|                                               | A   | 0.0      | 0.0   | 0.1   | 0.0   | 0.0   | 0.2   | 0.0   | 0.0   | 0.1   | 0.0   | 0.6  | 0.0   | 0.0   | 0.0   | 100.0 | 0.6  | 100.0 | 0.0   | 0.0   | 0.2   | 0.0   | 0.0   | 1.0   |
|                                               | C   | 0.0      | 0.0   | 99.8  | 0.0   | 0.0   | 99.8  | 0.0   | 0.0   | 99.8  | 0.0   | 0.0  | 99.9  | 0.0   | 0.0   | 0.0   | 0.0  | 0.0   | 100.0 | 0.0   | 99.8  | 0.0   | 0.0   | 0.0   |
|                                               | G   | 0.0      | 0.0   | 0.0   | 0.0   | 0.0   | 0.0   | 0.0   | 0.0   | 0.0   | 0.0   | 99.3 | 0.0   | 0.0   | 0.0   | 0.0   | 99.2 | 0.0   | 0.0   | 0.0   | 0.0   | 0.0   | 0.0   | 98.9  |
|                                               | T   | 99.9     | 100.0 | 0.0   | 99.9  | 100.0 | 0.0   | 99.9  | 99.9  | 0.0   | 100.0 | 0.1  | 0.0   | 100.0 | 100.0 | 0.0   | 0.1  | 0.0   | 0.0   | 100.0 | 0.0   | 100.0 | 99.9  | 0.0   |
| -                                             | 0.0 | 0.0      | 0.0   | 0.0   | 0.0   | 0.0   | 0.0   | 0.1   | 0.0   | 0.0   | 0.0   | 0.0  | 0.0   | 0.0   | 0.0   | 0.0   | 0.0  | 0.0   | 0.0   | 0.0   | 0.0   | 0.0   | 0.0   |       |
| AID-seBE- <sup>RES</sup><br>+Rap Replicate 3  |     | T        | T     | C     | T     | T     | C     | T     | T     | C     | T     | G    | C     | T     | T     | A     | G    | A     | C     | T     | C     | T     | T     | G     |
|                                               | A   | 0.0      | 0.0   | 0.2   | 0.0   | 0.0   | 0.2   | 0.0   | 0.0   | 0.2   | 0.0   | 0.9  | 0.0   | 0.0   | 0.0   | 99.9  | 0.9  | 100.0 | 0.1   | 0.0   | 0.4   | 0.0   | 0.0   | 1.1   |
|                                               | C   | 0.1      | 0.0   | 99.8  | 0.0   | 0.0   | 99.8  | 0.0   | 0.0   | 99.8  | 0.0   | 0.0  | 100.0 | 0.0   | 0.0   | 0.0   | 0.0  | 0.0   | 99.8  | 0.0   | 99.5  | 0.0   | 0.0   | 0.0   |
|                                               | G   | 0.0      | 0.0   | 0.0   | 0.0   | 0.0   | 0.0   | 0.0   | 0.0   | 0.0   | 0.0   | 99.0 | 0.0   | 0.0   | 0.0   | 0.0   | 98.9 | 0.0   | 0.0   | 0.0   | 0.0   | 0.0   | 0.0   | 98.8  |
|                                               | T   | 99.9     | 99.9  | 0.0   | 99.9  | 100.0 | 0.0   | 100.0 | 99.9  | 0.0   | 99.9  | 0.1  | 0.0   | 100.0 | 99.9  | 0.0   | 0.2  | 0.0   | 0.1   | 100.0 | 0.0   | 100.0 | 100.0 | 0.1   |
| -                                             | 0.0 | 0.0      | 0.0   | 0.0   | 0.0   | 0.0   | 0.0   | 0.0   | 0.0   | 0.0   | 0.0   | 0.0  | 0.0   | 0.0   | 0.0   | 0.0   | 0.0  | 0.0   | 0.0   | 0.0   | 0.0   | 0.0   | 0.0   |       |
| AID-seBE- <sup>RES</sup><br>NoRap Replicate 1 |     | T        | T     | C     | T     | T     | C     | T     | T     | C     | T     | G    | C     | T     | T     | A     | G    | A     | C     | T     | C     | T     | T     | G     |
|                                               | A   | 0.0      | 0.0   | 0.1   | 0.0   | 0.0   | 0.1   | 0.0   | 0.0   | 0.1   | 0.0   | 0.0  | 0.0   | 0.0   | 0.0   | 100.0 | 0.0  | 100.0 | 0.0   | 0.0   | 0.2   | 0.0   | 0.0   | 0.0   |
|                                               | C   | 0.0      | 0.0   | 99.9  | 0.0   | 0.0   | 99.9  | 0.0   | 0.0   | 99.8  | 0.0   | 0.0  | 100.0 | 0.0   | 0.0   | 0.0   | 0.0  | 0.0   | 100.0 | 0.0   | 99.8  | 0.0   | 0.0   | 0.0   |
|                                               | G   | 0.0      | 0.0   | 0.0   | 0.0   | 0.0   | 0.0   | 0.0   | 0.0   | 0.0   | 0.0   | 99.9 | 0.0   | 0.0   | 0.0   | 0.0   | 99.9 | 0.0   | 0.0   | 0.0   | 0.0   | 0.0   | 0.0   | 99.9  |
|                                               | T   | 99.9     | 99.9  | 0.0   | 99.9  | 100.0 | 0.0   | 99.9  | 99.9  | 0.0   | 99.9  | 0.1  | 0.0   | 100.0 | 100.0 | 0.0   | 0.1  | 0.0   | 0.0   | 100.0 | 0.0   | 100.0 | 100.0 | 0.0   |
| -                                             | 0.1 | 0.1      | 0.0   | 0.0   | 0.0   | 0.0   | 0.0   | 0.1   | 0.1   | 0.1   | 0.0   | 0.0  | 0.0   | 0.0   | 0.0   | 0.0   | 0.0  | 0.0   | 0.0   | 0.0   | 0.0   | 0.0   | 0.0   |       |
| AID-seBE- <sup>RES</sup><br>NoRap Replicate 2 |     | T        | T     | C     | T     | T     | C     | T     | T     | C     | T     | G    | C     | T     | T     | A     | G    | A     | C     | T     | C     | T     | T     | G     |
|                                               | A   | 0.0      | 0.0   | 0.1   | 0.0   | 0.0   | 0.1   | 0.0   | 0.0   | 0.1   | 0.0   | 0.0  | 0.1   | 0.0   | 0.0   | 100.0 | 0.0  | 100.0 | 0.1   | 0.0   | 0.2   | 0.0   | 0.0   | 0.1   |
|                                               | C   | 0.0      | 0.0   | 99.9  | 0.0   | 0.0   | 99.9  | 0.0   | 0.0   | 99.9  | 0.0   | 0.0  | 99.9  | 0.0   | 0.0   | 0.0   | 0.0  | 0.0   | 99.9  | 0.0   | 99.8  | 0.0   | 0.0   | 0.0   |
|                                               | G   | 0.0      | 0.0   | 0.0   | 0.0   | 0.0   | 0.0   | 0.0   | 0.0   | 0.0   | 0.0   | 99.9 | 0.0   | 0.0   | 0.0   | 0.0   | 99.8 | 0.0   | 0.0   | 0.0   | 0.0   | 0.0   | 0.0   | 99.9  |
|                                               | T   | 100.0    | 100.0 | 0.0   | 100.0 | 100.0 | 0.0   | 100.0 | 99.9  | 0.0   | 99.9  | 0.0  | 0.0   | 100.0 | 100.0 | 0.0   | 0.1  | 0.0   | 0.0   | 100.0 | 0.0   | 100.0 | 100.0 | 0.0   |
| -                                             | 0.0 | 0.0      | 0.0   | 0.0   | 0.0   | 0.0   | 0.0   | 0.0   | 0.0   | 0.0   | 0.0   | 0.0  | 0.0   | 0.0   | 0.0   | 0.0   | 0.0  | 0.0   | 0.0   | 0.0   | 0.0   | 0.0   | 0.0   |       |
| AID-seBE- <sup>RES</sup><br>NoRap Replicate 3 |     | T        | T     | C     | T     | T     | C     | T     | T     | C     | T     | G    | C     | T     | T     | A     | G    | A     | C     | T     | C     | T     | T     | G     |
|                                               | A   | 0.0      | 0.0   | 0.0   | 0.0   | 0.0   | 0.0   | 0.0   | 0.0   | 0.0   | 0.0   | 0.1  | 0.0   | 0.0   | 0.0   | 100.0 | 0.1  | 99.9  | 0.0   | 0.0   | 0.0   | 0.0   | 0.0   | 0.1   |
|                                               | C   | 0.0      | 0.0   | 100.0 | 0.0   | 0.0   | 100.0 | 0.0   | 0.0   | 99.9  | 0.0   | 0.0  | 100.0 | 0.0   | 0.0   | 0.0   | 0.0  | 0.0   | 100.0 | 0.0   | 100.0 | 0.0   | 0.0   | 0.0   |
|                                               | G   | 0.0      | 0.0   | 0.0   | 0.0   | 0.0   | 0.0   | 0.0   | 0.0   | 0.0   | 0.0   | 99.9 | 0.0   | 0.0   | 0.0   | 0.0   | 99.9 | 0.0   | 0.0   | 0.0   | 0.0   | 0.0   | 0.0   | 99.9  |
|                                               | T   | 99.9     | 100.0 | 0.0   | 100.0 | 100.0 | 0.0   | 100.0 | 99.9  | 0.0   | 99.9  | 0.0  | 0.0   | 100.0 | 99.9  | 0.0   | 0.0  | 0.0   | 0.0   | 99.9  | 0.0   | 99.9  | 99.9  | 0.0   |
| -                                             | 0.0 | 0.0      | 0.0   | 0.0   | 0.0   | 0.0   | 0.0   | 0.0   | 0.1   | 0.1   | 0.0   | 0.0  | 0.0   | 0.0   | 0.0   | 0.0   | 0.0  | 0.0   | 0.0   | 0.0   | 0.0   | 0.0   | 0.0   |       |

### Supplementary Figure 3

| f                                  |     | EMXI_OT2 |       |       |       |       |       |       |       |       |       |       |       |       |      |       |       |       |       |      |      |       |      |       |      |     |   |  |  |  |  |
|------------------------------------|-----|----------|-------|-------|-------|-------|-------|-------|-------|-------|-------|-------|-------|-------|------|-------|-------|-------|-------|------|------|-------|------|-------|------|-----|---|--|--|--|--|
| untreated                          |     | C        | C     | A     | T     | T     | C     | T     | T     | C     | T     | T     | C     | T     | G    | C     | T     | C     | A     | G    | A    | C     | G    | T     |      |     |   |  |  |  |  |
|                                    | A   | 0.0      | 0.0   | 99.8  | 0.0   | 0.0   | 0.0   | 0.0   | 0.0   | 0.0   | 0.0   | 0.0   | 0.0   | 0.0   | 0.0  | 0.0   | 0.0   | 99.8  | 0.0   | 99.7 | 0.0  | 0.0   | 0.1  |       |      |     |   |  |  |  |  |
|                                    | C   | 100.0    | 100.0 | 0.2   | 0.0   | 0.0   | 99.9  | 0.0   | 0.1   | 100.0 | 0.0   | 0.0   | 100.0 | 0.0   | 0.0  | 100.0 | 0.0   | 100.0 | 0.2   | 0.0  | 0.2  | 100.0 | 0.0  | 0.2   |      |     |   |  |  |  |  |
|                                    | G   | 0.0      | 0.0   | 0.0   | 0.0   | 0.0   | 0.0   | 0.0   | 0.0   | 0.0   | 0.0   | 0.0   | 0.1   | 99.9  | 0.0  | 0.0   | 0.0   | 0.0   | 0.0   | 99.9 | 0.0  | 0.0   | 0.0  | 99.9  | 0.0  |     |   |  |  |  |  |
|                                    | T   | 0.0      | 0.0   | 0.0   | 100.0 | 99.9  | 0.0   | 99.9  | 99.9  | 0.0   | 100.0 | 99.9  | 0.0   | 99.9  | 0.0  | 0.0   | 100.0 | 0.0   | 0.0   | 0.1  | 0.0  | 0.0   | 0.0  | 0.1   | 99.7 | 0.0 |   |  |  |  |  |
|                                    | -   | 0.0      | 0.0   | 0.0   | 0.0   | 0.0   | 0.0   | 0.0   | 0.0   | 0.0   | 0.0   | 0.0   | 0.0   | 0.0   | 0.0  | 0.0   | 0.0   | 0.0   | 0.0   | 0.0  | 0.0  | 0.0   | 0.0  | 0.0   | 0.0  | 0.0 |   |  |  |  |  |
| AID-seBEmax<br>Replicate 1         |     | PAM      |       |       |       |       | 20    |       |       |       |       | 15    |       |       |      |       | 10    |       |       |      |      | 5     |      |       |      |     | 1 |  |  |  |  |
|                                    |     | C        | C     | A     | T     | T     | C     | T     | T     | C     | T     | T     | C     | T     | G    | C     | T     | C     | A     | G    | A    | C     | G    | T     |      |     |   |  |  |  |  |
|                                    | A   | 0.1      | 0.0   | 99.9  | 0.0   | 0.0   | 0.0   | 0.0   | 0.0   | 0.0   | 0.0   | 0.1   | 0.0   | 0.0   | 9.8  | 0.1   | 0.1   | 0.0   | 99.6  | 10.5 | 99.6 | 0.1   | 10.5 | 0.1   |      |     |   |  |  |  |  |
|                                    | C   | 99.2     | 99.1  | 0.0   | 0.0   | 0.0   | 99.4  | 0.0   | 0.0   | 99.5  | 0.1   | 0.0   | 99.4  | 0.0   | 0.1  | 98.4  | 0.1   | 99.0  | 0.0   | 0.2  | 0.0  | 91.7  | 0.1  | 0.0   |      |     |   |  |  |  |  |
|                                    | G   | 0.0      | 0.0   | 0.0   | 0.0   | 0.0   | 0.0   | 0.0   | 0.0   | 0.0   | 0.0   | 0.0   | 0.0   | 0.0   | 89.6 | 0.1   | 0.0   | 0.0   | 0.0   | 88.4 | 0.0  | 0.5   | 88.8 | 0.0   |      |     |   |  |  |  |  |
|                                    | T   | 0.7      | 0.8   | 0.0   | 99.9  | 99.8  | 0.3   | 99.8  | 99.7  | 0.3   | 99.6  | 99.6  | 0.1   | 99.5  | 0.1  | 1.0   | 99.4  | 0.5   | 0.0   | 0.6  | 0.0  | 7.2   | 0.1  | 99.4  | 0.0  |     |   |  |  |  |  |
| -                                  | 0.0 | 0.1      | 0.1   | 0.1   | 0.1   | 0.2   | 0.2   | 0.4   | 0.4   | 0.5   | 0.5   | 0.6   | 0.8   | 0.6   | 0.7  | 0.7   | 0.8   | 0.7   | 0.8   | 0.7  | 0.8  | 0.7   | 0.5  | 0.4   |      |     |   |  |  |  |  |
| AID-seBEmax<br>Replicate 2         |     | C        | C     | A     | T     | T     | C     | T     | T     | C     | T     | T     | C     | T     | G    | C     | T     | C     | A     | G    | A    | C     | G    | T     |      |     |   |  |  |  |  |
|                                    | A   | 0.0      | 0.0   | 99.8  | 0.0   | 0.0   | 0.0   | 0.0   | 0.0   | 0.0   | 0.0   | 0.1   | 0.0   | 0.0   | 15.9 | 0.0   | 0.0   | 0.0   | 99.0  | 17.1 | 99.0 | 0.4   | 17.3 | 0.1   |      |     |   |  |  |  |  |
|                                    | C   | 98.7     | 98.3  | 0.2   | 0.0   | 0.0   | 99.6  | 0.0   | 0.0   | 99.5  | 0.0   | 0.0   | 98.9  | 0.0   | 0.2  | 97.8  | 0.0   | 98.6  | 0.3   | 0.2  | 0.2  | 85.1  | 0.1  | 0.1   |      |     |   |  |  |  |  |
|                                    | G   | 0.1      | 0.0   | 0.0   | 0.0   | 0.0   | 0.0   | 0.0   | 0.0   | 0.0   | 0.0   | 0.0   | 0.0   | 0.0   | 83.1 | 0.2   | 0.0   | 0.1   | 0.0   | 81.1 | 0.0  | 0.6   | 81.6 | 0.1   |      |     |   |  |  |  |  |
|                                    | T   | 1.1      | 1.6   | 0.0   | 99.9  | 99.9  | 0.3   | 99.8  | 99.8  | 0.3   | 99.8  | 99.4  | 0.2   | 99.1  | 0.2  | 1.3   | 99.2  | 0.5   | 0.1   | 0.8  | 0.0  | 13.1  | 0.3  | 99.7  | 0.0  |     |   |  |  |  |  |
|                                    | -   | 0.0      | 0.0   | 0.0   | 0.0   | 0.1   | 0.1   | 0.1   | 0.1   | 0.2   | 0.3   | 0.4   | 0.5   | 0.6   | 0.8  | 0.6   | 0.7   | 0.7   | 0.8   | 0.7  | 0.8  | 0.7   | 0.8  | 0.7   | 0.5  |     |   |  |  |  |  |
| AID-seBEmax<br>Replicate 3         |     | C        | C     | A     | T     | T     | C     | T     | T     | C     | T     | T     | C     | T     | G    | C     | T     | C     | A     | G    | A    | C     | G    | T     |      |     |   |  |  |  |  |
|                                    | A   | 0.0      | 0.1   | 99.7  | 0.0   | 0.0   | 0.1   | 0.0   | 0.0   | 0.1   | 0.0   | 0.1   | 0.1   | 0.0   | 12.6 | 0.0   | 0.0   | 0.1   | 99.1  | 13.7 | 99.2 | 0.3   | 13.7 | 0.0   |      |     |   |  |  |  |  |
|                                    | C   | 98.7     | 98.3  | 0.1   | 0.0   | 0.0   | 99.5  | 0.0   | 0.0   | 99.3  | 0.1   | 0.0   | 99.1  | 0.0   | 0.1  | 98.4  | 0.0   | 98.7  | 0.2   | 0.2  | 0.2  | 89.0  | 0.1  | 0.0   |      |     |   |  |  |  |  |
|                                    | G   | 0.0      | 0.0   | 0.0   | 0.0   | 0.0   | 0.0   | 0.0   | 0.0   | 0.0   | 0.0   | 0.0   | 0.0   | 0.0   | 86.5 | 0.1   | 0.0   | 0.1   | 0.0   | 85.3 | 0.0  | 0.3   | 85.4 | 0.1   |      |     |   |  |  |  |  |
|                                    | T   | 1.1      | 1.5   | 0.0   | 99.8  | 99.8  | 0.3   | 99.7  | 99.6  | 0.2   | 99.5  | 99.4  | 0.2   | 99.4  | 0.2  | 0.9   | 99.3  | 0.5   | 0.0   | 0.3  | 0.0  | 9.7   | 0.2  | 99.4  | 0.0  |     |   |  |  |  |  |
|                                    | -   | 0.1      | 0.1   | 0.1   | 0.2   | 0.2   | 0.2   | 0.2   | 0.4   | 0.4   | 0.5   | 0.5   | 0.6   | 0.6   | 0.5  | 0.6   | 0.7   | 0.6   | 0.6   | 0.5  | 0.6  | 0.7   | 0.6  | 0.5   | 0.0  |     |   |  |  |  |  |
| AID-seBE-IREs<br>+Rap Replicate 1  |     | PAM      |       |       |       |       | 20    |       |       |       |       | 15    |       |       |      |       | 10    |       |       |      |      | 5     |      |       |      |     | 1 |  |  |  |  |
|                                    |     | C        | C     | A     | T     | T     | C     | T     | T     | C     | T     | T     | C     | T     | G    | C     | T     | C     | A     | G    | A    | C     | G    | T     |      |     |   |  |  |  |  |
|                                    | A   | 0.0      | 0.0   | 99.9  | 0.0   | 0.0   | 0.0   | 0.0   | 0.0   | 0.0   | 0.0   | 0.0   | 0.0   | 0.0   | 3.6  | 0.0   | 0.0   | 0.0   | 99.6  | 4.6  | 99.6 | 0.0   | 4.7  | 0.0   |      |     |   |  |  |  |  |
|                                    | C   | 99.9     | 99.9  | 0.1   | 0.0   | 0.0   | 100.0 | 0.0   | 0.0   | 99.9  | 0.0   | 0.0   | 99.8  | 0.0   | 0.0  | 99.8  | 0.0   | 99.7  | 0.2   | 0.1  | 0.2  | 97.4  | 0.0  | 0.1   |      |     |   |  |  |  |  |
|                                    | G   | 0.0      | 0.0   | 0.0   | 0.0   | 0.0   | 0.0   | 0.0   | 0.0   | 0.0   | 0.0   | 0.0   | 0.0   | 0.0   | 96.1 | 0.0   | 0.0   | 0.0   | 0.0   | 94.8 | 0.0  | 0.1   | 95.0 | 0.0   |      |     |   |  |  |  |  |
|                                    | T   | 0.1      | 0.1   | 0.0   | 100.0 | 100.0 | 0.0   | 100.0 | 100.0 | 0.0   | 99.9  | 99.9  | 0.0   | 99.8  | 0.0  | 0.0   | 99.8  | 0.1   | 0.0   | 0.3  | 0.0  | 2.2   | 0.0  | 99.7  | 0.0  |     |   |  |  |  |  |
| -                                  | 0.0 | 0.0      | 0.0   | 0.0   | 0.0   | 0.0   | 0.0   | 0.0   | 0.0   | 0.1   | 0.1   | 0.1   | 0.1   | 0.2   | 0.2  | 0.2   | 0.2   | 0.1   | 0.2   | 0.2  | 0.2  | 0.2   | 0.2  | 0.2   |      |     |   |  |  |  |  |
| AID-seBE-IREs<br>+Rap Replicate 2  |     | C        | C     | A     | T     | T     | C     | T     | T     | C     | T     | T     | C     | T     | G    | C     | T     | C     | A     | G    | A    | C     | G    | T     |      |     |   |  |  |  |  |
|                                    | A   | 0.0      | 0.0   | 99.9  | 0.0   | 0.0   | 0.0   | 0.0   | 0.0   | 0.0   | 0.0   | 0.0   | 0.0   | 0.0   | 3.8  | 0.0   | 0.0   | 0.0   | 99.9  | 4.9  | 99.9 | 0.1   | 5.1  | 0.0   |      |     |   |  |  |  |  |
|                                    | C   | 99.8     | 99.8  | 0.0   | 0.0   | 0.0   | 99.9  | 0.0   | 0.0   | 99.8  | 0.0   | 0.0   | 99.6  | 0.0   | 0.0  | 99.8  | 0.0   | 99.9  | 0.0   | 0.1  | 0.0  | 97.1  | 0.0  | 0.1   |      |     |   |  |  |  |  |
|                                    | G   | 0.0      | 0.0   | 0.0   | 0.0   | 0.0   | 0.0   | 0.0   | 0.0   | 0.0   | 0.0   | 0.0   | 0.0   | 0.0   | 95.9 | 0.0   | 0.0   | 0.0   | 0.0   | 94.7 | 0.0  | 0.1   | 94.8 | 0.0   |      |     |   |  |  |  |  |
|                                    | T   | 0.1      | 0.2   | 0.0   | 99.9  | 99.9  | 0.0   | 99.9  | 99.9  | 0.0   | 99.8  | 99.7  | 0.0   | 99.7  | 0.1  | 0.1   | 99.8  | 0.0   | 0.0   | 0.3  | 0.0  | 2.6   | 0.0  | 99.8  | 0.0  |     |   |  |  |  |  |
|                                    | -   | 0.0      | 0.0   | 0.0   | 0.0   | 0.0   | 0.0   | 0.0   | 0.1   | 0.1   | 0.1   | 0.1   | 0.2   | 0.3   | 0.3  | 0.1   | 0.1   | 0.1   | 0.1   | 0.1  | 0.1  | 0.1   | 0.1  | 0.1   | 0.1  |     |   |  |  |  |  |
| AID-seBE-IREs<br>+Rap Replicate 3  |     | C        | C     | A     | T     | T     | C     | T     | T     | C     | T     | T     | C     | T     | G    | C     | T     | C     | A     | G    | A    | C     | G    | T     |      |     |   |  |  |  |  |
|                                    | A   | 0.0      | 0.0   | 99.9  | 0.0   | 0.0   | 0.0   | 0.0   | 0.0   | 0.0   | 0.0   | 0.0   | 0.0   | 0.0   | 3.2  | 0.0   | 0.0   | 0.0   | 99.6  | 4.1  | 99.7 | 0.0   | 4.0  | 0.0   |      |     |   |  |  |  |  |
|                                    | C   | 99.9     | 99.9  | 0.1   | 0.0   | 0.0   | 99.8  | 0.0   | 0.0   | 99.8  | 0.0   | 0.0   | 99.8  | 0.0   | 0.0  | 99.8  | 0.0   | 99.7  | 0.1   | 0.0  | 0.1  | 97.4  | 0.0  | 0.0   |      |     |   |  |  |  |  |
|                                    | G   | 0.0      | 0.0   | 0.0   | 0.0   | 0.0   | 0.0   | 0.0   | 0.0   | 0.0   | 0.0   | 0.0   | 0.0   | 0.0   | 96.4 | 0.0   | 0.0   | 0.0   | 0.0   | 95.4 | 0.0  | 0.1   | 95.7 | 0.0   |      |     |   |  |  |  |  |
|                                    | T   | 0.0      | 0.1   | 0.0   | 99.9  | 99.9  | 0.0   | 99.9  | 99.8  | 0.0   | 99.8  | 99.8  | 0.0   | 99.8  | 0.1  | 0.0   | 99.8  | 0.0   | 0.0   | 0.3  | 0.0  | 2.2   | 0.1  | 99.8  | 0.0  |     |   |  |  |  |  |
|                                    | -   | 0.0      | 0.1   | 0.1   | 0.1   | 0.1   | 0.1   | 0.1   | 0.1   | 0.1   | 0.1   | 0.2   | 0.2   | 0.2   | 0.3  | 0.2   | 0.2   | 0.2   | 0.2   | 0.2  | 0.2  | 0.2   | 0.2  | 0.2   | 0.2  |     |   |  |  |  |  |
| AID-seBE-IREs<br>NoRap Replicate 1 |     | PAM      |       |       |       |       | 20    |       |       |       |       | 15    |       |       |      |       | 10    |       |       |      |      | 5     |      |       |      |     | 1 |  |  |  |  |
|                                    |     | C        | C     | A     | T     | T     | C     | T     | T     | C     | T     | T     | C     | T     | G    | C     | T     | C     | A     | G    | A    | C     | G    | T     |      |     |   |  |  |  |  |
|                                    | A   | 0.0      | 0.0   | 100.0 | 0.0   | 0.0   | 0.0   | 0.0   | 0.0   | 0.0   | 0.0   | 0.0   | 0.1   | 0.0   | 0.1  | 0.0   | 0.0   | 0.0   | 99.9  | 0.1  | 99.9 | 0.0   | 0.1  | 0.0   |      |     |   |  |  |  |  |
|                                    | C   | 100.0    | 99.9  | 0.0   | 0.0   | 0.0   | 100.0 | 0.1   | 0.0   | 100.0 | 0.0   | 0.0   | 99.9  | 0.0   | 0.0  | 100.0 | 0.0   | 100.0 | 0.1   | 0.0  | 0.1  | 99.9  | 0.0  | 0.1   |      |     |   |  |  |  |  |
|                                    | G   | 0.0      | 0.0   | 0.0   | 0.0   | 0.0   | 0.0   | 0.0   | 0.0   | 0.0   | 0.0   | 0.0   | 0.0   | 0.0   | 99.8 | 0.0   | 0.0   | 0.0   | 0.0   | 99.6 | 0.0  | 0.0   | 99.9 | 0.0   |      |     |   |  |  |  |  |
|                                    | T   | 0.0      | 0.0   | 0.0   | 100.0 | 100.0 | 0.0   | 99.9  | 100.0 | 0.0   | 100.0 | 99.9  | 0.0   | 100.0 | 0.1  | 0.0   | 100.0 | 0.0   | 0.0   | 0.3  | 0.0  | 0.1   | 0.0  | 99.9  | 0.0  |     |   |  |  |  |  |
| -                                  | 0.0 | 0.0      | 0.0   | 0.0   | 0.0   | 0.0   | 0.0   | 0.0   | 0.0   | 0.0   | 0.0   | 0.0   | 0.0   | 0.0   | 0.0  | 0.0   | 0.0   | 0.0   | 0.0   | 0.0  | 0.0  | 0.0   | 0.0  | 0.0   |      |     |   |  |  |  |  |
| AID-seBE-IREs<br>NoRap Replicate 2 |     | C        | C     | A     | T     | T     | C     | T     | T     | C     | T     | T     | C     | T     | G    | C     | T     | C     | A     | G    | A    | C     | G    | T     |      |     |   |  |  |  |  |
|                                    | A   | 0.0      | 0.0   | 100.0 | 0.0   | 0.0   | 0.0   | 0.0   | 0.0   | 0.0   | 0.0   | 0.0   | 0.0   | 0.0   | 0.0  | 0.0   | 0.0   | 0.0   | 100.0 | 0.0  | 99.9 | 0.0   | 0.0  | 0.0   |      |     |   |  |  |  |  |
|                                    | C   | 100.0    | 100.0 | 0.0   | 0.0   | 0.1   | 100.0 | 0.0   | 0.0   | 100.0 | 0.0   | 0.0   | 100.0 | 0.0   | 0.0  | 100.0 | 0.0   | 100.0 | 0.0   | 0.0  | 0.0  | 99.9  | 0.0  | 0.0   |      |     |   |  |  |  |  |
|                                    | G   | 0.0      | 0.0   | 0.0   | 0.0   | 0.0   | 0.0   | 0.0   | 0.0   | 0.0   | 0.0   | 0.0   | 0.0   | 0.0   | 0.0  | 99.9  | 0.0   | 0.0   | 0.0   | 99.6 | 0.0  | 0.0   | 99.9 | 0.0   |      |     |   |  |  |  |  |
|                                    | T   | 0.0      | 0.0   | 0.0   | 100.0 | 99.9  | 0.0   | 100.0 | 100.0 | 0.0   | 100.0 | 100.0 | 0.0   | 100.0 | 0.1  | 0.0   | 100.0 | 0.0   | 0.0   | 0.4  | 0.0  | 0.1   | 0.0  | 100.0 | 0.0  |     |   |  |  |  |  |
|                                    | -   | 0.0      | 0.0   | 0.0   | 0.0   | 0.0   | 0.0   | 0.0   | 0.0   | 0.0   | 0.0   | 0.0   | 0.0   | 0.0   | 0.0  | 0.0   | 0.0   | 0.0   | 0.0   | 0.0  | 0.0  | 0.0   | 0.0  | 0.0   | 0.0  |     |   |  |  |  |  |
| AID-seBE-IREs<br>NoRap Replicate 3 |     | C        | C     | A     | T     | T     | C     | T     | T     | C     | T     | T     | C     | T     | G    | C     | T     | C     | A     | G    | A    | C     | G    | T     |      |     |   |  |  |  |  |
|                                    | A   | 0.0      | 0.0   | 99.9  | 0.0   | 0.0   | 0.0   | 0.0   | 0.0   | 0.0   | 0.0   | 0.0   | 0.0   | 0.1   | 0.0  | 0.0   | 0.0   | 0.0   | 99.7  | 0.1  | 99.7 | 0.0   | 0.1  | 0.0   |      |     |   |  |  |  |  |
|                                    | C   | 100.0    | 99.9  | 0.1   | 0.0   | 0.0   | 100.0 | 0.0   | 0.0   | 100.0 | 0.0   | 0.0   | 100.0 | 0.0   | 0.0  | 100.0 | 0.0   | 100.0 | 0.3   | 0.0  | 0.3  | 99.9  | 0.0  | 0.0   |      |     |   |  |  |  |  |
|                                    | G   | 0.0      | 0.0   | 0.0   | 0.0   | 0.0   | 0.0   | 0.0   | 0.0   | 0.0   | 0.0   | 0.0   | 0.0   | 0.0   | 99.8 | 0.0   | 0.0   | 0.0   | 0.0   | 99.5 | 0.0  | 0.0   | 99.9 | 0.0   |      |     |   |  |  |  |  |
|                                    | T   | 0.0      | 0.1   | 0.0   | 100.0 | 100.0 | 0.0   | 100.0 | 100.0 | 0.0   | 100.0 | 100.0 | 0.0   | 100.0 | 0.1  | 0.0   | 100.0 | 0.0   | 0.0   | 0.4  | 0.0  | 0.1   | 0.0  | 99.9  | 0.0  |     |   |  |  |  |  |
|                                    | -   | 0.0      | 0.0   | 0.0   | 0.0   | 0.0   | 0.0   | 0.0   | 0.0   | 0.0   | 0.0   | 0.0   | 0.0   | 0.0   | 0.0  | 0.0   | 0.0   | 0.0   | 0.0   | 0.0  | 0.0  | 0.0   | 0.0  | 0.0   | 0.0  |     |   |  |  |  |  |

**Supplementary Figure 4. R-loop assay to examine sgRNA-independent off-target activity.** The on-target activity at EMX1 and sg-RNA independent off-target activity at the dSaCas9-site is provided. The frequency of individual base calls at each locus of interest are shown, colored using a heat map from white (0%) to red (100%). The parent sequence is shown with PAM (yellow) and sgRNA proto-spacer (black) noted, with the SpCas9 NGG PAM for EMX1 and the NNGRRT for the dSaCas9 targeting site. The PAM is at right, with the coding strand cytosine (C) targeted for mutation is highlighted in red. The data in Fig. 4c and Extended Data Fig. 4d show the quantification of conversion at the listed base only. Results across each locus and with individual replicates are shown using untreated cells (n = 1), along with intact BE4max or seBE-IRES constructs with or without rapamycin (n = 3 each). The loci analyzed are the validated EMX1 targeting site with (a) evoA1, (b) AID' or (c) A3A editors or the dSaCas9 site with (d) evoA1, (e) AID' or (f) A3A editors.

Supplementary Figure 4

**a** *AID constructs, EMXI on-target*

|           |   | E225 |      | S226 |      | E227 |      | Q228 |     | K229 |      | K230 |      | K231 |     |      |      |     |      |      |     |      |      |
|-----------|---|------|------|------|------|------|------|------|-----|------|------|------|------|------|-----|------|------|-----|------|------|-----|------|------|
|           |   | G    | A    | G    | T    | C    | C    | G    | A   | G    | C    | A    | G    | A    | A   | G    | A    | A   | G    | G    | G   | G    |      |
| untreated | A | 0.0  | 99.9 | 0.0  | 0.0  | 0.0  | 0.0  | 0.0  | 0.0 | 99.9 | 0.0  | 0.0  | 99.7 | 99.9 | 0.0 | 99.9 | 99.9 | 0.0 | 99.4 | 99.6 | 0.0 | 0.0  |      |
|           | C | 0.0  | 0.0  | 0.0  | 0.0  | 99.8 | 99.8 | 0.0  | 0.0 | 0.0  | 99.8 | 0.0  | 0.0  | 0.1  | 0.0 | 0.0  | 0.0  | 0.0 | 0.0  | 0.0  | 0.0 | 0.0  |      |
|           | G | 99.9 | 0.0  | 99.8 | 0.1  | 0.0  | 0.0  | 99.8 | 0.0 | 99.9 | 0.1  | 0.1  | 99.9 | 0.1  | 0.1 | 99.7 | 0.0  | 0.0 | 99.5 | 0.1  | 0.0 | 99.8 | 99.8 |
|           | T | 0.0  | 0.0  | 0.1  | 99.7 | 0.2  | 0.1  | 0.1  | 0.0 | 0.1  | 0.1  | 0.0  | 0.0  | 0.0  | 0.2 | 0.0  | 0.0  | 0.1 | 0.1  | 0.0  | 0.1 | 0.1  | 0.1  |
|           | - | 0.0  | 0.0  | 0.0  | 0.0  | 0.0  | 0.0  | 0.0  | 0.0 | 0.0  | 0.0  | 0.0  | 0.0  | 0.0  | 0.0 | 0.0  | 0.4  | 0.4 | 0.4  | 0.0  | 0.0 | 0.0  | 0.0  |

  

|                                        |   | 1    |      | 5    |      | 10   |      | 15   |      | 20 PAM |      |      |      |      |      |      |      |      |      |      |      |      |      |
|----------------------------------------|---|------|------|------|------|------|------|------|------|--------|------|------|------|------|------|------|------|------|------|------|------|------|------|
|                                        |   | G    | A    | G    | T    | C    | C    | G    | A    | G      | C    | A    | G    | A    | A    | G    | A    | A    | G    | G    | G    | G    |      |
| AID-seBE <sup>max</sup><br>Replicate 1 | A | 0.3  | 99.3 | 0.4  | 0.1  | 0.6  | 0.2  | 0.1  | 99.3 | 0.2    | 0.4  | 99.3 | 0.1  | 99.5 | 99.5 | 0.1  | 99.6 | 99.6 | 0.1  | 99.4 | 99.5 | 0.1  | 0.1  |
|                                        | C | 0.0  | 0.0  | 0.0  | 0.0  | 78.0 | 84.0 | 0.0  | 0.1  | 0.0    | 77.7 | 0.0  | 0.0  | 0.0  | 0.0  | 0.0  | 0.0  | 0.0  | 0.0  | 0.0  | 0.0  | 0.0  |      |
|                                        | G | 99.0 | 0.1  | 98.9 | 0.2  | 0.1  | 0.0  | 99.2 | 0.0  | 99.1   | 0.3  | 0.0  | 99.2 | 0.0  | 0.1  | 99.4 | 0.0  | 0.0  | 99.5 | 0.0  | 0.0  | 99.3 | 99.6 |
|                                        | T | 0.2  | 0.0  | 0.1  | 99.1 | 20.8 | 15.2 | 0.1  | 0.0  | 0.1    | 21.0 | 0.0  | 0.1  | 0.0  | 0.0  | 0.1  | 0.0  | 0.0  | 0.1  | 0.1  | 0.0  | 0.2  | 0.1  |
|                                        | - | 0.5  | 0.6  | 0.6  | 0.6  | 0.6  | 0.6  | 0.6  | 0.6  | 0.6    | 0.6  | 0.5  | 0.5  | 0.4  | 0.4  | 0.4  | 0.3  | 0.3  | 0.3  | 0.4  | 0.4  | 0.4  | 0.1  |

  

|                                        |   | 1    |      | 5    |      | 10   |      | 15   |      | 20 PAM |      |      |      |      |      |      |      |      |      |      |      |      |      |
|----------------------------------------|---|------|------|------|------|------|------|------|------|--------|------|------|------|------|------|------|------|------|------|------|------|------|------|
|                                        |   | G    | A    | G    | T    | C    | C    | G    | A    | G      | C    | A    | G    | A    | A    | G    | A    | A    | G    | G    | G    | G    |      |
| AID-seBE <sup>max</sup><br>Replicate 2 | A | 0.2  | 99.4 | 0.3  | 0.0  | 0.3  | 0.1  | 0.1  | 99.4 | 0.1    | 0.2  | 99.5 | 0.0  | 99.6 | 99.6 | 0.0  | 99.7 | 99.7 | 0.0  | 99.5 | 99.5 | 0.0  | 0.0  |
|                                        | C | 0.0  | 0.1  | 0.0  | 0.0  | 82.1 | 87.2 | 0.0  | 0.0  | 0.0    | 82.0 | 0.0  | 0.0  | 0.0  | 0.0  | 0.0  | 0.0  | 0.0  | 0.0  | 0.0  | 0.0  | 0.0  |      |
|                                        | G | 99.2 | 0.0  | 99.1 | 0.2  | 0.1  | 0.0  | 99.3 | 0.0  | 99.4   | 0.2  | 0.0  | 99.4 | 0.0  | 0.0  | 99.6 | 0.0  | 0.0  | 99.7 | 0.0  | 0.1  | 99.5 | 99.7 |
|                                        | T | 0.1  | 0.0  | 0.1  | 99.3 | 17.1 | 12.1 | 0.1  | 0.0  | 0.0    | 17.0 | 0.0  | 0.1  | 0.0  | 0.0  | 0.1  | 0.0  | 0.1  | 0.1  | 0.0  | 0.0  | 0.2  | 0.1  |
|                                        | - | 0.5  | 0.5  | 0.5  | 0.5  | 0.5  | 0.5  | 0.5  | 0.5  | 0.5    | 0.5  | 0.4  | 0.4  | 0.4  | 0.3  | 0.3  | 0.2  | 0.2  | 0.2  | 0.4  | 0.4  | 0.4  | 0.1  |

  

|                                        |   | 1    |      | 5    |      | 10   |      | 15   |      | 20 PAM |      |      |      |      |      |      |      |      |      |      |      |      |      |
|----------------------------------------|---|------|------|------|------|------|------|------|------|--------|------|------|------|------|------|------|------|------|------|------|------|------|------|
|                                        |   | G    | A    | G    | T    | C    | C    | G    | A    | G      | C    | A    | G    | A    | A    | G    | A    | A    | G    | G    | G    | G    |      |
| AID-seBE <sup>max</sup><br>Replicate 3 | A | 0.8  | 99.1 | 1.2  | 0.1  | 1.4  | 0.5  | 0.1  | 99.2 | 0.4    | 0.5  | 99.1 | 0.2  | 99.2 | 99.3 | 0.2  | 99.6 | 99.5 | 0.1  | 99.4 | 99.5 | 0.2  | 0.1  |
|                                        | C | 0.0  | 0.0  | 0.0  | 0.1  | 59.5 | 69.4 | 0.1  | 0.1  | 0.0    | 59.8 | 0.0  | 0.0  | 0.0  | 0.0  | 0.0  | 0.0  | 0.0  | 0.0  | 0.0  | 0.0  | 0.0  |      |
|                                        | G | 98.4 | 0.1  | 97.9 | 0.2  | 0.4  | 0.2  | 98.8 | 0.0  | 98.6   | 0.6  | 0.1  | 99.1 | 0.1  | 0.2  | 99.1 | 0.1  | 0.1  | 99.3 | 0.1  | 0.1  | 98.9 | 99.2 |
|                                        | T | 0.3  | 0.2  | 0.4  | 99.1 | 38.1 | 29.2 | 0.4  | 0.1  | 0.3    | 38.4 | 0.1  | 0.1  | 0.1  | 0.1  | 0.3  | 0.0  | 0.1  | 0.3  | 0.2  | 0.0  | 0.5  | 0.6  |
|                                        | - | 0.6  | 0.6  | 0.6  | 0.6  | 0.7  | 0.7  | 0.6  | 0.7  | 0.7    | 0.7  | 0.6  | 0.6  | 0.5  | 0.5  | 0.4  | 0.3  | 0.2  | 0.2  | 0.4  | 0.3  | 0.3  | 0.1  |

  

|                                   |   | 1    |      | 5    |      | 10   |      | 15   |      | 20 PAM |      |      |      |      |      |      |      |      |      |      |      |      |      |
|-----------------------------------|---|------|------|------|------|------|------|------|------|--------|------|------|------|------|------|------|------|------|------|------|------|------|------|
|                                   |   | G    | A    | G    | T    | C    | C    | G    | A    | G      | C    | A    | G    | A    | A    | G    | A    | A    | G    | G    | G    | G    |      |
| AID-seBE-IRE5<br>+Rap Replicate 1 | A | 0.0  | 99.7 | 0.1  | 0.0  | 0.2  | 0.1  | 0.0  | 99.7 | 0.0    | 0.1  | 99.7 | 0.0  | 99.8 | 99.8 | 0.0  | 99.8 | 99.9 | 0.0  | 99.8 | 99.8 | 0.0  | 0.1  |
|                                   | C | 0.0  | 0.0  | 0.0  | 0.0  | 83.0 | 87.2 | 0.0  | 0.1  | 0.0    | 82.7 | 0.0  | 0.0  | 0.0  | 0.0  | 0.0  | 0.0  | 0.0  | 0.0  | 0.0  | 0.0  | 0.0  |      |
|                                   | G | 99.7 | 0.1  | 99.7 | 0.2  | 0.1  | 0.0  | 99.7 | 0.0  | 99.7   | 0.1  | 0.0  | 99.7 | 0.0  | 0.0  | 99.8 | 0.0  | 0.0  | 99.8 | 0.0  | 0.0  | 99.6 | 99.8 |
|                                   | T | 0.1  | 0.0  | 0.1  | 99.6 | 16.5 | 12.4 | 0.1  | 0.0  | 0.0    | 16.8 | 0.0  | 0.1  | 0.0  | 0.0  | 0.1  | 0.0  | 0.0  | 0.1  | 0.0  | 0.0  | 0.2  | 0.1  |
|                                   | - | 0.1  | 0.1  | 0.1  | 0.1  | 0.2  | 0.2  | 0.2  | 0.2  | 0.2    | 0.2  | 0.2  | 0.2  | 0.2  | 0.1  | 0.1  | 0.1  | 0.1  | 0.1  | 0.2  | 0.2  | 0.2  | 0.1  |

  

|                                   |   | 1    |      | 5    |      | 10   |      | 15   |      | 20 PAM |      |      |      |      |      |      |      |      |      |      |      |      |      |
|-----------------------------------|---|------|------|------|------|------|------|------|------|--------|------|------|------|------|------|------|------|------|------|------|------|------|------|
|                                   |   | G    | A    | G    | T    | C    | C    | G    | A    | G      | C    | A    | G    | A    | A    | G    | A    | A    | G    | G    | G    | G    |      |
| AID-seBE-IRE5<br>+Rap Replicate 2 | A | 0.0  | 99.8 | 0.1  | 0.1  | 0.1  | 0.2  | 0.0  | 99.8 | 0.0    | 0.2  | 99.8 | 0.0  | 99.8 | 99.8 | 0.0  | 99.8 | 99.9 | 0.0  | 99.7 | 99.7 | 0.0  | 0.1  |
|                                   | C | 0.0  | 0.0  | 0.0  | 0.1  | 86.2 | 89.7 | 0.0  | 0.0  | 0.0    | 86.0 | 0.0  | 0.0  | 0.0  | 0.0  | 0.0  | 0.0  | 0.0  | 0.0  | 0.0  | 0.0  | 0.0  |      |
|                                   | G | 99.7 | 0.0  | 99.7 | 0.2  | 0.1  | 0.0  | 99.6 | 0.0  | 99.8   | 0.1  | 0.0  | 99.7 | 0.0  | 0.0  | 99.8 | 0.0  | 0.0  | 99.8 | 0.0  | 0.0  | 99.6 | 99.7 |
|                                   | T | 0.1  | 0.0  | 0.1  | 99.6 | 13.5 | 10.0 | 0.2  | 0.0  | 0.1    | 13.6 | 0.0  | 0.1  | 0.0  | 0.0  | 0.1  | 0.0  | 0.0  | 0.1  | 0.0  | 0.0  | 0.1  | 0.2  |
|                                   | - | 0.1  | 0.1  | 0.1  | 0.1  | 0.1  | 0.1  | 0.1  | 0.1  | 0.1    | 0.1  | 0.1  | 0.1  | 0.1  | 0.1  | 0.1  | 0.1  | 0.1  | 0.1  | 0.2  | 0.2  | 0.2  | 0.1  |

  

|                                   |   | 1    |      | 5    |      | 10   |      | 15   |      | 20 PAM |      |      |      |      |      |      |      |      |      |      |      |      |      |
|-----------------------------------|---|------|------|------|------|------|------|------|------|--------|------|------|------|------|------|------|------|------|------|------|------|------|------|
|                                   |   | G    | A    | G    | T    | C    | C    | G    | A    | G      | C    | A    | G    | A    | A    | G    | A    | A    | G    | G    | G    | G    |      |
| AID-seBE-IRE5<br>+Rap Replicate 3 | A | 0.1  | 99.6 | 0.1  | 0.0  | 0.2  | 0.1  | 0.1  | 99.5 | 0.1    | 0.2  | 99.5 | 0.0  | 99.6 | 99.6 | 0.0  | 99.7 | 99.8 | 0.0  | 99.6 | 99.6 | 0.0  | 0.1  |
|                                   | C | 0.0  | 0.1  | 0.0  | 0.0  | 75.5 | 81.4 | 0.0  | 0.0  | 0.0    | 75.1 | 0.0  | 0.0  | 0.0  | 0.0  | 0.0  | 0.0  | 0.0  | 0.0  | 0.0  | 0.0  | 0.0  |      |
|                                   | G | 99.5 | 0.0  | 99.5 | 0.1  | 0.1  | 0.0  | 99.3 | 0.1  | 99.5   | 0.3  | 0.0  | 99.5 | 0.0  | 0.0  | 99.6 | 0.0  | 0.0  | 99.7 | 0.0  | 0.0  | 99.4 | 99.7 |
|                                   | T | 0.2  | 0.0  | 0.1  | 99.5 | 23.8 | 18.1 | 0.2  | 0.0  | 0.0    | 24.1 | 0.0  | 0.1  | 0.0  | 0.0  | 0.1  | 0.0  | 0.0  | 0.1  | 0.0  | 0.0  | 0.2  | 0.1  |
|                                   | - | 0.3  | 0.3  | 0.3  | 0.3  | 0.3  | 0.4  | 0.4  | 0.4  | 0.4    | 0.4  | 0.4  | 0.4  | 0.3  | 0.3  | 0.3  | 0.2  | 0.2  | 0.2  | 0.3  | 0.3  | 0.3  | 0.1  |

  

|                                    |   | 1    |      | 5    |      | 10   |      | 15   |      | 20 PAM |      |      |      |      |      |      |      |      |      |      |      |      |      |
|------------------------------------|---|------|------|------|------|------|------|------|------|--------|------|------|------|------|------|------|------|------|------|------|------|------|------|
|                                    |   | G    | A    | G    | T    | C    | C    | G    | A    | G      | C    | A    | G    | A    | A    | G    | A    | A    | G    | G    | G    | G    |      |
| AID-seBE-IRE5<br>NoRap Replicate 1 | A | 0.0  | 99.8 | 0.0  | 0.1  | 0.1  | 0.2  | 0.0  | 99.8 | 0.1    | 0.0  | 99.8 | 0.0  | 99.9 | 99.8 | 0.0  | 99.9 | 99.9 | 0.0  | 99.7 | 99.7 | 0.0  | 0.1  |
|                                    | C | 0.0  | 0.0  | 0.0  | 0.0  | 99.5 | 99.5 | 0.0  | 0.1  | 0.0    | 99.5 | 0.1  | 0.0  | 0.0  | 0.0  | 0.0  | 0.0  | 0.0  | 0.0  | 0.0  | 0.0  | 0.0  |      |
|                                    | G | 99.8 | 0.1  | 99.8 | 0.4  | 0.0  | 0.0  | 99.7 | 0.1  | 99.8   | 0.0  | 0.0  | 99.8 | 0.0  | 0.1  | 99.8 | 0.0  | 0.0  | 99.8 | 0.0  | 0.0  | 99.6 | 99.7 |
|                                    | T | 0.2  | 0.0  | 0.1  | 99.5 | 0.4  | 0.3  | 0.2  | 0.0  | 0.1    | 0.4  | 0.1  | 0.2  | 0.0  | 0.1  | 0.1  | 0.0  | 0.0  | 0.1  | 0.1  | 0.0  | 0.3  | 0.2  |
|                                    | - | 0.0  | 0.0  | 0.0  | 0.0  | 0.0  | 0.0  | 0.0  | 0.0  | 0.0    | 0.0  | 0.0  | 0.0  | 0.0  | 0.0  | 0.0  | 0.0  | 0.0  | 0.0  | 0.1  | 0.1  | 0.1  | 0.1  |

  

|                                    |   | 1    |      | 5    |      | 10   |      | 15   |      | 20 PAM |      |      |      |      |      |      |      |      |      |      |      |      |      |
|------------------------------------|---|------|------|------|------|------|------|------|------|--------|------|------|------|------|------|------|------|------|------|------|------|------|------|
|                                    |   | G    | A    | G    | T    | C    | C    | G    | A    | G      | C    | A    | G    | A    | A    | G    | A    | A    | G    | G    | G    | G    |      |
| AID-seBE-IRE5<br>NoRap Replicate 2 | A | 0.0  | 99.9 | 0.0  | 0.0  | 0.1  | 0.1  | 0.0  | 99.8 | 0.1    | 0.1  | 99.9 | 0.0  | 99.9 | 99.9 | 0.0  | 99.9 | 99.9 | 0.0  | 99.7 | 99.7 | 0.0  | 0.0  |
|                                    | C | 0.0  | 0.0  | 0.0  | 0.1  | 99.6 | 99.5 | 0.0  | 0.1  | 0.0    | 99.6 | 0.0  | 0.0  | 0.0  | 0.0  | 0.0  | 0.0  | 0.0  | 0.0  | 0.0  | 0.0  | 0.0  |      |
|                                    | G | 99.8 | 0.1  | 99.8 | 0.2  | 0.0  | 0.0  | 99.8 | 0.0  | 99.8   | 0.0  | 0.0  | 99.9 | 0.0  | 0.0  | 99.9 | 0.0  | 0.0  | 99.9 | 0.0  | 0.0  | 99.5 | 99.8 |
|                                    | T | 0.2  | 0.0  | 0.1  | 99.7 | 0.3  | 0.3  | 0.1  | 0.0  | 0.0    | 0.3  | 0.0  | 0.1  | 0.0  | 0.0  | 0.1  | 0.0  | 0.0  | 0.1  | 0.1  | 0.0  | 0.3  | 0.2  |
|                                    | - | 0.0  | 0.0  | 0.0  | 0.0  | 0.0  | 0.0  | 0.0  | 0.0  | 0.0    | 0.0  | 0.0  | 0.0  | 0.0  | 0.0  | 0.0  | 0.0  | 0.0  | 0.0  | 0.2  | 0.2  | 0.2  | 0.1  |

  

|                                    |   | 1    |      | 5    |      | 10   |      | 15   |      | 20 PAM |      |      |      |      |      |      |      |      |      |      |      |      |      |
|------------------------------------|---|------|------|------|------|------|------|------|------|--------|------|------|------|------|------|------|------|------|------|------|------|------|------|
|                                    |   | G    | A    | G    | T    | C    | C    | G    | A    | G      | C    | A    | G    | A    | A    | G    | A    | A    | G    | G    | G    | G    |      |
| AID-seBE-IRE5<br>NoRap Replicate 3 | A | 0.0  | 99.8 | 0.0  | 0.1  | 0.1  | 0.1  | 0.0  | 99.8 | 0.0    | 0.0  | 99.9 | 0.0  | 99.9 | 99.9 | 0.0  | 99.9 | 99.9 | 0.0  | 99.9 | 99.8 | 0.0  | 0.1  |
|                                    | C | 0.0  | 0.0  | 0.0  | 0.0  | 98.4 | 98.5 | 0.0  | 0.1  | 0.0    | 98.5 | 0.0  | 0.0  | 0.0  | 0.0  | 0.0  | 0.0  | 0.0  | 0.0  | 0.0  | 0.0  | 0.0  |      |
|                                    | G | 99.9 | 0.1  | 99.9 | 0.2  | 0.0  | 0.0  | 99.8 | 0.1  | 99.9   | 0.0  | 0.0  | 99.9 | 0.0  | 0.0  | 99.9 | 0.0  | 0.0  | 99.9 | 0.0  | 0.0  | 99.6 | 99.8 |
|                                    | T | 0.1  | 0.0  | 0.1  | 99.7 | 1.5  | 1.4  | 0.1  | 0.0  | 0.0    | 1.5  | 0.0  | 0.1  | 0.0  | 0.0  | 0.1  | 0.0  | 0.0  | 0.1  | 0.0  | 0.0  | 0.3  | 0.1  |
|                                    | - | 0.0  | 0.0  | 0.0  | 0.0  | 0.0  | 0.0  | 0.0  | 0.0  | 0.0    | 0.0  | 0.0  | 0.0  | 0.0  | 0.0  | 0.0  | 0.0  | 0.0  | 0.0  | 0.1  | 0.1  | 0.1  | 0.1  |

# Supplementary Figure 4

| <b>b</b>  |   | <b><i>evoA1 constructs, EMXI on-target</i></b> |      |      |      |      |      |      |      |      |      |      |      |      |      |      |      |      |      |      |      |      |
|-----------|---|------------------------------------------------|------|------|------|------|------|------|------|------|------|------|------|------|------|------|------|------|------|------|------|------|
|           |   | E225                                           |      |      | S226 |      |      | E227 |      |      | Q228 |      |      | K229 |      |      | K230 |      |      | K231 |      |      |
|           |   | G                                              | A    | G    | T    | C    | C    | G    | A    | G    | C    | A    | G    | A    | A    | G    | A    | A    | G    | A    | A    | G    |
| untreated | A | 0.0                                            | 99.9 | 0.0  | 0.0  | 0.0  | 0.0  | 0.0  | 99.9 | 0.0  | 0.0  | 99.8 | 0.0  | 99.7 | 99.9 | 0.0  | 99.9 | 99.9 | 0.0  | 99.4 | 99.6 | 0.0  |
|           | C | 0.0                                            | 0.0  | 0.0  | 0.0  | 99.8 | 99.8 | 0.0  | 0.0  | 0.0  | 99.8 | 0.0  | 0.0  | 0.0  | 0.1  | 0.0  | 0.0  | 0.0  | 0.0  | 0.0  | 0.0  | 0.0  |
|           | G | 99.9                                           | 0.0  | 99.8 | 0.1  | 0.0  | 0.0  | 99.8 | 0.0  | 99.9 | 0.1  | 0.1  | 99.9 | 0.1  | 0.1  | 99.7 | 0.0  | 0.0  | 99.5 | 0.1  | 0.0  | 99.8 |
|           | T | 0.0                                            | 0.0  | 0.1  | 99.7 | 0.2  | 0.1  | 0.1  | 0.0  | 0.1  | 0.1  | 0.0  | 0.0  | 0.0  | 0.0  | 0.0  | 0.2  | 0.0  | 0.0  | 0.1  | 0.1  | 0.0  |
|           | - | 0.0                                            | 0.0  | 0.0  | 0.0  | 0.0  | 0.0  | 0.0  | 0.0  | 0.0  | 0.0  | 0.0  | 0.0  | 0.0  | 0.0  | 0.0  | 0.0  | 0.0  | 0.4  | 0.4  | 0.4  | 0.0  |

  

|                             |   | 1    |      |      | 5    |      |      | 10   |      |      | 15   |      |     | 20   |      |      | PAM  |      |      |      |      |      |
|-----------------------------|---|------|------|------|------|------|------|------|------|------|------|------|-----|------|------|------|------|------|------|------|------|------|
|                             |   | G    | A    | G    | T    | C    | C    | G    | A    | G    | C    | A    | G   | A    | A    | G    | A    | A    | G    | A    | A    | G    |
| evoA1-BE4max<br>Replicate 1 | A | 0.4  | 99.7 | 0.0  | 0.0  | 0.9  | 0.3  | 0.1  | 99.6 | 0.1  | 0.1  | 99.7 | 0.0 | 99.8 | 99.8 | 0.0  | 99.8 | 99.8 | 0.0  | 99.7 | 99.7 | 0.0  |
|                             | C | 0.1  | 0.0  | 0.0  | 0.1  | 55.7 | 56.9 | 0.0  | 0.0  | 0.0  | 95.3 | 0.0  | 0.0 | 0.0  | 0.0  | 0.0  | 0.0  | 0.0  | 0.0  | 0.0  | 0.0  | 0.0  |
|                             | G | 99.2 | 0.1  | 99.7 | 0.2  | 1.6  | 0.5  | 99.6 | 0.0  | 99.6 | 0.0  | 99.7 | 0.0 | 99.7 | 0.0  | 99.8 | 0.0  | 0.0  | 99.8 | 0.0  | 0.1  | 99.6 |
|                             | T | 0.1  | 0.0  | 0.1  | 99.5 | 41.5 | 41.9 | 0.1  | 0.0  | 0.0  | 4.2  | 0.0  | 0.1 | 0.0  | 0.0  | 0.0  | 0.0  | 0.0  | 0.0  | 0.1  | 0.0  | 0.2  |
|                             | - | 0.2  | 0.2  | 0.2  | 0.3  | 0.3  | 0.4  | 0.3  | 0.3  | 0.3  | 0.3  | 0.3  | 0.3 | 0.2  | 0.2  | 0.1  | 0.1  | 0.1  | 0.1  | 0.2  | 0.2  | 0.2  |

  

|                             |   | G    | A    | G    | T    | C    | C    | G    | A    | G    | C    | A    | G    | A    | A    | G    | A    | A    | G    | A    | A    | G    |
|-----------------------------|---|------|------|------|------|------|------|------|------|------|------|------|------|------|------|------|------|------|------|------|------|------|
| evoA1-BE4max<br>Replicate 2 | A | 0.3  | 99.6 | 0.0  | 0.0  | 0.5  | 0.3  | 0.0  | 99.7 | 0.0  | 0.1  | 99.7 | 0.0  | 99.8 | 99.8 | 0.0  | 99.8 | 99.9 | 0.0  | 99.7 | 99.7 | 0.0  |
|                             | C | 0.0  | 0.0  | 0.0  | 0.0  | 63.2 | 63.8 | 0.0  | 0.0  | 0.0  | 95.8 | 0.0  | 0.0  | 0.0  | 0.0  | 0.0  | 0.0  | 0.0  | 0.0  | 0.0  | 0.0  | 0.0  |
|                             | G | 99.3 | 0.1  | 99.7 | 0.2  | 1.4  | 0.2  | 99.6 | 0.0  | 99.7 | 0.1  | 0.0  | 99.7 | 0.0  | 0.0  | 99.7 | 0.0  | 0.0  | 99.8 | 0.0  | 0.1  | 99.6 |
|                             | T | 0.2  | 0.0  | 0.1  | 99.5 | 34.7 | 35.4 | 0.1  | 0.0  | 0.1  | 3.7  | 0.1  | 0.1  | 0.0  | 0.1  | 0.0  | 0.1  | 0.0  | 0.1  | 0.1  | 0.0  | 0.2  |
|                             | - | 0.3  | 0.2  | 0.3  | 0.2  | 0.2  | 0.3  | 0.2  | 0.2  | 0.2  | 0.3  | 0.2  | 0.2  | 0.2  | 0.2  | 0.2  | 0.1  | 0.1  | 0.1  | 0.1  | 0.2  | 0.2  |

  

|                             |   | G    | A    | G    | T    | C    | C    | G    | A    | G    | C    | A    | G    | A    | A    | G    | A    | A    | G    | A    | A    | G    |
|-----------------------------|---|------|------|------|------|------|------|------|------|------|------|------|------|------|------|------|------|------|------|------|------|------|
| evoA1-BE4max<br>Replicate 3 | A | 0.5  | 99.8 | 0.0  | 0.0  | 0.7  | 0.4  | 0.1  | 99.7 | 0.1  | 0.1  | 99.7 | 0.0  | 99.7 | 99.7 | 0.0  | 99.8 | 99.8 | 0.0  | 99.7 | 99.7 | 0.0  |
|                             | C | 0.0  | 0.0  | 0.0  | 0.0  | 45.2 | 46.3 | 0.0  | 0.0  | 0.0  | 92.5 | 0.0  | 0.0  | 0.0  | 0.0  | 0.0  | 0.0  | 0.0  | 0.0  | 0.0  | 0.0  | 0.0  |
|                             | G | 99.3 | 0.0  | 99.7 | 0.2  | 1.4  | 0.2  | 99.5 | 0.0  | 99.6 | 0.1  | 0.0  | 99.7 | 0.0  | 0.0  | 99.7 | 0.0  | 0.0  | 99.8 | 0.0  | 0.0  | 99.6 |
|                             | T | 0.1  | 0.0  | 0.1  | 99.6 | 52.5 | 52.9 | 0.1  | 0.0  | 0.1  | 7.1  | 0.0  | 0.1  | 0.0  | 0.1  | 0.0  | 0.0  | 0.1  | 0.0  | 0.1  | 0.0  | 0.2  |
|                             | - | 0.1  | 0.1  | 0.1  | 0.2  | 0.2  | 0.3  | 0.2  | 0.2  | 0.2  | 0.2  | 0.2  | 0.2  | 0.2  | 0.2  | 0.2  | 0.2  | 0.2  | 0.2  | 0.1  | 0.2  | 0.2  |

  

|                              |   | 1    |      |      | 5    |      |      | 10   |      |      | 15   |      |      | 20   |      |      | PAM  |      |      |      |      |      |
|------------------------------|---|------|------|------|------|------|------|------|------|------|------|------|------|------|------|------|------|------|------|------|------|------|
|                              |   | G    | A    | G    | T    | C    | C    | G    | A    | G    | C    | A    | G    | A    | A    | G    | A    | A    | G    | A    | A    | G    |
| evoA1-seBE-<br>IRES +Rep Rep | A | 0.1  | 99.8 | 0.0  | 0.1  | 0.1  | 0.1  | 0.0  | 99.8 | 0.0  | 0.0  | 99.8 | 0.0  | 99.9 | 99.9 | 0.0  | 99.9 | 99.9 | 0.0  | 99.7 | 99.7 | 0.0  |
|                              | C | 0.0  | 0.0  | 0.0  | 0.0  | 74.1 | 74.1 | 0.0  | 0.0  | 0.0  | 97.5 | 0.0  | 0.0  | 0.0  | 0.0  | 0.0  | 0.0  | 0.0  | 0.0  | 0.0  | 0.0  | 0.0  |
|                              | G | 99.8 | 0.0  | 99.8 | 0.2  | 0.5  | 0.1  | 99.8 | 0.1  | 99.9 | 0.0  | 0.0  | 99.8 | 0.0  | 0.0  | 99.8 | 0.0  | 0.0  | 99.9 | 0.0  | 0.0  | 99.7 |
|                              | T | 0.1  | 0.0  | 0.1  | 99.7 | 25.3 | 25.7 | 0.1  | 0.0  | 0.0  | 2.4  | 0.1  | 0.1  | 0.0  | 0.1  | 0.0  | 0.0  | 0.0  | 0.0  | 0.0  | 0.0  | 0.1  |
|                              | - | 0.1  | 0.1  | 0.1  | 0.1  | 0.1  | 0.1  | 0.1  | 0.1  | 0.1  | 0.1  | 0.1  | 0.1  | 0.1  | 0.1  | 0.1  | 0.0  | 0.0  | 0.0  | 0.2  | 0.2  | 0.2  |

  

|                              |   | G    | A    | G    | T    | C    | C    | G    | A    | G    | C    | A    | G    | A    | A    | G    | A    | A    | G    | A    | A    | G    |
|------------------------------|---|------|------|------|------|------|------|------|------|------|------|------|------|------|------|------|------|------|------|------|------|------|
| evoA1-seBE-<br>IRES +Rep Rep | A | 0.1  | 99.8 | 0.0  | 0.1  | 0.1  | 0.1  | 0.0  | 99.8 | 0.0  | 0.1  | 99.8 | 0.0  | 99.8 | 99.8 | 0.0  | 99.9 | 99.9 | 0.0  | 99.8 | 99.7 | 0.0  |
|                              | C | 0.0  | 0.1  | 0.0  | 0.1  | 75.5 | 75.5 | 0.0  | 0.1  | 0.0  | 97.2 | 0.0  | 0.0  | 0.0  | 0.0  | 0.0  | 0.0  | 0.0  | 0.0  | 0.0  | 0.0  | 0.0  |
|                              | G | 99.6 | 0.0  | 99.8 | 0.3  | 0.5  | 0.1  | 99.7 | 0.0  | 99.8 | 0.0  | 0.0  | 99.8 | 0.0  | 0.1  | 99.8 | 0.0  | 0.0  | 99.9 | 0.0  | 0.1  | 99.6 |
|                              | T | 0.2  | 0.0  | 0.1  | 99.6 | 23.9 | 24.2 | 0.1  | 0.0  | 0.1  | 2.6  | 0.0  | 0.1  | 0.0  | 0.0  | 0.1  | 0.0  | 0.0  | 0.1  | 0.1  | 0.0  | 0.2  |
|                              | - | 0.1  | 0.1  | 0.1  | 0.1  | 0.1  | 0.1  | 0.1  | 0.1  | 0.1  | 0.1  | 0.1  | 0.1  | 0.1  | 0.1  | 0.1  | 0.0  | 0.0  | 0.0  | 0.1  | 0.1  | 0.1  |

  

|                              |   | G    | A    | G    | T    | C    | C    | G    | A    | G    | C    | A    | G    | A    | A    | G    | A    | A    | G    | A    | A    | G    |
|------------------------------|---|------|------|------|------|------|------|------|------|------|------|------|------|------|------|------|------|------|------|------|------|------|
| evoA1-seBE-<br>IRES +Rep Rep | A | 0.2  | 99.8 | 0.0  | 0.0  | 0.1  | 0.1  | 0.0  | 99.8 | 0.0  | 0.1  | 99.7 | 0.0  | 99.8 | 99.8 | 0.0  | 99.8 | 99.8 | 0.0  | 99.7 | 99.7 | 0.0  |
|                              | C | 0.0  | 0.0  | 0.0  | 0.0  | 69.1 | 69.1 | 0.0  | 0.0  | 0.0  | 97.0 | 0.0  | 0.0  | 0.0  | 0.0  | 0.0  | 0.0  | 0.0  | 0.0  | 0.0  | 0.0  | 0.0  |
|                              | G | 99.6 | 0.0  | 99.7 | 0.2  | 0.4  | 0.0  | 99.7 | 0.0  | 99.8 | 0.0  | 0.1  | 99.7 | 0.0  | 0.0  | 99.8 | 0.0  | 0.0  | 99.8 | 0.0  | 0.0  | 99.6 |
|                              | T | 0.1  | 0.0  | 0.1  | 99.6 | 30.3 | 30.6 | 0.1  | 0.0  | 0.0  | 2.8  | 0.0  | 0.1  | 0.0  | 0.0  | 0.1  | 0.0  | 0.0  | 0.1  | 0.1  | 0.0  | 0.2  |
|                              | - | 0.1  | 0.1  | 0.1  | 0.1  | 0.1  | 0.1  | 0.1  | 0.1  | 0.1  | 0.1  | 0.2  | 0.2  | 0.1  | 0.1  | 0.1  | 0.1  | 0.1  | 0.1  | 0.2  | 0.2  | 0.1  |

  

|                                |   | 1    |      |      | 5    |      |      | 10   |      |      | 15   |      |      | 20   |      |      | PAM  |      |      |      |      |      |
|--------------------------------|---|------|------|------|------|------|------|------|------|------|------|------|------|------|------|------|------|------|------|------|------|------|
|                                |   | G    | A    | G    | T    | C    | C    | G    | A    | G    | C    | A    | G    | A    | A    | G    | A    | A    | G    | A    | A    | G    |
| evoA1-seBE-<br>IRES -Rep Rep 1 | A | 0.0  | 99.8 | 0.0  | 0.0  | 0.1  | 0.1  | 0.0  | 99.8 | 0.0  | 0.1  | 99.9 | 0.0  | 99.9 | 99.9 | 0.0  | 99.9 | 99.9 | 0.0  | 99.8 | 99.8 | 0.0  |
|                                | C | 0.0  | 0.0  | 0.0  | 0.1  | 98.9 | 98.9 | 0.0  | 0.1  | 0.0  | 99.7 | 0.0  | 0.0  | 0.0  | 0.0  | 0.0  | 0.0  | 0.0  | 0.0  | 0.0  | 0.0  | 0.0  |
|                                | G | 99.8 | 0.1  | 99.9 | 0.2  | 0.0  | 0.0  | 99.8 | 0.1  | 99.9 | 0.0  | 0.0  | 99.9 | 0.1  | 0.0  | 99.9 | 0.0  | 0.0  | 99.9 | 0.0  | 0.1  | 99.7 |
|                                | T | 0.1  | 0.0  | 0.1  | 99.7 | 0.9  | 0.9  | 0.1  | 0.0  | 0.0  | 0.3  | 0.0  | 0.1  | 0.0  | 0.0  | 0.1  | 0.0  | 0.0  | 0.1  | 0.0  | 0.0  | 0.2  |
|                                | - | 0.0  | 0.0  | 0.0  | 0.0  | 0.0  | 0.0  | 0.0  | 0.0  | 0.0  | 0.0  | 0.0  | 0.0  | 0.0  | 0.0  | 0.0  | 0.0  | 0.0  | 0.0  | 0.1  | 0.1  | 0.1  |

  

|                                |   | G    | A    | G    | T    | C    | C    | G    | A    | G    | C    | A    | G    | A    | A    | G    | A    | A    | G    | A    | A    | G    |
|--------------------------------|---|------|------|------|------|------|------|------|------|------|------|------|------|------|------|------|------|------|------|------|------|------|
| evoA1-seBE-<br>IRES -Rep Rep 2 | A | 0.0  | 99.9 | 0.0  | 0.0  | 0.1  | 0.1  | 0.1  | 99.9 | 0.1  | 0.1  | 99.9 | 0.0  | 99.9 | 99.9 | 0.0  | 99.9 | 99.9 | 0.0  | 99.8 | 99.8 | 0.0  |
|                                | C | 0.0  | 0.0  | 0.0  | 0.1  | 99.3 | 99.2 | 0.0  | 0.0  | 0.0  | 99.7 | 0.0  | 0.0  | 0.0  | 0.0  | 0.0  | 0.0  | 0.0  | 0.0  | 0.0  | 0.0  | 0.0  |
|                                | G | 99.8 | 0.0  | 99.9 | 0.2  | 0.0  | 0.0  | 99.7 | 0.0  | 99.8 | 0.0  | 0.0  | 99.8 | 0.0  | 0.0  | 99.8 | 0.0  | 0.0  | 99.8 | 0.0  | 0.0  | 99.6 |
|                                | T | 0.2  | 0.0  | 0.1  | 99.7 | 0.6  | 0.6  | 0.2  | 0.0  | 0.1  | 0.1  | 0.0  | 0.1  | 0.0  | 0.0  | 0.1  | 0.0  | 0.0  | 0.1  | 0.1  | 0.0  | 0.2  |
|                                | - | 0.0  | 0.0  | 0.0  | 0.0  | 0.0  | 0.0  | 0.0  | 0.0  | 0.0  | 0.0  | 0.0  | 0.0  | 0.0  | 0.0  | 0.0  | 0.0  | 0.0  | 0.0  | 0.1  | 0.1  | 0.1  |

  

|                                |   | G    | A    | G    | T    | C    | C    | G    | A    | G    | C    | A    | G    | A    | A    | G    | A    | A    | G    | A    | A    | G    |
|--------------------------------|---|------|------|------|------|------|------|------|------|------|------|------|------|------|------|------|------|------|------|------|------|------|
| evoA1-seBE-<br>IRES -Rep Rep 3 | A | 0.0  | 99.9 | 0.0  | 0.1  | 0.1  | 0.2  | 0.0  | 99.8 | 0.1  | 0.0  | 99.9 | 0.0  | 99.9 | 99.8 | 0.0  | 99.9 | 99.9 | 0.0  | 99.8 | 99.8 | 0.0  |
|                                | C | 0.0  | 0.0  | 0.0  | 0.1  | 98.5 | 98.5 | 0.0  | 0.1  | 0.0  | 99.5 | 0.0  | 0.0  | 0.0  | 0.0  | 0.0  | 0.0  | 0.0  | 0.0  | 0.0  | 0.0  | 0.0  |
|                                | G | 99.8 | 0.1  | 99.9 | 0.3  | 0.0  | 0.0  | 99.8 | 0.1  | 99.8 | 0.0  | 0.0  | 99.9 | 0.0  | 0.1  | 99.9 | 0.0  | 0.0  | 99.9 | 0.0  | 0.0  | 99.6 |
|                                | T | 0.1  | 0.0  | 0.1  | 99.6 | 1.4  | 1.3  | 0.1  | 0.0  | 0.1  | 0.4  | 0.0  | 0.1  | 0.0  | 0.0  | 0.1  | 0.0  | 0.0  | 0.1  | 0.1  | 0.0  | 0.3  |
|                                | - | 0.0  | 0.0  | 0.0  | 0.0  | 0.0  | 0.0  | 0.0  | 0.0  | 0.0  | 0.1  | 0.0  | 0.0  | 0.0  | 0.0  | 0.0  | 0.0  | 0.0  | 0.0  | 0.1  | 0.1  | 0.1  |



# Supplementary Figure 4

| <b>c</b>                           |     | <i>A3A constructs, EMXI on-target</i> |      |      |      |      |      |      |      |      |      |      |      |      |      |      |      |        |      |      |      |      |      |      |      |      |      |      |      |      |   |
|------------------------------------|-----|---------------------------------------|------|------|------|------|------|------|------|------|------|------|------|------|------|------|------|--------|------|------|------|------|------|------|------|------|------|------|------|------|---|
| untreated                          |     | E225                                  |      |      |      | S226 |      |      |      | E227 |      |      |      | Q228 |      |      |      | K229   |      |      |      | K230 |      |      |      | K231 |      |      |      |      |   |
|                                    |     | G                                     | A    | G    | T    | C    | C    | G    | A    | G    | C    | A    | G    | C    | A    | G    | A    | A      | G    | A    | A    | G    | A    | A    | G    | A    | A    | A    | G    | G    | G |
|                                    | A   | 0.8                                   | 99.9 | 0.0  | 0.0  | 0.0  | 0.9  | 0.2  | 0.2  | 99.1 | 0.0  | 0.3  | 99.2 | 0.2  | 99.7 | 99.9 | 0.0  | 99.9   | 99.9 | 0.0  | 99.9 | 99.9 | 0.0  | 99.4 | 99.6 | 0.0  | 0.0  | 0.0  | 0.0  | 0.0  |   |
|                                    | C   | 0.0                                   | 0.0  | 0.0  | 0.0  | 99.8 | 99.8 | 0.0  | 0.0  | 0.0  | 99.8 | 0.0  | 0.0  | 0.0  | 0.1  | 0.0  | 0.0  | 0.0    | 0.0  | 0.0  | 0.0  | 0.0  | 0.0  | 0.0  | 0.0  | 0.0  | 0.0  | 0.0  | 0.0  | 0.0  |   |
|                                    | G   | 99.9                                  | 0.0  | 99.8 | 0.1  | 0.0  | 0.0  | 99.8 | 0.0  | 99.9 | 0.1  | 0.1  | 99.9 | 0.1  | 0.1  | 99.7 | 0.0  | 0.1    | 99.7 | 0.0  | 99.5 | 0.1  | 0.0  | 99.8 | 99.8 | 99.8 | 99.8 | 99.8 | 99.8 | 99.8 |   |
| T                                  | 0.0 | 0.0                                   | 0.1  | 99.7 | 0.2  | 0.1  | 0.1  | 0.0  | 0.1  | 0.1  | 0.0  | 0.0  | 0.0  | 0.0  | 0.0  | 0.0  | 0.2  | 0.0    | 0.0  | 0.1  | 0.1  | 0.0  | 0.1  | 0.1  | 0.0  | 0.1  | 0.1  | 0.1  | 0.1  |      |   |
| -                                  | 0.0 | 0.0                                   | 0.0  | 0.0  | 0.0  | 0.0  | 0.0  | 0.0  | 0.0  | 0.0  | 0.0  | 0.0  | 0.0  | 0.0  | 0.0  | 0.0  | 0.0  | 0.0    | 0.0  | 0.4  | 0.4  | 0.4  | 0.4  | 0.0  | 0.4  | 0.4  | 0.4  | 0.0  | 0.0  |      |   |
| A3A-BE4max<br>Replicate 1          |     | 1                                     |      |      |      | 5    |      |      |      | 10   |      |      |      | 15   |      |      |      | 20 PAM |      |      |      |      |      |      |      |      |      |      |      |      |   |
|                                    |     | G                                     | A    | G    | T    | C    | C    | G    | A    | G    | C    | A    | G    | A    | A    | G    | A    | A      | A    | G    | A    | A    | G    | A    | A    | A    | G    | G    | G    |      |   |
|                                    | A   | 0.8                                   | 99.4 | 0.1  | 0.0  | 0.0  | 61.8 | 62.0 | 0.1  | 0.1  | 0.0  | 72.1 | 0.0  | 0.1  | 0.1  | 0.0  | 0.0  | 0.1    | 99.5 | 99.6 | 0.2  | 99.5 | 99.6 | 0.0  | 0.0  | 0.0  | 0.0  | 0.0  |      |      |   |
|                                    | C   | 0.0                                   | 0.1  | 0.0  | 0.0  | 0.0  | 62.3 | 62.5 | 0.0  | 0.0  | 0.0  | 71.3 | 0.0  | 0.0  | 0.0  | 0.0  | 0.0  | 0.0    | 0.0  | 0.0  | 0.0  | 0.0  | 0.0  | 0.0  | 0.0  | 0.0  | 0.0  | 0.0  |      |      |   |
|                                    | G   | 98.6                                  | 0.0  | 99.3 | 0.2  | 1.2  | 0.3  | 98.9 | 0.1  | 99.2 | 0.2  | 0.0  | 98.9 | 0.0  | 99.3 | 0.0  | 99.3 | 0.0    | 99.3 | 0.0  | 99.5 | 0.0  | 0.0  | 99.5 | 0.0  | 0.0  | 99.5 | 99.7 |      |      |   |
| T                                  | 0.2 | 0.0                                   | 0.1  | 99.1 | 35.4 | 36.7 | 0.1  | 0.0  | 0.1  | 26.5 | 0.0  | 0.1  | 0.0  | 0.0  | 0.1  | 0.0  | 0.1  | 0.0    | 0.0  | 0.1  | 0.0  | 0.0  | 0.0  | 0.2  | 0.1  | 0.2  | 0.1  |      |      |      |   |
| -                                  | 0.5 | 0.5                                   | 0.6  | 0.7  | 0.7  | 0.8  | 0.7  | 0.7  | 0.7  | 0.8  | 0.7  | 0.8  | 0.7  | 0.8  | 0.5  | 0.4  | 0.4  | 0.4    | 0.3  | 0.3  | 0.4  | 0.4  | 0.4  | 0.4  | 0.4  | 0.1  | 0.1  |      |      |      |   |
| A3A-BE4max<br>Replicate 2          |     | G                                     | A    | G    | T    | C    | C    | G    | A    | G    | C    | A    | G    | A    | A    | G    | A    | A      | A    | G    | A    | A    | G    | A    | A    | G    | G    | G    |      |      |   |
|                                    | A   | 0.5                                   | 99.5 | 0.0  | 0.0  | 0.5  | 0.2  | 0.2  | 99.3 | 0.1  | 0.4  | 99.4 | 0.1  | 99.5 | 99.5 | 0.1  | 99.6 | 99.7   | 0.1  | 99.4 | 99.5 | 0.0  | 0.0  | 0.0  | 0.0  | 0.0  | 0.0  | 0.0  |      |      |   |
|                                    | C   | 0.0                                   | 0.0  | 0.0  | 0.0  | 71.5 | 71.1 | 0.1  | 0.0  | 0.0  | 78.8 | 0.0  | 0.1  | 0.0  | 0.0  | 0.0  | 0.0  | 0.0    | 0.0  | 0.0  | 0.0  | 0.0  | 0.0  | 0.0  | 0.0  | 0.0  | 0.0  | 0.0  |      |      |   |
|                                    | G   | 98.9                                  | 0.1  | 99.5 | 0.2  | 1.0  | 0.1  | 99.1 | 0.1  | 99.3 | 0.1  | 0.0  | 99.3 | 0.0  | 99.3 | 0.0  | 99.4 | 0.0    | 99.6 | 0.0  | 99.6 | 0.0  | 0.0  | 99.3 | 99.7 | 99.6 | 99.6 | 99.6 |      |      |   |
|                                    | T   | 0.2                                   | 0.0  | 0.1  | 99.3 | 26.5 | 28.1 | 0.1  | 0.0  | 0.1  | 20.2 | 0.0  | 0.1  | 0.0  | 0.0  | 0.1  | 0.0  | 0.1    | 0.0  | 0.0  | 0.1  | 0.1  | 0.0  | 0.2  | 0.1  | 0.2  | 0.2  | 0.2  |      |      |   |
| -                                  | 0.4 | 0.4                                   | 0.4  | 0.4  | 0.5  | 0.5  | 0.5  | 0.5  | 0.5  | 0.6  | 0.5  | 0.5  | 0.4  | 0.4  | 0.4  | 0.3  | 0.2  | 0.2    | 0.5  | 0.4  | 0.4  | 0.4  | 0.4  | 0.4  | 0.4  | 0.2  | 0.1  |      |      |      |   |
| A3A-BE4max<br>Replicate 3          |     | G                                     | A    | G    | T    | C    | C    | G    | A    | G    | C    | A    | G    | A    | A    | G    | A    | A      | A    | G    | A    | A    | G    | A    | A    | G    | G    | G    |      |      |   |
|                                    | A   | 0.4                                   | 99.4 | 0.0  | 0.1  | 0.6  | 0.4  | 0.2  | 99.1 | 0.1  | 0.6  | 99.2 | 0.2  | 99.5 | 99.5 | 0.2  | 99.7 | 99.7   | 0.1  | 99.4 | 99.5 | 0.0  | 0.0  | 0.0  | 0.1  | 0.1  | 0.1  | 0.1  |      |      |   |
|                                    | C   | 0.1                                   | 0.0  | 0.0  | 0.0  | 62.3 | 62.5 | 0.0  | 0.0  | 0.0  | 71.3 | 0.0  | 0.0  | 0.0  | 0.0  | 0.0  | 0.0  | 0.0    | 0.0  | 0.0  | 0.0  | 0.0  | 0.0  | 0.0  | 0.0  | 0.0  | 0.0  | 0.0  |      |      |   |
|                                    | G   | 98.9                                  | 0.1  | 99.3 | 0.2  | 1.4  | 0.2  | 98.9 | 0.1  | 99.1 | 0.2  | 0.0  | 99.0 | 0.0  | 99.3 | 0.0  | 99.3 | 0.0    | 99.7 | 0.0  | 99.7 | 0.0  | 0.0  | 99.4 | 99.7 | 99.6 | 99.6 | 99.6 |      |      |   |
|                                    | T   | 0.1                                   | 0.0  | 0.1  | 99.0 | 35.1 | 36.0 | 0.2  | 0.1  | 0.1  | 27.2 | 0.1  | 0.2  | 0.0  | 0.0  | 0.1  | 0.0  | 0.1    | 0.0  | 0.0  | 0.1  | 0.1  | 0.0  | 0.2  | 0.1  | 0.2  | 0.2  | 0.2  |      |      |   |
| -                                  | 0.5 | 0.5                                   | 0.6  | 0.7  | 0.7  | 0.9  | 0.7  | 0.7  | 0.7  | 0.7  | 0.6  | 0.6  | 0.4  | 0.4  | 0.4  | 0.4  | 0.2  | 0.2    | 0.2  | 0.2  | 0.4  | 0.4  | 0.4  | 0.4  | 0.4  | 0.1  | 0.1  |      |      |      |   |
| A3A-seBE-IRE5<br>+Rap Replicate 1  |     | 1                                     |      |      |      | 5    |      |      |      | 10   |      |      |      | 15   |      |      |      | 20 PAM |      |      |      |      |      |      |      |      |      |      |      |      |   |
|                                    |     | G                                     | A    | G    | T    | C    | C    | G    | A    | G    | C    | A    | G    | A    | A    | G    | A    | A      | A    | G    | A    | A    | G    | A    | A    | G    | G    | G    |      |      |   |
|                                    | A   | 0.2                                   | 99.8 | 0.0  | 0.0  | 0.2  | 0.2  | 0.1  | 99.8 | 0.0  | 0.1  | 99.9 | 0.0  | 99.8 | 99.8 | 0.0  | 99.9 | 99.9   | 0.0  | 99.8 | 99.8 | 0.0  | 0.0  | 0.0  | 0.0  | 0.0  | 0.0  | 0.1  |      |      |   |
|                                    | C   | 0.0                                   | 0.0  | 0.0  | 0.1  | 69.3 | 69.0 | 0.0  | 0.1  | 0.0  | 84.2 | 0.0  | 0.0  | 0.0  | 0.0  | 0.0  | 0.0  | 0.0    | 0.0  | 0.0  | 0.0  | 0.0  | 0.0  | 0.0  | 0.0  | 0.0  | 0.0  | 0.0  |      |      |   |
|                                    | G   | 99.5                                  | 0.0  | 99.8 | 0.2  | 0.5  | 0.1  | 99.6 | 0.1  | 99.8 | 0.1  | 0.0  | 99.8 | 0.0  | 0.1  | 99.8 | 0.0  | 99.8   | 0.0  | 99.8 | 0.0  | 0.0  | 0.0  | 99.6 | 99.7 | 99.8 | 99.8 | 99.8 |      |      |   |
| T                                  | 0.2 | 0.0                                   | 0.1  | 99.6 | 30.0 | 30.7 | 0.2  | 0.0  | 0.1  | 15.4 | 0.0  | 0.1  | 0.0  | 0.0  | 0.1  | 0.0  | 0.1  | 0.0    | 0.1  | 0.0  | 0.1  | 0.0  | 0.0  | 0.2  | 0.2  | 0.2  | 0.1  |      |      |      |   |
| -                                  | 0.1 | 0.1                                   | 0.1  | 0.1  | 0.1  | 0.1  | 0.1  | 0.1  | 0.1  | 0.1  | 0.1  | 0.1  | 0.1  | 0.1  | 0.1  | 0.1  | 0.1  | 0.0    | 0.0  | 0.1  | 0.1  | 0.0  | 0.1  | 0.1  | 0.0  | 0.0  | 0.0  |      |      |      |   |
| A3A-seBE-IRE5<br>+Rap Replicate 2  |     | G                                     | A    | G    | T    | C    | C    | G    | A    | G    | C    | A    | G    | A    | A    | G    | A    | A      | A    | G    | A    | A    | G    | A    | A    | G    | G    | G    |      |      |   |
|                                    | A   | 0.1                                   | 99.8 | 0.0  | 0.0  | 0.1  | 0.2  | 0.1  | 99.8 | 0.0  | 0.1  | 99.8 | 0.0  | 99.8 | 99.8 | 0.0  | 99.8 | 99.8   | 0.0  | 99.7 | 99.7 | 0.0  | 0.0  | 0.0  | 0.0  | 0.0  | 0.0  | 0.1  |      |      |   |
|                                    | C   | 0.0                                   | 0.0  | 0.0  | 0.0  | 73.8 | 73.5 | 0.0  | 0.0  | 0.0  | 86.6 | 0.0  | 0.0  | 0.0  | 0.0  | 0.0  | 0.0  | 0.0    | 0.0  | 0.0  | 0.0  | 0.0  | 0.0  | 0.0  | 0.0  | 0.0  | 0.0  | 0.0  |      |      |   |
|                                    | G   | 99.7                                  | 0.1  | 99.8 | 0.2  | 0.7  | 0.0  | 99.7 | 0.0  | 99.7 | 0.1  | 0.0  | 99.7 | 0.0  | 99.8 | 0.1  | 99.8 | 0.1    | 99.8 | 0.0  | 99.8 | 0.0  | 0.1  | 99.6 | 99.8 | 99.7 | 99.7 | 99.7 |      |      |   |
|                                    | T   | 0.2                                   | 0.0  | 0.1  | 99.6 | 25.2 | 26.1 | 0.1  | 0.0  | 0.1  | 13.0 | 0.0  | 0.1  | 0.0  | 0.0  | 0.1  | 0.0  | 0.1    | 0.0  | 0.1  | 0.0  | 0.1  | 0.0  | 0.2  | 0.1  | 0.2  | 0.1  | 0.1  |      |      |   |
| -                                  | 0.0 | 0.0                                   | 0.1  | 0.1  | 0.1  | 0.1  | 0.1  | 0.1  | 0.1  | 0.1  | 0.1  | 0.1  | 0.1  | 0.1  | 0.1  | 0.1  | 0.1  | 0.1    | 0.1  | 0.1  | 0.1  | 0.1  | 0.2  | 0.2  | 0.2  | 0.1  | 0.1  |      |      |      |   |
| A3A-seBE-IRE5<br>+Rap Replicate 3  |     | G                                     | A    | G    | T    | C    | C    | G    | A    | G    | C    | A    | G    | A    | A    | G    | A    | A      | A    | G    | A    | A    | G    | A    | A    | G    | G    | G    |      |      |   |
|                                    | A   | 0.3                                   | 99.8 | 0.0  | 0.0  | 0.2  | 0.1  | 0.1  | 99.7 | 0.0  | 0.2  | 99.7 | 0.0  | 99.8 | 99.8 | 0.0  | 99.9 | 99.8   | 0.0  | 99.7 | 99.8 | 0.0  | 0.0  | 0.0  | 0.0  | 0.0  | 0.0  | 0.0  |      |      |   |
|                                    | C   | 0.0                                   | 0.0  | 0.0  | 0.0  | 58.6 | 59.3 | 0.0  | 0.0  | 0.0  | 77.1 | 0.0  | 0.0  | 0.0  | 0.1  | 0.0  | 0.0  | 0.1    | 0.0  | 0.0  | 0.0  | 0.1  | 0.0  | 0.1  | 0.0  | 0.0  | 0.0  | 0.0  |      |      |   |
|                                    | G   | 99.5                                  | 0.1  | 99.7 | 0.0  | 0.5  | 0.0  | 99.4 | 0.0  | 99.6 | 0.1  | 0.0  | 99.6 | 0.0  | 99.6 | 0.0  | 99.8 | 0.0    | 99.8 | 0.0  | 99.7 | 0.0  | 0.0  | 99.8 | 99.8 | 99.8 | 99.8 | 99.8 |      |      |   |
|                                    | T   | 0.1                                   | 0.0  | 0.0  | 99.8 | 40.5 | 40.2 | 0.3  | 0.0  | 0.1  | 22.3 | 0.0  | 0.1  | 0.0  | 0.0  | 0.1  | 0.0  | 0.1    | 0.0  | 0.0  | 0.1  | 0.0  | 0.0  | 0.1  | 0.1  | 0.1  | 0.1  | 0.1  |      |      |   |
| -                                  | 0.2 | 0.2                                   | 0.2  | 0.2  | 0.2  | 0.3  | 0.3  | 0.3  | 0.3  | 0.3  | 0.3  | 0.3  | 0.2  | 0.1  | 0.1  | 0.1  | 0.1  | 0.1    | 0.1  | 0.2  | 0.2  | 0.2  | 0.2  | 0.1  | 0.1  | 0.1  | 0.1  |      |      |      |   |
| A3A-seBE-IRE5<br>NoRap Replicate   |     | 1                                     |      |      |      | 5    |      |      |      | 10   |      |      |      | 15   |      |      |      | 20 PAM |      |      |      |      |      |      |      |      |      |      |      |      |   |
|                                    |     | G                                     | A    | G    | T    | C    | C    | G    | A    | G    | C    | A    | G    | A    | A    | G    | A    | A      | A    | G    | A    | A    | G    | A    | A    | G    | G    | G    |      |      |   |
|                                    | A   | 0.0                                   | 99.9 | 0.0  | 0.0  | 0.1  | 0.1  | 0.0  | 99.9 | 0.0  | 0.0  | 99.9 | 0.0  | 99.9 | 99.9 | 0.0  | 99.9 | 99.9   | 0.0  | 99.9 | 99.9 | 0.0  | 0.0  | 0.0  | 0.0  | 0.0  | 0.0  | 0.0  |      |      |   |
|                                    | C   | 0.0                                   | 0.0  | 0.0  | 0.1  | 97.3 | 97.2 | 0.0  | 0.0  | 0.0  | 98.9 | 0.0  | 0.0  | 0.0  | 0.0  | 0.0  | 0.0  | 0.0    | 0.0  | 0.0  | 0.0  | 0.0  | 0.0  | 0.0  | 0.0  | 0.0  | 0.0  | 0.0  |      |      |   |
|                                    | G   | 99.8                                  | 0.1  | 99.9 | 0.2  | 0.0  | 0.0  | 99.8 | 0.0  | 99.8 | 0.0  | 0.0  | 99.9 | 0.0  | 0.0  | 0.0  | 99.9 | 0.0    | 99.9 | 0.0  | 99.9 | 0.0  | 0.0  | 99.7 | 99.8 | 99.8 | 99.8 | 99.8 |      |      |   |
| T                                  | 0.1 | 0.0                                   | 0.0  | 99.6 | 2.6  | 2.6  | 0.1  | 0.0  | 0.1  | 1.0  | 0.0  | 0.1  | 0.0  | 0.0  | 0.1  | 0.0  | 0.1  | 0.0    | 0.0  | 0.1  | 0.0  | 0.0  | 0.2  | 0.1  | 0.2  | 0.1  | 0.1  |      |      |      |   |
| -                                  | 0.0 | 0.0                                   | 0.0  | 0.0  | 0.0  | 0.0  | 0.1  | 0.0  | 0.0  | 0.1  | 0.1  | 0.1  | 0.1  | 0.0  | 0.0  | 0.0  | 0.0  | 0.0    | 0.0  | 0.1  | 0.1  | 0.0  | 0.1  | 0.1  | 0.1  | 0.0  | 0.0  |      |      |      |   |
| A3A-seBE-IRE5<br>NoRap Replicate 2 |     | G                                     | A    | G    | T    | C    | C    | G    | A    | G    | C    | A    | G    | A    | A    | G    | A    | A      | A    | G    | A    | A    | G    | A    | A    | G    | G    | G    |      |      |   |
|                                    | A   | 0.0                                   | 99.9 | 0.0  | 0.1  | 0.1  | 0.1  | 0.1  | 99.9 | 0.0  | 0.1  | 99.9 | 0.0  | 99.9 | 99.9 | 0.0  | 99.9 | 99.9   | 0.0  | 99.7 | 99.7 | 0.0  | 0.0  | 0.0  | 0.0  | 0.0  | 0.0  | 0.0  |      |      |   |
|                                    | C   | 0.0                                   | 0.1  | 0.0  | 0.0  | 98.6 | 98.5 | 0.0  | 0.0  | 0.0  | 99.4 | 0.1  | 0.0  | 0.0  | 0.0  | 0.0  | 0.0  | 0.0    | 0.0  | 0.0  | 0.0  | 0.0  | 0.0  | 0.0  | 0.0  | 0.0  | 0.0  | 0.0  |      |      |   |
|                                    | G   | 99.9                                  | 0.1  |      |      |      |      |      |      |      |      |      |      |      |      |      |      |        |      |      |      |      |      |      |      |      |      |      |      |      |   |

# Supplementary Figure 4

| d <i>AID'-constructs, dSaCas9-target site</i> |   |      |      |      |      |      |      |      |      |      |      |      |      |      |      |      |      |      |      |      |      |      |      |      |      |      |      |     |
|-----------------------------------------------|---|------|------|------|------|------|------|------|------|------|------|------|------|------|------|------|------|------|------|------|------|------|------|------|------|------|------|-----|
|                                               |   | T    | C    | T    | G    | C    | T    | T    | C    | T    | C    | C    | A    | G    | C    | C    | C    | T    | G    | G    | C    | C    | T    | G    | G    | T    |      |     |
| untreated                                     | A | 0.0  | 0.0  | 0.0  | 0.0  | 0.0  | 0.0  | 0.0  | 0.0  | 0.0  | 0.0  | 0.0  | 99.7 | 0.0  | 0.0  | 0.1  | 0.0  | 0.0  | 0.0  | 0.0  | 0.0  | 0.0  | 0.0  | 0.0  | 0.0  | 0.0  |      |     |
|                                               | C | 0.0  | 99.8 | 0.0  | 0.0  | 99.8 | 0.0  | 0.0  | 99.7 | 0.0  | 99.7 | 99.6 | 0.0  | 0.0  | 99.6 | 99.5 | 99.6 | 0.0  | 0.0  | 0.0  | 99.3 | 99.4 | 0.0  | 0.0  | 0.0  | 0.0  |      |     |
|                                               | G | 0.0  | 0.0  | 0.0  | 99.8 | 0.0  | 0.0  | 0.0  | 0.0  | 0.0  | 0.0  | 0.0  | 0.0  | 99.6 | 0.0  | 0.0  | 0.0  | 0.0  | 99.5 | 99.3 | 0.0  | 0.0  | 0.0  | 99.2 | 99.2 | 99.1 |      |     |
|                                               | T | 99.7 | 4.8  | 99.8 | 0.1  | 8.6  | 99.6 | 99.6 | 3.1  | 99.6 | 3.5  | 2.8  | 0.0  | 0.1  | 8.2  | 0.3  | 2.2  | 99.4 | 0.1  | 0.1  | 0.0  | 0.0  | 99.1 | 0.3  | 0.2  | 0.2  |      |     |
|                                               | - | 0.3  | 0.2  | 0.2  | 0.2  | 0.2  | 0.2  | 0.2  | 0.2  | 0.2  | 0.2  | 0.2  | 0.3  | 0.3  | 0.3  | 0.4  | 0.4  | 0.4  | 0.5  | 0.6  | 0.6  | 0.6  | 0.7  | 0.7  | 0.7  | 0.8  | 1.3  |     |
| AID-BEImax<br>Replicate 1                     |   |      | T    | C    | T    | G    | C    | T    | T    | C    | T    | C    | C    | A    | G    | C    | C    | C    | T    | G    | G    | C    | C    | T    | G    | G    | T    |     |
|                                               | A | 0.0  | 0.1  | 0.0  | 0.4  | 0.3  | 0.0  | 0.0  | 0.0  | 0.0  | 0.0  | 0.1  | 99.5 | 0.0  | 0.2  | 0.0  | 0.0  | 0.0  | 0.0  | 0.1  | 0.0  | 0.0  | 0.0  | 0.0  | 0.0  | 0.0  |      |     |
|                                               | C | 0.0  | 94.4 | 0.0  | 0.0  | 90.3 | 0.0  | 0.0  | 96.5 | 0.1  | 96.0 | 96.7 | 0.0  | 0.0  | 91.1 | 99.1 | 97.3 | 0.0  | 0.0  | 0.0  | 99.2 | 99.2 | 0.1  | 0.0  | 0.0  | 0.0  | 0.0  |     |
|                                               | G | 0.0  | 0.1  | 0.0  | 99.2 | 0.5  | 0.0  | 0.0  | 0.0  | 0.0  | 0.1  | 0.0  | 0.0  | 99.3 | 0.0  | 0.0  | 0.0  | 0.0  | 99.1 | 99.1 | 0.0  | 0.0  | 0.0  | 0.0  | 98.7 | 98.8 | 98.8 |     |
|                                               | T | 99.6 | 4.8  | 99.7 | 0.1  | 8.6  | 99.6 | 99.6 | 3.1  | 99.6 | 3.5  | 2.8  | 0.0  | 0.1  | 8.2  | 0.3  | 2.2  | 99.4 | 0.1  | 0.1  | 0.0  | 0.0  | 99.1 | 0.3  | 0.2  | 0.2  | 98.4 |     |
| AID-BEImax<br>Replicate 2                     | A | 0.0  | 0.1  | 0.0  | 0.3  | 0.2  | 0.0  | 0.0  | 0.0  | 0.1  | 0.0  | 99.5 | 0.0  | 0.0  | 0.1  | 0.0  | 0.0  | 0.0  | 0.0  | 0.0  | 0.1  | 0.0  | 0.0  | 0.0  | 0.1  | 0.0  |      |     |
|                                               | C | 0.0  | 96.1 | 0.0  | 0.0  | 93.0 | 0.0  | 0.0  | 97.4 | 0.0  | 96.3 | 97.1 | 0.1  | 0.1  | 93.6 | 99.3 | 98.2 | 0.0  | 0.0  | 0.0  | 99.4 | 99.3 | 0.1  | 0.0  | 0.0  | 0.0  | 0.1  |     |
|                                               | G | 0.0  | 0.0  | 0.0  | 99.3 | 0.3  | 0.0  | 0.0  | 0.0  | 0.0  | 0.2  | 0.0  | 0.1  | 99.4 | 0.0  | 0.0  | 0.0  | 0.0  | 99.3 | 99.1 | 0.0  | 0.0  | 0.0  | 0.0  | 98.9 | 99.0 | 98.9 |     |
|                                               | T | 99.4 | 3.4  | 99.8 | 0.2  | 6.3  | 99.8 | 99.8 | 2.4  | 99.7 | 3.2  | 2.6  | 0.0  | 0.2  | 6.1  | 0.3  | 1.4  | 99.5 | 0.2  | 0.3  | 0.0  | 0.0  | 99.2 | 0.4  | 0.2  | 0.2  | 98.4 |     |
|                                               | - | 0.5  | 0.3  | 0.1  | 0.2  | 0.2  | 0.2  | 0.2  | 0.2  | 0.2  | 0.2  | 0.2  | 0.3  | 0.3  | 0.3  | 0.3  | 0.4  | 0.4  | 0.4  | 0.4  | 0.5  | 0.5  | 0.6  | 0.6  | 0.6  | 0.7  | 0.8  | 0.9 |
| AID-BEImax<br>Replicate 3                     | A | 0.0  | 0.1  | 0.0  | 0.7  | 0.7  | 0.0  | 0.0  | 0.0  | 0.0  | 0.0  | 0.0  | 99.6 | 0.0  | 0.1  | 0.0  | 0.0  | 0.0  | 0.0  | 0.0  | 0.0  | 0.1  | 0.0  | 0.0  | 0.0  | 0.1  | 0.0  |     |
|                                               | C | 0.0  | 88.9 | 0.0  | 0.0  | 81.8 | 0.0  | 0.0  | 93.3 | 0.1  | 91.1 | 92.6 | 0.0  | 0.0  | 82.6 | 98.6 | 94.7 | 0.1  | 0.0  | 0.0  | 99.5 | 99.5 | 0.1  | 0.0  | 0.0  | 0.0  | 0.0  |     |
|                                               | G | 0.0  | 0.2  | 0.0  | 99.0 | 0.8  | 0.0  | 0.0  | 0.1  | 0.0  | 0.3  | 0.0  | 0.0  | 99.6 | 0.0  | 0.0  | 0.0  | 0.0  | 99.5 | 99.5 | 0.0  | 0.0  | 0.0  | 0.0  | 98.9 | 99.0 | 98.9 |     |
|                                               | T | 99.7 | 10.1 | 99.8 | 0.1  | 16.5 | 99.8 | 99.8 | 6.4  | 99.7 | 8.4  | 7.0  | 0.0  | 0.0  | 16.9 | 1.0  | 4.8  | 99.6 | 0.1  | 0.0  | 0.1  | 0.0  | 99.3 | 0.1  | 0.1  | 0.0  | 99.0 |     |
|                                               | - | 0.2  | 0.7  | 0.1  | 0.2  | 0.2  | 0.2  | 0.2  | 0.2  | 0.2  | 0.2  | 0.2  | 0.3  | 0.3  | 0.3  | 0.4  | 0.4  | 0.4  | 0.3  | 0.4  | 0.4  | 0.4  | 0.5  | 0.5  | 0.5  | 0.5  | 0.7  | 1.0 |
| AID-seBE-IRE5<br>+Rep Replicate 1             |   |      | T    | C    | T    | G    | C    | T    | T    | C    | T    | C    | C    | A    | G    | C    | C    | C    | T    | G    | G    | C    | C    | T    | G    | G    | T    |     |
|                                               | A | 0.0  | 0.0  | 0.0  | 0.0  | 0.0  | 0.0  | 0.0  | 0.0  | 0.0  | 0.0  | 0.0  | 0.0  | 99.6 | 0.0  | 0.0  | 0.0  | 0.0  | 0.0  | 0.0  | 0.0  | 0.0  | 0.0  | 0.0  | 0.0  | 0.0  | 0.0  |     |
|                                               | C | 0.0  | 99.7 | 0.0  | 0.0  | 98.5 | 0.0  | 0.0  | 99.7 | 0.0  | 99.4 | 99.5 | 0.1  | 0.0  | 98.3 | 99.7 | 99.5 | 0.0  | 0.0  | 0.0  | 99.5 | 99.5 | 0.0  | 0.0  | 0.0  | 0.0  | 0.0  |     |
|                                               | G | 0.0  | 0.0  | 0.0  | 99.2 | 0.1  | 0.0  | 0.0  | 0.0  | 0.0  | 0.0  | 0.0  | 0.0  | 99.5 | 0.0  | 0.0  | 0.0  | 0.0  | 99.4 | 99.4 | 0.0  | 0.0  | 0.0  | 0.0  | 99.0 | 99.2 | 99.1 |     |
|                                               | T | 99.7 | 0.2  | 99.8 | 0.1  | 1.1  | 99.8 | 99.8 | 0.1  | 99.8 | 0.3  | 0.2  | 0.0  | 0.2  | 1.4  | 0.0  | 0.1  | 99.6 | 0.2  | 0.2  | 0.0  | 0.0  | 99.4 | 0.4  | 0.2  | 0.0  | 98.9 |     |
| AID-seBE-IRE5<br>+Rep Replicate 2             | A | 0.0  | 0.0  | 0.0  | 0.0  | 0.0  | 0.0  | 0.0  | 0.0  | 0.0  | 0.0  | 0.0  | 99.6 | 0.0  | 0.0  | 0.0  | 0.0  | 0.0  | 0.0  | 0.0  | 0.1  | 0.0  | 0.0  | 0.0  | 0.0  | 0.0  |      |     |
|                                               | C | 0.0  | 99.5 | 0.0  | 0.0  | 99.0 | 0.0  | 0.0  | 99.5 | 0.0  | 99.1 | 99.3 | 0.1  | 0.0  | 98.3 | 99.6 | 99.5 | 0.0  | 0.0  | 0.0  | 99.3 | 99.3 | 0.1  | 0.0  | 0.0  | 0.0  | 0.0  |     |
|                                               | G | 0.0  | 0.0  | 0.0  | 99.7 | 0.1  | 0.0  | 0.0  | 0.0  | 0.0  | 0.1  | 0.0  | 0.0  | 99.6 | 0.0  | 0.0  | 0.0  | 0.0  | 99.4 | 99.2 | 0.0  | 0.0  | 0.0  | 0.0  | 98.8 | 99.0 | 98.9 |     |
|                                               | T | 99.5 | 0.2  | 99.8 | 0.0  | 0.7  | 99.8 | 99.7 | 0.3  | 99.7 | 0.5  | 0.4  | 0.0  | 0.1  | 1.4  | 0.1  | 0.1  | 99.6 | 0.1  | 0.1  | 0.0  | 0.0  | 99.2 | 0.4  | 0.1  | 0.1  | 98.6 |     |
|                                               | - | 0.5  | 0.2  | 0.2  | 0.2  | 0.2  | 0.2  | 0.2  | 0.2  | 0.2  | 0.2  | 0.2  | 0.3  | 0.3  | 0.3  | 0.4  | 0.4  | 0.4  | 0.5  | 0.5  | 0.6  | 0.6  | 0.6  | 0.7  | 0.7  | 0.8  | 0.9  | 1.3 |
| AID-seBE-IRE5<br>+Rep Replicate 3             | A | 0.0  | 0.0  | 0.0  | 0.0  | 0.0  | 0.0  | 0.0  | 0.0  | 0.0  | 0.0  | 0.1  | 99.6 | 0.0  | 0.0  | 0.0  | 0.0  | 0.0  | 0.0  | 0.0  | 0.0  | 0.0  | 0.0  | 0.0  | 0.0  | 0.0  |      |     |
|                                               | C | 0.0  | 99.4 | 0.0  | 0.0  | 97.8 | 0.0  | 0.0  | 99.4 | 0.0  | 99.0 | 99.1 | 0.0  | 0.0  | 97.1 | 99.4 | 99.3 | 0.0  | 0.0  | 0.0  | 99.2 | 99.2 | 0.0  | 0.0  | 0.0  | 0.0  | 0.0  |     |
|                                               | G | 0.0  | 0.0  | 0.0  | 99.7 | 0.1  | 0.0  | 0.0  | 0.0  | 0.0  | 0.1  | 0.0  | 0.0  | 99.5 | 0.0  | 0.0  | 0.0  | 0.0  | 99.3 | 99.2 | 0.0  | 0.0  | 0.0  | 0.0  | 98.9 | 98.9 | 98.8 |     |
|                                               | T | 99.6 | 0.3  | 99.7 | 0.0  | 1.8  | 99.7 | 99.7 | 0.3  | 99.6 | 0.5  | 0.4  | 0.0  | 0.1  | 2.4  | 0.1  | 0.2  | 99.5 | 0.1  | 0.0  | 0.0  | 99.1 | 0.1  | 0.1  | 0.1  | 0.1  | 98.4 |     |
|                                               | - | 0.3  | 0.2  | 0.2  | 0.2  | 0.3  | 0.3  | 0.3  | 0.3  | 0.3  | 0.3  | 0.3  | 0.4  | 0.4  | 0.4  | 0.5  | 0.5  | 0.5  | 0.6  | 0.7  | 0.7  | 0.8  | 0.8  | 0.9  | 1.0  | 1.1  | 1.5  |     |
| AID-seBE-IRE5<br>NoRep Replicate 1            |   |      | T    | C    | T    | G    | C    | T    | T    | C    | T    | C    | C    | A    | G    | C    | C    | C    | T    | G    | G    | C    | C    | T    | G    | G    | T    |     |
|                                               | A | 0.0  | 0.0  | 0.0  | 0.0  | 0.0  | 0.0  | 0.0  | 0.0  | 0.0  | 0.0  | 0.0  | 0.0  | 99.7 | 0.0  | 0.0  | 0.0  | 0.0  | 0.0  | 0.0  | 0.0  | 0.0  | 0.0  | 0.0  | 0.0  | 0.0  | 0.0  |     |
|                                               | C | 0.0  | 99.8 | 0.0  | 0.0  | 99.8 | 0.0  | 0.0  | 99.8 | 0.0  | 99.8 | 99.7 | 0.0  | 0.0  | 99.7 | 99.7 | 99.7 | 0.0  | 0.0  | 0.0  | 99.6 | 99.3 | 0.0  | 0.0  | 0.0  | 0.0  | 0.0  |     |
|                                               | G | 0.0  | 0.0  | 0.0  | 99.8 | 0.0  | 0.0  | 0.0  | 0.0  | 0.0  | 0.0  | 0.0  | 0.0  | 99.6 | 0.0  | 0.0  | 0.0  | 0.0  | 99.4 | 99.4 | 0.0  | 0.0  | 0.0  | 0.0  | 99.0 | 99.2 | 99.2 |     |
|                                               | T | 99.8 | 0.0  | 99.8 | 0.0  | 0.0  | 99.8 | 99.8 | 0.0  | 99.8 | 0.1  | 0.0  | 0.0  | 0.2  | 0.0  | 0.0  | 0.0  | 99.7 | 0.2  | 0.1  | 0.0  | 0.0  | 99.5 | 0.5  | 0.2  | 0.0  | 98.7 |     |
| AID-seBE-IRE5<br>NoRep Replicate 2            | A | 0.0  | 0.0  | 0.0  | 0.1  | 0.0  | 0.0  | 0.0  | 0.0  | 0.1  | 0.1  | 99.7 | 0.0  | 0.0  | 0.0  | 0.0  | 0.0  | 0.0  | 0.0  | 0.0  | 0.0  | 0.0  | 0.0  | 0.0  | 0.1  | 0.0  | 0.0  |     |
|                                               | C | 0.0  | 99.8 | 0.0  | 0.0  | 99.8 | 0.0  | 0.0  | 99.8 | 0.1  | 99.7 | 99.6 | 0.0  | 0.0  | 99.7 | 99.7 | 99.7 | 0.0  | 0.0  | 0.1  | 99.3 | 99.3 | 0.1  | 0.0  | 0.0  | 0.0  | 0.0  |     |
|                                               | G | 0.0  | 0.0  | 0.0  | 99.7 | 0.0  | 0.0  | 0.0  | 0.0  | 0.0  | 0.0  | 0.1  | 99.5 | 0.0  | 0.0  | 0.0  | 0.0  | 0.0  | 99.3 | 99.2 | 0.0  | 0.0  | 0.0  | 0.0  | 98.9 | 99.0 | 99.0 |     |
|                                               | T | 99.4 | 0.0  | 99.8 | 0.0  | 0.0  | 99.8 | 99.8 | 0.0  | 99.7 | 0.1  | 0.1  | 0.0  | 0.2  | 0.1  | 0.0  | 0.0  | 99.6 | 0.2  | 0.1  | 0.0  | 0.0  | 99.2 | 0.4  | 0.1  | 0.1  | 98.5 |     |
|                                               | - | 0.6  | 0.1  | 0.1  | 0.2  | 0.2  | 0.2  | 0.2  | 0.2  | 0.2  | 0.2  | 0.2  | 0.2  | 0.2  | 0.2  | 0.2  | 0.3  | 0.3  | 0.4  | 0.5  | 0.6  | 0.6  | 0.6  | 0.7  | 0.7  | 0.8  | 0.9  | 1.4 |
| AID-seBE-IRE5<br>NoRep Replicate 3            | A | 0.0  | 0.0  | 0.0  | 0.0  | 0.0  | 0.0  | 0.0  | 0.0  | 0.1  | 0.1  | 99.6 | 0.0  | 0.0  | 0.1  | 0.0  | 0.0  | 0.0  | 0.0  | 0.0  | 0.0  | 0.0  | 0.0  | 0.0  | 0.0  | 0.0  | 0.0  |     |
|                                               | C | 0.0  | 99.3 | 0.0  | 0.0  | 99.6 | 0.0  | 0.0  | 99.0 | 0.0  | 98.8 | 98.9 | 0.0  | 0.0  | 99.3 | 99.3 | 99.3 | 0.0  | 0.0  | 0.0  | 99.3 | 99.4 | 0.1  | 0.0  | 0.0  | 0.0  | 0.0  |     |
|                                               | G | 0.0  | 0.0  | 0.0  | 99.8 | 0.0  | 0.0  | 0.0  | 0.0  | 0.1  | 0.0  | 0.1  | 99.6 | 0.0  | 0.0  | 0.0  | 0.0  | 0.0  | 99.4 | 99.3 | 0.0  | 0.0  | 0.0  | 0.0  | 99.2 | 99.2 | 99.1 |     |
|                                               | T | 99.7 | 0.6  | 99.8 | 0.0  | 0.2  | 99.8 | 99.8 | 0.8  | 99.8 | 0.8  | 0.8  | 0.0  | 0.1  | 0.4  | 0.3  | 0.3  | 99.6 | 0.0  | 0.1  | 0.0  | 0.0  | 99.3 | 0.1  | 0.0  | 0.0  | 98.6 |     |
|                                               | - | 0.3  | 0.1  | 0.1  | 0.1  | 0.2  | 0.2  | 0.2  | 0.2  | 0.2  | 0.2  | 0.3  | 0.3  | 0.3  | 0.3  | 0.3  | 0.3  | 0.4  | 0.5  | 0.6  | 0.6  | 0.6  | 0.7  | 0.7  | 0.8  | 0.9  | 1.3  |     |

# Supplementary Figure 4

|                                            |     | e                                            |      |      |      |      |      |      |      |      |      |      |      |      |      |      |      |      |      |      |      |      |      |      |      |      |
|--------------------------------------------|-----|----------------------------------------------|------|------|------|------|------|------|------|------|------|------|------|------|------|------|------|------|------|------|------|------|------|------|------|------|
|                                            |     | <i>evoA1-constructs, dSaCas9-target site</i> |      |      |      |      |      |      |      |      |      |      |      |      |      |      |      |      |      |      |      |      |      |      |      |      |
| untreated                                  |     | T                                            | C    | T    | G    | C    | T    | T    | C    | T    | C    | C    | A    | G    | C    | C    | C    | T    | G    | G    | C    | C    | T    | G    | G    | T    |
|                                            | A   | 0.0                                          | 0.0  | 0.0  | 0.0  | 0.0  | 0.0  | 0.0  | 0.0  | 0.0  | 0.0  | 0.0  | 99.7 | 0.0  | 0.0  | 0.1  | 0.0  | 0.0  | 0.0  | 0.0  | 0.0  | 0.0  | 0.0  | 0.0  | 0.0  | 0.0  |
|                                            | C   | 0.0                                          | 99.8 | 0.0  | 0.0  | 99.8 | 0.0  | 0.0  | 99.7 | 0.0  | 99.7 | 99.6 | 0.0  | 0.0  | 99.6 | 99.5 | 99.6 | 0.0  | 0.0  | 0.0  | 99.3 | 99.4 | 0.0  | 0.0  | 0.0  | 0.0  |
|                                            | G   | 0.0                                          | 0.0  | 0.0  | 99.8 | 0.0  | 0.0  | 0.0  | 0.0  | 0.0  | 0.0  | 0.0  | 0.0  | 0.0  | 99.6 | 0.0  | 0.0  | 0.0  | 0.0  | 99.5 | 99.3 | 0.0  | 0.0  | 0.0  | 99.2 | 99.1 |
|                                            | T   | 99.7                                         | 3.0  | 99.8 | 0.0  | 0.0  | 99.7 | 99.7 | 6.1  | 99.7 | 14.6 | 9.0  | 0.0  | 0.2  | 1.2  | 1.8  | 0.7  | 99.5 | 0.1  | 0.1  | 0.0  | 0.0  | 99.3 | 0.3  | 0.1  | 0.0  |
| -                                          | 0.3 | 0.2                                          | 0.2  | 0.2  | 0.2  | 0.2  | 0.2  | 0.2  | 0.2  | 0.2  | 0.2  | 0.3  | 0.3  | 0.3  | 0.4  | 0.4  | 0.4  | 0.5  | 0.6  | 0.6  | 0.6  | 0.7  | 0.7  | 0.7  | 0.8  |      |
| evoA1- <i>BE</i> max<br>Replicate 1        |     | T                                            | C    | T    | G    | C    | T    | T    | C    | T    | C    | C    | A    | G    | C    | C    | C    | T    | G    | G    | C    | C    | T    | G    | G    | T    |
|                                            | A   | 0.0                                          | 0.1  | 0.0  | 0.0  | 0.0  | 0.0  | 0.1  | 0.0  | 0.2  | 0.2  | 99.6 | 0.0  | 0.0  | 0.0  | 0.0  | 0.0  | 0.0  | 0.1  | 0.0  | 0.0  | 0.0  | 0.0  | 0.0  | 0.0  |      |
|                                            | C   | 0.1                                          | 96.4 | 0.0  | 0.0  | 99.1 | 0.1  | 0.0  | 93.3 | 0.0  | 83.9 | 90.4 | 0.0  | 0.0  | 98.4 | 97.8 | 98.9 | 0.0  | 0.0  | 0.0  | 99.4 | 99.3 | 0.0  | 0.0  | 0.0  |      |
|                                            | G   | 0.0                                          | 0.1  | 0.0  | 99.7 | 0.0  | 0.0  | 0.1  | 0.0  | 1.0  | 0.0  | 0.0  | 0.0  | 99.5 | 0.0  | 0.0  | 0.0  | 0.0  | 99.4 | 99.3 | 0.0  | 0.0  | 0.0  | 99.0 | 99.1 |      |
|                                            | T   | 99.7                                         | 3.0  | 99.7 | 0.0  | 0.6  | 99.7 | 99.7 | 6.1  | 99.7 | 14.6 | 9.0  | 0.0  | 0.2  | 1.2  | 1.8  | 0.7  | 99.5 | 0.1  | 0.1  | 0.0  | 0.0  | 99.3 | 0.3  | 0.1  |      |
| -                                          | 0.3 | 0.4                                          | 0.2  | 0.2  | 0.2  | 0.3  | 0.4  | 0.3  | 0.3  | 0.5  | 0.4  | 0.4  | 0.4  | 0.4  | 0.4  | 0.5  | 0.5  | 0.6  | 0.6  | 0.6  | 0.7  | 0.7  | 0.7  | 0.8  |      |      |
| evoA1- <i>BE</i> max<br>Replicate 2        |     | T                                            | C    | T    | G    | C    | T    | T    | C    | T    | C    | C    | A    | G    | C    | C    | C    | T    | G    | G    | C    | C    | T    | G    | G    | T    |
|                                            | A   | 0.0                                          | 0.1  | 0.0  | 0.0  | 0.1  | 0.0  | 0.0  | 0.0  | 0.3  | 0.0  | 99.6 | 0.0  | 0.0  | 0.0  | 0.0  | 0.0  | 0.0  | 0.0  | 0.0  | 0.0  | 0.0  | 0.0  | 0.0  | 0.0  |      |
|                                            | C   | 0.0                                          | 96.8 | 0.0  | 0.0  | 99.1 | 0.0  | 0.0  | 94.5 | 0.0  | 86.6 | 92.5 | 0.0  | 0.0  | 98.3 | 98.1 | 99.0 | 0.0  | 0.0  | 0.0  | 99.3 | 99.3 | 0.1  | 0.0  | 0.0  |      |
|                                            | G   | 0.0                                          | 0.1  | 0.0  | 99.7 | 0.0  | 0.0  | 0.1  | 0.0  | 0.8  | 0.0  | 0.1  | 99.5 | 0.0  | 0.0  | 0.0  | 0.0  | 0.0  | 99.4 | 99.3 | 0.0  | 0.0  | 0.0  | 99.0 | 99.1 |      |
|                                            | T   | 99.3                                         | 2.8  | 99.8 | 0.1  | 0.6  | 99.8 | 99.7 | 5.0  | 99.7 | 12.0 | 7.0  | 0.0  | 0.1  | 1.4  | 1.5  | 0.6  | 99.5 | 0.1  | 0.1  | 0.0  | 0.0  | 99.3 | 0.3  | 0.1  |      |
| -                                          | 0.7 | 0.3                                          | 0.2  | 0.2  | 0.2  | 0.2  | 0.3  | 0.3  | 0.3  | 0.3  | 0.4  | 0.3  | 0.3  | 0.3  | 0.3  | 0.4  | 0.4  | 0.5  | 0.6  | 0.6  | 0.6  | 0.6  | 0.7  | 0.7  |      |      |
| evoA1- <i>BE</i> max<br>Replicate 3        |     | T                                            | C    | T    | G    | C    | T    | T    | C    | T    | C    | C    | A    | G    | C    | C    | C    | T    | G    | G    | C    | C    | T    | G    | G    | T    |
|                                            | A   | 0.0                                          | 0.1  | 0.0  | 0.0  | 0.1  | 0.0  | 0.0  | 0.1  | 0.0  | 0.3  | 0.1  | 99.7 | 0.0  | 0.0  | 0.1  | 0.1  | 0.0  | 0.0  | 0.1  | 0.0  | 0.0  | 0.0  | 0.0  | 0.0  |      |
|                                            | C   | 0.0                                          | 95.7 | 0.0  | 0.1  | 98.7 | 0.0  | 0.0  | 92.4 | 0.0  | 79.8 | 88.6 | 0.0  | 0.0  | 97.7 | 97.1 | 98.5 | 0.0  | 0.0  | 0.0  | 99.5 | 99.4 | 0.1  | 0.0  | 0.0  |      |
|                                            | G   | 0.0                                          | 0.1  | 0.0  | 99.7 | 0.0  | 0.0  | 0.0  | 0.1  | 0.0  | 1.3  | 0.0  | 0.0  | 99.6 | 0.0  | 0.0  | 0.0  | 0.0  | 99.4 | 99.4 | 0.0  | 0.0  | 0.0  | 99.2 | 99.0 |      |
|                                            | T   | 99.7                                         | 3.8  | 99.8 | 0.0  | 1.0  | 99.8 | 99.8 | 7.1  | 99.8 | 18.4 | 11.0 | 0.0  | 0.1  | 2.0  | 2.5  | 1.1  | 99.6 | 0.1  | 0.1  | 0.0  | 0.0  | 99.4 | 0.2  | 0.1  |      |
| -                                          | 0.3 | 0.3                                          | 0.1  | 0.2  | 0.2  | 0.2  | 0.2  | 0.3  | 0.2  | 0.2  | 0.3  | 0.3  | 0.3  | 0.3  | 0.3  | 0.3  | 0.4  | 0.4  | 0.5  | 0.5  | 0.5  | 0.5  | 0.6  | 0.7  |      |      |
| evoA1- <i>seBE</i> -<br>IRES +Rap Rep<br>1 |     | T                                            | C    | T    | G    | C    | T    | T    | C    | T    | C    | C    | A    | G    | C    | C    | C    | T    | G    | G    | C    | C    | T    | G    | G    | T    |
|                                            | A   | 0.0                                          | 0.1  | 0.0  | 0.0  | 0.0  | 0.0  | 0.0  | 0.0  | 0.1  | 0.0  | 99.6 | 0.0  | 0.0  | 0.1  | 0.0  | 0.0  | 0.0  | 0.0  | 0.0  | 0.0  | 0.0  | 0.0  | 0.0  | 0.0  |      |
|                                            | C   | 0.0                                          | 99.5 | 0.0  | 0.0  | 99.7 | 0.0  | 0.0  | 98.6 | 0.0  | 95.5 | 98.1 | 0.0  | 0.0  | 99.4 | 99.3 | 99.5 | 0.0  | 0.0  | 0.0  | 99.3 | 99.2 | 0.1  | 0.0  | 0.0  |      |
|                                            | G   | 0.0                                          | 0.0  | 0.0  | 99.2 | 0.0  | 0.0  | 0.0  | 0.4  | 0.0  | 0.0  | 99.5 | 0.0  | 0.0  | 0.0  | 0.0  | 0.0  | 0.0  | 99.3 | 99.2 | 0.0  | 0.0  | 0.0  | 99.0 | 99.1 |      |
|                                            | T   | 99.6                                         | 0.3  | 99.8 | 0.0  | 0.1  | 99.7 | 99.7 | 1.0  | 99.7 | 3.6  | 1.6  | 0.0  | 0.1  | 0.3  | 0.3  | 0.1  | 99.5 | 0.1  | 0.1  | 0.0  | 0.0  | 99.2 | 0.2  | 0.1  |      |
| -                                          | 0.3 | 0.2                                          | 0.2  | 0.2  | 0.2  | 0.2  | 0.3  | 0.3  | 0.3  | 0.3  | 0.3  | 0.3  | 0.3  | 0.3  | 0.4  | 0.4  | 0.5  | 0.6  | 0.6  | 0.7  | 0.7  | 0.8  | 0.8  | 0.9  |      |      |
| evoA1- <i>seBE</i> -<br>IRES +Rap Rep<br>2 |     | T                                            | C    | T    | G    | C    | T    | T    | C    | T    | C    | C    | A    | G    | C    | C    | C    | T    | G    | G    | C    | C    | T    | G    | G    | T    |
|                                            | A   | 0.0                                          | 0.0  | 0.0  | 0.0  | 0.0  | 0.0  | 0.0  | 0.0  | 0.0  | 0.0  | 0.0  | 0.1  | 0.0  | 0.0  | 0.0  | 0.0  | 0.0  | 0.0  | 0.1  | 0.0  | 0.0  | 0.0  | 0.0  | 0.0  |      |
|                                            | C   | 0.0                                          | 99.5 | 0.0  | 0.0  | 99.8 | 0.0  | 0.0  | 98.9 | 0.1  | 95.9 | 98.0 | 0.0  | 0.0  | 99.5 | 99.4 | 99.6 | 0.0  | 0.0  | 0.0  | 99.5 | 99.4 | 0.1  | 0.0  | 0.0  |      |
|                                            | G   | 0.0                                          | 0.0  | 0.0  | 99.8 | 0.0  | 0.0  | 0.0  | 0.0  | 0.4  | 0.0  | 0.1  | 99.7 | 0.0  | 0.0  | 0.0  | 0.0  | 0.0  | 99.5 | 99.4 | 0.0  | 0.0  | 0.0  | 99.2 | 99.2 |      |
|                                            | T   | 99.4                                         | 0.3  | 99.9 | 0.0  | 0.1  | 99.9 | 99.9 | 0.9  | 99.8 | 3.5  | 1.8  | 0.0  | 0.1  | 0.3  | 0.3  | 0.1  | 99.7 | 0.1  | 0.2  | 0.1  | 0.0  | 99.4 | 0.2  | 0.1  |      |
| -                                          | 0.6 | 0.1                                          | 0.1  | 0.1  | 0.1  | 0.1  | 0.1  | 0.1  | 0.2  | 0.2  | 0.2  | 0.2  | 0.2  | 0.2  | 0.2  | 0.2  | 0.3  | 0.3  | 0.4  | 0.4  | 0.5  | 0.5  | 0.6  | 0.7  |      |      |
| evoA1- <i>seBE</i> -<br>IRES +Rap Rep<br>3 |     | T                                            | C    | T    | G    | C    | T    | T    | C    | T    | C    | C    | A    | G    | C    | C    | C    | T    | G    | G    | C    | C    | T    | G    | G    | T    |
|                                            | A   | 0.0                                          | 0.1  | 0.0  | 0.0  | 0.0  | 0.0  | 0.0  | 0.0  | 0.1  | 0.1  | 99.7 | 0.0  | 0.0  | 0.0  | 0.0  | 0.0  | 0.0  | 0.0  | 0.0  | 0.0  | 0.0  | 0.0  | 0.0  | 0.0  |      |
|                                            | C   | 0.0                                          | 98.9 | 0.0  | 0.0  | 99.5 | 0.0  | 0.0  | 98.0 | 0.1  | 94.1 | 96.9 | 0.0  | 0.0  | 99.2 | 99.0 | 99.2 | 0.0  | 0.0  | 0.0  | 99.4 | 99.4 | 0.1  | 0.0  | 0.0  |      |
|                                            | G   | 0.0                                          | 0.0  | 0.0  | 99.8 | 0.0  | 0.0  | 0.0  | 0.0  | 0.4  | 0.0  | 0.0  | 99.6 | 0.0  | 0.0  | 0.0  | 0.0  | 0.0  | 99.5 | 99.4 | 0.0  | 0.0  | 0.0  | 99.1 | 99.2 |      |
|                                            | T   | 99.7                                         | 0.8  | 99.8 | 0.0  | 0.3  | 99.8 | 99.8 | 1.7  | 99.7 | 5.2  | 2.7  | 0.0  | 0.1  | 0.5  | 0.6  | 0.4  | 99.6 | 0.1  | 0.1  | 0.0  | 0.0  | 99.3 | 0.2  | 0.1  |      |
| -                                          | 0.2 | 0.2                                          | 0.2  | 0.2  | 0.2  | 0.2  | 0.2  | 0.2  | 0.2  | 0.2  | 0.3  | 0.3  | 0.3  | 0.3  | 0.3  | 0.4  | 0.4  | 0.4  | 0.5  | 0.6  | 0.6  | 0.6  | 0.7  | 0.7  |      |      |
| evoA1- <i>seBE</i> -<br>IRES +Rap Rep<br>1 |     | T                                            | C    | T    | G    | C    | T    | T    | C    | T    | C    | C    | A    | G    | C    | C    | C    | T    | G    | G    | C    | C    | T    | G    | G    | T    |
|                                            | A   | 0.0                                          | 0.0  | 0.0  | 0.0  | 0.0  | 0.0  | 0.0  | 0.0  | 0.1  | 0.1  | 99.6 | 0.0  | 0.0  | 0.0  | 0.0  | 0.0  | 0.0  | 0.0  | 0.0  | 0.0  | 0.0  | 0.0  | 0.0  | 0.0  |      |
|                                            | C   | 0.0                                          | 99.8 | 0.0  | 0.0  | 99.8 | 0.0  | 0.0  | 99.8 | 0.1  | 99.6 | 99.7 | 0.0  | 0.0  | 99.7 | 99.6 | 99.6 | 0.0  | 0.0  | 0.0  | 99.5 | 99.3 | 0.0  | 0.0  | 0.0  |      |
|                                            | G   | 0.0                                          | 0.0  | 0.0  | 99.7 | 0.0  | 0.0  | 0.0  | 0.0  | 0.0  | 0.0  | 0.0  | 0.1  | 99.4 | 0.0  | 0.0  | 0.0  | 0.0  | 99.3 | 99.1 | 0.0  | 0.0  | 0.0  | 98.8 | 98.9 |      |
|                                            | T   | 99.3                                         | 0.0  | 99.8 | 0.1  | 0.0  | 99.8 | 99.8 | 0.0  | 99.7 | 0.1  | 0.0  | 0.0  | 0.2  | 0.0  | 0.0  | 0.0  | 99.6 | 0.2  | 0.2  | 0.0  | 0.0  | 99.4 | 0.4  | 0.1  |      |
| -                                          | 0.3 | 0.1                                          | 0.1  | 0.2  | 0.2  | 0.2  | 0.2  | 0.2  | 0.2  | 0.2  | 0.3  | 0.3  | 0.3  | 0.3  | 0.3  | 0.4  | 0.4  | 0.5  | 0.5  | 0.5  | 0.5  | 0.6  | 0.7  | 0.8  |      |      |
| evoA1- <i>seBE</i> -<br>IRES +Rap Rep<br>2 |     | T                                            | C    | T    | G    | C    | T    | T    | C    | T    | C    | C    | A    | G    | C    | C    | C    | T    | G    | G    | C    | C    | T    | G    | G    | T    |
|                                            | A   | 0.0                                          | 0.0  | 0.0  | 0.0  | 0.0  | 0.0  | 0.0  | 0.0  | 0.0  | 0.0  | 0.0  | 99.6 | 0.0  | 0.0  | 0.1  | 0.0  | 0.0  | 0.0  | 0.0  | 0.0  | 0.0  | 0.1  | 0.0  | 0.0  |      |
|                                            | C   | 0.0                                          | 99.8 | 0.0  | 0.0  | 99.8 | 0.0  | 0.0  | 99.7 | 0.0  | 99.6 | 99.6 | 0.0  | 0.0  | 99.6 | 99.6 | 99.6 | 0.0  | 0.0  | 0.0  | 99.3 | 99.3 | 0.1  | 0.0  | 0.0  |      |
|                                            | G   | 0.0                                          | 0.0  | 0.0  | 99.7 | 0.0  | 0.0  | 0.0  | 0.0  | 0.0  | 0.0  | 0.0  | 0.1  | 99.4 | 0.0  | 0.0  | 0.0  | 0.0  | 99.3 | 99.1 | 0.0  | 0.0  | 0.0  | 98.8 | 98.9 |      |
|                                            | T   | 99.5                                         | 0.0  | 99.8 | 0.0  | 0.0  | 99.8 | 99.8 | 0.0  | 99.7 | 0.1  | 0.1  | 0.0  | 0.2  | 0.1  | 0.0  | 0.0  | 99.6 | 0.2  | 0.3  | 0.1  | 0.0  | 99.3 | 0.5  | 0.3  |      |
| -                                          | 0.5 | 0.2                                          | 0.2  | 0.2  | 0.2  | 0.2  | 0.2  | 0.2  | 0.2  | 0.2  | 0.3  | 0.3  | 0.3  | 0.3  | 0.3  | 0.4  | 0.4  | 0.5  | 0.5  | 0.6  | 0.6  | 0.6  | 0.7  | 0.7  |      |      |
| evoA1- <i>seBE</i> -<br>IRES +Rap Rep<br>3 |     | T                                            | C    | T    | G    | C    | T    | T    | C    | T    | C    | C    | A    | G    | C    | C    | C    | T    | G    | G    | C    | C    | T    | G    | G    | T    |
|                                            | A   | 0.0                                          | 0.0  | 0.0  | 0.0  | 0.0  | 0.0  | 0.0  | 0.0  | 0.0  | 0.0  | 0.0  | 99.7 | 0.0  | 0.0  | 0.0  | 0.0  | 0.0  | 0.0  | 0.0  | 0.0  | 0.0  | 0.0  | 0.0  | 0.0  |      |
|                                            | C   | 0.0                                          | 99.7 | 0.0  | 0.0  | 99.8 | 0.0  | 0.0  | 99.6 | 0.0  | 99.5 | 99.5 | 0.0  | 0.0  | 99.6 | 99.6 | 99.6 | 0.0  | 0.0  | 0.0  | 99.5 | 99.5 | 0.1  | 0.0  | 0.0  |      |
|                                            | G   | 0.0                                          | 0.0  | 0.0  | 99.8 | 0.0  | 0.0  | 0.0  | 0.0  | 0.1  | 0.0  | 0.0  | 99.7 | 0.0  | 0.0  | 0.0  | 0.0  | 0.0  | 99.5 | 99.4 | 0.0  | 0.0  | 0.0  | 99.3 | 99.2 |      |
|                                            | T   | 99.7                                         | 0.1  | 99.8 | 0.0  | 0.0  | 99.8 | 99.8 | 0.2  | 99.7 | 0.2  | 0.2  | 0.0  | 0.1  | 0.1  | 0.1  | 0.1  | 99.7 | 0.1  | 0.1  | 0.0  | 0.0  | 99.4 | 0.1  | 0.1  |      |
| -                                          | 0.3 | 0.1                                          | 0.1  | 0.1  | 0.2  | 0.2  | 0.2  | 0.2  | 0.2  | 0.2  | 0.2  | 0.3  | 0.3  | 0.3  | 0.3  | 0.3  | 0.4  | 0.5  | 0.5  | 0.5  | 0.5  | 0.6  | 0.7  |      |      |      |



## Supplementary Note: Vector Sequences

### Bacterial DNA deaminase expression plasmids

AID\*-pET41  
AID\*-INS1 pET41  
AID\*-INS2 pET41  
AID\*-INS3 pET41  
AID\*-INS- pET41  
AID\*-INS+ pET41  
AID\*-SPL2 pET41  
AID\*-SPL2<sub>N</sub> pET41  
AID\*-SPL2<sub>C</sub> pET41  
A3A-pET41  
A3A-INS2 pET41

### Mammaian DNA deaminase expression plasmids

A3A-INS2 pLEXm  
A3A(E72A)-INS2 pLEXm  
A3A-SPL2<sub>N</sub> pLEXm  
A3A-SPL2<sub>C</sub> pLEXm

### Intact base editor constructs

evoA1-BE4max  
AID'-BE4max  
A3A-BE4max

### Split engineered base editor constructs

evoA1-seBE-T2A  
AID'-seBE-T2A  
A3A-seBE-T2A  
evoA1-seBE-IRES  
AID'-seBE-IRES  
A3A-seBE-IRES

### gRNA and control constructs

LRcherry 2.1T empty  
LRcherry 2.1 neomycin  
LRG empty  
dSaCas9-sgRNA

### Lentiviral intact and split engineered constructs

Lentiviral evoA1-BE4max  
Lentiviral seBE<sub>N</sub> + sgRNA  
Lentiviral seBE<sub>C</sub>

# Supplementary Vector Sequences

## AID\* pET41

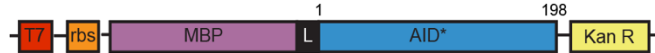

taatacgaactcaactataggggaatttgtgagcggataacaattcccctctagaataattttgttttaactttaagaaggagatatacatAtgaaatcgaagAAGTAACCTGGTAATCT  
ggatataacggcgataaagctataaccgtctcgctgaagtcggttagaatttcgagaaagataaccggaataaagtcaccgttgagcatccggataaacggaagagaatccccag  
gttgcggcaactggcagtgccctgacataatctctgggcaacacgaccgctttgggtgctacgctcaactctggcctgttggctgaaatcaccgggcaaaagcgtccaggaaga  
gtagcctgttacctgggtgaccgtacgtttacaacggcaagctgattgcttaccgatcgtggtgaagcgttatcgtgatttatacaaaagatctgctgccaaccggcaaaac  
ggaaagagatccggcgtggataaaagaactgaaagcgaaggttaagagcgcctgatgttcaacctgcaagaccgcttcaactggcctgctgctgagggggttatgct  
tcaagatgaaacggcaagtaacgacattaaagacgtggcgtggataacgctggcggaaagcgggtgacacttccctgggtgacactgatataaaacaaacacatgatgcagac  
cgtatctccatcgcagaagctgctttaataaagggcaaacagcgtgacctcaacggccggtggcgtggtccaacatcgacaccagcaagtgaaattatggtgtaacggctactgc  
cgacttcaagggcacaacctcaaacctctgtttggcgtgctgagcgcaggtatcaacggcgcagctcgcgaacaagagctggcaaaagagcttcccgaaaagcttccctgctgactgat  
gaaggtctggaagcgttaataaagacaaccgctgggtggcgtgacgtgacgtcttcaacggcgcagctgacgctcaacttgcagcgcctgagccgccttcccttctctgactgat  
ggaaatcagcccgaacatccgcagatgctccgtttctgggtacgctggaactcggtctgacgcgcagcggctcgtagactgtagagccctgaaagacgcgcagacta  
atctgagctgaaacaacaacaataacaataacaacaacctgggtgaggggaagatttcaagaattcgaaaacctgattttcaggggctcgacaATGGATAGCTGCTGATGAAC  
CGTCTGTAATTTCTGATCAGTTAAAAACGTGCGTTGGCGGAAAGGCCGCTGCAAGAACCTATCTGTCGCTATGTGGTAACCGTCGTGATAGCCGACCAGCGAAAGCGTATTTGG  
CTATCTGCGTAACAAAACGGGTGCCATGTGGAACCTGCTGTTCTGCGTATATTAGCCATTGGGATCTGGATCCGGGCCGCTGCTATCTGCTGACTGGTATTACAGCTGGAGCCGT  
GCTATGATTCGGCGGCTCATGTGGCGGATTTCTGCGTGGCAACCCGAACCTGAGCCTCGCTATTTTACCGCGGCTCTGATTTTTCGGAGcGcGgaGgCGTGAACCGGAAGCCGTG  
CGTCTGCTGGCGGAACGGCGGATGAGATTCGCTATTATGACCTATAAGATATTGAATTTCTGGAACACCTTTGTGGAAAACCATGAGCTACCTTTAAAGCGTGGGAAGCCGTGCA  
TGAANAACAGCGTCTGAGCCGTCAGCTGCTGCTATTCTGCTGGCGCTGATGAAGTGGATGATCTGCGTGTAGCCGTTTCTGACCTGGCCGTGAGcttaggctgctaaacaaag  
ccgaaaaggaagctgagttgctgctgccaccgctgagcaataactagcataaccttgggctcctaaacgggtctttaggggttttttctggaaggggaactatccccgattg  
ggaaatgggagcgcgcctgtaaccccattttgaaaaagcggcttctgttaaggaaggagaaacactcaccgagggcagttccatagggatggcaagactctggtatcggctccgattccg  
ttctccgcccacttccggcgtttcccccgtcaagctcctaaatccggggctccccctttaggggttccgattttagtcttaccgcaacctgacccccaaaaaacttgattaggggtgatggctc  
cgtgagctggcagctcgcctgatgacaggtttttccccccttggcgttggagctcagcttccctttaaagtggaactcttgttccaaactggaacaaacactcaaccttccggtttc  
ctttttgatataagggatttttccgcttttccgctatgttggtaaaaaatgagctgatttaacaaaaatttaacgcgaattttaacaaaaatataacgtttacaatttccaggttggact  
tttccgggaaatgtgcggcaacctatgtttattttctaaatacattcaaatatgtagctcctgatgaattaaattcttaaaaaactcactcagagcacaatcaaatgaaactgcaatt  
tattcactcagattatcaaataccatattttgaaaaagcggcttctgttaaggaaggagaaacactcaccgagggcagttccatagggatggcaagactctggtatcggctccgattccg  
actcgtcccaactcaatacaaacatttaatttccccctctgtaaaaaatlaagggtatacaagtgagaatacaccatgagtgagcagctgaaatccgggtgagaatggcaaaagttatgcatctt  
tttccagacttggtaaacggcagcactacgctcgtcacaatacaactcagctcaacaaccaccttattcaattctgtgattgcgctgagcaggaacaaacactcagcgtcgtgtaa  
aagacaattcaaaaacaggaatcgaatgcaaccggcgcaggaacactgcaagcgcatacaaatatttcaactgaatcaggatattctctataaacctggaatgctggttttccgggg  
atccgagttggtgagtaaccatgcatcaggatgagataaaaactgctgttgcggagagcagataaattccgtcagccagtttagctcagaccatctcatctgataaacacttggc  
aacgctacctttccatggtttcagaaacaactctggcgcactggccttcccatcaaatcagtagatttgcgacctgattgcccagacattatcggagaccaatataacctataaat  
cagcatccatggtgaaatttaactcggcccttagaagcaagcgtttcccgcttgaataggtcactaacacccttcttattactgttattgtaaacgagacagtttattgttcatgacca  
aatcccttaacgtgagttttctgctcactgagcgtcagaccctgtagaaaagatacaagggatctctttagatcoctttttctcgcgttaactcgtcctgcaaaaacaaaaaacac  
cgctaccagcgggtggtttgtttgcccgtacaagagctacaaactcttttccgaaggtaactggctcagcagagcgcagatcacaaaactctctctagtgttagcctagttagg  
caccactcaagaactctgtagaccgctacatccctcgtctgctaatcctgttaccagtgctgctgccagtggcagataagctgctcttaccgggttggactcaagacagatggt  
accggataaaggcgcagcggctcgggctgaacgggggttctgtgcacacagcccagcttggagcgaacgacctacaccgaactgagatacctacagctgagctatgagaagcgcaccg  
ttcccgaaggagaaaagggcagaggtatccggtaagcggcagggctcgaacagggagagcgcacgagggagcttccaggggaaacccctggtatctttatagctcgtcgggtttcgc  
cacctctgacttgagcgtcgtattttggatgctcgtcagggggcgaggcctatgaaaaaacccagcaacgcgcctttttacggttccctggccttttctggccttttctcact  
gttctttccctgcttatccccctgatctgtggataaccgcttatccccctttgagtgagctgataaccgctcgcgcagccgaacgaccgagcgcagcagctcagtgagcggaaagcgg  
aagagcctgatgaggtatcttctctcactcagcctctgtcgggtatttcaacacgcataataggtgcaactcactcaaatcgtctctgatccgcatggtttagccactataacactc  
gctatcgtcactgactgggttcaatggctgcgcccacaccggcaaccccctgacgcccctgacgggcttctctcctcccgcacccgcttaccagacaagctgtgaccgctccg  
ggagctgcatgctcagaggttttccactcctacccgaaacgcgcagggcagctcgggttaagctcatcagcgtggtcgtggaagcattcaacagatgctgcctggttcatccgctcc  
agctcgtttaggttttccagaaagcgttaaggtctgataaaagcggccatgtaagggcggtttttcctggttggctcactgatgctcctgtaagggggatttctggttcat  
ggggtaatgataccgatgaaacagagagaggtgctcagcatagcgggttactgatgatgaacatgcccggttactggaacgttggaggggttaaacactggcgttggatggcgggg  
accagaaaaaactcactcagggctcaatgcaagcgtctgttaataacagatgtaggttccacagggtagccagcagcagatcctgcatgagatccggaacataatgggtgcaagggcgt  
gacttccgctttccagactttacgaaacgcgaaacccaagaccatctatgttggctcaggtcgcagacgttttgcagcagcagctcctcactgtctcctgctcgcgttatcgttgattc  
atctgttaaccagtaaggaacccccccagcctagcccgggtctcaacgacagggagcagatcactgtagctgaccccgcccaccggaggagctgactgggttgaaggtcctca  
agggcatcggctcagatcccggctcaatgagtgactaactacatttaattgcttgcgctcactgccccttccagctcggaacactcgtgcccagctgcattaatgaatggc  
caacgcgccccagagggcgttgcgtattggcgcccagggtggtttctcttccaccagtgagacggcaacagctgattgcccctcaccgcttggccctgagagagtgcagcaagc  
ggtcccagctggtttgccccagcagcggcaaaactcgtttgatgggtggttaacggcgggatataaacatgagctgctcgggtatcgtctgataccactaccagagatgcccaccca  
cgcagcccggactcggtaatggcggcattggcccagcgcactctgactgtggaacacagcaatcgcagtggaacgaatgccctcactcagcattgcatggtttgtgaaacccgga  
catggcactccagctcccttcccgttccgctatcggctgaaattgattgagagtgagatatttatgccagccagccagcagcagcgcgcccagagacagaacttaatggcccgcataca  
cgcgatttggctggtaacccaatgcagccagatgctccagcccagctcgcgtacccgtctccatgggagaaaataaactggtgaggggtgctggtaagagacatacaaaaataacgccc  
ggaacttagtgaggcagcttccacagcaatggcactcctggtcactccagcagataggttaatgatcagccactgacgcggttgcgagagaagattgcaaccgccccttaccagctcc  
gaccccctcgttctaccatgcacaccaccagcgtggcaaccagttgtagcggcgagattaaatcggcggcaacaaatttgcagcggcgcgtgcaagggccagactggaagttgcaacgc  
caatcagcaacagctggttggcccaggttgttgcacagcgggttgggaaatgtaattcagctccgcatcgcgccttccacttttcccgggttttgcagaaacgtggctggctgg  
ttcaccagcgggaaacggctgatagagacaccggcaactctgcgacatcgtataacgttactggttcaactcaccacctgaattgactcctcctcccggcgtatcactgccat  
accgcaaaaggttttgcgcccactgatggtgctccgggtctcgcagctctccccttatgcgactcctgcattaggaaagcagcccagtagtaggttagggccttgagcaccgcccgcga  
agaaatggtgcatgcaagagatggcggcacaacagctcccggcggcaggggctgcaccataccaccgcaaaaagcgcctatgagcccgaagtgccagcccagcttcccactc  
ggtgatgctggcagatagggcggcaaccgcaacctgtggcccgtgtagccggccagtagcctccggcgtagagatcgagatcgatctcagctcccggcaaa



# Supplementary Vector Sequences

## AID\*-INS2 pET41

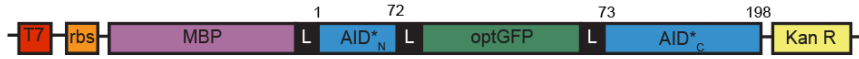

taatacgaactcaactatagggaatttgtgagcggataacaattccccctctagaataaattttgtttaactttaagaaggagatatacatAtgaaatcgaagAAGGTAACTGGTAACTCT  
 ggattaaacggcgataaaagctataaacggtctcgctgaagtcggtaagaataatcagaaaagataaccggaatataaagtcacccgttgagcatccggataaacggagaagataatccacag  
 gtttcggcgcaactggcgtgatggccctgacatatactctctgggacacagaccgctttgttggtacgtctcaactctggcctgttggtgaaatcaccggcaaaagcggtccagggacaagct  
 gttaccggtttacctgggtagcgtaagttacaacggcaagctgatgtctaccogctgctgtgaagacgttatctgctgattatacaaaaagatctgctgcccgaaccggcaaaaacct  
 gggagagatccccggcgtggataaagaactgaagcgaaaggtgaagagcgctgattgtcaactcgaagaaccgtactcactgcccgtgatgctgctgacgggggttatgct  
 tcaagatataaaaacgcaagtcacgacattaaagacgtggcgtggataaacgctggcggagacgtctgacaccgcccggctcactctcgtggtgacctgattaaaacaaacacatgaatcgagac  
 cgattactccatcgcagaagctgcctttaataaaggcgaacagcgatgaccatcaacggcccgtggcgtggttccaacatcgaccacagcaaatgattatgggtaacggctactgc  
 qcacctcaagggctaacatcaaacacgcttcgtttggcgtgctgagcgcaggtatataacgcccagtcgaacaagaagctgcccagaagaagcttctcgaataactatctgctgactgat  
 gaaggtctcaaacggcgttataaagaacaacacgctgggtggcgtgacggtcctgacgagacgtcctgacggaagctcagcgtatggcgaagaagctccactatggcgaacatggaaaacggcgaagaag  
 tgaaatcatgcccgaacatcccagatgctcgcctttctggtatgacctgctgactcggtgatcaaacggcccagcggctcgtcagactgctgaagcctgaaagacgcgcagacta  
 atctcgactcgaacaacaacaataacaataacaacaacacctcgggagtgcaggggaagatttcagaattcogaaaacvtgattttcaggggtcgacaATGGATAGCTCGTGATGAAC  
 CGTCGTGAATTTCTGTATCAGTTTAAAAACGTGCGTGGGCGCAAAGGCCGTCGTGAACCTATCTGTGCTATGTGGTGAACCTCGTGTAGCCGACCAGCGAAAGCCTGGATTTTGG  
 CTATCTCGCTAACAAAACGGCTGCCATGTGGAACGTCTGTCTCGCTATATTAGCGATTGGGATCTGGATCCGGGATCCGCTGGCTCCGCTGCTGTTCTCGCGAAATTCATGAGCA  
 AAGGAGAAGAACTTTTCACCTCGAAGTTGTCCTCAATTTTGTGAATTAGATGAGTGGTATGGCAACAATTTCTGTGTCAGAGGAGAGGTTGAAAGTGATCTCAATCGGAAAACCTC  
 ACCCTTAATTTATTTGCACTACTGGAAGAACTACCTGTTCCATGGCCAACTATGTCACTACTCTGACCTATGGTGTCAATGCTTTTCCCGTATCCGGATCAGATGAAAGGCATGA  
 CTTTTTCAAGATGCCATGCCGAAGGTTATGTCAGGAACGCCTATATCTTTCAAGGATGACCGGAAATCAAGACGCGTGTGATGCAAGTTGAAAGGTTGATGCTATTGATGA  
 GTATCGAGTTAAAGGGTACTGATTTTAAAGAAGATGGAAACACTTCGGAACACAACTCGAGTCAACTTTAATCACAATGPTATACATCAGCCGACAAACAAAAGAATGGAATC  
 AAAGCTAACTTCACAGTTCGCCCACACAGTTGAAGATGGTTCGCTTCAACTAGCAGACCATATCAACAAAATACTCCAATTTGGCGATGCCCCGCTGCTTTTACCAGACAACATTACTT  
 GTCAACCAAGACTGGCTTTCGAAAAGTCCCAACGAAAAGGTTACCCGTGAACACTGCTCATGACTGTGATAATGCTGCTGATAATGCTGTAAGGTTTACGAGACTCTGGAGCGCGTG  
 GAAGTGTGCGGAGGTAGCAGCGCGTTGCTATCGTGTACCTGTTTATCAGCTGGAGCCGCTGCTATGATGCGCGGCTCATGTTGGCGGATTTTCTGCGTGGCAACCCAACTGACG  
 CTGGCTATTTTACCCGCGCTGTGATTTTTCGAAGCGGCAAGCTGAACCGGAAAGGCTGCGTGTCTGGCGGAAGCGGCGTGCAGATTCAGGATTAAGACATAAAGATTTATGA  
 ATATGTCTGGAACACCTTTGTGGAAAACCATGgAGTACTTTTAAAGCGTGGGAAGGCTGCATGAAACAGCGTGGCTGTGAGCGGTCAGTGGCTGTATTCTGCTGCCGCTGTATG  
 AAGTGGATGATCTGCTGTATGCGTTCGTAACCCTGGGCCTGAGCcttagctctaaacaagaaccgcaaaagagagctgagttggctgctgcccacctgagcacaataactgacataaac  
 cttggggccctcaaacggtttttagggggttttttgctgaaagggaaactataaccgattggcgaaatgggacgcccgtctgagccgcatataagcgtgcagcttaagcgtggggttatc  
 gcaagctgacccctacacttgcacgcccactgaccccgtctctctgctttctctcctctctcctgcccactctccggctcaagctcctaataatcgggggctccccct  
 agggttcogattttagtgccttacggcaccctcgaccocaaaacttatagggtgatgagttctgaaagctgtgagccactgcocctgatagcagcgtttttccocctttgaccccttggattoca  
 cgttctttaatagtggactctgtttccaactggaacaacactcaacctatctgcttcttctttgattataagggattttgcccgtattcggcctattggttaaaaatgagctg  
 atttaacaacaaatctaacggcaatttttaacaaatataaacgtttacaattcaagttggcactttccgggaattgctgcccgaacccactattggtttattttcaataacatactcaaa  
 atgtatcccccttaagaatttcaattcttgaataaactcactcgagocatacaaatcttcttatcagattatcaatatacactatttttgaaaaagcggcttctgttaaggaa  
 ggagaaaactccccaggcagttcccataggatggaagatcctggtatcgtgctgagtcgactcgtccacatcaatacaacctataattttccccctctcaaaaataaaggtttatc  
 aagtggaaaactcaactgagcgaactggaactcagctggaaatggcaaaagttttagoattctcttccagaatttggtaaacagggccagocactaocgtgctcaataactcactcact  
 caacaaaccgcttatctctgctgattggcgcctgagcggagacgaatcagcgatcgctgttaaaaggacaattcaaaacaggaatcgaatgcaacggccgcaaggcaactgccagcgca  
 tcaacaatattttcaactgaatcaggaattctcttcaataactggaatcgtgattttccccgggagctggtagtaaacctgcatcactcagggatcagggataaaaatgcttgatgtg  
 cggaaagcgcaataaattccgttcgacggttttagtctgaccactctcatctgtaacatcattggcaacgctcaacctttgcoactgcttcagaacaactcctggccagctcctcccataca  
 atcogtagatttctgcaactgattggccgacatctcggcagccacttaatacactataaactcagcactcctggtgaaattaactcggccttagagcaagagcttcccgttgaata  
 tggctcatcaaccccccttggatctctttatgtaagcagacagcttttattgttcaatgacaaatccccttaacgtgagttttctgctcaactgacgcccgtgcaaaagatca  
 aagatctctctgagatctctttctgctgctaaatcaccagcctaccagcggtggtttgtttgcccgatcaagagctaccaactcctttccgaag  
 gtaactggctcagcagagcgcaatacaaaactgctcctctagttagcggctgagtaggcccaccactcaagaaactcgtagcaccgccaatacctcgtccttaacccg  
 acctggctgctgcaagtgggcgaatgaagctgtcttaacggggttggactcaagacgtagttaccggataaaggccagccgctgggctgaacggggggttcgtgcaacaagcccagct  
 tggagcgaacgacctacaccgaactgagatacctacagcgtgagctatagaaaagcgccacgctcccgaagggagaaagcgagacaggtatccggttaagcggcagggctcggaacagga  
 gagcagcaggggagcttccaggcggcaaacccctggtatcctttatagtcctgtctgcccactcctgacttgagcgtgagtttttgtagctcgtcagggggcgagcctatg  
 gaaaacgcagcgaacggccttttaacggctcctggcttttgcctgcttctcctcgttatccccgtgatctggtgataaccgtattaccgccccttgag  
 gagctgataccgctcggcagccgaacgaccgagcgagcgagtagttagcgaggaagcgggaagagcggctgatgggattttctcctacgcatcgtgaggtatttcaacccg  
 atatatgtcactcctcagtaaaactcctcctgatgcccagatagttaagccagatatacactcccgtatcctcgtgactgggtcactggcctgaccccgagaccgcccacaccgctg  
 acggcccctgagggctgtgctcctcggcatccgctacagacaaagctgtagcctcggagcctgcatggtcagaggttttcaacgctcatcaccgaaacgcgcgagccagctg  
 cgttaaacgctcactcagcgtgtgctgaaagcgtacacagatgctcgcctgtctcaactgcctgactgactgtaggtttccagaagcgttaatgctggcttctgataaagcgggcact  
 gttaaagggggttttctcgttttgctcactgatgcccctgaaggggatttctgctcactggggttaagataccgaggaacgagagaggtgctacgatacgggttactgatg  
 atgaacatgccgggttactggaacgttgtgaggttaaacactggcggtatggtgcccgggacacagaaaatcaactcagggctcaatgcccagcctcgtttatcagagtgtaggt  
 gttccacagggtagccagcagcatcctgcatgocagatccggaacataaattggtgcaagggcgtgactcccgggttccagactttacgaacacggaaacccgaagaccatcctggtgt  
 gctcaggtcgcagagcgttttgcaacagcagctgcttaoactgtcctgctgctatcgggatcacttctgtaaacagtaaggaaccccggcgaactagccgggctcccaagacagga  
 gatatttatcccagccagcagcgacgcagcgcgcgagacagaacttaagggcggcctaacagcggctttgctggtgaccacatgacacagagctcaccagcccactgctgacg  
 tctctatggagaaaaataactgtagaggtgctggtcagagacatacaaaaataaaccccgaacattagtgcagcagcttccacagcaatggacatcctggtatccagcggata  
 gttaatgatcagcccactgacggctgcccaggaagattgtgaccggcctttacaggcttgcagcccgtctcgttcaacatcagaccaccacggcggaccacaggttagatcgggc  
 gagattdaactgcgcgcaaatttgcaagcgccgctgcaagggcgaactggaggggcaagcccaatcagcaacgactgtttcccggcaggttggcgcacgggtgggaaatgtaa  
 ttcagctccggcaatcggccttccacttttccccgcttttcgcaaaaagcgtggcggctggtttccacccggggaaaacggtctgatagagacacggcctaactctggcaactgta  
 taacgttaactggtttcaacattcaaccacctgaattgactctcctccggcgtatcaatgcoataccggcaaggggttttggcccactcgtggtgtccggcactctccctta  
 tgcgactctgcataggaaagcagcccagtagtaggttagagccgcttagaccgcccggcaaggaatggtgcaagagagatggcgcaccaacgctccccggccacggggcctgc  
 caccaataccacgcccgaacagcctgatgaccocgaagttggcgacccactctccccactcggtgatgtcggcgataaggcgccagcaaccgacactgtggcgccggtgatgcgg  
 ccacgatcgctccggtagagagtagatcgatctgatcctccgcaaa





# Supplementary Vector Sequences

## AID\*-INS- pET41

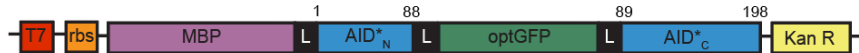

```
taatacgaactcaactataggggaattgtgagcggatacaaaattcccctctagaataaattttgtttaactttaagaaggagatatacatAtgaaaatcgaagAAGGTAACTGGTAACTC
ggatttaacgycgataaagcgtataacggtctcgtgaagtcggttaagaaattcgagaaagataaccggaattaaagtoaccggttgagcatcgggataaacggaagagaaattcccaacg
gttcgycgcaactggcgatggccctgacattatctctgggcacacgaccgctttgggtgctacgctcaatctggcctgttggtgaaatcaccgagcaaaagcgttccagacaaagct
gtatccggttaaccgggatgccgtacgtatacaacggcaagctgattgcttaccogatoctgttgaagcgttatcgtgattataaacaagatctgctgccgaaccgcaaaaacct
gggaagagatcccggcgtggataaagaactgaaagcgaagagtgaagcgcgctgatgttcaacctgcaagaacgctactcaccctggccgctgatgctgctgacggygggttatgcy
ttcaagatgaaaacggcaagtagacatataagacgtggcgtggaataccgtggcggaagcgggctgacctcctgggtgacctgataaaacaaacacatgaatcgacgacac
cgattactccatcgcagaagctgctttaataaagcgaacacgcgatgaccatcaacggccgtgggcatggtccaacatcgacaccgcaaaagtgaattatgggttaacggtactgc
cgacctcaaggytcaacctccaacccgttcgttggcgtgctgagcgcaggtattaacgccgcagctccaagaacaagagctggcaaaagagtctctgaaaaactatctgctgactgat
gaaggttgaagcgttaataaagacaaccgctgggtgacctgagctgaagctctacgaggaagagtggcgaaaagatccacctatggccgcaactatggaaaaacggcaaaaag
tgaaaatcatcccgaactcccgcagatgtccgctttctggtatgcccgtgcgctactcgggtgatcaaccgcccgaagcggctcgtcagactgctgatgaagcctgaaagcgcgcaagata
atcgagctcgaacaacaacaatacaataaacaacactcgggatcaggggaaggtttcagaattcgaaaaacctgtatttcaggggtcagcaATGGTAGCTGCTGATGAAC
CTGCTGTAATTTCTGTATCAGTTTAAAACCTGGCGTTGGGCGAAAAGCCGCTGTAACACTATCTGTGCTATGTGGTGAACCGTGTGATGGACAGCAGCGAAAGCCGTGAGTTTGG
CTATCTGCTGAACAAAACCGCTGCCATGTGGAACCTGCTGTTTCTGGCTATATATTAGCGATTGGGATCTGGATCTGGGCGCCGTGCTATCTGTGACCTGGTTTATCAGCTGGAGCCGCT
GCTATGGATCCGCTGGCTGCCCTGTCTGCTCCGCAATTCATGACCAAGGAGAAGAACTTTTCCAAAGTGTCCAAATTCATGTTGAATTAGATGGTGATGTTAATGGCACAAA
TTTTCTGTFCAGAGGAGGGTGAAGGTGATGCTACAACTCGAAAACCTGACCTTTTAAATTTATTTGCACTATCGGAAAACACTCTCTCCATGGCCCAACACTTGTCACTACTCTGACGCTA
TGGTGTTAACTCTTTCCCGTTTCCGGAATTCGGAATTCACATGAAAAGCCATGACCTTTTAAAGAGTGCCCATGCCGAAGGTTATGTACAGGAACCGCACTATATCTTTCAAAGATGACGGGAAT
ACAAGACCGCTGCTGTAGTCAAGTTTGAAGGTGATACCCTTGTTAATCGTATCGAGTTAAAGGGTACTGATTTTAAAGAGATGGAACACTTCTCGGACACAACACTCGAGTACAACCTT
AACTCACAAATGTATACATCAGCCGACAGACAACAAGAAGAAATGGAATCAAAGCTACTTCCAGACTTCCGACAAACGTTGAAAGATGGTTCGGTTCACACTAGCAGACCAATTTAACAACAAA
TACTCCAAATGGCGATGGCCCTGCTCTGCTTTTACCAGACAACCTTACCTGTCAACAGAAAGGTTCCCTTTCGAAAGATCCCAACGAAAGGGTACCCATGGCCCACTTGTCAATGAGT
CTGTAATGCTGCTGGGATTCAGGTGGAGGAGGTCTGGAGGGCGGTGAAGTGGTGGCGGAGGTAGCGATTGCCGCGCTCATGTGGCGGATTTTCTGGTGGCAACCCCAAGCTGAGC
CTGCGTATTTTACCCTGCTGTGATTTTTCGGAAGCgGcaGgCtGAACCGGAAGGCTTCCGCTGCTGTGCGGAAGCCGGGCTGCAGATTCGAGATTTATGACATAAAGATTTATGA
ATATGTGGAACACCTTTTGTGGAACCACTGgAGTACCTTTTAAAGCTGGGAAGGCCTGCATGAAAACAGCGTGGCTGTGAGCCGTGAGCTGCTGATTTCTGCTGCCGCTGTATG
AAGTGGATGATCTGCTGATGCGTTTCTGACCTTGGGCTGTGAGcttagcgtcttaaacaagccgcaaaagaaagcgtgagttggctgctgccaccgctgagcaataaactagcaataacc
cttggggccttcaaacggttcttgagggttttttggctgaaaagggaaactatcaccgattggcgaatggcagcgcgcctgtagcggcctatgaagcggcgttggggtggttcaag
cgcagcgtgaccgctacacttgcaccgctcctagcgcgcctctcttgcgcttttctccctcctctctcgcaccgcttccggcgttcccccgtcaagctcctaaatcgggggctcctctt
agggtccgatttagtgccttaacgacactcgcacccaaaaacctgatagggtgagtgttaccgttaggttaccgttagggccatcgccctgatagacggttttccgctttagctgtggatcca
cgtcttttaataagtgacctctgttccaaactggaacaacactcaacctatcctggtctattctttgattataagggattttggcgattttcggcattttggttaaaaaaagagcgtg
attttaacaacaaattaaagcgaatttttaacaacaaatataagcgtttacaatttcaagtgacccttttcgggggaatgtggcggaaccctatttggttatttttcaaatatcatcaaa
tatgattccgcttcaatgaattaaattcttaaaactcaatcgagcaataaactgcaatttatcaatgccatattttgaaaacacccgcttctgttaagta
gggaaaaactcaccgagcagttccatagatggcaagatctcgtgtatcgtgtcggatccgactcgtcccaactcaatcaaacactataaattcccccgtcaaaaaaagggttatac
aagtggaaaactcaccatgagtgacacgtgaatccggtggagatggcaaaagtttatgcaattttcagactttgtaaacaggaactcaaacaggaactcgaatgcaaccggcgcaaggaaactgcaagcgca
caaccaaacccgcttattcattcgtgattggcctgagcgagacgcaaaactacgcatcgtctgtttaaaggacaactcaaaaacaggaactcgaatgcaaccggcgcaaggaaactgcaagcgca
tcaacaataatttccactgacatcaggatattcttcaataacctggaatgctgttttccggggatccgagcgtggtgagtaaacctgcatcaatcaggagtaacaaaactgcttgaggtt
cggaaagcgtaaaaatcggtaaccgatttagtctgacctctcaatcagcttaacctatcggcactccttgccatgtttcagaaacaaactcggcgtaccgcatcggcgtctcccataca
atcgatagattttgcgaccctgattcccgcacatattcggcgagcccttatacccaataataactgagcaactttggaaatttaacgcgccctagagcaagacgctttcccgctgaata
tggctcatcaacccccctgtattactggtttagtaagcagacttttattgttcatgacaaacaaactccttaactggtttcgttccactcagcgtgacgttttccgttccactcagcagcgtgaaagatca
aaggatctcttgagatcctttttctgcgctaaactcgtgcttgcacaacaaaaaacaccgctaccagcgggtgggtttgttggcggatcaagagctaccaactcttttccgaag
gtaactggctcagcagagcgagataccaaactactgctcctctagtgtagcgcgtagttaggccaaactcaagaactctgtagcaccgctacatacctcgtctgcttaactcctggt
accagtggctgctgcccagctgagcagcttagtgcttaccgggttggactcaagcagatagttaccggataaagcgcaagcggctgagccgtgcaacggggggttctgtcacaacagccagct
tggagcgaacgactacaccgaactgagatcactacagcgtgagctatgagaagcgccacgcttcccgaaagagaaagcggcagacaggtatccggtaagcggcagggctcggaacagga
gagcgaacgagggagctccagggggaaacgcctggatcttatagtctcgtggttccgcaactcgtgacttggagcgtcgattttggtagctcgtcaggggggagggactatg
gaaaaacgcaacgcggccttttaccggtcctggccttttctggcctttctgctcaccatttctccgcttaacccccgtattctgtggataaccgtaataccgctttgagt
gagctgatcacgctcgcgcagcgaacgaccgagcgagcagctcagtgagcgaggaagcgggaagcgcctgatggcgtattttctcctacgcatctgtgggttatacaaccgc
atataagtgcaactctcagtaacatctgctctgctgagcgcagatagtaagcagatatacactcgcctatcgcctacgctgactgggtcaggtgctgctgcccgaaccccgcaacaccgctg
acgcgctcagcggcttctgctcggcgcctccgctcagacacaagctgtgacccgtcgcggagctcagctgtgctagaggttttccacctcaccgaaacgcgcgagcagcgtc
cggtaagctcctcagcgtgctcgaagcagctcaacagatgtctcctgctcaaccgctcgttggatttccagaacgcttaagcttccgcaagcgttaagctgctcgtatgataaagcgggctg
gttaagggcgggtttttccctgtttggctcaactgagctcgtctgctcgtgtaagggggtttctgttctatgggggtaatgataccgatgaaacgagagaggtgctcacgatacgggttactgatg
atgaactgcggcgttactggaacgcttggagggtaaaacaactggcgttatggatcggcgaggacagagaaaaactcactcagggctcaatgccagcgtcgttgaatcacagatgtaggt
gttccaagggtagccagcagcactcctgcgatcgatcgcagatccggaacataaagtgagcggcgcctgactcgcggtttccagactttacgaacacggaacccaagcaagcattcaatgttgt
gtctcagctcgcagacgcttttgcgacgacgctcctcaactcgtcgcgctatcgggtattcttgcataaccagtaaggaaccccgcagcctagcgggtctcacaacagacagga
caacgatctgctagtctcaccgcgcccaacggaaagcgtgactgggtgaaagctcacaagggcctcggtagagatccgggctcaatgagtgagctaaacttaactaaattggc
ttggcctcactgccccttccagtcgggaaacctgctgccaactgaatgaagctcggcaaacgcccgggagagggcgggttgcgtatggcgccaggggtgttttcttttca
ccagtgagcgggcaaacagctgattgccctcaaccgctggcctgagagagtgcagcaagcggctccacgctgggttgcgccagcagcgcaaaaactcgtttagatgggttaaccgc
gggatataacatgagcgtgctcggatcgtctgatcccaactaccgagatgtccgcaccaacgcgcaagccggactcggtaatggcgcgcaatggccccaagcgcacatctgatcgttggc
aacagcatcgcagtggaagcagctgccctcactcagcatttgcattgttgtaagaaaccggacatgagcactccagctcctcctcctcgtcgtgctgaattttgagtgagtgata
gatattttagcagcgaacgagcagcgcgcgagacagaacttaagtgggcaactcaacagcgcgatttgcggtggaacaaatgcgacagatgctcaccgcccactgcgctaacg
tcttcatgggaaaaataactgttagtgggtgctgttgcagacatcaagaaataacgcccgaacattagtgagggcagcttccacagcaatggcactcctggtcactccagcggata
gttaatgatcagcccactgacgcgttcgagcagaagattgtgcaccgcccgtttacaggtctcagacgcccctcgttcaacatcagacaccaccagcgtggcaccagttgtagcggc
gagatttaacgcccgcgcaaaatttgcagcggcgcgtgcaagggcagactggaggtggcaacgccaactcagcaacgactgttgcggcgaagtgttgcggcaggttgggaaatgtaa
ttcagctccgcccactcgcgcttccacttttccgcttcttcgcagaacgctgctggcctggttccaccagcgggaaaacgctctgatgaagacacccgctcgtcagcagcactcgcgacatgta
aaocgtaactggtttcaactcaaccacctgaaattgactcctcctccggcctctatcgtcactcaccgcaaaaggttttgcgcatctgatggtgctccggatctcagcgtctcctcta
tgccactcctgattaggaagcagcccagtagtggttggggccttgagcaccgcccgcgaagaaagggtgcatgcaagagatggcgcccaacagctcccggccacggggcctgc
caccatcccacggcgaacaaagcctcatgaccgcgaagtggcgagccgacttcccactcggtagtgccggatataaggccagcaaccgcaactgtggcggcgttgcggc
ccagatcgcctcggcgtagagactcagatcgtatcgtatcccgcgaa
```



# Supplementary Vector Sequences

## AID\*-SPL2 pET41

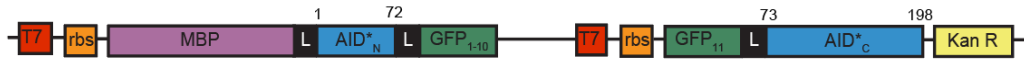

**taatacgcactcaactataggg**gaattgtgagcggatacaaatcccctctagaataatttggtttaactttaagaaggagatatacaatAtgaaatcgaagAAGGTAACTGGTAACTC  
ggattaacggcgataaaggctataacggctctgctgaagtcggtaagaatctcgagaaagataaccggaattaaagtaaccgttgagcatccggataaaactggaagagaatccccag  
gttgccggcaactggcgatggccctgacattatctctgggacacgaccgctttgtggtcagcctcaatctggcctgttggtgaaatccccggacaagcgtccagagacaagct  
gtatccggttaaccgggatgccgtacgttacaacggcaagctgatgctaccggatcgctgttggaagcgttatcgctgattataaacaagatcgtgcccgaaccgcaaaactc  
gggaagagatccccggcgtggataaagaactgaaagcgaaaggtaaagcgcgctgatgtcaacactgcaagaaccgactccactggccgctgatgtgctgacgggggttatgct  
tcaagtataaaaacggcaagtacgacataaagaogtggcgtggataacgctggcggaaagcgggtgacctcctggttgacctgatataaaaacaaacacatgaatcgagacac  
cgattactccatcgagaaogtgccttttaataaagcgcaaacagcgtgacctcaacggccctgggcatggtccaacatcgacaccgcaaaagtaattatgggttaaccgtactgc  
cgacctcaaggggtcaacatcaaacccgttcgttggcgtgctgagcgcaggtatcaacggcgcagtcgcaacaagagctggcaaaagagtccctgaaaactatcctgctgactgat  
gaaggtctggaagcgggttaataaagacaacaccgctgggtgcccgtagcgtggaagtctacgaggaagagtggcgaaagatccacgtatggcccaactatggaacacgcccagaag  
tgaatcactccgcaacatccccgcatgtccgctttctggtatcccgtgcgactcgggtgatcaacggcccagcggctcgtcagactgctgatgaagcctgaaagacgcccagacta  
attcgagctcgaaacaacaacaataaacaataacaacaacctcggatcgaggggaaggttcagaattcgaataacccggttcaaggggtcgacaATGGATAGCTGCTGATGAAC  
CTGCTGTAATTTCTGTATCAGTTTTAAAGAACGTGGCTGGGCGAAAGGCCGTCGTAAGAACCTATCTGCTGTATGTGTAAGAACCTGCTGTATGAGCGGACAGCGAAAGCTGATTTTGG  
CTATCTGCTAACAACAACCGCTGCCATGTGGAACCTGCTGTTTCTGCGTATATATAGCGATTGGGATCTGGATCCGCGGATCCGCTGGCTCCGCTGCTGTTCTGGCAATTCATAGAGCA  
AAGGAGAAGACTTTTCACCTGGAGTGTGCCAATTTTGAATTAGATGGGTGATGTTAAAGGGCAACAATTTCTGTCAGAGGAGAGGGTGAAGGTGATGCTACAACTCGGAAACCTC  
ACCTTAATATTTATTTGCACTGGAAACTACTGTTCCATGGCCACCACTTGTCACTACTCTGACCTATGGTGTCAATGCTTTTCCCGTTATCCGGATCAGTGAAGAGCATGA  
CTTTTCAAGAGTGCCATCCCGAAGGTTATGTACAGGAACGCATATATCTTTCAAGATGACGGGAAATACAAGACCGCTGCTGTAGTCAAGTTGAAGTGTATACCCCTGTTAATC  
GTATCGATTAAGGGTACTGATTTTAAAGAAAGATGGAACATTTCTCGACACAATGTATACATACCGGACAGACAGCAAAAGAAATGAATC  
AAAGCTAATTCACAGTCTGCCACACAGTGAAGATGGTTCGTTCAACTAGCAGACCAATATCAACAATACTCCAATTTGGCGATGGCCCTGCTCTTACCAGACACAACCTTACTT  
GTTCAACACAACCTGCTCTTCGAAAGCTGACCTAGCCTtagtcggcgcgcgcaaaat**taatacgcactcaactataggg**gaattgtgagcggatacaaatcccctctagaataatttggtttaactttaagaaggagatatacaatAtgaaatcgaagAAGGTAACTGGTAACTC  
atattagttaagtataagaagagatatacctATGCTGACCACTGGTCTCTGTAAGTCTGTAGTCTGCTGGGATTACAGGTGGAGGAGGTCTCGGATCGGCTGGTGGAGGTGGTGGT  
GGAGTACGGCCGCTGCTATCGTGTGACCTGGTTTatCAGCTGGAGCCCGTGTATGATTCCGCGGCTCATGTCGGCGGATTTTCTGCTGCGCAACCTCGAACTGACGCTCGCTATTTT  
TACCCTGCTGCTGTTATTTTGGCAAGCcGycaGgCGTGAACCGGAAGCCCTGCGTCTGCGGAAGCGGCGTCAGATTGCGGATTATGAAAGTTATGAATATTTGCTGGA  
ACACCTTTTGGAAAACCATGACGTACTTAAAGCGTGGGAAGCCCTGCATGAAAACAGCGTCGCTGAGCCCTCAGCTGCCTGCTATTTCTGCTGCCCTGTATGAAGTGGATGAT  
CTGCGTGTAGTCTGCTCTTCCGCTGCGCTGAC**cttagg**ctgctaaacaaagcccgaaggaagctgaatttgctgctgcccaccgtgagcaaaccttggccctc  
taaacgggtcttaggggtttttgctgaaagaggaactatccggatggcgaatggagcgcgccttgtagcggcgcctaaagcggcggggtgctggtggttacgcccgcgctgac  
cgctaacactgcccgccttagcgcgcctctctctgctttctccctctctctgcccactctgcccgttccccctgtaagctctaaactcgggggtccctttagggttcgact  
ttagtctttacggcaactcgaccocaaaacttgattagggtgatggttcaactgtagggccatccgctgatagacggtttttccgctttgacggttccgctttatgaaatctgctttat  
agtggactcttgcacaaactggaacaaactcaacactatctcgtgctctcttttgattataagggattttgccgatttggcctattggttaaaaaatgagctgatttaacaaaa  
attttaacggcaatttttaacaaatataacggttaacaatttcaaggtgcaacttttcgggaaatgcccgaacccatattggtttattttctaatacattcaaatgatatccgc  
tcatgaatataatttgaaaaactcactcgagatcaaatgaaactgcaatttattcattatcaggtattcacaaccatttttgaaaaagccgtttctgtaagggaaactc  
accgagcgactcacttaggtggaagactcctgctcgactccgactccgactcaactcaaatcaaacactataattccccctgtaaaaataaggttatacaagtgagaact  
caccatgaatgagcagactccgtgagaatggcaaaacttgaactttctccagactgttcaaacagccagccactaacgctcctcaaaaacaccccaaccg  
tattactctgctgattgcccctgagccagacgaataacgcatctgcttgaagaggaatatacaaacaggaactgaaatgcaaccggcgcaggaactgcccagcgaatcaacaactatt  
ttaccctgaaacaggaattcttcaactcctggaatgctggtttcccgggactcaggttgaatgaaactgaaatccaggaatggaatggaaggggca  
taaatctccgtcagccagtttagctgaccatctcatctgtaacatcttggaacgctacccttggcagtttcaagaacaactctggcgcctcgggctccccatcaactcgatgatt  
gtcgcaccgattggccgcaatttataccatataaactcagctggtggaatttaactcgggactagagcaagcacttccccgtgaaatggctcaatgaaac  
acccttgattactggtttagtaagcagacagttttatggttcatacaaaaaccccttaactgtaggtttctgctccactgagcgtcagacccttagaaaagatcaaaagattctt  
tgagatcctttttctgcccgttaactgctgctgcaacaacaaacacacccgctaccagcgggtttgttctgcccgtcaagagctaccacactccttttccgaaggttaactggcct  
cagcagagcgcagatacaaaactgctcctcttagctgtagccgtagttaggcacaactcaagaagctctgtagcaccgctacatacctcgtctgtaactcctggttaccagctgct  
ctgccagtgccgataagctgcttaccgggttgactcaagacagatagtaccggataagggcgcagcggctgagccgtgaacgggggttctgtagcacagcccagctggagcgaacg  
acctaacccgaactgagatacctacagctgagctatgagaagcgcacgcttccggaaaggaagggcagcaggtatccggtaagcggcagggtcggaaccagagagcgcacgag  
ggagcttccaggggaaacgcctggatctttagctgctgggtttccgcaactcgaactgagcgtcgattttgtagctcgtcagggggcgagcctatggaacacgcccga  
gcaacggcccttttaccggttctggccttttgcggccttttgcacacatgtcttctcctgcttaccctgatctggtgataaacctataccgctttgagtgagctgatacc  
gctcggcgcagccgaacacccgagcgaagcagctcagtgagcagaggaagcggaaagccgctgatgaggtattttctcctacgcatctgctgctgatttcaacaccgataatggtgc  
actctcagtaacactgctctgtagccgcatagttaagccagatatacactcctcctatcgtcactgactgaggtcattggctgcccgcacaccgccaacaccgctgacggccctga  
cgggctgtgctgctccggcactccgcttacagacaagctgtgacctcctccggagctgcatgtgtaagaggttttcaacgctatcaccgaaaccgagcagctcgggtaagctc  
atcagcgtggtcgtgaaagcttcaacagatgctgctgctcctcctcagcgtcagctgtaggttttccagaaagcgttaattgctggtcttgataaaaagcgggcaatgttaagggcgg  
tttttctcgttggtaactgatcctcgtgtaagggggtttctgtctcatggggtaagatgataaccgataaacgagagaggtgctcagcatagcgggttactgatgatgaactgcc  
cggttactggaacggtgtaggggttaaacactggcgtgtagatgagcgggaccagagaaaaactcactcaggggtcaatgccagcgtctcgttaatacagatgtaggtttccacaggg  
tagccagcagcactcctgcgatcgagtggaacataaagggtcagggcctgacttccgctttccagactttacgaaacacggaaaccgaaagacatctatgctgctcagctgct  
cagacttttgagcagcagctcctcactcctgctgctgctgctgcttctgtaaacactcaagcaacccgcaagcctgagcgggtcctcaacgagcagcagctatgct  
ctagtcatgcccgcgcccaccggaagagctgactgggtgaaagctcctcaagggcctcggctcgagatagccgggtccctaatgagtgagctaaacttacattaatgcttggctcact  
gcccgtttccagctcgggaaacactgctgctgacagctgcaatgaatcaagcgaacgcgggggagagcgggtttgctgattggggccagaggtggttttcttccaccagtgagacg  
ggcaacagctgattgcccctcaccgctgcccctgagagagtgcagcaagcggctccagctggtttgcccaagcagggcaaaactcctgttgatggtggttaacggcggtataaaca  
tgagctgctctcggatctgctgatacctaccagagatgctccgaccacgcgagccggcagctcgtgtaagggcgcattgcccagcggccatctgatgctggcaaccagcagctga  
cagtggaacgatgcccctcactcagatggtttgttgaacccggacatggactccagctgctcctccgctatccgctatccgctgattgctgagtgagatgagattatg  
cagccagccagcagcagcgcgcgagacagaacttaattggcccgtcaaacgcgctggttctgctggtgaccacatgcgaccagatgctccacgcccagctcggcgtaccgctctcagggga  
gaaaataaactggtgatgggtgctggtcagagacatacaagaataaacccggaacattagtgacagcagcttccacagcaatggcaatcctggtcattccagcggatagtttaagatca  
gcccactgagcgttgccgagaaagatttgaccggcggctttacagcttccagccgctctctcaactcagacaccaccagctggccaccagttgatcggcgagagatttaact  
gccgcaacatttgcagcggcgtgagggcagactggaggtggcaacgcaactcagcaacgactgtttgccgcaagttgttggcaacggctgggggagttgaaatcagcctcgc  
cattcggcgtcttcaacttttcccggcttttcgcaaaaactgctggttccaccgcggaaccgctgataagagacaccggcaactctgcacatctgataaacgctgataaacgctg  
gtttacacattcaccaccctgaattgactctcttcccggcgtcactatgccataaccgcaaggttttgcgcaatcaggttgcgggatctcagcctctcccttatgagcactcctg  
cattaggaagcagcccagtagtaggttgagggcgttggaccgcgcgcacaggaatggtgcgactgcaagagagatggcgcccaacagctccccggccaggggctgccaccataacca  
cgccgaaacaagcgtcactgagcccgaatggcgagcccgatctcccactcggtagctgcccgatataggcgcaagcaaccgacactggtgcccggctgatgcccgcagcagctgctg

# Supplementary Vector Sequences

## AID\*-SPL2<sub>N</sub> pET41

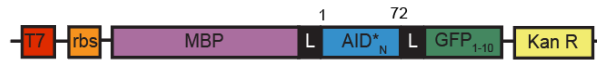

```
taatacgaactcaactataggggaatttggagcggataacaatcccoctctagaataaatttggtttaaccttaagaaggagatatacatAtgaaatcgaagAGGTAACCTGGTAACTC
ggattaacggcgataaaggctataaccgctctcgtgaagtcggtaagaaatcggagaaagataccggaatataagtcaccgttgagcatccggataaacggagagaatccccacag
gttcggcgcaactggcgtggcctgacattatctctgggacacgaccgcttgggtggtcactgcaactcggcctgttggtgaaatcaccocgggacaaagcgttccaggcaacgct
gtatccgttaccctggggtgcccgtacttacaacgccaagcgtgatgcttaccogctgctggtgaagcgttatcgtgattatacaaaagatcgtgcccgaaccggccaaaaccc
gggaagagatccggcgctggataaagaactgaaagcgaaggtgaagcgcgctgatgttcaacctgcaagaaccgacttcaactggccgctgatgctgctgacgggggttatgog
tcaagatgaaacggcaagtcagacattaaagcgtggcgtggataacgctggcgcgaaagcgggtgacocctcctgggtgacatgataaaacaacacatgaatgagacac
cgattactcactcagagaagctgoccttaataaaggcgaacagcgtgaccatcaacggccgctggcgtatggccaacatcgacaccagcaaaagtaattatgggttaacggctacgc
cgacotcaagggtcaaccatcaaacctctgttggcgtgctgagcgcaggtatatacgcgcgcaactccgaacaagagctggcaaaaagatcctcgaaaactatcgtgactgat
gaaggtctggaagcgggttaataaagacaacccgtgggtggcgtgagcgtgaagtcctacaggaagaggttggcgaagatccagctattggcggcaactatgaaaacggccagaag
tgaatcatgcccgaacatccgcgagatgcccgttctgtgatgcccgtgctgactggcgtgatcaacggcggcagcggtcgtcagactgctgatgagccctgaaagacgcgcagacta
atcagcgtcgaacaacaacaataacaataacaacaacctgggatcgagggagagatttcagaattcgaaaaactgtatttccaggggtcgacaATGGTATAGCTGCTGATGAAC
CTGCTGTAATTTCTGTATCAGTTTAAAACCTGCGCTGGGCGAAAGCCGCTGCGTGAACCTATCTGTCTGTATGTGGTGAACCGTACGCGCAGCAGCAAGCACTGGATTTGG
CTATCTGCGTTAACAAAACCGCTGCCATGTGGAACCTGCTGTTTCGCGTATATATAGCCGATTGGGATCTGGATCCCGGGATCCGCTGGCTCCGCTGTGTTTCCGAACTTCATGAGCA
AAGGAGAAGAATTTTCACCTGGAGTTGTCCCAATTTCTGTGAATAGATGTTGATGTTAAATGGGCACAAATTTCTGTCTGAGAGGAGGGTGAAGGTGATGCTACAACTCGAAAACCT
ACCCTTAAATTTATTTGACTACTGAAAACTACCTGTTCCATGGCCAACACTGTGCACTACTCTGACCTATGGTGTTCATGCTTTTCCGGTATCCAGGATCAAAAAGGCATGA
CTTTTCAAGAGTCCCATGCCGAAGTTATGTACAGGAACGCACTATATCTTCAAGATGACGGGAAATCAAGACCGCTGCTGTAGTCAAGTTTGAAGGTGATACCTCTGTTAATC
GTATCGAGTTAAAGGTACTGCTTTTAAAGAAGATGGAACACTTCTCGGACCAAACTCGAGTACAACCTTAACTCACAAATGTATACATCACCGCAGACAAAACAAGAATGGAATC
AAAGCTAACTTCACAGTTCCGCACACAGTTGAAGATGGTTCGTTCAACTAGCAGACCAATATCAACAATAATCTCCAATTGGCGATGGCCCTGTTCACAGACAACACTTACC
TCAACACAACCTGCTCCTTTCCAAAAGATCCCAACGAAAAGGTAACCTagtcgaggtacgacgcatacagcttagcctgctgataaacaagaccgaaggaagcgtgaggtggcgtgccc
cgtgagcaataactagcataacccttggggcctctaaacgggtcttgaggggtttttgctgaaagcagcaactatataccggattggcgaatggcggatggcggcctgtaaaagggcatttgcagctttc
aagcggcggcgggttggtggtttacgcgcagcgtgacggcctcaacttggcagcgccttagcgcocctcctcctgctttctccctcctctctcgcacagcttccggcgtttcccgcgtc
aagctctaaactcgggggtccctttagggttccgatttagtgccttaccggcactcgcaccccaaaaaactttagttagggtgaggttccagtagtgggccatcgcctctgatagcaggt
tttgcocctttgacgttggagtcacagttccttttaatagtgactctgtttccaaactggaacaacactcaaccctatctcgtctattcttttataaagggtatttgcagctttt
ggcctattgggttaaaaaatgagctgatttaacaaaaattaaaccggaatttaacaaaaatataacgttacaattcaggtggcaacttttgggggaaatgtggcggaaccocctattt
gtttattttctaaattacattacaatatgatatccgctcatgaaatatttcttaaaaaactcgaactcaaatgaaactgcaattttatcactatagggatattcaccatattt
ttgaaaaggcgtttctgttaaggggaaaactcaccggagcagttccataggtgcaagactccggatcgtgctcggctgagattccgactgtccaaacatcaatacaacctataatt
tcccctcgtcaaaaatagggttcaagtgagaatacaccatgagtgacgactgaaactcggtagaagtgccaaaagggtttatgcattctttccagacttgttcaacaggccagccattt
cgtctcactcaaaaactcactcgcatacaacaaccctttatcactcgttggatgagcgcagcagcaaaaacggcgtgataaaagggataatacaaacgagcaattccaatgcaca
ccggcgaaggaactgccagcgcatacaacaatattttcaacctgaactcaggtattcttaaaactcgaatgctgttttccgggggagcaggtggtgagtaaccatgcactcatcag
gagtaagctaaaactgctgagtggtcggaaggcaataattccgtcagcagcttaagtcgtgacatcgtgacatctgtaaaactatggcaacgctacoccttgcgatgttcagaaaacac
ctcggcgcctcgggcttcccatcaaatcgtatgattgcccgcacttatcggcagcaatatacggcagcccaatttataccatataaatcagcactccatgttggaaatttaacggcgcct
agagcaagactttccogtggataggtcaaacaccocctgtatctactgtttatgtagcagacagcttttattgttcatgacaaaaactcccttaacgtgagtttttcttccactga
gctcagaccocctgataaaagatacaaggatctctttgagatccttttttctgcccgaactcgtgcttgcacacaaaaaacccacccctaccagcgggtggtttgttccggatca
agactaccactccttttccgaagggttaactggcttccagcagagcgcagataccaaaactactcctctctatgtagccgtatttagggccaccactcagaactccttagcaccgccta
catacctcctctgctaatcctgttaccagtggtcgtcgcagtgggcgtgctgcccagtgagctaaagtcgtctaccgggttgactcaagacgatagttaccggataagggcgcagcgtcgggtgaacg
gggggtctcgtgcacacagcccagcttgagcgaacacacactacacccgaactgagatacctacagcgtgagctatgagaagcggccacgctcggcgaagggagaaaagggagcaggtatcc
ggtaagcggcagggcggaaacaggagagcgcagggagctccagggggaaacgcctggtatctttatagtcctgctgggtttcggcaccctgactgagcgtcgtatttttggat
gctcgtcagggggggcgggactatggaaaacggcagcaacggccttttacggtttccctggccttttgcacacatgttcttttctataagggatattcccctgatctctgtg
gataacgctattaccgoccttgagtgagctgataccgctcggccagccgaacgacgcagcgcagcagctcagtgagcgaggaagcgggaagcgcctgatcgggtatttctccttac
gcactgtggcgtatttcaacaccgataataggtgcaactcagtaacactcgtctgatgccatagttaaagccagatatacactcggctatcgctacgtgactgggtcagctggctgoc
ccccgacaccggcaaacaccgctgacgcccctgacggccttctctgctcggccatccgctacagacaagcgtgacgctcggggagctgcatgctcagaggttttccaccgtc
ataccgaaacggcggagcagcgtcgggtaagctcatcagctgctggaagcgtatcaagatgctgctgctcctcgcgtcctcaagggcctcgtgagtttctcagaagcgttaatg
tctggtctctgataaaagcgggocctgtaagggcgggttttctcgttggtcactgatgctcctcgtgtaagggggattctgttcaagggggtaataatgataccgatgaaacgagagagg
atgctcacgatacgggttactgatgatgaacatgccggttactggaactgttgagggttaaaacactggcgttggatggcgggggaccagagaaaaactcaactcaggggtcaatgcca
cgctctgttaataacagatgtaggtgttccacagggtagccagagatcctcgcagatccggaacataatggcagggcgtgactcggcgtttccagacttaccgaaacac
ggaaacggagaccatctatgttctgctcagctcagcagacttttcagcagcagctgcttcaactcgcctcgcgtatcggtgatctcttgcataacagtaagggcaaccccggcag
cctagcgggtcctcaacgacaggaacagatcgtactgctgcccggcggcgggagggagcactgggttgaaggtcctcaagggcctcggctgagatcggcgtgctataatg
agtgagctaaacttacatataatggctgctcactgcccgtttccagtcgggaaacccctgctgcccagcttaataatgaaatcggccaacgcggggagggcgtttgcgtattg
ggcggcaggggtgggttttcttccaccagtgagcgggcaacagctgattgcoccttaocgcctggcctgagagagttgacgaagcgggtccacgctggtttgcccagcaggggaaa
atcctgtttgagtggtggttaacggcgggatataacatgagctgctctgggtatcgtgctatcccactaccgagatgtccgaccaaacgcgcagcccggactcggtaaggcgctattg
gcccagcggcactcgtatcgttgcaaccagcagcagtggaacgatccctcaactgcaatgtgctggtttgtaaaacgggacatggcaactccagtcgcttcccgttcccgt
atcggtgaaatttgatggcagtgagatattatgccagccagcagcagcgcggcagagcaactaaatggcccctaacagcgcgactttgctggtgaccacaatgcgcag
atgctccaacggcagcgcagctaccgctctcatgggagaaaataactgttggatgggtgctggcagagacatacaagaataaacggcggaaacattagtcagggcagcttccacagcaa
tggcactcgtgctcactccagcggtatgattatgatcagcccactgacgcgttggcggagaaagattgacacgcgcctttacagctctcagcgcgcctctgctctaccatcgacaccacc
acgctggcaccaggttgatcggcggcagatttaacggcggcaactttgacgcggcggcgtgcaagggcgaactggaggtggcaacggcaatagcaacgactgtttggccgcagttg
ttgtgccacggcgttgggaaatgtaattcagctcggcctcggcctcttcccggcttttcgcagaaacgctggctggcctggttcaaccagcgggaaaacggctgtgataagga
cctggcactcctgcacactcgtataacgcttaacgcttcaaccocctgaactcctcggcggcctatccatgccatccggcctatccagcggcaggtttggcctcctgaggtg
tccgggtctcagcctctcccttatgagctcctgcattaggaagcagcccagtagtaggtttagggcgttgagcaccggcggcgaaggaatggtgactgcaaggagatggcggcca
acagctccccggcggcggcctgccaccatacccaagcgaacaaagcgtcagtagcggcgaaggtggcgaccgctctcccatcgtgtagtggcgatagggcgcagcaaac
gaactgtggcggctgagcggcgcaagctgctcggcgtagaggtcagatccgatccgcccggaa
```

Supplementary Vector Sequences

AID\*-SPL2c pET41

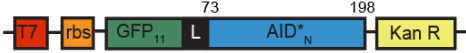

taatacgaactcaactataggggaattgtgagcggataaacaattcccctctagaataaattttgttaactttaagaaggagatatacatatgGGTACC<sup>73</sup>CGTACCACATGGTCC<sup>198</sup>TCATG  
AGTCTGTAAATGCTGCTGGGATTACAGGTGGAGGAGGTTCTGGAGCCGGTGGAAAGTGGTGGCGGAGGTAGCGGCCGTTGCTATCGTGTGACCTGGTTTATCAGCTGGAGCCCGTGTAT  
GATTGCGCGCTCATGTGGCGGATTTTCGCTGGCAACCCGAACCTGAGCCCTGCGTATTTTACCGCGGCTGTATTTTGGCGAAgCcgGcagGcGTGAACCGGAAGGCTGCGTCC  
TCTGGCGGAAGCGGGCGTGACAGATTGCGATTATGACCTATAAAGATTATGAATTGCTGGAAACACTTTGTGGAAAAACCATGgACGTACCTTTAAAGCGTGGGAAGGCTGCATGAAA  
ACAGCGTCTGAGCCGTCAGCTGCGCTGATTTCGTGGCCGTGATGAAGTGGATGATCTGCTGATGGCTTTCGTACCCTGGGCCGTTAGcctagggctgctaaacaaagcccg  
aaggaagctgagttggctgtccaccgctgagcaataaactagcataaacccctggggcctctaaacgggctctgaggggttttttgcgaaaggaggaactatacctggatggcgaa  
tgggacgcgcctgtagcggccat taagcggcggggtgtgggttacgcgcagcgtgaccgtacacttgccagcgcctagcggcctcctttcgtcttctcccttcttctc  
cgccacgttcgcccgtttcccgcgtcaagcctctaaatcgggggctcctttagggttcagatagtagtctaacgcaactgcaccaccccccaaaaacttgattaggtgtagggtcaactg  
gtggcactgcctgatagacggtttttcgcctttgacgttggagctcaacggatctttaaagttagctccttttaagttagctcgttccaaactggaacaacactcaacctatctcgtctattctt  
gattataagggatgtgcctgtccgctatgttgtaaaaaatgagctgatttacaacaaatggaacgcaatttcaacaaataatcaagcttaccaattcaagtgcaactttcgt  
ggaaaatgtgcggaaccctatttgttatccccctaaatcacatacaatgatacctgatcgcctcatgaatttaattctttagaaaactcatcgagcatcaaatgaaactgcaatttatcc  
atatacaggtatatcaatccccatttttgaaaaagccgtttctgtaatgaaaggagaaaactcaaccaggcagcttccatagatggcaagaatcctgggtacggtctgggatccgactcg  
tccaacatcaatacaaccatttaattccccctcgtcaaaaaataaggttatacaagtgagaatcaccaatgagtgagcactggaatccggtgagaatggcaaaaaggtttatgcattctttcc  
agactgttcaaacagcgccactacgctcgtcaatcaaaatcaactgcctcaacaaaacccgtttatcatttccggtatggcggctgagcgagacaaaacacggatcgtgttaaaagga  
caattacaacacaggaatcgaatgcaaccggcgaggaacactgccagcgcatacaacaaatatttccactgcaacaggatattcttcaatcactggaatgctgtttcccggggagcgc  
agtggtgagtcaaccatgcatcagcaggttaggtataaaatgctttaggtcggaagggcataaaatccgtaaccagcagtttagtctgacctctcactgtcaacatcattggcaacg  
tacctttgccatgttcagaaaacaactctggcgcactggggcttcccatacaaatcagatagattgtgcgacctgattgcccgcacatttaccgatataatcaagca  
tccattgtggaatttaatcgccgctagagcaagacgcttcccggttgaatatggctcaaacaccctgtattactgtttatgtaagcagacagtttattgttcaatgacaaaatcc  
cttaactgagcttttcgctcactgagcgtcaagccctgtagaaagatcaaaagatcttcttgagactctttttctgcgctaaatcgtgcttggtaaaacacacccccaccctc  
caagcggtgggtttgcttgcggatcaagagctcaaacctctttttccggaagtaactggctctcagcagagcgcagatcaaaactactgcctctcagtagtagcctgttaggccacca  
cttcaagaactctgtagcacccctacatacctcgtctgctaatcctgttaccagtggctgcccagtgagcgaatagctgcttaccgggttggactcaagcagatagttaccgg  
ataagcgcagcggctcggctgcaacgggggttcgtgcaacacagccagctggagcgaacagcctacacccaactgagataccacagcgtgagctagagaagcggcaccgtctcc  
gaaggggaaaagcggacaggtatccggttagcggcagggtcggaacagggagagcagcaggggagcttccaggggaaaacgctggatctttagtccgtcgggtttcgcacact  
ctgacttggagcgtgagtttttggatgctcgtcagggggcgggacgcttgaaaaaacgcaacacggcctttttcaggttctccgcttttgcctggccttttgctcacatgctct  
ttcctcgttaccctgatctgtggataaccgcttaccgcttttagttagctgatacggctcggccgcagcgcaacagccagcagcagcagctcagtgagcgaggagaagcggaag  
cgctgtgcggattttctccttaacgtctgtcgggtatttcaaccgcatataggtgcaactcctcagtaacatcgtcctgatgcccatagtagcagatataactccgctat  
cgtcactgactgggtcattggctgcgcccgcacaccccagcctgagcggcctgacgggctgtctgctcccggcatccgcttcaacagaactgtagcgtctccgggagc  
tgcatgtgcagaggtttaccgctcaccgaaacggcggagcagctgcggtaagctcatcagcgtggctgtagagcatcaccagatgctcgtcttcaaccgctccagctc  
gttagttttccagaaagcgttaattgctggcttctgataaaagcgccagcttaagggcgggtttttcctgcttgggtaactgctcggcgtgaaggggttctgtctatggggg  
taatgataaccgatgaaacgagagaggtgctcagcagatagcgggttactgtagtgaacatgcccgggttactggaacgcttggagggtaaaacacactggcggtatggatgcggcgggacag  
agaaaaatcactcagggcctcaatgccagcgtctcggttaatacagatgtaggtttccacagggtagcagcagcactcctgcatcagatccggaacataatggtcgagggcgcgtgactt  
ccgctttccagactttaagaaaaacggaaaccgaagaccattcatgtgtgtctcaggttcgagagctttagcagcagctgctcacttccgctcggctcagctatcggtgattcattct  
gctaaccagttaagcaaccgccagcctagcgggtcctcaacacagggacagcagcatcatgtagctatgcggcgccaccggaggagcgtgagctgggttgaaggtctcaagggc  
atcgctcagatccgggtgctaaatgagtagctaaactacattaatcggcttcgctcactgcggccttccagctcgggaaacctgctgaccagctcaatgaatcgggcaacg  
cgccgggagagcggtttgctattggggcccagggtggtttttcttccacagtgagacgggcaacagctgattgcccctcaccgctggcctgagagagttgcaagcagcggtcc  
acgtgtttgccaccagcgccgaataatcctgtttgaggggttaacggcgggatataacatgagctgctctcggtatcgtctatcccactaccgagatgctcggaccaacggcag  
ccggactcggtaattggcgccattgcgccccagccactcgtatcgttggcaaccagcactcagctgggaacagatgccctcactcagcatttgcattggtttgtgaaaccggcaatgg  
cactccagtcgcttcccgtccgctatcggtgattttgattgcgagtgagatattttagccagcagccagcagcagcagcggcagacagaacttaatgggcccgtacacggcg  
atgttctgttgaccacatgcgaccagatgctccacggcagctgcctaccgctctcattgaggaataaactggttaggggtgctggcagagacatcaagaaataacgcccgaac  
atgagtcagcagcttccacagcaatggcatcctggtaaccagcggatagtttaatgatagcaccactgacgcgcttgcgcgagaagattgtgcaaccggcctttacaggtctcagcgc  
cgctcgttctaccactcagcaccacacagctggcaaccagttgacggcgcagatttcaatcgccggcagaacttgcagcggcggctgagggggcagactggaggtgcaaccgcaatc  
agcaacgactgtttcccgccagttgtgtgccacggggtgggaatgtaattcagctcgcctacggcgttccacttttccggcttttgcgagaacgctggctggcctgggtcacc  
cacgcggaacggctgataagagacaccggcactcctgcagacatcgtataacggttactggtttcacattcaccacccctgaattgactctcctcggggcctatcatgcccacggc  
gaaaggttttgcccattcagatgtgtcgggatctcagcgtctcccttatgagactcgtcattaggaagcagcccagtagtggttgagggccttgcagaccggcggcgaaaggaa  
tggtgcatgcaaggatggcgcccaacagctccccggcaccggggcctgcccaccatacccacggcaaaacagcctcatgagcccgaagttggcagggccagctctccccatcggtga  
tgtcgcgcatataggcgccgaaccgcaactgtggcggcgtgatgccggcagcagctgctcggcgtagagagatcgagatcagatcagatcccgcgaaa













# Supplementary Vector Sequences

## A3A-SPL2c pLEXm

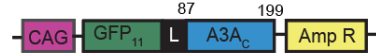

ACATTGATTATTGACTAGTTATTAATAGTAATCAATTACGGGGTCAATTAGTTCATAGCCATATATGGAGTTCGCGTTACATAACTTACGGTAAATGGCCCGCTGGCTGACCGCCCA  
ACGACCCCCCCATTGAGCGTCAATAATGACGTATGTTCCCATAGTAACGCCAATAGGACCTTCCATTGACGCTCAATGGGTGGACTATTACGGTAAACTGCCACTTGGCAGTACAT  
CAAGTGATACATGCGCAAGTACGGCCCTTTGTGCGGGGGAGCGGCTCAGGGGGTGCCTGCGTGTGTCGTCGTCGGGGAGCGCCGCTGCGCCCGCGCTGCCCGCGGCTGTGAGC  
ATTAGTCATCGCTATTACCATGGGTGAGGTGAGCCCCAGTTCTGCTTCACTCTCCCATCTCCCCCTCCCAACCCCAATTGTTATTTATTTTTTAAATTTTGTGTCGA  
GCGATGGGGGGCGGGGGGGGGGGCGCGCCAGCGGGGGGGGGGGGGAGGGGCAGGGGCAGGGCGGGGGGGGGGGAGGCGGAGAGGTTGCGGGCGCAGCAATCAGAGCGGGCGCTCGGAAAGT  
TTCTTTTATGCGGAGGGCGGGCGGGCGGGCTTATAAAAAGCGAAGCGCGGGGGGGGGGGAGTGCCTGCTGCTGCTTGCCTTGCCTTGCCTGCGCCGCTCGCGCCGCTCGCGCCGCGG  
CCCCGGCTGTGACTGACCGGTTACTCCACAGGTGAGCGGGCGGGACGGCCCTTCTCTCCGGCTGTAATTAGCGCTTGTGTTAATGACGGCTCGTTCCTTTCTGTGGCTGCGTGA  
AAGCCTTAAAGGCTCCGGAGGGCCCTTTGTGCGGGGGAGCGGCTCAGGGGGTGCCTGCGTGTGTCGTCGTCGGGGAGCGCCGCTGCGCCCGCGCTGCCCGCGGCTGTGAGC  
GCTGCGGGCGCGGGGGCTTTGTGCGCTFCGCGGTGTGCGGAGGGGAGCGGGCGGGGGGGTGCCTGCGCGGTGCGGGGGGGTGCAGGGGAACAAAGGTCGCTGCGGGGTG  
GTCCGTTGGGGTGTGAGCAGGGGGTGTGGGCGCGGGTTCGGCTGTAACCCCTGCACCCCTTCCCAGTGTGCTGAGCACGGCCCGCTTCGGGTGCGGGGGTCCGTCGGGG  
CGTGGCGGGGGCTCGCGTGCGGGGCGGGGGTGGCGGAGGTGGGGTGCGGGGGGGGGGCGCTTGCCTGCGGGGGAGGGTTCGGGGGAGGGCGCGGGCGGGCCGAGCGCC  
GGCGCTCGAGGCGCGGAGCCGACCCATTGCTTTTATGTAATCGTGCAGAGGGCGCAGGGACTTCTTTGTCCTCAATCTGGCGAGCCGAATCTGGGAGCGCCCGCCG  
ACCCCTTACGGGGGGGGGCGAAGCGGTGCGGCGCGGAGAAAGAAATGGCGGGGGGGGGCTTCTGCTGCTGCGCGCGCGCTCCCTTCCATCTCCAGGCTCGGGGTGC  
CGCAGGGGAGCGCTCCTTTCGGGGGGGAGGGGAGGGGGTTCGGCTTCTGCGTGTGACCGGGCTCTAGAGCTCTGTAACCATGTTTCATGCTTCTTCTTTCTACAG  
CTCCTGGGAACGTGCTGTTTGTGCTGTCATCATTTTGGCAAAGAAATGggcgctcagggcGAATTCgccaccatgGGTACCGGAGCAGATGGTCTCATGAGCTCTG  
AAATGCTGCTGGGATTACAGTGGAGGAGTTCGAGGGCGGTGAAAGTGGTGGCGGAGGTAGCGCCAGATCTACAGGGTCACTTGGTTCATCTCCTGGAGCCCTGCTTCTCTGGG  
GCTGTGCGGGGAGTGCCTGCGTTCCTCAGGAGAACACACAGTGCAGACTGCTGATCTTCTGCTGCGCCGATCTATGATTACGACCCCTATATAAGGAGGCACTGCAATGCTGCGG  
GATGCTGGGGCCCAAGTCTCCATCATGACCACGATGAATTTAAGCACTGCTGGGACACCTTTGTGACCCAGGGATGTCCCTTCCAGCCCTGGGATGGACTAGATGAGCACAGCCA  
AGCCCTGAGTGGAGGtagctcagagactagtatcgcgatAATCTACTCTCAGGTGCAGGCTGCCTATCAGAGGTGGTGGTGTGGCCAATGCCCTGGCTCACAAATFACCCTGA  
GATCTTTTCCCTGCCAAAATTTATGGGACATCATGAAGCCCTTGCATCTGACTTCTGGCTAAATAAGGAAATTTATTTTTCATGCAATAGTGTGTAATTTTGTGTCT  
CTCACTCGAAAGGACATATGGGAGGCAATCAATTTAAAACATCAGAATGAGTATTTGGTTTGTAGAGTGTGGCAACATATGCCATATGCTGGCTGCCATGAACAAAGGTGGCTATAAAGA  
GGTCACTAGTATATGAAACAGCCCTGCTGTCCATTCCTTATTCATAGAAAAGCCTTGCATGAGGTAGATTTTTTTTATATTTGTTTTGTGTTATTTTTTCTTAAACATCCCT  
AAAAATTTCTTACATGTTTTACTAGCCAGATTTTCCCTCCTCTCCTGACTACTCCAGTCATAGCTGTCCTTCTCTTATGAAAGTCCCTCGACCTGCAGCCCAAGCTGGCGTAA  
TCATGTTATAGCTGTTTCTGTGAAATTTTATCCGCTCACAAATCCACACAACATACGAGCGGAGCATAAAGTGTAAAGCTGGGGTGCCTAATGAGTGTAGTACTCACTAAT  
AATTCGTTGCTCACTGCGCTTTCCAGTGGGAAACCTTCTGCTGCGGAGGGATCGATCCGTCGATTAATGAAATCGGCCAACCGCGGGGAGGGCGTTTTCGCTATTTGGCGCT  
CTTCCGCTTCTCCTGCTCACTGACTCGTGCCTCGTGTGCTGCGCTGCGGCGAGGGTATCAGCTCACTCAAAGCGGTAATACGGTTATCCACAGAATCAGGGGATAACGAGGAAAG  
AACATGTGAGCAAAGGCGCAGCAAAGGCCAGGAACCGTAAAAAGGCCGCGTTCGTCGGCTTTTCCATAGGCTCCGCCCCCTGACGAGCATCACAAAAATCGACGCTCAAGTCAGAG  
GTGGCAAACCCGACAGGACTATAAAGATACCAGGCGTTTCCCTGGAAGCTCCCTCGTGGCTTCTCCTGTTCCGACCCCTGCGCTTACCAGGATACCTGTCGGCTTTCTCCTTCGG  
GAAGCGTGGCGTTTCTCAATGCTCAGCGTGTAGGTATCTCAGTTTCGGTGTAGGTCGTTTCGCTCAAGCTGGGCTGTGTCACGAAACCCCTTACGCCGACCCGCTGCCTTATCC  
GGTAACTATGCTTGTAGTCCAAACCCGTAAGACAGGACTTATGCCACTGGCAGAGCCACTGGTAACAGGATTAGCAGAGCGAGGTATGTAGGCGGTGCTACAGAGTCTTTGAAAGT  
GTGGCTAATACGGCTACACTAGAAGACAGTATTTGGTATCTGCGCTCTGCTGAAGCAGTTACCTTCGAAAAGAGTGGTAGCTCTTGATCCGCAAAACAAACCCGCTGGTA  
CGGTGGTTTTTTTTGTTTGAAGCAGCAGATTACGCGCAGAAAAAGGATCTCAAGAAGATCTTTGATCTTTTCTACGGGGTCTGACGCTCAGTGGAAACGAAACTCACGTTAAGGG  
ATTTGGTTCATGAGATTACAAAAAGGATCTTCACTAGATCTTTTAAATTTAAATGAAGTTTTAAATCAATCTAAAGTATATATGAGTAAACTTGGTCTGACAGTTACCAATGCTT  
AATCAGTGAGGCACTATCTCAGCGATCTCTATTTCGTTTCACTTCAATAGTTCCTGACTCCCGCTGCTGTAGATAACTACGATACGGGAGGGCTTACCATCTGGCCCGAGTGTGCAA  
TGATAACCGGAGACCCACGCTCACCGGCTCCAGATTTATCAGCAATAAACCAGCAGCGGGAAGGGGGAGGGGCGCAGAGTGGTTCCTGCACTTTTTCGCGCTTCCATCCAGTCTATTAAT  
TGTTCGGGGAAGCTAGAGTAAGTAGTTCGGCAGTTAATAGTTTGGCAACCGTTGTGCGCATGCTACAGGCATCGTGGTGTACAGCTCGTCTGTGTTGGTATGGCTTCACTCAGCTCCGG  
TTCCCAACGATCAAGGCGAGTTACATGATCCCCATGTTGTGCAAAAAAGCGGTAGCTCCTTGGTCTCCGATCGTTGTGAGAAAGTGGCCGAGTGTATCACTCATGGTTA  
TGGCAGCACTGCATAATTTCTTACTGTTCATGCCATCCGTAAGATGCTTTTCTGTGACTGGTGTGACTCAACCAAGTCACTTGTGAGAAAGTGTATGCGGGCAGGAGTGTCTTGCCTTC  
CCGGCTCAATACGGGATAAATCCGCGCCACATAGCAGAACTTTAAAAGTGTCTCATTTGGAAAACGTTCTTCCGGGGGCAAAACTCAAGGATCTTACCCTGTTGAGATCCAGTTC  
GATGTAAACCACFCGGACCCCACTGATCTTCAGCATCTTTTACTTTTACCGAGCGTTTCTGGGTGAGCAAAAAACAGGAGGCCAAAAATGCCCAAAAAAGGGGAAATGAGGGCGCACGCGG  
AATGTTGAAATACTCAATCTTCTTTTCAATATTTAAGCATTATCAGGGTATTTGCTCATGAGCGGATACATATTTGAATGATTTAGAAAAATAAACAATAGGGTTCCG  
CGCACATTTCCCCGAAAAGTGCACCTGGT

# Supplementary Vector Sequences

evoA1-BE4max

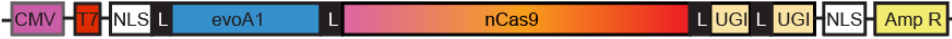

tagttattaatagtaatacaattacggggctcattagtctatagcccatataggagttccggttacataaacttacggtaaatggccgctggctgacccgccaaacgccccccccc  
 tagcgtcaaatagcgtatgttcccatagtaaacgccaaataggactttccataggctcaaatgggtggagatttacggttaactgccacttgccgtacatcaagtgtatcatatg  
 ccagtagccccctattgacgtcaatgacggttaaatggccgctggcattatgccagtcattgaccttatggactttctacttgccgtacatctactgtattgtcatcgctat  
 taccaatggtgacgtgggttttggcgtgacgtcaaatggcggggtagcgtttgacgtccgggatttccaagtctcccccattgacgtcaatgggagtgttttggcaccataat  
 aacgggactttccaaatgtctgaacaactccgccattggcgcaaatggcggtagcggtgacgtgggagtctatatagaagagactgggtttagtagaacctgcagatccgctag  
 agatccgccccctaatcaactcaactatagggaagcccccaccatgaaacggagacggcgaagagcaggttcgagtcacaaagaagaagcgaaactcagtccaagactgggc  
 ctctgcccgcgacaacgccacactggccgcggatgaaacctcaagcagtttgaaggtttcttggccccggagctgagaagggagacatgctgctgacgagatcaactggggaggc  
 agggactccattgaggcaccactctcagaacacaataaagcagctggaggtgaactctatcgagaagtttaccacagagcggtactctggcccaataccagatgtgacatcacatg  
 gttctgagctggtccctctcgaggcagatgacgagggccatccagcgttctgctccagatttccagctgacatgcaaatgtgacactgtttatctacatcgccggcgtgtaaccggaacccaa  
 ggaataggcaggggctgcggatctgatcagctccggcgtagccatccagatcatgacagagcagggtagcggctactgctggcaactctgtaattatctctagcacagctcc  
 cactggctagttaccacacactgtgggtgcgctgtagctgctggagctgtatgcatcctctggcctggcccttgtctgaatatctgcggagaagcagagccagctgacctc  
 tttcaaatcgccctgagctttgtcactatcagaggtgcaccaccaatctggtggccacagcctgaagctctggcggatctagcgaggatccttggcagcagaca**cccggga**  
 caacgagctcagaacaccagagcagctggcggaagcagcggccgagcgaagaagtacagcatcgccctggccctggccaccactctgtgggtggccgctgataccgcagcag  
 tacaaggctgccggcaagaatttccaagcgtggtggcaaacccgaccggcagcactcaagaagaactctcgaggccctgctgctgacagcggcgaacacggcggcccccagct  
 gaagagaaccgcagaagaatgacaccagacggaagaacccgattctgctatctgcaagagatctcagcaacagagtgcccaaggtggacgacgctctctccacagactggaaggt  
 cctctctggtggaagaggaagaagaacgacgagcccccattctgcgaactctgtggagaggtggctaccacgagaatgcccccacccttaccacactggaaaaaactggtg  
 gacagcccccagaaaggcagctgcgctgactatctgcccctggcccactgatcaagtctcggggcctgctgctgacgagggcagctgaacccccagccagccgctctggaa  
 gctgttcacagcagctggtgacagcacaacagctgttcggaggaaccccataccgcgagcctgagctggcgtgacggaaggtggggcagcctgtctggcagactgagcaaa  
 aactctgctgccccagctgcccggcagaagaagaatggcgttctggaacactgttgcctgacatgcaaatgtgacctgaccctgaaccccaactcgaagcaagctgataccggaagctgac  
 aactgcagctgagcaaggacactacgacgacgactggacaactgctggccagatcgccgaccagtagccgacgttcttggcccagaacactgtccgacccatcctgct  
 gaggcactcctgagagtgaacaccagagtcaccaagggcccctgagcgcctctatgatcaagagatcagcagcagcccaccagggactgacctgctgaaagctctgtggcgagc  
 agtgcctcgagaagtaacaagactttctctgcccagagcaagaacgctctcgcgctacattgacggcggagccagcgaagaagcttccaagactctccactcctgtggaa  
 aagattggcgccagcaggagaaactctgtctggaagtgaacagagagagactgctggcaagagcagcagcctctgcaacacggcagctccccaccagatcccactgggagagctgcaocg  
 caattgtccggcggcaagaattttaccactctgaaggaacaccggcgaagaagcctgagaaactcctgacatccctacagcggccctggccctggccctggccgggaaacga  
 gatctgacctggatgccagaagaagcggagaaacctaccacccctggaactctcgagaaggtggtggacaaggcggctctgcccagagcttcatcgagcggatgaccaactctgataag  
 aactgccccaacgagaagctgtcccgaagcagcagctgctgacagactcaaccctgtataacagcgtgaccaaaagtgaatacgtgaccgagggatggagaagcccctctct  
 gaggcgagcagcaaaaaggcctctggaactgctgttaagacaaacccgaagtgaacgctgaaagagcactactcaagaggactactcaagaggactctgcactctgactctgaa  
 ctctccggctggaaagactcggcttaaacgctccctgggcaacataccacagctctgctgaaattatacaagacagagactctggcaaatgaggaacacagagcactctggaagatc  
 ctgctgacctgacactgtttgaggacagagatgatcgaggaaacgctggaacacctgcccactctctgcaagcaaaagtgatgaagcagcagcctcaactcgacaacaccgctg  
 gggcaggtgagcggaaagctgatcaacgctctcgggcaaacagcctcggcaagcaactctggatttctgaaagctcgcagcctctgcccacagcaactctatgagctgatccac  
 acgacgctgaccttaaaaggacataccaagaagcccagcttccggccagggcagtagcctgcaagagcactgccaactctggcccagcccctccactaaagagggcactcct  
 caacagtgaaaggtggtgacgagctcgtgaaagtgatggcccggcacaagcccagagctgtaagcactctgtaaaatggccagagagaaaccagacaccccaggcaagaacccg  
 cgagagaatgaagcggatcgaagagggcctcaaaagactggcgagccagatctgaaagcaaccccgggaaaaccaccagctgcaagacgagaagctgacctgactacccgcaga  
 atggcgggaatgtagcctggacaggaactggcaatcaaccggctgcccagcaactctggactctctgcctcagagcttctgaaagcagcagcctcaactcgacaacaccgctg  
 accagaagcgaagaaccggggcaagagcacaactggcctccgaagaggtcgtgaagaagatgaagaactactggcgagctgctgaacgcaagctgataccacagaaaggt  
 cgcacatctgacaaagccgagagaggccgctgagcgaactggataagggcggcttcatcaagagacagctggtgaaaccggcagatcacaagacagctggccagatctggact  
 caactgaacactaagctgaagcagagaatgacaagctgacgggaggtgaagtgtaacccggtagccctgaactgaaaggggtgtccgattctccgaaagcttccaagctgccc  
 gagatcaaacactaccacacgcaccacagcagcctactgacggcgtctgcaacccggctgacaacccgctgatacaaaagtaccctgactggaaagagcagctctgctgaccgcaaggtgat  
 cgactgcggaagtctgctggaagagcggcagaactggcaaatcggcaagcacttctctcaagcaacatcagacttttcaagcagcagatctccctggcaccagcggc  
 agatccggaaagggcctctgatcgacaaaccggcaaacccgggagatcgtgggttaagggccggatcttgcacccctgcggaagagctggagatgcccccaagtgatattctg  
 aaaaagaccaggtgcagagagggcctcagcaaaagatctactctgcccgaagaagcagcgataagctgacccaagaaagagactgggaccccataagtgacgcccgtctoga  
 cagcccactggcctttctgtgctggtggcggcaagggtgaaagggagcaacaaatacaaaatgctgtctggcggctcaaaaagaaccggcagcggcaaggttcgagccatccag  
 tggagaaatccccactgacttctgaaagcgaagggctacaagaagtgtaaagggactgatcaactgctcgaactgctcgaactgctgaactgctgacacccagcctatgagaagctgga  
 gcaactgctgcccggactgcaactgcaagcgaactggcctgcccctgcaaaatctggaactctgtaactgctgacccagcactatgagaagctggccctggccctggcctccaggat  
 gaaacagctgctggtggaacgacacaagcactactggagagatcctcagagcagatcaggagcttctccaagagagctgatcctggccgacgcttaactggaacaaagtctgctccgct  
 caacaagcaccgggataagcccctcagagagcagccgagaatatacctaacttcttacactgaccaactctgggaccccctggccttcaagtagtggacacccactcagccgg  
 aagaggtacaccagcacaagaaggtgctggagcccactgatcccagagctctcaccggcctgacagagacaggtagacgttccaagctggaggtgacagccggggagcgg  
 cgggagcaggggagcacttaactgtagccacatcttgagaagaagactggaaaacagctggtctatcaggagctcactctgatgctgctgagaggtggagaaagtgatccggcaaca  
 agccagagtgcacactcctgtggaacagccctaacagagctccacagatgagaatgtagcctgtagcccccagtagtaagcctggccctggcctggcctggcctccaggatct  
 aacggcagaaataagatcaagatgctagccgaggatccggaggatctggaggcagaccacactgctgaacatctcagaaagagagagagcagcagctggtcatccagagagcact  
 cctgatgctgcccgaagaagtccaagaagtgcgtggaacacagcctgagagcagatacctggctcactaccgctcagcagagagtagccgacagaaaatgtagctgctgacatccagc  
 ccccagagataagcccctggccttctggtcattccaggattccaacggagagaaacaaatacaaaatgctgctggcgctcaaaaagaaccggcagcggaagtctcgagcccaagaag  
 aagaggaagtctaacggctcactcaccatccactaggtttaaaccgctgatacgctcagctgctgacctctgactgtgctctagttgccagcactctgtgtttgcccctccccctgcttcc  
 ttgacctggaaggtgcccactcccactgtccttctctaataaaatgaggaatctgcaacttgctctgagttaggtgctcattctctctgggggtggggtggcggagcagcaaggg  
 ggagattgggaagacaatagcagcagctgctggggatcggtggctctctgacctctgaggcggaaagaaccagctgggctcgtaccctgacctctagctagagcttgccgtaat  
 catgctcagctgcttctgctgtaaatgttatccgctcaaatccacacaactacgagccggagacataaagtgtaaagcctagggtgcttaagttagttagcttaactcacatta  
 attgctgctgctcactgccccttccagctcgggaacactgctgcccagctcctaatgaaatcgcccaaccggcgggaagggcgttgcctattggggcacttccgctctcct  
 gctcactgactcgtcgtcgtcgtctggctgcccggcagcggtagctcactcgaagcggtaactcggttatccacagaaatcaggggataaccgagaaagaactgtgagca  
 aagccagcaaaaaggcaggaaccgtaaaaggcggcgtgctggcgttttccatagctcggcccccctcagagcagcagcagcaacaaatacagcagctcaagtccagctggcgaacccc  
 acagagctataaagataccagcgtttcccctggagctcctcgtgcctctcctgctccagacctgcccgttaccggatacctgctccgcttctcctctcgggaaagcgtggcgt  
 tctcctagctcagctgtaggtatctcagctcgttaggtcctcgtcctcagctggcgtgtgtagcgaaccccctgtagcccgaccgctggcccttatccgtaactatcgtc  
 ttgagctcaaccggtaagacagcacttaccgactggcagcagccactggttaacagatttagcagcagcgggtatgtagggcgtgctgagagcttctgaaagctggcctaaactac  
 ggctacactagaagaactatgttggatctcgtcctgctgaagcagcttacctcggaaagagttggtagcctctgtagccggcaacaaaccacggctggtagcgggtgggttttt  
 tggttgcaagcagcagatcagccgcaaaaagaagctcctaagaaatccttgatctttctacggggtctgacactcagtggaacgaaaactcagtaagggatttggctatgag  
 gattatacaaaagatctcactagatcctttaaataaaatgaagttttaataactcaaaagtataatgagtaaactggctcagagctaccactgcttaactgagga  
 cctatctcagcagatctgtctattctgttcaatcagttgctgactcccgtgtgtagataactacgatacgggagggcttaccactggcccagctgctgaatgatacggggga  
 cccagctcaccggctccagatttatcagcaataaaccagggcgggaagggcgagcgaagaagtgtgctgcaacttctcggcctccactccagctatcaattgttgcccggaaag  
 cttagagtaagttagtcgcogatttaagtatttcgcgaagctgtttgccaattctcaagcactctggtctcgaacgctcgtctgtttgttatgctctcactcactcoggttccccagcagta  
 agggcagttacatgatcccccattgttggcaaaaaggcgtttagctccttctcgtctccagcttctgctgcaagaagtaagtggcccagctggtatcactcactggttgccagcaactgca  
 taattctctactgctcactccctgaagatgcttctctgtagctggtgagtaactcaaacagctcactctgagaatagttgatggcggaagcagctgctctcccggcctcaaat  
 gggtaataaccggccacatgcagaactttaaagctgctcactcaatggaaaagcttctcggggcgaacactcaaggatctaccgctgtagagcacttccagctgctgactaaccct  
 cgtgcaccacactgactctcagcaacttttacttccacagcgttctgggtgcaaaaagcaggaaggcaaaatggcgcgaaggggaaatggggcagaccgaagaaagtgtggaact  
 cactcttccccttttcaatattatgaaactttatcaggtttatgctcactgagccagatacatattgaaatgctattgaaaaaaataacaaaataggggctccggcactttcccc  
 gaaaagttcccactgacgtcagcagctcgggagctgctccagtagctcctcagtagctcctcagtaaaactctgctgtagccagctagctaaagcagtagctctccctctgtt  
 gttggaggctcgtgagtagtgccgagcaaaaattaaagtcaacaacaggaagctgaccgacaattgcatgaagaactcgtctagggttagggctttgctgctcggctgtc  
 accggccagatatacggctgacattgatttgac

# Supplementary Vector Sequences

## AID'-BE4max

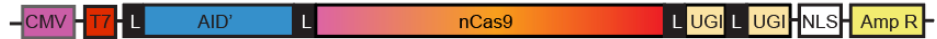

...gtcagatccgctagagatccggggccgctaatacgaactcaactataggagagagccgcaaccATGGATAGCCTGCTGATGAACCGTCGTgAATTTCTGTATCAGTTTAAAAACGTGCGTT  
GGCGAAAGGCCGTCGTGAACCTATCTGTGCTATGTGGTGAACCGTCGTGATAGCGCGACCCAGCTTTAGCCTGGATTTGGCTATCTGCGTAACAAAAACGGCTGCCATGTGGAACCTG  
CTGTTTCTGCGTTATATTAGCGATTGGGATCTGGATCCGGGCCGTTGCTATCTGTGACCTGTTTATCAGCTGGAGCCCGTGCATGATTTGCCGCGCTCATGTGGCGGATTTTCTGCG  
TGGAACCCGAACCTGAGCTGCGTATTTTACCAGCGCTGTGATTTTTCGGAAGCcGgcGcGtGAACCGGAAGCCCTGCGTCTGTCATCTGCGGGCGTGCAGATTGCGATTA  
TGACCTTTAAAGATTATTTTATTGCTGGAACACCTTTGTGGAACCACTGgAGCTACCTTTAAAGCGTGGGAAGCCCTGCATGAAAACAGCGTGCCTGTAGCCGCTCAGCTGCGTCTG  
ATTCTGCTGctggcggatctagcgaggatcctctggcagcgagaca**ccgggaca**caagcagagtcaacaacaccagagagcagtgccggcagcagcggcgccagc**gacaagaagtacag**  
caterggcctggccatcggaaccaactctgtgggtggccctgatacaccgacgagtaacaaggtgccagcaagaataccaaggtgctgggcaacaccgaccggcacaagcatcaagaaga  
acctgatcggagccctgctgttgcagacggcgaaacagccgagccaccggctgaagagaaaccgcaagaagaatcacaccagacggaagaaccggatctgctatctgcaagagatc  
ttcaagcaacagagatggccaaggtggacagacagctcttccacagactggaagagctcctcctggggaagagataaagaacacgagcggcaccctcttccgcaacctcgtggacga  
gggtggcctaccacagagaagtaccaccacctctaccacctgagaaagaacatggggagacgaccgacaagggcgacctggcgtgatctatctggccctggccacatgatcaagtcc  
ggggccactcctgatcgagggcgacctgaaccccgacaacagcgacctggcaaaagtgttccatccagctgggacacctacaacagctgttcgaggaaaaacccatcaacgcagc  
ggcgtggacgcaagccatctgtctgacagactgagcaagagcagcggctggaaaaatctgatcgccagctgcccggcgagaagaagaatggcctgttcggaaacctgatggcct  
gagcctgggctgacccccaaactcaagagcaactctgacctggccgaggtgcaaaactgcagctgagcaagggacacctacgacgacgacctggacaacctgctggccacagatcggg  
accagtagcccgacctgttctggccgcaagaacctgcccagccatcctgctgagcgcacctgagagtgaaacaccgagatcaaccaagccctctgagcctctatgatcaag  
agatatacagacgacaccaccagacctgacctgctgaaagctcctcgtggcgagcagctgacctgagaaagtacaagaagatcttctgaccagagacaagaacggctacggcgctacat  
tgacggcgagccagcgaagaggttctacaagttctcaagccctcctggaaaaagatggacggcaccggaaactgctcgtgaaagctgaacagagagacctgctgggaagcagc  
ggacctcgacaacggcagcatccccaccagatccacctgggagagctgcacgacctctcggggcgaggaagatcttaccatctctgaaggacaaccgggaaaaagacgagaag  
atcctgaccttccgcatccccactactcgtggccctctggccaggggaaacagcagatctcctggatgaccagaagagcggagaaacctcaacccctggaactcagagaaaggtgtg  
ggacaagggcgttcggccagagcttctcgagcgagatgaccaactctgataagaacctgccaacgagaaggtgctgccaagcagacctgctgacgactctcaaccgtgata  
acgagctgaccaaagtgaatacgtgaccgaggaatgagaagcccgctcctgagcggcgagcagaagaagggccatcctggacctgctgtcaagccaacccgaaagtgacctg  
aagccactgaaagagactactcaagaataatcgagtgcttcgactcctggaaatctcggcgtggaagatcgggtcaacgctcctggcaataccacagctcctgtaaaat  
caaggacaaggacttctggacaatgagaaaaacgaggacatctggaagataatcgtgctgacctgacactgtttgaggacagagagatgatcgaggaaacggctgaaaaacctatgcc  
acctgttcgacgacaagtgatgaagcagctgaagcggcgagatcacccggctggggcaggtgagccggaagctgatacaacggctcgggacaagcagctccggcaagcaaatcctg  
gatttctgaagtccgacggcttcgccaacagaacctctatgcagctgatccacgacacagcctgacctttaaagaggacatccagaagccaggtgctccggccagggcgacct  
gcacgagcacattgccaatctggccggcagccccaccttaagaagggcaatcctgcagacagtgaaagtggtggacgagctcgtgaaagtgatggcgccacaagcccgagaacatcg  
tgatcgaatggccagagagaaccagaccaccagaagggacagaagaacagcccgagagaaatgaagcggatcgaagagggcctcaaaagactgggacgacagctcctgaaagaacac  
ccctggaaaaacaccagctgcagaacgagaagctgtacctgtactacctgcagaatggggggatagtacgtggaccaggaactggacatcaacggctgtccgactacgatgtgga  
ccatatacgtgctcagagcttctgaagcagcactccatcgacaacaaggtgctgaccagaagcgacaagaacggggcaagcagcacaactgacctccgaagaggtcgtgaaagaaga  
tgaagaactactggcgagctgctgaacgccaagctgattaccagagaaagtctgacaactctgaccaagggcgagagagggcctgagcgaactggataagggcgctctcaacaag  
agacagctggtgaaaccccgagatcaaaagcagctggcacagatcctggactcccggatgaacactaagtacagcagagaatgacaagctgatccggaaagtgaagtgatcaccct  
gaagtcgaagctggtgctcgatctccggaaaggttccagtttacaagtgccggagatcaacaactaccaccaagcagcagcctacctgaacgctcgtgggaaccgctctga  
tcaaaaagtaccctaagctggaagcagctcgtgtaccggactacaaggtgtacagcgtcgggaagatgatcgcaagagcagcaggaaatcggaaggtaccgcaagctaccgcaagctctc  
ttctacagcaatcatgaacttttcaagaccgagataccctggccaacggcgagatccggaaagcggctctgatcgagacaacggcgaaacccggggagatcgtgtgggataaagg  
ccgggatttggccacctgcccgaaggtgctgagcatgcccgaagtgaatctcgtgaaaaagccggaggtgcagacagggcgcttcagcaaaaggtctatcctgcccgaaggaacagcg  
ataagctgatcgccagaagaaggactgggacctaaagaatcggcgcttcgacagcccaccctggcctatctgtgctggtggtggccaaagtggaaaagggcaagctcaagaaga  
ctgaagagtgtaagaagctgctggggtacacctatgaaagaagcagctcogagaagaatccatcgacttctggaagcgaagggctacaagaagtgaagaagggactgatcat  
caagctgctcaagctcctgttcagctggaaaacggccggaagagaatgctggcctctcggcgcaactgcagaagggaaacgaactggccctgcctccaaatagtgaactcc  
tgtacctggccagccactatgagaagctgaagggctccccgaggtaatgagcagaacagctgttctggaacagcacaagcactacctggacgagatcatcgagcagatcagcgag  
ttctccaagagagtgatcctggcgagcgtaatctggacaaggtgctgtccgctacaacaagcaccggataagccatcagagagcagggcagagaatcatccacctgttaccct  
gaccaatctgggagccctgcccctcaagactctgacaccacctcagccggaagaggtacaccagcaaccaagaggtgctggacgcccactgatccaccagagcatcaccggcc  
tgtacgagaaaggatcgacctgtctcagctgggaggtgacagcgccgggagcggcgagcaggggagcactaatctgagcgacatcattgagaagaagactgggaaacagctggtc  
attcaggagttccatctgatgctgctgaggagggtggaggaaagtgatcggcaacaagccagagctgacatcctgggtgacacccgctaccagagttccacagatgagaatgtgatgct  
gctgacctctgacgccccaggtataagccttggccctgtgctcaccaggtctaaacggcgagaataagatacaagatgct**agcggaggtaccggaggtctggaggcagc**accaacc  
tgtctgacatcatcgagaagggagcagggcaagcagctggctatccaggagagcaatctgatgctgcccgaagaagtcgaagaagtgatcggaacaacggctgagagcgatctctgggtc  
cataccgctacgacgagagtagccagcaaatgtgatgctgctgacatcgacgccccagagatataagcctgggctctggtctatccaggatccaacggagagaacaaatcaaat  
gct**ctggcgctcaaaaagaccgcccagcgagcgaagaaatcgagcccaagaagaagaggaagtctaa...**

# Supplementary Vector Sequences

## A3A-BE4max

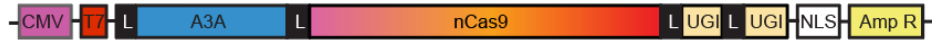

```
...gtcagatccgctagagatccgcgccgctaatagcactcactatagggagagccgccaccATGGAAAGCCAGCCAGCATCCGGGCCAGACACTTGTGGATCCACACATATTCACCTT  
CCAACCTTAACAATGGCATTGGAAGGCATAAGACCTACCTGTGCTACGAAGTGGAGCGCTGGACAATGGCACCTCGGTCAAGATGGACCAGACAGGGGCTTTCTACACAACCAGGCT  
AAGAATCTTCTGTGGCTTTACGGCCGCATGCGGAGCTGCGCTTCTTGGACCTGGTTCCTTTGCAGTTGGACCCGCCAGATCTACAGGTCACCTGGTTCATCTCCTGGAG  
CCCTGCTTCTCCTGGGGCTGTGCGGGAAAGTGGCTGCTTCTCAGGAGAACACACACGTGAGACTGGCTATCTTCGCTGCCCGCATCTATGATTACGACCCCTATATAAGGAGG  
CACTGAAATGCTGCGGGATGTGGGGCCAAAGTCTCCATCATGACCTACGATGAATTTAAGCACTGCTGGGACACTTTGTGGACCACCAGGGATGTCCCTCCAGCCCTGGGATGGA  
CTAGATGAGCACAGCCCAAGCTTGTGGAGGCTGCGGGCCATTCTCCAGATCAGGGAAACTctggcggatctagcggaggatccctctggcagcgagacaacccgggacaagcgagtc  
agcaaccacagagagcagtgccggcagcagcggcgagcgacaagaagtacagcagctggcctggccatcgccaaccaactctgtggctggcctgatcaccgacagtaacaagtgcc  
ccagcaagaaattcaaggtgctgggcaaacaccgacggcacaagcatcaagaagaacctgatcggagccctgctgttcgacagcggcgaacaacgcccagggccaccggctgaagagaacc  
gccagaagaagatacaccagacggaagaaccggatctgctatctgcaagagatctcagcaacagatggccaaggtggacgacagcttctccacagactggaagagctctctggt  
ggaagaggtgaaagaacgacgagcggcaccctcttoggcaacactcgtggacaggtggcctaccacgagaagtaccaccaccatctaccacctgagaaagaaactggtggacgaccc  
acaagggcagacctggcctgatctatctggcctggccacatgatcaaggtccggggccactctctgatcggggcgacctgaaccccgacaacagcagctggacaagctgttcatc  
cagctggtgcagacctacaaccagctgttcgagaaaccctcaacgcccagcggcctggcgaacagccatcctgtctgcccagactgagcaagcagcggctggaaaactctgat  
cggccagctgcccggcgagaagaagaatggcctgttcggaaacctgatggcctgagcctggcctgacccccaaactcaagagcaactctgacctggccggagatgccaacctgga  
tgagcaaggacacctacgacgacagctggacaacctgctggccagatcggcgaccgatcggccacctgttctggccgcaagaacctgtccgacgacctctgctgagcgaact  
ctgagagtgaaacccagatcaccaagggccctctgagcctctatgatcaagagatcagcagcaccaccagacctgacctgaaagctctcgtggcagcagctgctgca  
gaagtcaaaagagatttctctgaccagagcaagaacctacgcccgtacatgacggcgccagccaggaagagttctacaagttcatcaagccctctggaaaagatgga  
gcaaccggaaactgctcgtgaaagtgaacagagagacctgctcgggaacggcggcctggcacaacggcagcctccccaccagatccaccggagctgcaagcctctcgg  
cggcaggaagatttaccctctctgaaagcaaacgggaaagatcgagaagatctgacctctccgcatccccactactcgtggcctctggcaggggaaacagcagatctcggct  
gatgaccagaagagcggaagaacctaccctggaaactcaggaagtggtggacaagggcctctccgcccagagctctcagagcggatgaccaactctgataagaacctgcca  
acgagaaggtgctgcccgaagcagcctgctgtacgagtaactcaccgtgataaagagctgaccaagtgaaatcgtgaccagggaaatgagaagcccctctctgagcggcag  
cagaaaaagccatctggacctgctgtcaagcaaacgggaaagtgaacctgaaagcagctgaaagagagctactcaagaaaatcagtgctctgacctcgtgaaaactctccgct  
gaaagatcggttcaacgctcctggccacataccagatctgctgaaaattatcaaggacaaggactctcctggacaatgaggaacacgagggacatctggaagatctgctgctgacc  
tgacactgtttgagcagagagatgatcaggaacggctgaaacctatgcccactgttcgacgacaaagtgatgaagcagctgaaagcggcgagatcacccggctggggcagctg  
agccggaagctgatcaacgctcgggcaaacgctcggcaagacaactcctggatttctgaaagtcggcggctctgccaacagaaactctatgagctgatccacgacagagcct  
gacctttaaagaggacatccagaaagcccaggtgctcggccagggcagatagcctgcaagcagcaacttgcactctggcggcagccccccatcaagaaggcactctgacagcagtg  
aggtggtgacgagctcgtgaaagtgatgggcccgcacaagcccagaaactcgtgatcgaaatggccagagagaaccagaccaccagaagggacagagaagaacagccgagagaaatg  
aagcggatcgaagaggccatcaagagctggcagccagatctgaaagaaccccctgaaacaccccagctgcagaacgagaagctgacctgtactacctgcagaatggcgggga  
tatgtacgtggcaggaactggacatcaaccggctgctcagctacgatggaccatctgctgctcagagcttctgaaagcagctccatcgacaacaggtgctgaccagaagc  
acaagaccgggcaacagcgaacgctgcccctcgaagagctggaagagtgaaagaaactactggcggcagctgctgaaagcgaagctgatccacagaaagttcgcaactctg  
accagggcagagagggcctgagcgaactggataagggcggctctcaagagacagctggtggaaccccggcagatcacaagcagctggcagacatctggactcccggatgaa  
cactaagtacgacgagaatgacaagctgatccgggaagtgaagtgatcaccctgaagtcgaagctggtgctccgatttccggaaagatttccagtttacaagtgccgagatcaaca  
actaccaccacgcccacgacctaccctgaaagcctgctgggaaaccgctgatcaaaaagtaccctaaagctggaagcaggtctgctacggcagctacaaggtgtacgagctgctg  
aagatgatcggcaagagcagcaggaactcggcaaggtaccgccaagctactctctacagcaacatctgaacttttcaagaccgagattaccctggccaacggcagatccggaa  
cggcctctgatcgacaacacggcgaacccgggagatcgtgtggataaagggcgggttttgcaccctgcggaagtgtgagcagctgcccgaagtgatctggaacagctgctgctg  
aggtgacagagcggctcagcaaaagatctatcctgcccgaaggaacagcagatagagctgatcgcagaaaagagactggaccctaaagatcagcggctctgacagcccacc  
gtggcctattctgctgctggtggccaaagtggaaaagggcaagtccaagaacctgaagagctgaaagagctgctgggacaccatcatggaagaaagcagctctcagagaagaatcc  
catcgacttctggaagccaagggctacaagaagtgaaaaagacctgatcatcaagctgctcaagctcctctgctgagctggaacacggcgggaagaaatgctggcctctgccc  
ggaactgcagaagggaaacgaactggcctgcccctcaaatatgtgaactctctgactctggcagcactatgagaagctgaagggctccccgaggaatgatgacagaacacagctg  
ttgtggaacagcaaacactaccctggcagagatcagcagctcagcagctctcacaagagtgatctggcagcagctaatctggaacagctgctgctcgcctacaacaagca  
ccgggataagcccatcagagagcagccgagaatctaccacctgttaccctgaccaactctgggagccctgccccttcaagcttctgacaccaccatcgaccggaagaggtaca  
ccagcaccacaagaggtgctggacgcccacctgatccaccagagatcaccggcctgtacgagacacggatcgacctgctcagctgggaggtgacagcggcgggagcggcggagcag  
gggagcactaatctgagcagatcattgagaagaagactgggaaacagctggtcatcaggagctccatcctgatgctgctgagggaggtggaggaaatgctcggcaacaagccagagct  
tgacatcctggtgcaacaccgctacgacagctccacagatggaatgtgatgctgctgacctctgacgcccagagatataagcctgggcccctggtcatccagatctcaacggcgaga  
ataagatcaagatgctgagcggagatccggaggatctggagcagcaccacactgttgacatctcagaaagagacagcgaagcagctggtcatccagagagacatcctgatgctg  
cccgaagaagtcgaagaagtgatcggaaacaagcctgagagcyaatcctggtccataccgctacgacgagataccgacgaaatgtgatgctgctgacatccgacgcccagagta  
taagccctgggctctggtcatccaggatctcaacggagagaacaaatcaaaatgctgtctggcggctcaaaaagaaccgacggcagcgaatctcagaccaagaagaagagga  
tctaa...
```

# Supplementary Vector Sequences

## evoA1-seBE-T2A

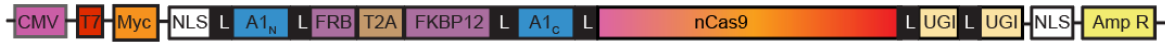

```
...gtcagatccgctagagatccgccccgctaatacagactcactataggagagccgccaccATGGAAACAAAACCTATTTCTGAAGAAGATCTGAAAAGGCCGGCGGCACGAAAAGG
CCGGCCAGGCCAAAAAGAAAAGGGAGGTTCCGCTAGCGGAGGTTTCGATGagttcaaaagactgggctgtgcgcgtcgatccaaccctgcccgcggattgaacctcagagtttgaa
gtgttctttagccccgggagctgagaaaggagacatgectgtacagagatcaactggggagggagccactccatctggaggccacacctcagaaacacaaataagcacgtggaggt
gaacttcacagagaagtttaccacagagcggacttctgccccGGCCGCCCGGAGGTTGGCAGCGGTGGAGGAGGTTCTGGGGGGCGTGGCTCAATTTTATGGCATGAGATGTGGC
ATGAGGGTTTGGAAAGGATCTAGATTGTATTTCGGTGAAGAAATGTCAAGGAATGTTCGAAATTTAGAACCGTTGCACGCTATGATGGAGAGAGGTTCCACAGACTTAAAGGAG
ACTTCTTCAACCAAGCTTATGGAAGGACCTAATGGAGGCTCAAGAATGGTGTAGAAAATACATGAAAAGTGGAAATGTAAGAGCACCTACACAGCTTGGGATCTCTACTACCATGT
TTTTAGGAGAATATCTAAAAGAAAGTGGTGGGGTGGGGAACTTATTAACCTGTGGGGATGTTGAAGAAAATCCAGGTCCTATGGCGCTACAAAGTTGAAACTATCAGCCCTGGGGACG
GCACACCTTCCGAAGAGGGGACAGACATGTGTTGTTTACTATACTGGAATGTTGGAAGATGTTGAAGAATGTTGATAGCAGCAGAGATAGGAATAAACCTTTAAATTCATGCTTGGC
AAGCAAGAGTGAATAGGGGTTGGGAAGAGGTTGTCGCTCAAAATGAGTGTAGGTCAGAGGGCTAAGTTAACAATTAGTCCTGATATTGCTTATGGCGCTACAGGTCATCCAGGAATCAT
TCCCCACATGCTACTCTTGTGTTTCAGCTTGAATTGCTTAAGCTTGAAGGATCAGGTTCTGGATCTGGATCAGGATCAGGCTCACCCGGCTTaataccagatgtagcatcacatggt
ttctgagctggtcccccttggcagagtgtagcagggccatcaccagttctgtccagatccaaatgtgacactgtttatctacatcgccaggctgtTaccctggcaaaccccaagg
aatgagcggctgcgcgatgacatcgctcggctgacctccagatctgcaagatcagcagagcaggatcctgctggcaaaactctgctgaaTtatctctcctcagcaacgagctcca
ctggcctaggtaaccacacctggtggtgcccctgtactgctgtagctgtagcctgcaatctcctgggagaaagcagagccagctgacctcct
ttacaatcgccactgcagctggtgactatcagagctgccccccaatcctggtggccacaggcctgaagtctggcggatcagcggaggatcctctggcagcgagacaccggca
agcagctcagcaacccagagtagcagttggcgacgagcggcgagcagcaagaagaagtagcagcggctggccatcgccaccactctgtgggtggcggctgacccgcagta
caaggctcccagcaagaattcaaggtgtgtggcaacaccgaccggcagcagcacaagaagaacctgtagcggacccctgctgttcgacagcgcgcaaacagccgagccaccggctga
atcgactgagcagcaaacctgacacagcagcaaacccgatctgctatctgcaagatctcgaacagagatggccaaggtggacgacagatcttcccacagactggaggtcc
ttctctggtggaagaggataagaagcagcagcagccaccctctcggcaacatctggcagaggtggcctaccacagagaagtaccaccactcaccacctgagaaagaaactggtgga
cagccacgcaagggcgacctggcgtgatctctgccccctggccccatgatcaagtccgggggcaactctctgatcgagggcgacctgaaccccagcaaacagcagctggacaagc
gtttctatccagctggtgcaacctcaaacagctgttcgaggaacacccatcaacgcaagcggtctggcagcagcggctggaccccaagcctcctgtctgcccagctgagcaagcagctggaa
aatctgatcgccagctgcccggcgagaagaagatggcctgttcggaacactgatggcctgagcctggcctgaccccccaactcaagagcaactcgacctggcgagatgcccc
actgcagctgagcaggaacctgacacagcagcactggacaacctgctggcccagatcggcagcagctgccaaggtggacgacagatggccaaggtgctccgacgcatctctgta
gacatcctgagagtgaacaccgagatcaccagccccctgagcgtctctatgatcaagagatcagcagcagcaccaccaggacctgacctgctgaaagtctctgtgcccagcag
ctgctgagaagtacaagagattttcttcgaccagagcaagaacctcagcggctcaactgacggcgagcaccagcaagagatcttcaagttctatcaagccccctctggaaaa
gatggagccagcaggaactctctgtaagctgaacagagagcactgctgggaagtagcggctcgcaaacgagcactcccccagctcactccctgagcagctggcaagcctgga
ttctctggcggcgaggaagattttaccatctctgaagacaaaccgggaaagatcagagaagatcctgacctccgcatcccctactacgtgggcccctctggccaggggaaacagaga
ttcctctggatgacagaaaagcagcaggaaccatcaacccctggaaactcaggaaggtggtggaacagggcctccgccagagctccatcgagcggatgaaccaactctgataagaa
cctgcccaacgagaaggtgctgcccaagcagcctgctgtacagacttaccctgtataaacgagctgaccaagtgaatacgtgaccaggggaatgagaaagcccgcctctctga
ggcgagcagaaaaagggcactctggaacctgctgtccaagaccacccgaaagtgacctggaagcagctgaaagaggactactcaaaaaactcagagctctgactccgtggaaatc
tcggcctggaagatcggttcaaccgctccctggcacaataccacagatctgctgaaatctcaaggacaaggaactctctggacaatgaggaacacgagggactctggaaagatcgt
gctgacctgacactgttggagacagagagatgatcgaggaacggctgaaacactatgccacctgttcagcagcaaggtgatgaagcagctgaaagcggcgagatcacccggctggg
gcagctgagcccgaagctgataacggcactccgggacaagcagctccggcaagaaactcctggatttctgaaagtccgacggcttcgccaacagaaacttoatgcagctgataccagc
gacagctgacctttaaagaggacatccagaaaagccaggctcggccagggcgatagcctgcacagacacattgccaactcggccgagccccgcattaaagggcactcctgca
gacagtagaggtggtgagcagctcgtgaaagtgtggcggcgcacaagcccagaaatcctgtagcgaatggccagagagaaacagcaccacagaaagggagcagaaagcagccgcg
agagaatgaagcggatcgaaggggcatcaagagctgggagccagatcctgaaagaaacccccgctggaacacccagctgcagaacgagaagctgacctgtactacctgcagaat
ggcgggatagtacgtggaccaggaactggacatacaaccggctgctcgactcagatgtagcactatctgctcagagctttctgaaagcagcctcactgcacaacagaggtgtgac
atccggaagggcctctgatcgagacaacccggcaaacccgggagctcgtgtgggataaaggccgggatttggccacctgcgaaagtctgagcactgcccacagctgaatcgtgaa
aaagaccgggtgcagacagccggctcagcaaaagatctctcggcaagagaaacagcagataagctgatcgccagaaagagggactgggacctaaagatcaggcggctctgaca
gccccacctggcctatctgtgctggtggtggccaaagtggaaaagggcagttcaagaaactgaagaggtgtgaaagagctggtgggatcaccatcaggaaagagcagctctgag
aagaatcccactgactttctggaaagcagggctcaaaaaggtgaaaagggactgatacaagctgacctgacctgctgagctggaaacggccggaagagaatgctggc
ctctgcccggcactcgagaagggaaacgaaactggcccctgcccctcaaatatgtgaaacttctgtacctggcagccactatgagaagctgaaaggctccccgggataatgagcaga
aacagctgttgggaaacagcaaacgcaactcaactggaagatcactcgagcagatcagagagttctccaaagagagtgatcctggccagcctaatctggaacaaagtctgctgcgctac
aacaagcaccgggatagcccactagagagcagggcagaaatataccacctgttaccctgaccaactcgggagcccctgcccctcagactttgacaccacctcgaccggaa
gaggtacaccagcaacaaagaggtgctggaccaccctgatccaccagagcaccacggcctgtagagacacggatcgacctgctcagctgggaggtgacagcggcgggagcggc
ggagcagggggagcactaatctgagcagcactatgagaaagaaactgggaaacagctggtctatcaggagtgccatcctgatgctgctgaggggtggagaaagttgatcgccaaag
ccagactcgacatcctggtgcaaccgctacagcaggtccacagatgagaatgctgctgctgacctctgaccccccgagtataagccttgggcccctggtcatccagagattctaa
cggcgagaatgaagatcaagatgctgacggagatccggaggtcaggcagcaccacacctgctgacatcagagaaggagacagggcaagcagctggtcatccagagagcagctcc
tgactgctcccgaagaagtcgaagaagtgatcggaaacaaagcctgagagcagatctctggtcctatccggcctcagcagagataccagcaaaaatgtgagctgctgacatccgagccc
ccagagatataagcctgggctctggtcactccaggatccaaccgggagagacaacaaatcaaatgctgtctggcgctcaaaaagaaccgccagcggagcgaattcgagcccaagaagaa
gagaaagtctaa...
```



# Supplementary Vector Sequences

## AID'-seBE-T2A

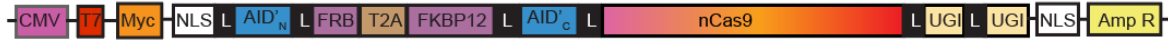

```
...gtcagatccgctagagatccggggccgtaatacagactcaactataggagagccgccaccATGGAAACAAAACCTTATTTCTGAAGAAGATCTGAAAAGGCCGGCGGCCACGAAAAAG
CCGGCCAGGCCAAAAAGAAAAAGGGAGGTTCCCGTAGCCGGAGGTTTCGATGGATAGCCTGCTGATGAACCGTCGTGAATTTCTGTATCAGTTTAAAAACGTGCGTGGCGCAAGGCCGT
CGTGAACCTATCTGTCTATGTGTGAACCGTCGTGATAGCCGCCACCGCTTACCGTGGATTTTGGCTATCTGCGTAACAAAACCGCTGCCATGTGGAACCTCGTTTTCTGCGTTA
TATTAGCGATTGGGATCTGGATCCGGCCGCCCGGGAGGTGGTGCAGCGGTGGAGGAGGTTCTGGGGCCGGTGGCTCAATTTTATGGCATGAGATGTGGCATGAGGGTTTGAAGAGG
CATCTAGATTGTATTTCGTGAAAGAAATGCAAGGAAATGTCGAAGTTTGAACCGTGCACGCTATGATGGAGAGAGGTCACAGACTCTAAAGGAGACTTCTTCAACCAAGCT
TATGGAAGGGACCTAATGGAGGCTCAAGAAATGCTGTAGAAAATACATGAAAAGTGGAAATGTAAGGACCTTACACAAGCTTGGGATCTCTACTACCATGTTTTTGTAGGAAATATCTAA
AGGAAGTGGTGGGGTAGGGGAAGTTTATTAACCTGTGGGGATGTTGAAGAAAATCCAGGTCCTATGGCGCTACAAGTTGAAACATCAGCCCTGGGGACCGCAGAACCTTCCGAAGA
GGGACAGACATGTGTGTTCTACTATAGTAATGTTGAAGATGGTAAGAAGTTCGATAGCAGCAGAGATAGGAATAAACCTTTAAATTCATGCTTGGCAAGCAAGATGATTAGG
GGTTGGGAAGAAGGTCTGCTCAAATGAGTGTAGGTGAGGGCTAAGTTAAACAATAGTCTGATATGCTTATGGCGCTACAGGTCATCCAGGAATCATCCCCACATGCTACTCT
TGTTTTGACGTTGAATTTAAGCTTGAAGGATCAGGTTCTGGATCTGGTTCCAGGATCAGGCTCACCCGGGCTTGGCCGTTGCTATCGTGTGCAACTGGTTTACAGCTGGAGCCCGT
GCTATGATTGCGCCGCTCATGTGGCGGATTTTCTGCGTGGCAACCCGAACCTGAGCTCGCTATTTTTACCGCCGCTCTGTATTTTTGGCAAGCgGgcaGgCGTGAACCCGAGGCCCTG
CGTCTGTGCATCGTGGCGGCTGCAGATTGGCATTATGACCTTTAAAGATATTTTTATTGCTGGAACACCTTTGTGGAAAACCTGgACGTACCTTTAAAGCTGGGGAAGGCCGTGCA
TGAAAACAGCTGCGTCTGAGCCGTCAGCTCGCTGATTTCTGCTGCTggcgctctcctgagcgaggaatcctctggcagcgagacaccggggacaacgagatcgcaacccaagagaga
gtgggcgcgacgagcgcgcgagcgacaagaagtacagcatcgccctggccatcgccaccaactctgtggctggccctgacaccgacgagacaaggtgcccagcaagaatacag
gtgctgggcaaacccgacccgcaagcatcaagaagaactgatcggagccctgctgttcgacagcggcgaacagccgagccaccggctgaaagagaaccggcaagaagatacac
cagacggaagaccggatctgctatctgcaagagatctcagcaacagatggccaagtggaacgacagctctctccacagactggaagagctcctcctggtggaagaggataagaagc
acgagcggcaccacctctcggcaacatcgtggacgaggtggcctaccacgagaagtaccaccacctaccacctgagaagaagaactggtggaacgaccgacaagggccgactcggg
ctgactatctggccctggcccaactgatacaagtccggggccactcctgctcagagggacactgaaacccgacaacagcagctggacaagctgtctaatccagctggtgcaagacta
caaccagctgttcgagaaaaccccatcaacccagcggcgtggacgccaagggccatcctgctgccagactgagcaagagcagacggctggaataatctgatcggccagctgcccggg
agaagaagagctgttcggaaaactgattgcccctgagcctggccctgaccccccaactcaagagcaactctcagctggccgagatgcaaaactgagctgagcaaggaacactac
gacgacgactggacaacactgctggccagatggcgaccagtagccgacactgtctggccccaagaacactgctcagcagcactcctgctgagcgacatcctgagagtgaacaccga
gatccaagggccccctgagcgctctatgatcaagagatacagcagcaccaccaggaactgacctgctgaaagctctcgtgcggaagcagctgctgagaagtacaagagattt
cttcctcagagagcaagaacggctacggcggctacatgacggcggaagccagccagccaggaaggttctacaagttcctcaagcccatcctggaaaagatggaagcagccaggaactcctc
gtgaagctgaacagagagagactcctcgggaagcagcggactctcagcaacagcagcactccccaccagatccacctgggagagctgcaccgcaatctcggcggcaggaagatttcta
ccactctggaaggaacaaccgggaaagatcggaaactcctgactcctcagcagcactactacgctggccctcctggccaggggaaacagcagatctcggctggatgacgaagaagc
aggaacacctcaccctggaactctgaggaagtggtggacaagggcgtctccggccagagctctcagcagggatgaccaactctgataagaactgccaacagagaaggtgctgcc
aagcagcctgctgtacgagtagctcaaccgtgataaacgagctgaccaagtgaaatcgtgaccgaggaatgagaagggccctcctgagcgcgagcagaaaaagggcctcgt
ggactgctgttccaagaccaaccgggaaagtgaactgaaagagactgaaagagactactcaagaaaactcctgagttgctcagctcctggaaatctcggcgatggaagatcgttcaacg
cctcctgggcacataccagatctgctgaaatatacaaggaagaagactcctggacaatgaggaaaaacaggaacatctggaagatactgctgacctgacctgttggagc
agagagatgatcgaggaacggctgaaaacctatgcccactgctcagcagcaactgatgaaagcagctgaagcggcgagatcacggcctgggcaagctgagccggaagctgatca
cggcatccgggacaagcagctcggcaagacaactcctggatctcctgaaactcagcagcctcggccaacagaactctcagcagctgatccacgacgacgactgacctttaaaggagaca
tccagaagcccaggtgctcggccagggcgatagcctgacagagcacttgccaatctggccggcagccccgccatagaagggcactctgcagacagtgaagtggtggcagagctc
gtgaaagtgatgggcccggcaaacccggagaactcgtgatcgaaatggccagagagaaccagaccaccagaaagggacagaaagacagccgagagagaatgaagcggatcgaaagggg
catcaagagctgggagcagatcctgaaagaacccccctggaacaccagctcagaaacagagaagctgtacctgtactacctgcagaatgggggggatgtactgtgacagcag
aactggacatcaaccgctgctccgactacgatgtggacctatcgtccctcagagcttctgaaagcagcactcctcagcaacaaggtgctgaccagaagcgaacaagccgggcaag
agcgacaactgcccctcgaagagctcgtgaaagaatgaaagaactactggcgagctgctgaaacccaagctgataccagagaaggtctgacaactctgaccaagggcagagaggg
cggcctgagcgaactggaatagggcggctctcaacaagagacagctggtgaaacccggcagatcaaaagcagctggcagagactcctggactcccggatgaacactaagtacgacgaga
atgacaagctgatccgggaagtgaagtgatcaccctgaaagccaagctggtgtccgattctggaaagatttccagtttcaaaagtgcgagagatcaacaactaccacaacggcccac
gacgctacctgaacccgctcgtggaaacggcctgatcaaaaagtaccctaaagctggaagcagagttcgtgtaccggcactacaaggtgtacagcgtgcggaagatgatcgccaagag
cgagcaggaatcgccaagctaccgccaagctcctctcagcaaacatcaatgaacttttcaagaccgagattaccctggccaacggcagagatccggaagcggcctctgatcgaga
caaacggcaaacccgggagatcgtgtggataaaggccggatcttggcaaccgtcgggaaagtgtgagcactgcccgaagtgaatctcgtgaaaaagaccgaggtgcagaacggcggc
tctcagaaagagctctactcggcaaggaacagcagataagctgatcggccagaaagaaggactgggacctagaagtagcggcgtctgacagccccaccctggcctattctgctgt
ggtggtggccaaagtggaaaagggcaagctcaagaactgaagagctgaaagagctgctggggtaccatctggaagaagcagctcagagaagaatccctcagcttctggaaag
ccaagggctcaaaagaagtgaaaaaggacctgatcaagctgctcaagctcctcctgtcagagctggaaaaacggcgggaagaaatgctggcctctcggcggcgaactgcagaagggga
aacgaactggcctgcccctcaaatatgtgaactctctgtacctggccagccactatgagaagctgaaagggctccccgaggaatgagcagaacagctgtttgtggaacagcaaca
gcaactacctggcagagatcatcagcagatcagcaggtctccaagagagatgactgcccagcctaatctggcaaaagtgtgtccgctcaacaagaaccgggataagccatca
gagagcggccgagaatcatccacctgttaccctgaccaactcgggagccccctggcgtccaagtagcttggaccaccactcagccggaagaggtacaccagcaccacaagaggtg
ctggagccaccctgatccaccagagatcaccggcctgtacgagacagagatcagactgctcagctgggaggtgacagcggcgaggcggcgaggcaggggagcctaatctgag
cgacatcattgagaagaagactgggaaacagctggtcattcaggaagctcactcctgatgctgctgagggaggtggggaaggtgatcggcaacaagccagagctgacatcctggtgaca
ccgctcagcagagctcacaagatgagaatgtgatgctgctgacctcagcggcccgagtagtaagccttgggcccctggtcattccaggatctaaogggogagaatagaatcaagatgctg
agcggagatccggagatctggagcagcaccaactctctgacatcatcgagaagagacagggcaagcagctggtcattccagagagatcctgatgctgcccgaagaagtctgaaga
agtgtcggaaaacagcctgagagcgaatcctggtccatccgctcagcagagagtagccgaaaatgtgatgctgctgacatccgacggccagagtagtaagcctgggctggtg
tcatccaggattccaacggagagaacaatacaaaatgctctggcgctcaaaaagaccggcagcagcgaatcagcccagaagaagagggaaagtctaa...
```



# Supplementary Vector Sequences

## evoA1-seBE-IRES

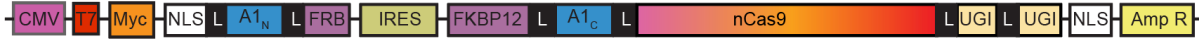

```
...gtcagatccgctagagatccggggccgtaaatcagactcaactataggagagccgccaccATGGAAACAAAACCTTATTCTGAAGAAGATCTGAAAAGGCCGGCGGCCACGAAAAAG
CGGGCAGGCCAAAAAGAAAAAGGAGGTTCCCGTAGCCGAGGTTCCGATGagtccaagactgggctgtcgcgcgtcgatccaacctggcgcgcggattgaacctcaagagtttgaa
gtgttctttgaccccgaggactgagaagaagagacatgcctgtgacgagatcaactggggagcgagcaactccatctggaggcaacctctcagaacacaaaataagcagctggaggt
gaactctatcgagaagtttaccacagagcggctactctccccGGCCGCCGGAGGTTGGGCGAGCCGTTCCGAGGCTTGGGGGGCGGTGCTCAATTTTATGGCATGATGTGGC
ATGAGGGTTTGGAGAGGCATCTGATTTGATTTTCGGTGAAGAAGATGCAAGGAAATGTCGAAGTTTTCGAACCGTTGCACGCTATGATGGAGAGAGGTTCCACAGACTCTAAGGAG
ACTTCCCTCAACCAAGCTTATGGAAGGGACCTAATGGAGGCTCAAGAATGGTGTAGAAAATACATGAAAAGTGGAAATGTAAGAGCCTTACACAGCTTGGATCTCTACTACCATGT
TTTTAGGAGAATATCTAAATAATGACCCCCCCCCCTAACGTTACTGGCCGAAGCCGCTTGGAAATAGGCCGGTGTGCGTTTGTCTATATGTTATTTCCACCATATTGCCGCTCTTTG
GCAATGTGAGGGCCCGAAACCTGGCCCTGTTCTTTCAGCAGCATTTCCTAGGGGCTTTCCCTCTCCGCAAGGAAATGCAAGGCTGTGTTAAATGTCTGTAAGGAAGCAGTTCCTCTG
GAAGCTTCTGAAGACAAACACGCTCTGTAGCAGCCCTTTCAGCAGCGGAAACCCCACTGGCGCAGGTTGCCTTGCAGCCGCAAGGCTGATGAAGTACACCTGCAAGAGCC
GGCAGCCCAAGTGCACACTTGTGAGTTGGATAGTTGTGAAGAAGTCAAAATGGCTTCTCAAGCTATTCAACAAGGGCTGAAGATGCCAGAGGTACCCATTGTTATGGGAT
CTGATCTGGGGCTCGGTGCACATGCTTTACATGTGTTTGTGAGGTTAAAACAGCTTAGGCCCCCGAACCCAGGGGAGCTGGTTTTCTTCGAAAACACGATGATTAATATGGCC
cccaagctgccACCATGGGCTACAAGTTGAACTATCAGCCCTGGGACCGCAGAACCTTCCGAAGAGGGGACAGACATGTGTTTCTCATACTGGAATGTTGGAAGATGGTAA
GAATGTGATAGCAGAGAGTAGGAAATAAACCTTAAATTCATGCTTGGCAGCAAGGAAATGTTAGGGGTTGGGAAGAAGGTCGCTCAAAATGTCTGTAAGGTTGAAAGATCAGTAA
TAACATTTAGTCTGATTTATGCTTATGGCGCTACAGGTATCCAGGAATCATCCCCACATGCTACTCTGTTTTCGACGTTGAATGCTTAAAGCTGAAAGGATCAGGTTCTGGATCT
GGTTCCAGGATCAGCTCACCCTGGGTTAataccagatgtagcatcacatggtttctgagctgggtccctctgcygagagtgtagcagggccatcacgagttcctgtccagataccgag
tgtgacactggttatctacatcgccAggctgtaTccctggcaaacccaagaaatagcagggcctgcccgatctgatcagctcggcgtgacctccagatcagcagagcaggagt
ccgctactgctggcaactctgtgaaTtattctctagcaacgagtcocactggctaggtacccaacctgtgggtgcccctgtacgtgtggagctgtatgcatcactctggcc
tgcacctgtctgtaactctgggagaaagcagagccagctgacctcttaaacatcgccctgagctcttgcactatcagaggctgccaacctcctgtggcccaacagcct
gaagctggggatctagcggaggatcctctggcagcagacacccggcaacagcagctcagcaaacaccagagagcagctggcggcagcagcggcgagcgaagaagatcacagatc
gctcggccactcggcaacctgtgtggcctgacccgagcagctacaaggttacaaggttcccagcaagaaatcaaggtgctggcaaacaccgagccagcatcaagaagcagct
atcggagcctgctgttcgacagcgccgaacagcggagccaccggctgaagagaaaccgcaagaagatcaaccagacggaagaccggatctgctatctgcaagagatctctag
caacagatggcaaggtggagcagcctctctccacagactggaagagctctctgtggagagagataaagaacagcagcggccacctctcggcaacctctggaagaggtgg
ctaccacagaagatcctccacctgagaagaactggtggcagcaaccgcaagggcagcctgggctgctctatctggcctggcccaacatgatcaactctccgggc
actctctgacgagggcagctgacccccgacaacagcagcgtggcaagctgctctccagctggcagacctacaacagcgtgtcgagaaaccccatcaacggcagcggcgt
ggacggcaacggcactcctgtctggcagactgacaaagcagcagcgtggaagaactctgagcagcctcggcggagagaagaagatggcctgtctggaaacctgatgcccagacc
tggcctgaccccccaactcaagagcaactctgacctggcagagatgcaaacctgcagctgagcaagacacctacagcagcagctggacaacctgctggcccagatcggcagacc
taagcagcagctgtctggcgcgaagaactctccagcgcactcctgctgagcagactcctgagagtgaaaccagagataccaagggccctgagcgcctctatgcaagagata
cgacgaccccagagactcagcctgctgaaagctctctggcagcagcctgctgagaagatcaaaagagatttctctgaccagagcaagaagcctaccccgctacatctgaag
cgggagccagccaggaagattctcaagattctcaagcccactctggaaaagatggagcgcaccagagaaactgctctgaaagtgaaacagagagagcctgctgggaagcagcggacc
tctcgaacagggcactcctgtctggcagactccccacagatccactggagagctgcacgacctctggcggcgcaagaaatctttacctctctgaaaggcaaacccggaaagatcgaaagatcct
gacctctccgatccccactactgctggccctctggccagggaaacagcagatctgcccgtggtgacagaagaagagcaggaaacctcaccctggaaactctgaggaagtgtggaaca
agggcgtctccggcagagctctcagcagagatgaccaactctgataagaacctgccaacgagaaggtgctgccaacgacagcctgctgacagactctaccgtgtataacagag
ctgaccaaaatgaaatcagtgaccgagactctgaaagctctctggcagcagcctctctgagcgagcagcagcaaaagcaccatcgtgacctgctgcaagaccggaaagtgacctgaaaga
gctgaaagagagactctcaagaaaatcgagctgctcagctcctggaaactctccggcgtggaagatcggctcaacggcctcctggcccaataccacagatctgctgaaaatctcaagag
acaagactcctggacaatgaggaagaacagagacatctggaaagatctgctgacacctgacactgctgagggacagagagatgctgaggaacggctgaaaacctatgcccactg
tctgacagaaaatgagcaagcctgaaagcagcagcaaccggcgtgggcaagctgagcgggaaagctgataacagcactcgggcaacagcagctcggcaagcaaatcctggatt
cctgaaagtcagagcctctggcaacagaactctcagcagctgataccacgacagcagctgaccttaaaagaggacatccagaaagcccaggtgctccggccagggcagatagctgcaag
agcacattgcaaatctggccggcagcccccattaaagaaggcactcctgcagacagtgaaaggtgtggcagagctctgaaagtgatggcggcccaagcccgagaactcctgctgata
gaaatggccagagagaaccagaccaccagaagggacagaagaacagcccgagagaaatgaagcggatcgaagagggcactcaagagctggcagccagatcctgaaagaacaccctg
ggaaaaccaccagctgcagaacgagaagctgacctgtactacctgcaaaatggcgggatactgactggaccaggaactggacatcaaccggctgctccagctacgatggaaccata
tctgtgctcagagctctctgaagacagactccatgacaacaaggtgctgaccaagaagcagaagaacccgggcaagagcagcaacctgcccctccgaagagctctgaaagaatgaa
aactactggcggcagctgctgaaagcagctgatcaccagagaaggtcgcacaactctgaccaagggcgagagagggcctgagcgaactggataagggccgctctatcaagagaca
gtgtggaaacccggcagatcacaagaacagctggcacaagatcctggactcccggatgagactcgggagagaaatgacaagctgataccgggagtgaaagtgatccccctgaaat
ccaagctggtgctccattctcggaaagattctcagatttacaagtgccggagatacaaacactaccaccagcccagcagcctacctgaacccgctctgggaaccggcctgatcaaa
aagtacctaaagctggaaagcagctctgtgacggcagctacaaggtgacagcctgcaagagatgacgcaagagcagcaagaaatcggaagctaccggcaagctctctcta
cagcaacatcatgaaactttctcaagacagagatcaccctggccaacggcgagatccggaagcggcctctgactgagacaacacggcgaacccggggagatcgtgtggataagggcgg
atcttggccctgcccgaagctgctgagcatgccccaaagtgaaatctgtgaaaagaccagaggtgcagcagggcggctcagcaagagctctatctgccaagaggaacagcgataag
ctgctcggcaagaagaagactgggacctaaagaatcagggcctctcgacagccccaccgtgacctattctgctgctgggtggccaaagtggaaaagggcaagctccaagaacctgaa
gagtgtaagagagctctggggatcaccatctgaaaagaagcagctctgagaagaatccccatgactctctggaagccaaagggctcaaaagaagtggaaaagggactgatctcaagc
tgcctaagctcctctgctgagctgaaaacggcgggaaagaaatgctggcctctgcccggcaactgcagaagggaaacgaactggcctgcccctcaaatatgtgaactctctgtac
ctggccagccactatgagaagctgaaagggctccccggagataatgagcagaacagctgcttgggaacagcaaacgactacctggcagagatcactgagcagatcagcaggtctc
caagagagtgactcctggcagcctaatctggcaaaagtgtctcgccctacaacaagcaccgggataagccccatcagagagcagggcagaatctcactccactgttaccctgacca
atctgggagccctgcccctcaagtactttgacaccacctgacgggaagagtgatccaccagacccaagaggtgctggagccacctgatccaccagagcaccaccggctgtac
gagacacggatcagactgtctcagctgggaggtgacagcggcgggagcggcgggagcagggggagcactaatctgagcagatcattgagaagaagactgggaaacagctggtctca
ggagctcactctgactgctgctgaggaggtggaggaagtgtcgcccaacaagcagagctgacatctcctgggtgcaaacggcctacagcagctccacagatgagaagtgtgactgctga
cctctgacggccccagatataagccttggccctggtctaccagatctcaacggcgagaataaagatcaagatgctgagcggagatcgggaggtctggagggagcacaacctgtct
gacatctcagagaagagacaggaagcagctggtctcagagagagcactcctgagctgcccgaagagctgaaagaagtgtatcggaaacaaagcctgagagcagatctctggtccatc
cggctcagcagagagttaccggcagaaaatgtgatgctgctgacatccgacccccagagataaagcctgggctctggtctatcagagatcccaacggagagaacaaaatcgaatgctg
ctggcggctcaaaaagaaccggcagcggcaggaatctgagcccaagaagaagaggaagtctaa...
```

# Supplementary Vector Sequences

## AID'-seBE-IRES

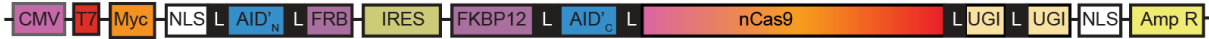

```
...gtcagatccgcctagagatccgcccgcctaaatcagcactcactataggagagcgcaccaccATGGAAACAAAACCTATTCTCTGAAGAAGACTCTGAAAAAGCCGGCCGACGAAAAGG
CCGGCCAGGCAAAAAGAAAAGGGAGGTTCCGCTAGCGGAGGTTCCGATGGATAGCCTGCTGATGAACCGTCGTGAATTCTGTATCAGTTTAAAAACGTGGCTTGGGCAAAAGCCGT
CGTGAACCTATCTGTGCTATGTGGTGAACCTCGTGTAGCGCGACCAGCTTTAGCCTGGATTTTGGCTATCTGCGTAAACAAAACGGCTGCCATGTGAACTGCTGTTCTGCGTTA
TATTAGCGATTGGGATCTGGATCCCGCCGCCGGGAGTGTGTGCAGCGGTGGAGGAGGTTCTGGGGCCGGTGGCTCAATTTTATGGCATGAGATGTGGCATGAGGTTTGAAGAGG
CATCTAGATTGTATTTCCGTGAAAAGAAATGTCAGGGAATGTTCCGAAGTTTGAAGCCGTTGCACGCTATGATGGAGAGAGGTCCACAGACTTAAAGGAGACTTCTTCAACCAAGCT
TATGGAAAGGACCTAATGGAGCTCAAGAAATGGTGTAGAAAATACATGAAAAGTGAAAAGACCTTACACAAAGCTTGGGATCTTACTACCAATGTTTTTAGGAGAAATATCTAA
ATAATGACCCCCCCCCCTAACGTTACTGGCCGAAGCCGCTTGGAAATAGGCCGGTGTGCGTTTGTCTATATGTTATTTCCACCATATTTGCCGTCTTTGGCAATGTGAGGGCCCCGA
AACCTGGCCCTGTCTTCTTACAGGACATCTTAGGGGTCTTTCCCTCTCGCCAAGGAATGCAAGGTCGTGTGAATGTCGTGAAGGAAGCAGTCTCTGTGGAAGCTTCTGAAAGCAA
ACAACGCTCTGTAGCGACCTTTGCAAGGACGCGAAACCCCCACCTGGCGACAGGTGCCCTCTCGGCCAAAAGCCAGCTGTATAAGATACACCTGCAAAAGCCGCCACAACCCAGTCCCA
CGTTGTGAGTTGGATAGTTGTGAAAGAGTCAAAATGGCTCTCTCAAGCGTATTCAACAAGGGGCTGAAGGATGCCAGAGGTTACCCATTTGATGGGATCTGATCTGGGGCTCGGT
GCACATGCTTTACATGTTTTAGTCAGGTTTAAAAAACCTTAGGCCCCCCGAACCCAGGGGACCTGGTTTTCTCTTGA AAAACACGATGATAATATGGCCcacaagcttgccACCATG
GGCGTACAAGTTGAAACTATACGCTGGGGACGGCAGAACCTTCCGAAGAGGGGACAGACATGTGTTTCACTATACTGGAATTTGGAAGATGGTAAAGATTTCATAGCAGCAG
AGATAGGAATAAACCATTTAAATTCATGCTTGGCAAGCAAGAGTGTATAGGAGTTGGGAAGAGGTTGCTGCTCAATGAGTGTAGGTCAGGGGTAATGGCAATATGCTGCTGGA
ATGCTTATGGCGCTACAGTCACTCAGGAATCATCCCCACATGCTACTCTGTTTTGCGAGTTGAAATGCTTTAAGCTTGAAGGATCAGGTTCTGGATCTGGTTCAGGATCAGGCTCA
CCCCGGCTTGGCGTTGCTATCTGTGACCTGGTTTATCAGCTGGAGCCCGTGTATGATGCGCGCTCATGTGGCGGATTTTCTGCTGGCAACCCGAACCTGAGCTGCGTATTTT
TACCGCGCTCTGATTTTTTGGCAAGCGcGcaGgCGTGAACCGGAAGCCCTGCGCTGCTGCTGCTGCGCGGGCTGCAGATTCGGATTTAGACCTTTAAAGATTTATTTTATGCTGGA
ACACCTTTGGGAAAACCTAGCAGTACTTTTAAAGCGTGGGAAGGCCCTGCATGAAAACAGGTCGCTCTGAGCCCTCAGCTGCGTCTGATTTCTGTGcttggcggatctagcggagga
tctcttggcagcagacacccgggacaagcgagtcagcaacaccagagcagtgggcgcagcagcggcggcagcgaacaagaatcacagatcggcctggccatggccaccaactctgt
gggctggcggctgatcaccgacgagtacaaagtggccagcaagaatcacaagtgctgggcaacaccgaccggccacagatcaagaagaacctgatcggagcctgctgttcgacagcg
cgcaaacagccgagggccaccggctgaagagaaccgccagaagaagatcacacagcaggaagaacctgctctatctgcaagagatctcagcaacgagatggccaaagtggaagc
agctctctcacaagactggaagagctctctctgtggaagaggaataagaagcagcagcagcggcaccocctctctggcaaacatcgtggaagagtggaagagtggtcctaccacagc
ctcaccacctgagaagaactggtggcagcagccagcaagccgacctggcctgatctatctggcctggccacatgatcaagttccggggccactcctgatcggagggcagctga
accocgacaacgcagcagtggaacaagctgtctcaccagctggtgcagacatcaaacaccagctgttcgagaaaaaccocctcaacgccagcggcgtggagcccaagccactctgtctgcc
agactgagcaagagcagcagcgtggaaaatctgatcgcaccgctggccggcagagaagaatggcctgttcggaaaacctgatcgcctgagcctggcctgaccocccactcagaag
caactcgcactggcggaggtgccaactgcagctgagcaagacacctcagcagcagacctggacaacctgctggccagatcggcgaccagtcagcggcactgtcttctggcccca
agaacctctcagcagcctcctgctgagcagactcctgagagtgaaacagcagatcaaccaagcagcctgatcagcctctatgatcaagagatcacagcagcaccacagcagctgacc
ctgctgaaagctctcgtgcgccagcagctcctgagaagtcaaaagagattctctcagaccagagcaaacagcggctacgcggctacatgacggcgagcagcagcagaagagctcta
caagtctcaacagccatcctggaaaagatggcggcagcaggaactgctgctgaaagtgaaacagagagcagcctgctgggaagcagcggcctcgcacaacggcagcctccccacc
agatccacctgggagagctgcacgccatctcggcggcaggaagatttctaccocctcctgaagcacaacgggaaaagatcgagaagatcctgacctcggcctccccactacgtg
ggcctctcggccgggaaaacagcagatcgcctggatgaccagaaaagcggaggaaccatcaccocctggaaactcggaggaagtggggaacagggcctcggccacagactctat
cgaagctgatcaccagagactctcgaactctgcacaactcgcacaagggcagagagcggcctgagcgaactggaataagggcggctctcacaagagagcagctggggaaccccgagatcaca
aagcagctggcagagatcctggactccccgatgaacactaaagtacgacagagaatgacaagctgatccgggaagtgaagtgatcaccctgaagtccaagctggtgtccgatctccggaa
ggatttccagtttacaagtgcccgagatcaacaactaccaccagcaccagcagcctacctgaacggcctgctgggaaccggcctgatcaaaaagctccctaaagctggaagcagct
ctggttacggcagactacaagctgacagcagctgggaagatgatcgccaagagcagcaggaatcgccaagcctaccggcaagctactctctacagcaaacatcagaaacttctcaag
accgagattaccctggcaacggcagagatcgggaagcggcctctgatcagacaaaacggcgaacccgggagatcgtgtgggataagggccgggatttggcaccctgcggaagtgct
gagcatgcccgaagtgaatctcgtgaaaaagcagcaggtgcaagcagcggcctcagcaaaagagctctatcctgcccgaaggaacagcagataagctgatcgccagaaaagagactggg
accctaaagaagtcagcggcctcgcagaccccacgctggcctatctgtgctggtggtggccaaagtggaaaaggcagctccaagaacctgaagagtgtaagagagctgctgggatac
accatcattgaaaagaagcagcttcgagaagaatccatcgacttctggaagcacaagggctcaaaaagtgaaaagagcctgatcatcaagctcctaaagtactcctgtcagatc
ggaaaacggccggaagagatgctggcctcctcggcgaactgcagaagggaaaagcagctggcctgcccctcaaaatctggaactcctgacactggccagcactatgagaagctga
agggctccccaggagataatgagcagaacagctgttctggaacagcacaagcactacctggacagatcctcagcagatcagcagctctccaagagagtgatcctggccagcct
aatctggcaaaagtgtctccgctacaacaagcagcgggataagccatcagagagcagcggcagaaatcctaccctgtttaccctgaccaatctgggagcccctgcccctccta
gtactttgacaccacatcgaccgggaagaggtacaccagcaccacaagaggtgctggagccacctgatccaccagagatcaccggcctgacgagacagcagctcagcctgtctcagc
tggaggtgacagcggcgggagcggcgggagcgaggggagcactaatctgagcagcacttgggaagagactgggaaacagctggtctcagaggtccatcctgatgctgctgag
gaggtgggaagagtgatcggcaacaagcagagctgacactcctggtgcaaccggcctcagcagagctccacagatgagaatgtgatgctgctgacctctgacgccccagatataagcc
ttggccctggtctcagagattctaacggcagataaagatcaagatgctgagcggagatcgggagatctggaggcagcacaacctgctgacatctgagaagagagcagcagcga
agcagctggtctccagagagagctcctgatgctggccgaagaagctcgaagaagtgatcggaaaacagcctgagagcagatcctggtccataccgctcagcagagagctaccgagaa
aatgtgatgctcctgacatccagcagccccagagataaagccctgggctggtctcctcagagattcccaagggagagacaaaatacaaatgcttctggggctcaaaaagaaccggca
cggcagcgaattcagaccgaagaagagaggaagtctaa...
```













## Supplementary Vector Sequences

CATTCTCGCCCCATGGCTGACTAATTTTTTTATTTATGACAGAGCCGAGGCCGCTCGGCTCTGAGCTATTCCAGAAGTAGTGAGGAGGCTTTTTTGGAGGCCATAGGACGTACCC  
AATTCGCCCTATAGTGAGTCTGATTACGGCGCTCACTGGCCGTCGTTTTACAACTGCTGACTGGGAAAACCTGGCGTTACCCAACTAATCGCCTTGACACACATCCCCCTTCGC  
CAGCTGGCGTAATAGCGAAGAGGCCCGCACCGATCGCCCTCCCAACAGTTGCGCAGCTGAATGGCGAATGGGACGCGCCCTGTAGCGGCGCATTAAGCGCGCGGGTGTGGTGGTTA  
CGCGCAGCGTGACCGCTACACTTGCAGCGCCCTAGCGCCGCTCCTTTGCTTTCTTCCCTTCCTTTTCGCGCAGTTTCGCGGCTTTCCCGTCAAGCTCTAAATCGGGGGCTCCCT  
TTAGGGTTCCGATTTAGTCTTTACGGCACCTCGACCCCAAAAAAATGATTAGGGTGTGGTTACAGTAGTGGCCATCGCCCTGATAGACGGTTTTTCGCCCTTTGAGTTGGAGTC  
CACGTTCTTTAATAGTGGACTCTGTTCCAACTGGAACAACACTCAACCTATCTCGGCTATTCTTTTGGATTATAAGGGATTTGCGGATTTGCGGCTATTGGTTAAAAAATGAGC  
TGATTTAACAAAAATTAACGGAAATTTAACAAAAATTAACGCTTACAAATTAAGGTGGCACTTTTCGGGAAATGTGCGGGAACCCCTATTTGTTTTATTTTCTAAATACATTCAA  
ATATGTATCCGCTCATGAGACAATAACCTGATAAATGCTTCAATAATATGAAAAAGGAAGAGTATGAGTATTCAACATTTCCGTGTGCGCCCTTATCCCTTTTTTGGCGCATTTTTGC  
CTTCTCTTTTTGCTCACCAGAAACGCTGGTGAAGTAAAAGATGCTGAAGATCAGTTGGGTGCACGAGTGGGTACATCGAACTGGATCTCAACAGCGGTAAGATCCTTGAGAGTTT  
TCGCCCCGAAGAACGTTTTCCAATGATGAGCACTTTTAAAGTTCTGCTATGTGGCGCGGATATTATCCCGTATTGACGCGGGCAAGAGCAACTCGGTTCGCCGATACACTATTCTCAGA  
ATGACTTGGTTGAGTACTCACCAGTACAGAAAAGCATTTACGGATGGCATGACAGTAAGAGAATTATGAGTGTGCCATAACCATGAGTGATAACACTCGGCCAACTTACTTCTG  
ACAACGATCGGAGGACCGAAGGAGTAAACCGCTTTTTGCACAACATGGGGGATCATGTAACCTCGCTTGATCGTTGGGAACCGGAGCTGAATGAAGCCATACCAACGACGAGCGTGA  
CACCAGATGCCTGTAGCAATGGCAACACCTGTGGCAAACTATTAACGTGGGCAACTTACTCTAGCTTCCCGCAACAATTAATAGACTGGATGGAGCGGATAAAGTTGCAGGAC  
CACTTCTGCGCTCGGCCCTTCGGCTGGTGGTTTTATGCTGATAAATCTGGAGCCGGTGGCGTGGGTCTCGCGGTATCATTGCAGCACTGGGGCCAGATGGTAAGCCCTCCCGTATC  
GTAGTTATCTACACGACGGGGAGTCAGGCAACTATGGATGAACGAAATAGACAGATCGCTGAGATAGGTGCCCTCACTGATTAAGCATTGGTA) CTGTACAGACCAAGTTTACTCATATAT  
ACTTTAGATTGATTTAAAACCTCAATTTTAAATTTAAAAGGATCTAGGTGAAGATCCTTTTTGATAATCTCATGACCAAAATCCCTTAACGTGAGTTTTCGTTCCACTGAGCGTCAGACC  
CCGTAGAAAAGATCAAGGATCTTCTTGAGATCCTTTTTTCTGCGGTAATCTGTGTTGCAAAACAAAAAACCCCGCTACCAGCGGTGGTTTTGTTGCGGATCAAGAGTACCA  
ACTCTTTTTCCGAAGGTAACCTGGCTTCAGCAGAGCGCAGATACCAAAATCTGTTCTTCTAGTGTAGCCGTAGTTAGGCCACCCTTCAAGAACTCTGTAGCACCGCTACATACCTCGC  
TCTGCTAATCCTGTTACCAGTGGCTGCTGCCAGTGGCGATAAGTCTGTCTTACCAGGTTGGACTCAAGACGATAGTTACCAGGATAAGGCGCAGCGGTGGGCTGAACGGGGGTTGCT  
GCACACAGCCAGCTTGGAGCGAACGACCTACACGAACTGAGATACCTACAGCGTGAGCTATGAGAAAGCGCCACGCTTCCGAAGGAGAAAGCGGACAGGTATCCGGTAAGCGGC  
AGGTCGGAAACAGGAGAGCGCACGAGGAGCTTCCAGGGGAAACGCTGGTATCTTTATAGTCTGTGCGGTTTCGCCACCTTGACTTGAGCGTCGATTTTTGTGATGCTCGTCAGG  
GGGGCGAGCCTATGAAAAACGCCAGCAACGCGGCTTTTTACGGTTCCGCGCTTTTGTGGCTTTTGTGTCACATGTTCTTCTGCGTTATCCCTGATTTGTGGATAACCGTA  
TTACCCTTTGAGTGAGCTGATACCGCTCGCCGAGCGAAGCAGCGAGCTAGTGTAGCGAGGAAAGCGGAAAGAGCGCCCAATACGCAAAACCGCTTCCCGCGCGTGG  
CCGATTCATTAATGACGCTGGCAGCAGAGTTTCCGACTGAAAAGCGGGCAGTGAGCGCAACGCAATTAATGTAGTTAGTCACTATTAGGCACCCAGGCTTTTACTTTATGCT  
TCCGCTCGTATGTTGTGGAATTTGAGCGGATAACAATTTACACAGGAAACAGCTATGACCATGATTACGCCAAGCGCGCAATTAACCTCTACTAAAGGGAACAAAAGCTGGAGC  
TGCAAGC



## Supplementary Vector Sequences

ggcgtaatagcgaagaggcccgaccgatgccttcccaacagttgcgagcctgaatggcgaatgggacgcgcctgtagcggcgcataaagcggcggtgtggtggttacgocg  
agcgtgaccgctaaccttgcagcgcctagcggccctcttctcgtttcttcccttcttctcgcacagttcggcggttccccgtcaagctotaaatcgggggtccctttagg  
gttccgatttagtgccttaccggacactcgacccccaaaaacttgattagggatggttcaactgagtgggcctgcacctgatagacgggttttcgccccttgacgttgaggtccacgt  
tctttaatagtgactcttgttccaaactggaacaacactcaacctatctcggtctattcttttgattataagggattttgocgatttcggcctattggttaaaaaatgagctgatt  
taacaaaaatthaacgcgaatthaacaaaaatthaacgcttaacaatttaggtggcacttttcgggaaatgtgocggaaccctatttggttattttctaaatacattcaaatatg  
tatccgctcatgagacaataaacctgataaatgcttcaataatataaaaaggaagagatgagatatacaacttccggtgcacctattccctttttgcggtattttccttcc  
tgtttttgctcaccgagaacgctggtgaaagtaaaagatgctgaagatcagttgggtgcacgagtggttacatcgaactggatctcaacgoggttaagatccttgagagttttcgc  
cogaagaacgtttccaatgatgagcacttttaaagttctgctatgtggcgggtattatcccgtattgacggcggaagagcaactcggtcgocgatacacatttctcagaatgac  
ttggttgagtactcaccagtcacagaaaagcatcttacggatggcatgacagtaagagaattatgagtgctgccataaccatgagtgataaacactgcccgaacttacttctgacaac  
gatcggagaccgaaaggagctaacgcctttttgcaacaacatggggatcatgtaactgccttgatcgttgggaaccggagctgaatgaagccataccaaacgacgagcgtgacacca  
cgatgctgtagcaatggcaacaactgtgcgaaactatctaactggcgaactacttactctagcttcccggaacaattaatagactggatggaggcgataaaagttgcaggaccactt  
ctgogctcggccttccgctggtggtttattgctgataaatcggagcgggtgagcgtgggtctcgggtatcattgcagcactgggocagatggttaagccctcccgtatcgtagt  
tatctacacgacggggagtcaggcaactatggatgaacgaaatagacagatcgctgagataggtgcctcactgattaagcattggtaactgtcagaccaagttactcatataacttt  
agattgatttaaaacttcattttaatttaaaaggatctaggtgaagatccttttgataatctcatgacaaaaatcccttaacgtgagtttctgctccactgagcgtcagaccctgta  
gaaaagatcaaggatcttcttgagatcctttttctgcgctaatctgctgcttgcacaaaaaaaccacgcctaccagcgggtggtttggttgcggatcaagagctaccaactct  
tttccgaaagtaactggctcagcagagcagataccaaaactgttctctctagctagcctgagtagggccaccactcaagaactctgtagcaccgctacatacctcgtctgc  
taactcgtttaccagtggtgctgctgccagtggtgataagtcgtcttaccgggtggactcaagacgatagttaccggataagggcagcggctcgggtgaaacggggggtctgtgaca  
cagcccagcttgagcgaacgacctacaccgaactgagatacctacagcgtgagctatgagaagcggccagcttcccgaaggagaagggcagcaggtatccggttagcggcaggggt  
cggaaacaggagcgcacgaggagcttccaggggaaacgcctggtatctttagtctgctcgggttccgcaacctctgacttgagcgtcgattttgtgatgctcgtcaggggggc  
ggagcctatggaaaaacgccagcaacgcggccttttacggttccctggccttttgctggccttttgctcacatggtcttccctgcttatccctgattctgtggataaccgtattacc  
gccttgagtgagctgataccgctcgcgcagcgaacgaccgagcagcagtcagtgagcaggaagcgggaagagcggccaatcgcgcaaacggcctctcccgcgcttgggcgat  
tcattaatgagctggcagcagcaggtttcccgactggaaagcggcagtgagcgaacgcaatataatgtagttagctcactcataggcaccocaggctttacactttatgctcgg  
ctcgtatggtgtggaattgtgagcggataacaatttcacacaggaacagctatgaccatgattacgccaagcggcaatcaacctcactaaaggaacaaaagct



## Supplementary Vector Sequences

gttgcgcaaaactattaactggcgaactacttactctagcttcccggcaacaataatagactggatggaggcggataaaagtgcaggaccacttctgcgctcggccctccggctggct  
ggtttattgctgataaatctggagccggtgagcgtgggtctcgcggtatcattgcaagcaactggggcagatggtaagccctccogtatcgtagttatctacacgacggggagtcaaggca  
actatggatgaacgaaatagacagatcgcctgagataggtgctcactgattaagcattggtaactgtcagaccaagtctactcatatatactttagattgatttaaaacttcattttta  
atttaaaaggatctaggtgaagatcctttttgataatctcatgacaaaaatcccttaacgtgagtttctgtccactgagcgtcagaccctagaaaagatcaaaagatccttcttgag  
atccttttttctgcgctaactctgctgcttgcaacaaaaaaaccaccgctaccagcgggtgtttgttgccggatcaagagctaccaactccttttccgaaagtaactggctcagc  
agagcgcagataccaaatactgttcttctagtgtagcgttagttaggccaccactcaagaactctgtagcaccgctacatacctcgtctgctaactcctgttaccagtggctcagc  
cagtggcgataaagtcgtgtcttaccgggttggaactcaagacgatagttacggataaaggcgcagcgggtcgggctgaacgggggttcgtgcacacagccagcttggagcgaacgact  
acaccgaactgagatacctacagcgtgagctatgagaaagcgcacgcttcccgaagggagaaaagcggacaggtatccggtaagcggcagggctggaacaggagagcgcacgagggag  
cttccaggggaaacgctggtatcctttatagtcctgtcgggttcgccaactctgacttgagcgtcgattttgtgatgctcgtcagggggcggagcctatggaaaaacgccagcaa  
cgcggccttttacggttcctggccttttgctggccttttgctcacatgttcttctcgttaccctgatctgtggataaccgtattaccgctttgagtgagctgataccgctc  
gccgcagccgaacgaccgagcgcagcagtcagtgagcggaggaagcggagagcgcacaaacgcacccctcctcccgcggttggccgatcattaatgcagctggcagcagcagc  
tttcccgactggaaaagcggcagtgagcgaacgcaattaatgtgagtagctcactcattaggcaccocagccttacaacttatgctccggctcgtatgttgtgtggaattgtgag  
cggataacaatttcacacaggaacagctatgacatgattacgccaagcgcgaattaaccctcactaaaggaacaaaagctggagctgcaagc



## Supplementary Vector Sequences

aggcgcgaggccgctcggcctctgagctattccagaagtagtgaggaggctttttggaggcctagggacgtaccaatcgccctatagtgagtcgtattacgcgctcactggccg  
tcgtttacaacgtcgtgactgggaaaacctggcgttaccocacttaatcgcttgcagcacatccccctttogccagctggcgtaatagcgaagagcccgaccgatcgccctcc  
caacagttgcgcagcctgaatggcgaatgggacgcgccctgtagcggcgcataaagcggcggtgtggtggttacgcgagcgtgaccgctacacttgcagcgccctagcggccg  
tcctttcgctttctcccttctctcgcacgcttgcggccttccccgtaagctcctaatacggggctccctttagggttccgatttagtgcttaacggcaccctcagcccaaaa  
aacttgatagggtgatggttcacgtagtgggccatcgccctgatagacggttttgcgcccttgacgttggagtcacgcttcttaatagtggaacttgttccaaactggacaaca  
ctcaacctatcgcgtctattctttgatttataaggattttgcccgtattcggcctattggttataaaatgagctgatttaacaaaaatataacgcaattttaacaaaaatataac  
gcttacaatttaggtggcacttttcgggaaatgtgcgggaacctatttggttatttttctaatacattcaaatatgtatccgctcatgagacaataacctgataaagtctca  
ataatattgaaaaaggaagatgatgatcaacattccgtgtgcgccctattccctttttcggcattttgcctcctgttttgcctaccacagaacgctggtgaaagtaaaag  
atgctgaagatcagttgggtgcacgagtggttacatcgaactggatctcaacagcggtaagatccttgagagttttcggcccgaaagcgttttccaaatgatgagcacttttaaagtt  
ctgctatgtggcgggtattatcccgattgacgcccggcaagagcaactcggctgcgcacatacactattcgcagaatgacttgggtgagtaactcaccagtcacagaaaaagcatcttac  
ggatggcatgacagtaagagaattatgcagtgctgccataacctgagtgataacactcggcccaacttactctgacaacgatcggaggaccgaaggagctaacccgtttttgcaca  
acatgggggatcatgtaactcgccttgatcgttgggaaccggagctgaatgaagcctacaaacgacgagcgtgacaccacgatgcctgtagcaatggcaacaacttgcgcaacta  
ttaactgggaactacttactctagcttcccggcaacaataatagactggatggaggcggataaaagtgcaggaccacttctgcgctcggcccttccggctggctggtttattgctga  
taaatctggagccggtgagcgtgggtctcgggtatcatgacgcaactggggccagatggtaagccctcccgatcgtagttatctacacgacggggagtcaggcaactatggatgaac  
gaaatagacagatcgctgagataggtgcctcactgattaagcattggttaactgtcagaccaagttactcataataactttagattgattaaaaactcatttttaattaaaaggatc  
taggtgaagatccttttgataatctcatgacaaaaatccctaacgtgagtttctgctccactgagcgtcagaccocgtagaaaaagatcaaaaggatctctttgagatcctttttct  
gocgtaactcgtccttgcaacaaaaaaaccaccgctaccagcgtggtttggttgcggatcaagagcctaccaactctttttcggaggtaactggctcagcagagcgcagatac  
caaatactgttctcttagtgtagccgtagttaggccaccactcaagaactctgtagcaccgcctacatacctcgctctgctaatcctgtttaccagtggtgctgccagtgccgataag  
tcgtgtctaccgggttgactcaagacgatagttaccggataaagcgcagcggctcgggtgaacggggggtcgtgcacacagcccagcttggagcgaacgacctacacogaactgag  
atacctacagcgtgagctatgaaaaagccacgcttcccgaagggaagagcggacaggtatccggttaagcggcagggctggaacaggagagcgcacgagggagcttccagggggaa  
acgctggtatctttatagtcctgtcgggtttcggccactctgacttgagcgtcgattttgtgatcctcgcaggggggggagcctatgaaaaacgcccagcaacgcccctttta  
cggttcctggccttttgcggcctttgctcacaatgcttctcctcgttatccctgattctgtggataaccgctattaccgctttgagtgagctgataccgctcgcggcggcaac  
gaccgagcgcagcagtgactgagcaggaagcgaagagcggcccaatcgcgaacccgctctccccgcccgtggccgattcattaatgcagctggcagcagaggttcccgactgga  
aagcggcagtgagcgaacgcaataaatgtgagttagctcactcattaggcaccocaggctttacactttatgctccggctcgtatgtgtgtggaattgtgagcggataaacaatt  
cacacggaaacagctatgacctgatctacgcaagcgcgaattaaacctcactaaaggaacaaaaagct
